# Supplementary material for: Ensemble-AMPPred: Robust AMP Prediction and Recognition Using the Ensemble Learning Method with a New Hybrid Feature for Differentiating AMPs
Source: MDPI journal article supplement (doi:10.3390/genes12020137), 2021-01-21
Supplement: s1 [file s1]

```
>Cluster 0
0      21aa, >antimicrobial... *
1      11aa, >antimicrobial... at 63.64%
2      17aa, >anti-Gram-;antibact... at 41.18%
3      13aa, >antimicrobial... at 61.54%
4      11aa, >antibacterial;antim... at 54.55%
5      22aa, >antimicrobial... at 40.91%
6      13aa, >antimicrobial... at 46.15%
7      16aa, >antibacterial;antim... at 43.75%
8      19aa, >antibacterial;antim... at 42.11%
9      11aa, >anti-HIV;Antifungal... at 45.45%
10     21aa, >antibacterial... at 42.86%
11     19aa, >antimicrobial... at 42.11%
12     16aa, >Antimicrobial... at 43.75%
13     13aa, >antimicrobial... at 46.15%
14     13aa, >anti-Gram+;antibact... at 46.15%
15     11aa, >anti-Gram+;antibact... at 45.45%
16     13aa, >anti-Gram+;antibact... at 46.15%
17     13aa, >anti-Gram+;antibact... at 46.15%
18     19aa, >antimicrobial... at 42.11%
19     13aa, >anti-Gram+;antimicr... at 46.15%
20     17aa, >antibacterial;Antif... at 41.18%
21     13aa, >antimicrobial... at 46.15%
22     11aa, >antimicrobial... at 33.64%
23     13aa, >antibacterial;antim... at 36.15%
24     13aa, >Antibacterial... at 36.15%
25     13aa, >anti-Gram+;Antimicr... at 36.15%
26     13aa, >Antimicrobial... at 36.15%
27     15aa, >antibacterial;antim... at 46.67%
28     15aa, >antimicrobial... at 35.00%
29     13aa, >anti-Gram+;Antibact... at 36.15%
30     13aa, >anti-Gram+;Antibact... at 36.15%
31     15aa, >antibacterial;antif... at 35.00%
32     13aa, >antimicrobial... at 61.54%
33     11aa, >anti-Gram+;antibact... at 54.55%
34     13aa, >antibacterial;antif... at 46.15%
35     13aa, >anti-Gram+;antibact... at 53.85%
36     13aa, >antibacterial;antif... at 53.85%
37     14aa, >anti-Gram+;Antibact... at 50.00%
38     15aa, >antimicrobial... at 35.00%
39     15aa, >antimicrobial... at 35.00%
40     13aa, >Antibacterial;Antif... at 36.15%
41     13aa, >antibacterial;antim... at 36.15%
42     15aa, >Antibacterial;antim... at 35.00%
43     13aa, >Antibacterial;Gram-... at 36.15%
44     15aa, >antimicrobial... at 46.67%
45     19aa, >antibacterial;antim... at 42.11%
46     13aa, >anti-Gram+;antibact... at 36.15%
47     15aa, >Antimicrobial... at 35.00%
48     13aa, >antibacterial;antif... at 36.15%
49     24aa, >anti-Gram+;antibact... at 41.67%
50     15aa, >antimicrobial... at 35.00%
51     13aa, >Antibacterial;Antif... at 36.15%
52     15aa, >antimicrobial... at 35.00%
```

53 19aa, >Antimicrobial... at 42.11%  
54 13aa, >antibacterial;Antif... at 36.15%  
55 13aa, >Antimicrobial... at 36.15%  
56 11aa, >Antibacterial... at 54.55%  
57 12aa, >Antibacterial... at 41.67%  
58 20aa, >antimicrobial... at 35.00%  
59 11aa, >Antifungal... at 45.45%  
60 19aa, >anti-Gram+;Antibact... at 42.11%  
61 15aa, >Antimicrobial... at 35.00%  
62 26aa, >antimicrobial.... \*  
63 17aa, >anti-Gram+;Antibact... at 41.18%  
64 17aa, >anti-Gram+;Antibact... at 42.94%  
65 12aa, >antimicrobial... at 41.67%  
66 11aa, >Antiviral... \*  
67 29aa, >Antimicrobial... at 41.38%  
68 12aa, >antimicrobial... at 50.00%  
69 13aa, >anti-Gram-... at 53.85%  
70 12aa, >Antifungal;Antimicr... at 41.67%  
71 12aa, >Antifungal;Antimicr... at 41.67%  
72 15aa, >Anti-Gram-... at 35.00%  
73 12aa, >antimicrobial... at 50.00%  
74 12aa, >Antimicrobial... at 50.00%  
75 13aa, >antibacterial... at 53.85%  
76 13aa, >antibacterial... at 46.15%  
77 12aa, >antimicrobial... at 41.67%  
78 11aa, >antimicrobial... at 45.45%  
79 12aa, >antibacterial... at 41.67%  
80 22aa, >antimicrobial... at 45.45%  
81 12aa, >Antifungal;Antimicr... at 50.00%  
82 12aa, >Antifungal;Antimicr... at 50.00%  
83 12aa, >antimicrobial... at 50.00%  
84 24aa, >Antimicrobial... at 41.67%  
85 19aa, >anti-Gram+;antibact... at 42.11%  
86 12aa, >Anti-Gram-... at 50.00%  
87 14aa, >antimicrobial... at 42.86%  
88 17aa, >Antimicrobial... at 47.06%  
89 17aa, >Antimicrobial... at 41.18%  
90 22aa, >Anti-Gram-;Antibact... at 40.91%  
91 22aa, >antibacterial;antim... at 40.91%  
92 14aa, >Antibacterial;Gram-... at 42.86%  
93 12aa, >antimicrobial... at 41.67%  
94 14aa, >antimicrobial.... at 42.86%  
95 12aa, >antibacterial;Antif... at 50.00%  
96 15aa, >antimicrobial... at 35.00%  
97 14aa, >Antibacterial... at 57.14%  
98 14aa, >anti-Gram+;antibact... at 57.14%  
99 14aa, >anti-Gram+;antibact... at 57.14%  
100 14aa, >Antibacterial;Antif... at 57.14%  
101 14aa, >anti-Gram+;antibact... at 42.86%  
102 14aa, >antibacterial;Antif... at 50.00%  
103 15aa, >Antibacterial... at 35.00%  
104 27aa, >anti-Gram+;antibact... \*  
105 28aa, >anti-Gram-;antibact... at 42.86%  
106 12aa, >antimicrobial... at 50.00%

107 13aa, >Gram-... at 46.15%  
108 22aa, >antibacterial;antim... at 40.91%  
109 11aa, >antithrombotic... at 45.45%  
110 15aa, >Antimicrobial... at 35.00%  
111 11aa, >antibacterial;antim... at 45.45%  
112 13aa, >antimicrobial... at 46.15%  
113 14aa, >antimicrobial... at 50.00%  
114 13aa, >antimicrobial... at 46.15%  
115 13aa, >antimicrobial... at 46.15%  
116 13aa, >Antibacterial;Antif... at 46.15%  
117 11aa, >anti-Gram+;Antibact... at 45.45%  
118 13aa, >antibacterial... at 46.15%  
119 15aa, >antibacterial;Antif... at 35.00%  
120 15aa, >antibacterial;Antif... at 35.00%  
121 18aa, >Antimicrobial... at 44.44%  
122 17aa, >Antimicrobial... at 52.94%  
123 17aa, >antibacterial;antim... at 41.18%  
124 11aa, >Antimicrobial... at 45.45%  
125 11aa, >anti-Gram+;antimicr... at 54.55%  
126 16aa, >antimicrobial... at 43.75%  
127 836aa, >Antimicrobial... \*  
128 11aa, >antibacterial;antim... at 54.55%  
129 11aa, >antibacterial;antim... at 45.45%  
130 20aa, >antimicrobial... at 35.00%  
131 12aa, >antithrombotic... at 41.67%  
132 12aa, >antibacterial;antim... at 41.67%  
133 18aa, >Antifungal... at 44.44%  
134 13aa, >anti-Gram+;antibact... at 61.54%  
135 16aa, >antimicrobial... at 50.00%  
136 14aa, >anti-Gram+;antibact... at 42.86%  
137 13aa, >anti-Gram+;antibact... at 46.15%  
138 11aa, >antimicrobial... at 45.45%  
139 17aa, >Antifungal... at 41.18%  
140 13aa, >anti-Gram-... at 46.15%  
141 20aa, >Antifungal... at 35.00%  
142 15aa, >Antifungal;Antimicr... at 35.00%  
143 23aa, >antifungal;antimicr... at 47.83%  
144 15aa, >Antifungal;Antimicr... at 35.00%  
145 13aa, >antibacterial06509... at 61.54%  
146 15aa, >antibacterial06574... at 35.00%  
147 20aa, >antibacterial06933... at 35.00%  
148 12aa, >antibacterial06934... \*  
149 12aa, >antibacterial06952... at 41.67%  
150 13aa, >antibacterial07014... at 46.15%  
151 12aa, >antibacterial07018... at 41.67%  
152 12aa, >antibacterial07021... at 50.00%  
153 20aa, >antibacterial07037... at 35.00%  
154 14aa, >antibacterial07050... at 42.86%  
155 13aa, >antibacterial07376... at 46.15%  
156 12aa, >antibacterial07385... at 41.67%  
157 12aa, >antibacterial07423... at 41.67%  
158 11aa, >antibacterial07473... \*  
159 11aa, >antibacterial07474... at 45.45%  
160 20aa, >antibacterial07524... at 35.00%

161 25aa, >antibacterial07531... at 35.00%  
162 14aa, >antibacterial07532... at 42.86%  
163 20aa, >antibacterial07559... at 35.00%  
164 14aa, >antibacterial07659... at 50.00%  
165 20aa, >antibacterial07675... at 35.00%  
166 14aa, >antibacterial07686... at 42.86%  
167 14aa, >antibacterial07689... at 42.86%  
168 15aa, >antibacterial07690... at 35.00%  
169 11aa, >antibacterial07710... at 45.45%  
170 11aa, >antibacterial07738... at 45.45%  
171 15aa, >antibacterial07740... at 35.00%  
172 11aa, >antibacterial07829... at 54.55%  
173 11aa, >antibacterial07830... at 54.55%  
174 17aa, >antibacterial07885... at 47.06%  
175 13aa, >antibacterial07903... at 46.15%  
176 12aa, >antibacterial07915... at 41.67%  
177 20aa, >antibacterial07949... at 35.00%  
178 12aa, >antibacterial07964... at 41.67%  
179 11aa, >antibacterial07978... at 45.45%  
180 14aa, >antibacterial07979... at 42.86%  
181 14aa, >antibacterial07980... at 42.86%  
182 12aa, >antibacterial08034... at 41.67%  
183 13aa, >antibacterial08078... at 46.15%  
184 13aa, >antibacterial08083... at 46.15%  
185 13aa, >antibacterial08086... at 46.15%  
186 16aa, >antibacterial08170... at 43.75%  
187 13aa, >antibacterial08172... at 46.15%  
188 15aa, >antibacterial08196... at 35.00%  
189 15aa, >antibacterial08198... at 35.00%  
190 11aa, >antibacterial08206... at 54.55%  
191 11aa, >antibacterial08211... at 45.45%  
192 21aa, >antibacterial08308... at 42.86%  
193 13aa, >antibacterial08385... at 46.15%  
194 16aa, >antibacterial08415... at 50.00%  
195 27aa, >antibacterial08418... at 40.74%  
196 18aa, >antibacterial08452... at 50.00%  
197 20aa, >antibacterial08479... at 35.00%  
198 11aa, >antibacterial08516... at 45.45%  
199 12aa, >antibacterial08529... at 41.67%  
200 28aa, >antibacterial08572... at 42.86%  
201 14aa, >antibacterial08605... at 50.00%  
202 14aa, >antibacterial08606... at 50.00%  
203 14aa, >antibacterial08607... at 50.00%  
204 14aa, >antibacterial08636... at 42.86%  
205 15aa, >antibacterial08698... at 35.00%  
206 17aa, >antibacterial08711... at 52.94%  
207 18aa, >antibacterial08733... at 50.00%  
208 14aa, >antibacterial08735... at 57.14%  
209 14aa, >antibacterial08737... at 42.86%  
210 14aa, >antibacterial08739... at 42.86%  
211 14aa, >antibacterial08740... at 50.00%  
212 15aa, >antibacterial08741... at 35.00%  
213 11aa, >antibacterial08755... at 54.55%  
214 12aa, >antibacterial08779... at 50.00%

215 18aa, >antibacterial08780... at 50.00%  
216 15aa, >antibacterial08784... at 35.00%  
217 12aa, >antibacterial08791... at 41.67%  
218 11aa, >antibacterial08822... at 45.45%  
219 15aa, >antibacterial08825... at 35.00%  
220 12aa, >antibacterial08841... at 41.67%  
221 12aa, >antibacterial08842... at 41.67%  
222 17aa, >antibacterial08847... at 47.06%  
223 13aa, >antibacterial08850... at 46.15%  
224 17aa, >antibacterial08857... at 47.06%  
225 12aa, >antibacterial08936... at 41.67%  
226 12aa, >antibacterial08937... at 41.67%  
227 12aa, >antibacterial08938... at 41.67%  
228 12aa, >antibacterial08939... at 41.67%  
229 12aa, >antibacterial08972... at 41.67%  
230 13aa, >antibacterial08975... at 46.15%  
231 18aa, >antibacterial09009... at 50.00%  
232 12aa, >antibacterial09023... at 41.67%  
233 12aa, >antibacterial09024... at 41.67%  
234 14aa, >antibacterial09080... at 42.86%  
235 14aa, >antibacterial09081... at 42.86%  
236 13aa, >antibacterial09130... at 46.15%  
237 13aa, >antibacterial09131... at 53.85%  
238 13aa, >antibacterial09135... at 46.15%  
239 13aa, >antibacterial09136... at 53.85%  
240 13aa, >antibacterial09138... at 46.15%  
241 13aa, >antibacterial09140... at 46.15%  
242 15aa, >antibacterial09279... at 35.00%  
243 11aa, >antibacterial09321... at 45.45%  
244 15aa, >antibacterial09337... at 35.00%  
245 20aa, >antibacterial09382... at 35.00%  
246 20aa, >antibacterial09394... at 50.00%  
247 20aa, >antibacterial09400... at 45.00%  
248 11aa, >antibacterial09402... at 45.45%  
249 20aa, >antibacterial09405... at 35.00%  
250 20aa, >antibacterial09412... at 35.00%  
251 14aa, >antibacterial09413... at 50.00%  
252 20aa, >antibacterial09421... at 45.00%  
253 20aa, >antibacterial09428... at 35.00%  
254 20aa, >antibacterial09434... at 45.00%  
255 20aa, >antibacterial09443... at 35.00%  
256 20aa, >antibacterial09450... at 35.00%  
257 20aa, >antibacterial09451... at 35.00%  
258 20aa, >antibacterial09456... at 45.00%  
259 22aa, >antibacterial09474... at 40.91%  
260 13aa, >antibacterial09539... at 46.15%  
261 13aa, >antibacterial09541... \*  
262 13aa, >antibacterial09569... at 53.85%  
263 11aa, >antibacterial09573... at 54.55%  
264 14aa, >antibacterial09632... at 42.86%  
265 18aa, >antibacterial09673... at 44.44%  
266 15aa, >antibacterial09680... at 35.00%  
267 15aa, >antibacterial09682... at 35.00%  
268 13aa, >antibacterial09725... at 46.15%

|     |                              |           |
|-----|------------------------------|-----------|
| 269 | 13aa, >antibacterial09729... | at 46.15% |
| 270 | 13aa, >antibacterial09742... | at 46.15% |
| 271 | 13aa, >antibacterial09743... | at 53.85% |
| 272 | 13aa, >antibacterial09813... | at 61.54% |
| 273 | 14aa, >antibacterial09814... | at 57.14% |
| 274 | 11aa, >antibacterial09826... | at 54.55% |
| 275 | 11aa, >antibacterial09828... | at 54.55% |
| 276 | 11aa, >antibacterial09829... | at 54.55% |
| 277 | 11aa, >antibacterial09832... | at 54.55% |
| 278 | 14aa, >antibacterial09910... | at 42.86% |
| 279 | 12aa, >antibacterial09950... | at 41.67% |
| 280 | 12aa, >antibacterial09951... | at 41.67% |
| 281 | 11aa, >antibacterial09981... | at 45.45% |
| 282 | 12aa, >antibacterial09992... | at 41.67% |
| 283 | 15aa, >antibacterial10002... | at 35.00% |
| 284 | 12aa, >antibacterial10030... | at 41.67% |
| 285 | 15aa, >antibacterial10075... | at 35.00% |
| 286 | 14aa, >antibacterial10078... | at 42.86% |
| 287 | 13aa, >antibacterial10104... | at 46.15% |
| 288 | 12aa, >antibacterial10147... | at 41.67% |
| 289 | 17aa, >antibacterial10213... | at 41.18% |
| 290 | 17aa, >antibacterial10214... | at 41.18% |
| 291 | 12aa, >antibacterial10242... | at 41.67% |
| 292 | 12aa, >antibacterial10246... | at 41.67% |
| 293 | 20aa, >antibacterial10259... | at 50.00% |
| 294 | 20aa, >antibacterial10260... | at 45.00% |
| 295 | 11aa, >antibacterial10284... | at 45.45% |
| 296 | 19aa, >antibacterial10311... | at 47.37% |
| 297 | 19aa, >antibacterial10313... | at 47.37% |
| 298 | 19aa, >antibacterial10314... | at 42.11% |
| 299 | 21aa, >antibacterial10328... | at 52.38% |
| 300 | 14aa, >antibacterial10384... | at 42.86% |
| 301 | 14aa, >antibacterial10416... | at 50.00% |
| 302 | 15aa, >antibacterial10438... | at 35.00% |
| 303 | 16aa, >antibacterial10451... | at 50.00% |
| 304 | 14aa, >antibacterial10477... | at 42.86% |
| 305 | 14aa, >antibacterial10479... | at 42.86% |
| 306 | 16aa, >antibacterial10490... | at 43.75% |
| 307 | 15aa, >antibacterial10517... | at 35.00% |
| 308 | 11aa, >antibacterial10561... | at 45.45% |
| 309 | 11aa, >antibacterial10596... | at 45.45% |
| 310 | 15aa, >antibacterial10645... | at 35.00% |
| 311 | 13aa, >antibacterial10690... | at 46.15% |
| 312 | 13aa, >antibacterial10716... | at 46.15% |
| 313 | 18aa, >antibacterial10728... | at 44.44% |
| 314 | 15aa, >antibacterial10729... | at 35.00% |
| 315 | 11aa, >antibacterial10766... | at 45.45% |
| 316 | 14aa, >antibacterial10841... | at 42.86% |
| 317 | 27aa, >antibacterial10854... | at 48.15% |
| 318 | 21aa, >antibacterial10872... | at 42.86% |
| 319 | 20aa, >antibacterial10924... | at 35.00% |
| 320 | 20aa, >antibacterial10956... | at 45.00% |
| 321 | 20aa, >antibacterial10957... | at 45.00% |
| 322 | 20aa, >antibacterial10958... | at 35.00% |

323 14aa, >antibacterial110962... at 42.86%  
324 14aa, >antibacterial111139... at 42.86%  
325 14aa, >antibacterial111140... \*  
326 14aa, >antibacterial111141... at 50.00%  
327 14aa, >antibacterial111142... at 50.00%  
328 14aa, >antibacterial111143... at 50.00%  
329 12aa, >antibacterial111144... at 41.67%  
330 19aa, >antibacterial111156... at 42.11%  
331 13aa, >antibacterial111158... at 46.15%  
332 14aa, >antibacterial111167... at 42.86%  
333 14aa, >antibacterial111168... at 42.86%  
334 14aa, >antibacterial111170... at 42.86%  
335 18aa, >antibacterial111195... at 44.44%  
336 12aa, >antibacterial111198... at 50.00%  
337 14aa, >antibacterial111223... at 42.86%  
338 20aa, >antibacterial111248... at 35.00%  
339 20aa, >antibacterial111263... at 45.00%  
340 15aa, >antibacterial111301... at 35.00%  
341 20aa, >antibacterial111303... at 35.00%  
342 13aa, >antibacterial111313... at 46.15%  
343 20aa, >antibacterial111327... at 35.00%  
344 35aa, >antibacterial111341... \*  
345 12aa, >antibacterial111345... at 41.67%  
346 15aa, >antibacterial111347... at 35.00%  
347 21aa, >antibacterial111349... at 42.86%  
348 15aa, >antibacterial111357... at 35.00%  
349 12aa, >antibacterial111400... at 50.00%  
350 15aa, >antibacterial111422... at 35.00%  
351 30aa, >antibacterial111437... at 35.00%  
352 15aa, >antibacterial111493... at 46.67%  
353 17aa, >antibacterial111525... at 41.18%  
354 15aa, >antibacterial111529... at 35.00%  
355 15aa, >antibacterial111557... at 35.00%  
356 12aa, >antibacterial111568... at 41.67%  
357 15aa, >antibacterial111579... at 35.00%  
358 11aa, >antibacterial111600... at 54.55%  
359 15aa, >antibacterial111604... at 35.00%  
360 13aa, >antibacterial111650... at 46.15%  
361 20aa, >antibacterial111660... at 50.00%  
362 15aa, >antibacterial111665... at 35.00%  
363 16aa, >antibacterial111682... at 43.75%  
364 19aa, >antibacterial111688... at 42.11%  
365 13aa, >antibacterial111690... \*  
366 14aa, >antibacterial111693... at 42.86%  
367 13aa, >antibacterial111695... at 46.15%  
368 13aa, >antibacterial111698... at 53.85%  
369 13aa, >antibacterial111701... at 46.15%  
370 13aa, >antibacterial111702... at 46.15%  
371 13aa, >antibacterial111705... at 46.15%  
372 15aa, >antibacterial111715... \*  
373 17aa, >antibacterial111782... at 41.18%  
374 27aa, >antibacterial111798... at 44.44%  
375 17aa, >antibacterial111833... at 47.06%  
376 15aa, >antibacterial111841... at 53.33%

377 15aa, >antibacterial11852... at 35.00%  
378 12aa, >antibacterial11855... at 50.00%  
379 12aa, >antibacterial11857... at 50.00%  
380 13aa, >antibacterial11877... at 46.15%  
381 15aa, >antibacterial11905... at 35.00%  
382 15aa, >antibacterial11909... at 35.00%  
383 16aa, >antibacterial11910... at 43.75%  
384 20aa, >antibacterial11919... at 50.00%  
385 13aa, >antibacterial11923... at 46.15%  
386 15aa, >antibacterial11962... at 35.00%  
387 14aa, >antibacterial11966... at 50.00%  
388 14aa, >antibacterial11968... at 42.86%  
389 14aa, >antibacterial11969... at 42.86%  
390 12aa, >antibacterial11987... at 41.67%  
391 12aa, >antibacterial11988... at 41.67%  
392 20aa, >antibacterial12020... at 35.00%  
393 14aa, >antibacterial12027... at 57.14%  
394 14aa, >antibacterial12072... \*  
395 15aa, >antibacterial12073... at 35.00%  
396 13aa, >antibacterial12074... at 46.15%  
397 15aa, >antibacterial12105... at 46.67%  
398 17aa, >antibacterial12138... at 41.18%  
399 12aa, >antibacterial12141... at 66.67%  
400 18aa, >antibacterial12172... at 55.56%  
401 13aa, >antibacterial12180... at 46.15%  
402 13aa, >antibacterial12235... at 46.15%  
403 13aa, >antibacterial12279... at 46.15%  
404 18aa, >antibacterial12336... at 44.44%  
405 20aa, >antibacterial12378... at 35.00%  
406 12aa, >antibacterial12389... at 41.67%  
407 17aa, >antibacterial12404... at 41.18%  
408 20aa, >antibacterial12452... at 45.00%  
409 24aa, >antibacterial12457... at 45.83%  
410 12aa, >antibacterial12460... at 41.67%  
411 15aa, >antibacterial12478... at 35.00%  
412 20aa, >antibacterial12510... at 35.00%  
413 15aa, >antibacterial12517... at 35.00%  
414 14aa, >antibacterial12527... at 42.86%  
415 12aa, >antibacterial12531... at 41.67%  
416 12aa, >antibacterial12562... at 41.67%  
417 15aa, >antibacterial12597... at 35.00%  
418 12aa, >antibacterial12602... at 41.67%  
419 15aa, >antibacterial12640... at 35.00%  
420 20aa, >antibacterial12670... at 35.00%  
421 15aa, >antibacterial12715... at 46.67%  
422 20aa, >antibacterial12717... at 55.00%  
423 18aa, >antibacterial12723... at 44.44%  
424 15aa, >antibacterial12737... at 46.67%  
425 15aa, >antibacterial12796... at 35.00%  
426 20aa, >antibacterial12797... at 35.00%  
427 13aa, >antibacterial12817... at 46.15%  
428 20aa, >antibacterial12873... at 35.00%  
429 15aa, >antibacterial12874... at 53.33%  
430 15aa, >antibacterial12885... at 35.00%



```

431 15aa, >antibacterial112902... at 35.00%
432 15aa, >antibacterial112963... at 35.00%
433 11aa, >antibacterial112968... at 45.45%
434 11aa, >antibacterial112969... at 45.45%
435 12aa, >antibacterial112970... at 41.67%
436 17aa, >antibacterial112985... at 47.06%
437 13aa, >antibacterial112988... at 46.15%
438 18aa, >antibacterial113006... at 44.44%
439 15aa, >antibacterial113009... at 35.00%
440 12aa, >antibacterial113041... at 41.67%
441 12aa, >antibacterial113055... at 50.00%
442 20aa, >antibacterial113060... at 35.00%
443 12aa, >antibacterial113086... at 41.67%
444 18aa, >antibacterial113089... at 44.44%
445 18aa, >antibacterial113102... at 44.44%
446 12aa, >antibacterial113105... at 41.67%
447 12aa, >antibacterial113110... at 50.00%
448 12aa, >antibacterial113112... at 41.67%
449 12aa, >antibacterial113115... at 50.00%
450 12aa, >antibacterial113117... at 41.67%
451 12aa, >antibacterial113118... at 50.00%
452 20aa, >antibacterial113145... at 35.00%
453 20aa, >antibacterial113158... at 35.00%
454 12aa, >antibacterial113171... at 41.67%
455 17aa, >antibacterial113188... at 52.94%
456 12aa, >antibacterial113212... at 41.67%
457 15aa, >antibacterial113225... at 35.00%
458 18aa, >antibacterial113241... at 44.44%
459 14aa, >antibacterial113250... *
460 14aa, >antibacterial113252... at 42.86%
461 14aa, >antibacterial113254... at 42.86%
462 12aa, >antibacterial113256... at 41.67%
463 12aa, >antibacterial113277... at 50.00%
464 12aa, >antibacterial113285... at 41.67%
465 12aa, >antibacterial113286... at 41.67%
466 20aa, >antibacterial113308... at 35.00%
467 12aa, >antibacterial113354... at 50.00%
468 20aa, >antibacterial113388... at 35.00%
469 14aa, >antibacterial113395... at 42.86%
470 12aa, >antibacterial113405... at 41.67%
471 12aa, >antibacterial113406... at 41.67%
472 15aa, >antibacterial113422... at 46.67%
>Cluster 1
0 26aa, >anti-Gram+;antifung... *
1 17aa, >Antimicrobial... at 41.18%
2 13aa, >anti-Gram-;antibact... at 33.85%
3 15aa, >Antifungal... at 46.67%
4 11aa, >Antibacterial;Antif... at 45.45%
5 11aa, >Antibacterial;Antif... at 45.45%
6 17aa, >antimicrobial... *
7 12aa, >antimicrobial... at 48.33%
8 20aa, >Antifungal... at 35.00%
9 12aa, >antifungal... at 50.00%
10 13aa, >antimicrobial... at 46.15%

```

11 20aa, >Antibacterial... at 45.00%  
12 13aa, >antimicrobial... at 46.15%  
13 13aa, >antimicrobial... at 46.15%  
14 12aa, >antibacterial;Antif... at 41.67%  
15 24aa, >antifungal;antimicr... at 41.67%  
16 19aa, >Antimicrobial... at 47.37%  
17 22aa, >Antimicrobial... at 45.45%  
18 14aa, >antibacterial... at 42.86%  
19 12aa, >antimicrobial... at 41.67%  
20 17aa, >anti-Gram+;Antibact... at 41.18%  
21 17aa, >anti-Gram+;antimicr... at 47.06%  
22 27aa, >antimicrobial... at 44.44%  
23 11aa, >Antiviral... at 54.55%  
24 25aa, >anti-Gram+;antibact... at 35.00%  
25 11aa, >Antiviral... at 45.45%  
26 14aa, >anti-Gram+;antibact... at 42.86%  
27 29aa, >Antimicrobial... at 41.38%  
28 28aa, >antifungal;antimicr... at 46.43%  
29 14aa, >antibacterial;Antif... at 42.86%  
30 21aa, >antimicrobial... at 47.62%  
31 20aa, >anti-Gram+;Antibact... at 45.00%  
32 12aa, >Antifungal;Antimicr... at 41.67%  
33 12aa, >Antifungal;Antimicr... at 41.67%  
34 20aa, >anti-Gram+;Antibact... at 50.00%  
35 20aa, >antimicrobial... at 35.00%  
36 11aa, >antimicrobial... at 54.55%  
37 20aa, >Antibacterial... at 35.00%  
38 12aa, >antimicrobial... at 41.67%  
39 21aa, >antibacterial;antim... at 42.86%  
40 22aa, >antimicrobial... at 40.91%  
41 12aa, >Antifungal;Antimicr... at 41.67%  
42 12aa, >Antifungal;Antimicr... at 41.67%  
43 12aa, >Antifungal;antibact... at 41.67%  
44 15aa, >Antimicrobial... at 35.00%  
45 17aa, >Antifungal;Antibact... at 41.18%  
46 14aa, >Antiviral... at 50.00%  
47 15aa, >Antimicrobial... at 46.67%  
48 12aa, >antimicrobial... at 50.00%  
49 14aa, >antibacterial;Antif... at 50.00%  
50 14aa, >antimicrobial... at 50.00%  
51 11aa, >Antibacterial... at 54.55%  
52 14aa, >Antibacterial... at 50.00%  
53 16aa, >anti-Gram+;antibact... at 43.75%  
54 12aa, >Antibacterial;Gram-... at 50.00%  
55 12aa, >anti-Gram+;antibact... at 41.67%  
56 13aa, >anti-Gram+;antifung... at 46.15%  
57 17aa, >anti-Gram+;Antimicr... at 41.18%  
58 14aa, >Antibacterial... at 50.00%  
59 17aa, >anti-Gram+;antibact... at 47.06%  
60 14aa, >anti-Gram+;antibact... \*  
61 16aa, >antimicrobial... at 43.75%  
62 11aa, >Antibacterial;Gram-... at 54.55%  
63 20aa, >Antibacterial... at 35.00%  
64 12aa, >antimicrobial... at 41.67%

65 12aa, >antimicrobial... at 50.00%  
66 14aa, >Antimicrobial... at 42.86%  
67 15aa, >Antibacterial;Antim... at 46.67%  
68 15aa, >Antibacterial... at 46.67%  
69 13aa, >antimicrobial... at 53.85%  
70 16aa, >Antimicrobial... at 43.75%  
71 22aa, >antibacterial;antim... at 40.91%  
72 14aa, >antibacterial... at 42.86%  
73 14aa, >antibacterial... at 42.86%  
74 14aa, >antibacterial... at 50.00%  
75 20aa, >Antimicrobial... at 35.00%  
76 11aa, >antibacterial;antim... at 45.45%  
77 12aa, >antibacterial;Antif... at 41.67%  
78 19aa, >antibacterial;Antif... at 47.37%  
79 626aa, >Antimicrobial... \*  
80 626aa, >Antimicrobial... at 71.31%  
81 49aa, >Antimicrobial... at 40.82%  
82 11aa, >antibacterial;antim... at 45.45%  
83 13aa, >anti-Gram+;antibact... at 46.15%  
84 15aa, >anti-Gram-;antibact... at 35.00%  
85 23aa, >antibacterial;Antif... at 43.48%  
86 19aa, >anti-Gram+;antibact... at 42.11%  
87 18aa, >antimicrobial... at 44.44%  
88 15aa, >antifungal... at 46.67%  
89 14aa, >antimicrobial... at 42.86%  
90 11aa, >Antimicrobial... at 45.45%  
91 14aa, >antibacterial... at 42.86%  
92 15aa, >Antifungal;Antimicr... at 46.67%  
93 11aa, >anti-Gram+... at 45.45%  
94 11aa, >anti-Gram+... at 45.45%  
95 12aa, >antimicrobial... at 41.67%  
96 12aa, >antifungal... at 50.00%  
97 12aa, >antifungal... at 41.67%  
98 12aa, >antifungal... at 41.67%  
99 12aa, >antifungal... at 41.67%  
100 12aa, >Antibacterial... at 41.67%  
101 12aa, >antibacterial06444... at 41.67%  
102 20aa, >antibacterial06524... at 45.00%  
103 14aa, >antibacterial06689... at 42.86%  
104 16aa, >antibacterial07032... at 43.75%  
105 14aa, >antibacterial07049... at 57.14%  
106 16aa, >antibacterial07057... at 50.00%  
107 20aa, >antibacterial07519... at 35.00%  
108 21aa, >antibacterial07534... at 42.86%  
109 20aa, >antibacterial07657... at 35.00%  
110 12aa, >antibacterial07726... at 41.67%  
111 12aa, >antibacterial07828... at 41.67%  
112 16aa, >antibacterial07886... at 43.75%  
113 15aa, >antibacterial07896... at 35.00%  
114 26aa, >antibacterial07935... at 42.31%  
115 20aa, >antibacterial07947... at 35.00%  
116 15aa, >antibacterial07967... at 35.00%  
117 15aa, >antibacterial07974... at 35.00%  
118 20aa, >antibacterial08040... at 35.00%

119 17aa, >antibacterial08064... at 41.18%  
120 25aa, >antibacterial08069... at 44.00%  
121 11aa, >antibacterial08100... \*  
122 20aa, >antibacterial08252... at 35.00%  
123 20aa, >antibacterial08256... at 35.00%  
124 11aa, >antibacterial08303... at 45.45%  
125 15aa, >antibacterial08439... at 35.00%  
126 15aa, >antibacterial08445... at 35.00%  
127 15aa, >antibacterial08446... at 35.00%  
128 14aa, >antibacterial08466... at 42.86%  
129 14aa, >antibacterial08474... at 42.86%  
130 12aa, >antibacterial08506... at 41.67%  
131 11aa, >antibacterial08515... at 54.55%  
132 12aa, >antibacterial08527... at 41.67%  
133 12aa, >antibacterial08536... at 41.67%  
134 12aa, >antibacterial08587... at 41.67%  
135 26aa, >antibacterial08599... at 42.31%  
136 17aa, >antibacterial08629... at 41.18%  
137 14aa, >antibacterial08643... at 42.86%  
138 19aa, >antibacterial08656... at 57.89%  
139 14aa, >antibacterial08678... at 42.86%  
140 14aa, >antibacterial08707... at 50.00%  
141 20aa, >antibacterial08714... at 45.00%  
142 13aa, >antibacterial08722... at 53.85%  
143 22aa, >antibacterial08726... at 40.91%  
144 15aa, >antibacterial08732... at 35.00%  
145 15aa, >antibacterial08749... at 60.00%  
146 11aa, >antibacterial08763... at 45.45%  
147 11aa, >antibacterial08764... at 45.45%  
148 11aa, >antibacterial08775... at 45.45%  
149 15aa, >antibacterial08776... \*  
150 11aa, >antibacterial08777... at 45.45%  
151 11aa, >antibacterial08778... at 45.45%  
152 12aa, >antibacterial08790... at 41.67%  
153 15aa, >antibacterial08793... at 35.00%  
154 11aa, >antibacterial08797... at 45.45%  
155 11aa, >antibacterial08799... at 45.45%  
156 11aa, >antibacterial08800... at 45.45%  
157 11aa, >antibacterial08801... at 45.45%  
158 11aa, >antibacterial08803... at 45.45%  
159 11aa, >antibacterial08805... at 45.45%  
160 15aa, >antibacterial08809... at 35.00%  
161 15aa, >antibacterial08811... at 35.00%  
162 15aa, >antibacterial08812... at 46.67%  
163 13aa, >antibacterial08906... \*  
164 20aa, >antibacterial08946... at 35.00%  
165 12aa, >antibacterial08963... at 41.67%  
166 12aa, >antibacterial08986... at 41.67%  
167 12aa, >antibacterial09027... at 41.67%  
168 12aa, >antibacterial09029... at 41.67%  
169 22aa, >antibacterial09047... at 40.91%  
170 15aa, >antibacterial09152... at 46.67%  
171 12aa, >antibacterial09153... at 50.00%  
172 12aa, >antibacterial09155... at 41.67%

|     |       |                        |    |        |
|-----|-------|------------------------|----|--------|
| 173 | 14aa, | >antibacterial09165... | at | 50.00% |
| 174 | 12aa, | >antibacterial09242... | at | 41.67% |
| 175 | 12aa, | >antibacterial09251... | at | 41.67% |
| 176 | 12aa, | >antibacterial09263... | at | 58.33% |
| 177 | 15aa, | >antibacterial09276... | at | 46.67% |
| 178 | 15aa, | >antibacterial09284... | at | 46.67% |
| 179 | 26aa, | >antibacterial09292... | at | 46.15% |
| 180 | 20aa, | >antibacterial09351... | at | 45.00% |
| 181 | 20aa, | >antibacterial09352... | at | 35.00% |
| 182 | 20aa, | >antibacterial09353... | at | 45.00% |
| 183 | 20aa, | >antibacterial09354... | at | 45.00% |
| 184 | 20aa, | >antibacterial09357... | at | 35.00% |
| 185 | 20aa, | >antibacterial09358... | at | 35.00% |
| 186 | 20aa, | >antibacterial09359... | at | 35.00% |
| 187 | 20aa, | >antibacterial09361... | at | 35.00% |
| 188 | 20aa, | >antibacterial09362... | at | 35.00% |
| 189 | 20aa, | >antibacterial09365... | at | 35.00% |
| 190 | 20aa, | >antibacterial09366... | at | 35.00% |
| 191 | 20aa, | >antibacterial09368... | at | 35.00% |
| 192 | 20aa, | >antibacterial09370... | at | 50.00% |
| 193 | 20aa, | >antibacterial09372... | at | 50.00% |
| 194 | 20aa, | >antibacterial09373... | at | 35.00% |
| 195 | 20aa, | >antibacterial09374... | at | 45.00% |
| 196 | 20aa, | >antibacterial09375... | at | 45.00% |
| 197 | 20aa, | >antibacterial09389... | at | 35.00% |
| 198 | 20aa, | >antibacterial09441... | at | 35.00% |
| 199 | 20aa, | >antibacterial09445... | at | 50.00% |
| 200 | 13aa, | >antibacterial09561... | at | 53.85% |
| 201 | 15aa, | >antibacterial09604... | at | 46.67% |
| 202 | 15aa, | >antibacterial09606... | at | 46.67% |
| 203 | 15aa, | >antibacterial09607... | at | 46.67% |
| 204 | 15aa, | >antibacterial09608... | at | 35.00% |
| 205 | 15aa, | >antibacterial09610... | at | 46.67% |
| 206 | 15aa, | >antibacterial09611... | at | 35.00% |
| 207 | 11aa, | >antibacterial09624... | at | 54.55% |
| 208 | 11aa, | >antibacterial09640... | at | 54.55% |
| 209 | 11aa, | >antibacterial09641... | at | 45.45% |
| 210 | 11aa, | >antibacterial09642... | at | 45.45% |
| 211 | 15aa, | >antibacterial09676... | at | 46.67% |
| 212 | 25aa, | >antibacterial09684... | at | 35.00% |
| 213 | 25aa, | >antibacterial09687... | at | 35.00% |
| 214 | 18aa, | >antibacterial09696... | at | 44.44% |
| 215 | 18aa, | >antibacterial09708... | at | 44.44% |
| 216 | 18aa, | >antibacterial09720... | at | 44.44% |
| 217 | 13aa, | >antibacterial09728... | at | 46.15% |
| 218 | 11aa, | >antibacterial09775... | at | 45.45% |
| 219 | 11aa, | >antibacterial09776... | at | 45.45% |
| 220 | 12aa, | >antibacterial09783... | at | 50.00% |
| 221 | 11aa, | >antibacterial09802... | at | 45.45% |
| 222 | 16aa, | >antibacterial09804... | at | 50.00% |
| 223 | 11aa, | >antibacterial09917... | at | 45.45% |
| 224 | 12aa, | >antibacterial09970... | at | 41.67% |
| 225 | 12aa, | >antibacterial09972... | at | 41.67% |
| 226 | 12aa, | >antibacterial09973... | at | 50.00% |

227 15aa, >antibacterial09988... at 35.00%  
228 12aa, >antibacterial09998... at 41.67%  
229 15aa, >antibacterial10001... at 46.67%  
230 12aa, >antibacterial10004... at 41.67%  
231 12aa, >antibacterial10024... at 41.67%  
232 12aa, >antibacterial10025... at 58.33%  
233 12aa, >antibacterial10026... at 50.00%  
234 12aa, >antibacterial10027... at 50.00%  
235 12aa, >antibacterial10028... at 41.67%  
236 12aa, >antibacterial10061... at 41.67%  
237 12aa, >antibacterial10062... at 50.00%  
238 15aa, >antibacterial10074... at 35.00%  
239 13aa, >antibacterial10087... at 46.15%  
240 15aa, >antibacterial10148... at 35.00%  
241 11aa, >antibacterial10183... at 45.45%  
242 13aa, >antibacterial10211... at 46.15%  
243 12aa, >antibacterial10231... at 50.00%  
244 20aa, >antibacterial10235... at 50.00%  
245 22aa, >antibacterial10247... at 40.91%  
246 12aa, >antibacterial10318... at 41.67%  
247 13aa, >antibacterial10338... at 53.85%  
248 15aa, >antibacterial10361... at 46.67%  
249 14aa, >antibacterial10376... at 42.86%  
250 14aa, >antibacterial10415... at 50.00%  
251 14aa, >antibacterial10437... at 42.86%  
252 15aa, >antibacterial10467... at 46.67%  
253 12aa, >antibacterial10511... at 50.00%  
254 19aa, >antibacterial10514... at 42.11%  
255 12aa, >antibacterial10536... at 41.67%  
256 14aa, >antibacterial10557... at 42.86%  
257 14aa, >antibacterial10558... at 42.86%  
258 11aa, >antibacterial10600... at 45.45%  
259 22aa, >antibacterial10671... at 45.45%  
260 13aa, >antibacterial10685... at 46.15%  
261 13aa, >antibacterial10688... at 46.15%  
262 20aa, >antibacterial10722... at 35.00%  
263 20aa, >antibacterial10768... at 45.00%  
264 20aa, >antibacterial10769... at 45.00%  
265 17aa, >antibacterial10937... at 41.18%  
266 20aa, >antibacterial10959... at 45.00%  
267 14aa, >antibacterial11109... at 64.29%  
268 13aa, >antibacterial11127... at 53.85%  
269 14aa, >antibacterial11145... at 50.00%  
270 14aa, >antibacterial11146... at 42.86%  
271 16aa, >antibacterial11151... at 43.75%  
272 15aa, >antibacterial11164... at 46.67%  
273 14aa, >antibacterial11169... at 50.00%  
274 12aa, >antibacterial11193... at 41.67%  
275 11aa, >antibacterial11197... at 54.55%  
276 11aa, >antibacterial11204... at 54.55%  
277 12aa, >antibacterial11218... at 41.67%  
278 12aa, >antibacterial11224... at 41.67%  
279 14aa, >antibacterial11229... at 42.86%  
280 14aa, >antibacterial11232... at 50.00%

281 14aa, >antibacterial11239... \*

282 14aa, >antibacterial11240... at 50.00%

283 13aa, >antibacterial11260... at 46.15%

284 20aa, >antibacterial11286... at 35.00%

285 20aa, >antibacterial11287... at 35.00%

286 15aa, >antibacterial11288... at 35.00%

287 21aa, >antibacterial11348... at 47.62%

288 21aa, >antibacterial11350... at 42.86%

289 15aa, >antibacterial11502... at 46.67%

290 16aa, >antibacterial11516... at 50.00%

291 15aa, >antibacterial11517... at 46.67%

292 17aa, >antibacterial11533... at 41.18%

293 15aa, >antibacterial11534... at 35.00%

294 15aa, >antibacterial11581... at 46.67%

295 18aa, >antibacterial11611... at 44.44%

296 14aa, >antibacterial11624... at 42.86%

297 12aa, >antibacterial11658... at 41.67%

298 13aa, >antibacterial11672... at 46.15%

299 13aa, >antibacterial11709... at 53.85%

300 15aa, >antibacterial11710... at 35.00%

301 15aa, >antibacterial11783... at 46.67%

302 11aa, >antibacterial11847... at 45.45%

303 15aa, >antibacterial11868... at 35.00%

304 16aa, >antibacterial11879... at 43.75%

305 18aa, >antibacterial11903... at 44.44%

306 15aa, >antibacterial11915... at 35.00%

307 15aa, >antibacterial11932... at 35.00%

308 13aa, >antibacterial11942... at 46.15%

309 14aa, >antibacterial11970... at 50.00%

310 12aa, >antibacterial11983... at 41.67%

311 15aa, >antibacterial12039... at 35.00%

312 15aa, >antibacterial12045... at 35.00%

313 14aa, >antibacterial12075... at 42.86%

314 14aa, >antibacterial12078... at 57.14%

315 14aa, >antibacterial12084... at 57.14%

316 14aa, >antibacterial12089... at 50.00%

317 17aa, >antibacterial12123... at 41.18%

318 19aa, >antibacterial12133... at 47.37%

319 20aa, >antibacterial12142... at 35.00%

320 13aa, >antibacterial12148... at 46.15%

321 21aa, >antibacterial12167... at 42.86%

322 25aa, >antibacterial12182... at 35.00%

323 17aa, >antibacterial12186... at 47.06%

324 13aa, >antibacterial12239... at 46.15%

325 13aa, >antibacterial12241... at 46.15%

326 13aa, >antibacterial12242... at 46.15%

327 13aa, >antibacterial12245... at 46.15%

328 12aa, >antibacterial12366... at 41.67%

329 11aa, >antibacterial12400... at 45.45%

330 15aa, >antibacterial12420... at 35.00%

331 15aa, >antibacterial12421... at 35.00%

332 15aa, >antibacterial12428... at 46.67%

333 15aa, >antibacterial12429... at 46.67%

334 15aa, >antibacterial12456... at 35.00%

335 12aa, >antibacterial12459... at 41.67%  
 336 20aa, >antibacterial12493... at 50.00%  
 337 15aa, >antibacterial12511... at 35.00%  
 338 16aa, >antibacterial12543... at 43.75%  
 339 12aa, >antibacterial12565... at 41.67%  
 340 12aa, >antibacterial12568... at 50.00%  
 341 12aa, >antibacterial12571... at 41.67%  
 342 15aa, >antibacterial12580... at 35.00%  
 343 15aa, >antibacterial12582... at 46.67%  
 344 15aa, >antibacterial12601... at 35.00%  
 345 11aa, >antibacterial12648... at 45.45%  
 346 12aa, >antibacterial12649... at 50.00%  
 347 12aa, >antibacterial12693... at 50.00%  
 348 15aa, >antibacterial12709... at 35.00%  
 349 15aa, >antibacterial12722... at 35.00%  
 350 15aa, >antibacterial12790... at 35.00%  
 351 15aa, >antibacterial12794... at 46.67%  
 352 15aa, >antibacterial12803... at 53.33%  
 353 18aa, >antibacterial12822... at 44.44%  
 354 20aa, >antibacterial12940... at 50.00%  
 355 20aa, >antibacterial12956... at 55.00%  
 356 20aa, >antibacterial12961... at 50.00%  
 357 12aa, >antibacterial12966... at 41.67%  
 358 15aa, >antibacterial13077... at 35.00%  
 359 29aa, >antibacterial13106... at 41.38%  
 360 12aa, >antibacterial13113... at 41.67%  
 361 12aa, >antibacterial13120... at 41.67%  
 362 12aa, >antibacterial13154... at 50.00%  
 363 13aa, >antibacterial13203... at 53.85%  
 364 12aa, >antibacterial13206... at 41.67%  
 365 15aa, >antibacterial13215... at 35.00%  
 366 14aa, >antibacterial13255... at 42.86%  
 367 15aa, >antibacterial13261... at 35.00%  
 368 11aa, >antibacterial13272... at 45.45%  
 369 11aa, >antibacterial13316... at 54.55%  
 370 13aa, >antibacterial13343... at 46.15%  
 371 11aa, >antibacterial13346... \*  
 372 11aa, >antibacterial13353... at 54.55%  
 373 12aa, >antibacterial13358... at 41.67%  
 374 22aa, >antibacterial13416... at 50.00%

>Cluster 2

0 20aa, >anti-Gram+;antibact... at 35.00%  
 1 12aa, >Antibacterial... at 41.67%  
 2 12aa, >antibacterial... at 50.00%  
 3 18aa, >Antibacterial;Antif... at 50.00%  
 4 17aa, >Antifungal... at 47.06%  
 5 11aa, >anti-Gram+;antibact... at 54.55%  
 6 29aa, >antibacterial;antim... at 41.38%  
 7 19aa, >Antibacterial... at 42.11%  
 8 20aa, >antibacterial;antif... at 35.00%  
 9 11aa, >anti-Gram+;Antimicr... at 45.45%  
 10 11aa, >anti-Gram+;Antimicr... at 45.45%  
 11 15aa, >Antifungal... at 35.00%  
 12 11aa, >Antibacterial... at 45.45%



13 15aa, >anti-Gram+;Antibact... \*

14 14aa, >Antiviral... at 42.86%

15 15aa, >antimicrobial... at 35.00%

16 20aa, >antimicrobial... at 35.00%

17 15aa, >antimicrobial... at 35.00%

18 14aa, >antimicrobial... at 42.86%

19 20aa, >antimicrobial... at 45.00%

20 24aa, >anti-Gram+;antibact... at 41.67%

21 13aa, >antibacterial;Antif... at 46.15%

22 24aa, >anti-Gram+;antibact... at 41.67%

23 16aa, >anti-Gram+;antibact... at 43.75%

24 13aa, >anti-Gram+;antibact... \*

25 13aa, >antibacterial;Antif... at 53.85%

26 23aa, >antibacterial;antim... at 43.48%

27 14aa, >Antimicrobial... at 42.86%

28 12aa, >anti-Gram+;antibact... at 41.67%

29 17aa, >antimicrobial... at 47.06%

30 24aa, >antibacterial;Antif... at 41.67%

31 20aa, >antimicrobial... at 35.00%

32 33aa, >anti-Gram+;antibact... at 42.42%

33 24aa, >anti-Gram+;antibact... at 41.67%

34 11aa, >anti-Gram-;antimicr... at 45.45%

35 19aa, >Anti-Gram-... at 47.37%

36 25aa, >Antimicrobial... at 35.00%

37 14aa, >anti-Gram+;antibact... at 42.86%

38 32aa, >antibacterial;Antif... at 40.62%

39 12aa, >Antifungal;Antimicr... at 41.67%

40 17aa, >Antibacterial;antim... at 52.94%

41 17aa, >anti-Gram+;Antibact... at 41.18%

42 24aa, >antibacterial;antim... at 45.83%

43 19aa, >anti-Gram-;Antibact... at 42.11%

44 27aa, >antimicrobial... at 40.74%

45 16aa, >antibacterial... at 50.00%

46 11aa, >Antibacterial;antim... at 54.55%

47 12aa, >Antibacterial;Antif... at 41.67%

48 28aa, >antibacterial;antim... at 42.86%

49 22aa, >antimicrobial... at 40.91%

50 22aa, >Antibacterial;antim... at 54.55%

51 22aa, >anti-Gram-;Antibact... at 50.00%

52 11aa, >membrane... at 45.45%

53 19aa, >anti-Gram+;Antibact... at 42.11%

54 15aa, >Antimicrobial... at 35.00%

55 15aa, >anti-Gram+;antibact... at 35.00%

56 15aa, >anti-Gram+;antibact... at 46.67%

57 12aa, >antimicrobial... at 41.67%

58 13aa, >antibacterial;antim... at 46.15%

59 20aa, >anti-Gram+;Antibact... at 60.00%

60 13aa, >anti-Gram+;antibact... at 53.85%

61 14aa, >anti-Gram+;antibact... at 57.14%

62 15aa, >anti-Gram+;Antibact... at 35.00%

63 21aa, >Antimicrobial;Gram-... at 47.62%

64 11aa, >antibacterial;antim... at 45.45%

65 13aa, >antibacterial;antim... at 46.15%

66 12aa, >Anti-Gram-... at 58.33%

67 16aa, >antimicrobial... at 50.00%  
68 11aa, >Antimicrobial... at 45.45%  
69 12aa, >antifungal... at 41.67%  
70 12aa, >antifungal... at 41.67%  
71 12aa, >antifungal... at 41.67%  
72 11aa, >anti-Gram+;Antimicr... at 45.45%  
73 17aa, >Antibacterial... at 47.06%  
74 11aa, >antibacterial... at 45.45%  
75 12aa, >antibacterial... at 41.67%  
76 15aa, >Antibacterial... at 46.67%  
77 15aa, >Antifungal;Antimicr... at 35.00%  
78 15aa, >Antifungal;Antimicr... at 46.67%  
79 15aa, >Antibacterial... \*  
80 20aa, >Gram-... at 35.00%  
81 12aa, >antifungal... at 41.67%  
82 19aa, >antibacterial;Antif... at 42.11%  
83 17aa, >anti-Gram+;antibact... at 41.18%  
84 13aa, >antimicrobial... at 53.85%  
85 11aa, >antimicrobial... at 72.73%  
86 14aa, >antibacterial... at 57.14%  
87 618aa, >Antimicrobial... \*  
88 13aa, >antibacterial;antim... at 46.15%  
89 14aa, >antimicrobial... at 42.86%  
90 11aa, >antibacterial... at 45.45%  
91 18aa, >Antimicrobial... at 50.00%  
92 15aa, >Antifungal... at 46.67%  
93 25aa, >Antifungal... at 35.00%  
94 19aa, >anti-Gram-... at 42.11%  
95 205aa, >Antimicrobial... at 40.49%  
96 30aa, >antibacterial;antim... at 35.00%  
97 16aa, >antimicrobial... at 43.75%  
98 15aa, >Antifungal... at 46.67%  
99 15aa, >anti-Gram-;antibact... at 35.00%  
100 14aa, >antimicrobial... at 42.86%  
101 14aa, >anti-Gram-;antifung... at 42.86%  
102 11aa, >antimicrobial... at 63.64%  
103 14aa, >antimicrobial... at 50.00%  
104 15aa, >Antifungal;Antimicr... at 35.00%  
105 15aa, >anti-Gram+;Gram-... at 35.00%  
106 12aa, >antibacterial... at 41.67%  
107 13aa, >antibacterial06462... at 46.15%  
108 23aa, >antibacterial06552... at 43.48%  
109 13aa, >antibacterial06561... at 46.15%  
110 20aa, >antibacterial06562... at 35.00%  
111 28aa, >antibacterial06626... at 42.86%  
112 25aa, >antibacterial06641... at 52.00%  
113 14aa, >antibacterial07042... at 42.86%  
114 13aa, >antibacterial07388... at 53.85%  
115 17aa, >antibacterial07444... at 41.18%  
116 11aa, >antibacterial07504... at 45.45%  
117 25aa, >antibacterial07560... at 35.00%  
118 25aa, >antibacterial07561... at 35.00%  
119 12aa, >antibacterial07613... at 41.67%  
120 20aa, >antibacterial07626... at 35.00%

121 20aa, >antibacterial07627... at 35.00%  
122 20aa, >antibacterial07628... at 35.00%  
123 20aa, >antibacterial07629... at 35.00%  
124 20aa, >antibacterial07630... at 35.00%  
125 20aa, >antibacterial07636... at 35.00%  
126 20aa, >antibacterial07637... at 35.00%  
127 20aa, >antibacterial07638... at 35.00%  
128 20aa, >antibacterial07674... at 35.00%  
129 14aa, >antibacterial07678... at 50.00%  
130 17aa, >antibacterial07699... at 47.06%  
131 24aa, >antibacterial07704... at 41.67%  
132 11aa, >antibacterial07706... at 45.45%  
133 14aa, >antibacterial07707... at 42.86%  
134 12aa, >antibacterial07708... at 41.67%  
135 11aa, >antibacterial07729... at 45.45%  
136 11aa, >antibacterial07734... at 45.45%  
137 14aa, >antibacterial07766... at 50.00%  
138 14aa, >antibacterial07767... at 50.00%  
139 26aa, >antibacterial07781... at 42.31%  
140 26aa, >antibacterial07782... at 42.31%  
141 26aa, >antibacterial07786... at 42.31%  
142 14aa, >antibacterial07821... at 42.86%  
143 14aa, >antibacterial07842... at 42.86%  
144 14aa, >antibacterial07843... at 50.00%  
145 13aa, >antibacterial07926... at 46.15%  
146 16aa, >antibacterial07936... at 43.75%  
147 18aa, >antibacterial07963... at 50.00%  
148 18aa, >antibacterial07968... at 50.00%  
149 12aa, >antibacterial07998... at 41.67%  
150 12aa, >antibacterial07999... at 50.00%  
151 12aa, >antibacterial08000... at 50.00%  
152 20aa, >antibacterial08042... at 35.00%  
153 23aa, >antibacterial08096... at 43.48%  
154 12aa, >antibacterial08115... at 41.67%  
155 13aa, >antibacterial08151... at 46.15%  
156 13aa, >antibacterial08164... at 53.85%  
157 13aa, >antibacterial08167... at 46.15%  
158 13aa, >antibacterial08169... at 46.15%  
159 11aa, >antibacterial08230... at 45.45%  
160 13aa, >antibacterial08348... at 46.15%  
161 17aa, >antibacterial08378... at 41.18%  
162 13aa, >antibacterial08417... at 46.15%  
163 14aa, >antibacterial08450... at 42.86%  
164 14aa, >antibacterial08469... at 42.86%  
165 14aa, >antibacterial08471... \*  
166 20aa, >antibacterial08484... at 35.00%  
167 12aa, >antibacterial08486... at 41.67%  
168 19aa, >antibacterial08541... at 47.37%  
169 14aa, >antibacterial08550... at 42.86%  
170 12aa, >antibacterial08589... at 41.67%  
171 15aa, >antibacterial08601... at 35.00%  
172 14aa, >antibacterial08603... at 50.00%  
173 14aa, >antibacterial08612... at 50.00%  
174 15aa, >antibacterial08647... at 35.00%

175 15aa, >antibacterial08649... at 46.67%  
176 15aa, >antibacterial08650... at 53.33%  
177 19aa, >antibacterial08653... at 42.11%  
178 19aa, >antibacterial08664... at 42.11%  
179 19aa, >antibacterial08667... at 47.37%  
180 15aa, >antibacterial08691... at 46.67%  
181 15aa, >antibacterial08693... at 35.00%  
182 15aa, >antibacterial08694... at 53.33%  
183 15aa, >antibacterial08695... at 35.00%  
184 15aa, >antibacterial08700... at 35.00%  
185 15aa, >antibacterial08701... at 35.00%  
186 13aa, >antibacterial08704... at 69.23%  
187 20aa, >antibacterial08715... at 45.00%  
188 14aa, >antibacterial08734... at 42.86%  
189 15aa, >antibacterial08744... at 35.00%  
190 11aa, >antibacterial08750... at 45.45%  
191 15aa, >antibacterial08813... at 35.00%  
192 15aa, >antibacterial08814... at 35.00%  
193 15aa, >antibacterial08815... at 35.00%  
194 15aa, >antibacterial08820... at 35.00%  
195 13aa, >antibacterial08834... at 46.15%  
196 19aa, >antibacterial08872... at 42.11%  
197 19aa, >antibacterial08875... \*  
198 13aa, >antibacterial08902... at 46.15%  
199 21aa, >antibacterial08911... at 52.38%  
200 18aa, >antibacterial08913... at 44.44%  
201 18aa, >antibacterial08941... at 44.44%  
202 18aa, >antibacterial08944... at 44.44%  
203 12aa, >antibacterial08950... at 41.67%  
204 12aa, >antibacterial08953... at 41.67%  
205 12aa, >antibacterial08959... at 41.67%  
206 12aa, >antibacterial08960... at 50.00%  
207 12aa, >antibacterial08968... at 41.67%  
208 23aa, >antibacterial08974... at 43.48%  
209 19aa, >antibacterial08977... at 42.11%  
210 20aa, >antibacterial08979... at 45.00%  
211 14aa, >antibacterial08996... at 42.86%  
212 12aa, >antibacterial09031... at 41.67%  
213 12aa, >antibacterial09051... at 50.00%  
214 15aa, >antibacterial09063... at 35.00%  
215 22aa, >antibacterial09064... at 40.91%  
216 14aa, >antibacterial09074... at 42.86%  
217 14aa, >antibacterial09077... at 42.86%  
218 18aa, >antibacterial09160... at 44.44%  
219 18aa, >antibacterial09161... at 44.44%  
220 15aa, >antibacterial09277... at 35.00%  
221 19aa, >antibacterial09307... at 52.63%  
222 11aa, >antibacterial09313... at 63.64%  
223 18aa, >antibacterial09340... at 50.00%  
224 12aa, >antibacterial09341... at 41.67%  
225 11aa, >antibacterial09363... at 45.45%  
226 20aa, >antibacterial09380... at 45.00%  
227 11aa, >antibacterial09381... at 54.55%  
228 14aa, >antibacterial09424... at 42.86%

229 14aa, >antibacterial09446... at 42.86%  
230 20aa, >antibacterial09463... at 35.00%  
231 20aa, >antibacterial09489... at 35.00%  
232 17aa, >antibacterial09522... at 41.18%  
233 25aa, >antibacterial09562... at 48.00%  
234 25aa, >antibacterial09563... at 48.00%  
235 25aa, >antibacterial09564... at 48.00%  
236 25aa, >antibacterial09565... at 48.00%  
237 25aa, >antibacterial09566... at 48.00%  
238 25aa, >antibacterial09567... at 48.00%  
239 25aa, >antibacterial09568... at 48.00%  
240 25aa, >antibacterial09570... at 52.00%  
241 25aa, >antibacterial09571... at 48.00%  
242 25aa, >antibacterial09572... at 48.00%  
243 25aa, >antibacterial09578... at 48.00%  
244 13aa, >antibacterial09591... at 46.15%  
245 11aa, >antibacterial09627... at 45.45%  
246 13aa, >antibacterial09727... at 69.23%  
247 13aa, >antibacterial09731... at 61.54%  
248 15aa, >antibacterial09735... at 46.67%  
249 15aa, >antibacterial09767... at 35.00%  
250 12aa, >antibacterial09782... at 41.67%  
251 12aa, >antibacterial09791... at 41.67%  
252 13aa, >antibacterial09857... at 46.15%  
253 19aa, >antibacterial09906... at 47.37%  
254 11aa, >antibacterial09911... at 54.55%  
255 20aa, >antibacterial09930... at 45.00%  
256 12aa, >antibacterial09971... at 41.67%  
257 12aa, >antibacterial09993... at 50.00%  
258 12aa, >antibacterial10015... at 41.67%  
259 12aa, >antibacterial10020... at 50.00%  
260 12aa, >antibacterial10021... at 50.00%  
261 12aa, >antibacterial10022... at 50.00%  
262 20aa, >antibacterial10039... at 45.00%  
263 13aa, >antibacterial10053... at 46.15%  
264 12aa, >antibacterial10059... at 50.00%  
265 21aa, >antibacterial10083... at 57.14%  
266 21aa, >antibacterial10084... at 47.62%  
267 12aa, >antibacterial10141... at 50.00%  
268 12aa, >antibacterial10180... at 58.33%  
269 12aa, >antibacterial10181... at 41.67%  
270 12aa, >antibacterial10182... at 41.67%  
271 14aa, >antibacterial10193... at 42.86%  
272 16aa, >antibacterial10219... \*  
273 17aa, >antibacterial10224... at 47.06%  
274 12aa, >antibacterial10233... at 41.67%  
275 18aa, >antibacterial10268... at 44.44%  
276 21aa, >antibacterial10326... at 42.86%  
277 24aa, >antibacterial10370... at 41.67%  
278 17aa, >antibacterial10381... at 41.18%  
279 17aa, >antibacterial10407... at 52.94%  
280 16aa, >antibacterial10410... at 50.00%  
281 13aa, >antibacterial10413... at 46.15%  
282 15aa, >antibacterial10419... at 35.00%

283 15aa, >antibacterial110420... at 35.00%  
284 15aa, >antibacterial110422... at 35.00%  
285 13aa, >antibacterial110485... at 46.15%  
286 17aa, >antibacterial110507... at 41.18%  
287 15aa, >antibacterial110519... at 35.00%  
288 28aa, >antibacterial110524... at 42.86%  
289 12aa, >antibacterial110526... at 50.00%  
290 12aa, >antibacterial110532... at 41.67%  
291 12aa, >antibacterial110533... at 50.00%  
292 11aa, >antibacterial110552... at 45.45%  
293 11aa, >antibacterial110562... at 54.55%  
294 11aa, >antibacterial110597... at 45.45%  
295 13aa, >antibacterial110647... at 46.15%  
296 14aa, >antibacterial110648... at 42.86%  
297 12aa, >antibacterial110656... at 41.67%  
298 12aa, >antibacterial110697... at 41.67%  
299 11aa, >antibacterial110778... at 45.45%  
300 11aa, >antibacterial110779... at 45.45%  
301 11aa, >antibacterial110780... at 45.45%  
302 11aa, >antibacterial110781... at 45.45%  
303 14aa, >antibacterial110868... at 42.86%  
304 34aa, >antibacterial110896... \*  
305 15aa, >antibacterial110907... at 46.67%  
306 13aa, >antibacterial111108... at 46.15%  
307 15aa, >antibacterial111133... at 35.00%  
308 15aa, >antibacterial111157... at 46.67%  
309 12aa, >antibacterial111162... at 41.67%  
310 15aa, >antibacterial111180... at 53.33%  
311 11aa, >antibacterial111185... at 45.45%  
312 15aa, >antibacterial111187... at 35.00%  
313 12aa, >antibacterial111219... at 50.00%  
314 12aa, >antibacterial111245... at 41.67%  
315 14aa, >antibacterial111251... at 57.14%  
316 15aa, >antibacterial111268... at 35.00%  
317 14aa, >antibacterial111278... \*  
318 15aa, >antibacterial111298... at 35.00%  
319 18aa, >antibacterial111331... at 44.44%  
320 11aa, >antibacterial111332... at 45.45%  
321 11aa, >antibacterial111335... at 45.45%  
322 11aa, >antibacterial111336... at 45.45%  
323 11aa, >antibacterial111337... at 45.45%  
324 13aa, >antibacterial111338... at 53.85%  
325 12aa, >antibacterial111340... at 50.00%  
326 18aa, >antibacterial111344... at 44.44%  
327 15aa, >antibacterial111360... at 35.00%  
328 23aa, >antibacterial111371... at 43.48%  
329 35aa, >antibacterial111379... at 42.86%  
330 15aa, >antibacterial111472... at 35.00%  
331 15aa, >antibacterial111499... at 46.67%  
332 35aa, >antibacterial111501... at 35.00%  
333 15aa, >antibacterial111506... at 35.00%  
334 12aa, >antibacterial111512... at 41.67%  
335 15aa, >antibacterial111526... at 53.33%  
336 15aa, >antibacterial111536... at 66.67%

337 20aa, >antibacterial11552... at 35.00%  
338 20aa, >antibacterial11555... at 35.00%  
339 20aa, >antibacterial11564... at 50.00%  
340 13aa, >antibacterial11572... at 46.15%  
341 18aa, >antibacterial11584... at 44.44%  
342 16aa, >antibacterial11585... at 50.00%  
343 20aa, >antibacterial11595... at 45.00%  
344 15aa, >antibacterial11602... at 35.00%  
345 19aa, >antibacterial11610... at 42.11%  
346 14aa, >antibacterial11623... at 50.00%  
347 12aa, >antibacterial11631... at 41.67%  
348 15aa, >antibacterial11642... at 35.00%  
349 18aa, >antibacterial11671... at 44.44%  
350 15aa, >antibacterial11674... at 35.00%  
351 14aa, >antibacterial11675... at 42.86%  
352 14aa, >antibacterial11676... at 42.86%  
353 15aa, >antibacterial11684... at 35.00%  
354 13aa, >antibacterial11700... at 61.54%  
355 18aa, >antibacterial11774... at 44.44%  
356 21aa, >antibacterial11787... at 42.86%  
357 15aa, >antibacterial11827... at 35.00%  
358 15aa, >antibacterial11828... at 46.67%  
359 15aa, >antibacterial11867... at 35.00%  
360 15aa, >antibacterial11869... at 35.00%  
361 15aa, >antibacterial11870... at 35.00%  
362 15aa, >antibacterial11871... at 35.00%  
363 15aa, >antibacterial11872... at 35.00%  
364 15aa, >antibacterial11882... at 35.00%  
365 12aa, >antibacterial11893... at 41.67%  
366 11aa, >antibacterial11904... at 45.45%  
367 15aa, >antibacterial11918... at 35.00%  
368 20aa, >antibacterial11977... at 35.00%  
369 35aa, >antibacterial11980... at 42.86%  
370 12aa, >antibacterial11982... at 41.67%  
371 12aa, >antibacterial11985... at 41.67%  
372 12aa, >antibacterial11986... at 41.67%  
373 22aa, >antibacterial11992... at 40.91%  
374 12aa, >antibacterial11994... at 58.33%  
375 14aa, >antibacterial12071... at 50.00%  
376 14aa, >antibacterial12080... at 50.00%  
377 14aa, >antibacterial12081... at 42.86%  
378 14aa, >antibacterial12082... at 42.86%  
379 15aa, >antibacterial12094... at 35.00%  
380 12aa, >antibacterial12106... at 50.00%  
381 12aa, >antibacterial12118... at 41.67%  
382 21aa, >antibacterial12119... at 47.62%  
383 14aa, >antibacterial12136... at 50.00%  
384 13aa, >antibacterial12143... at 46.15%  
385 25aa, >antibacterial12165... at 35.00%  
386 25aa, >antibacterial12166... at 48.00%  
387 17aa, >antibacterial12181... at 52.94%  
388 13aa, >antibacterial12203... at 53.85%  
389 13aa, >antibacterial12204... at 53.85%  
390 13aa, >antibacterial12205... at 53.85%

391 13aa, >antibacterial12206... at 53.85%  
392 13aa, >antibacterial12207... at 53.85%  
393 13aa, >antibacterial12208... at 53.85%  
394 13aa, >antibacterial12209... at 53.85%  
395 13aa, >antibacterial12210... \*  
396 13aa, >antibacterial12219... at 46.15%  
397 13aa, >antibacterial12234... at 46.15%  
398 14aa, >antibacterial12284... at 42.86%  
399 14aa, >antibacterial12287... at 42.86%  
400 12aa, >antibacterial12342... at 50.00%  
401 12aa, >antibacterial12343... at 41.67%  
402 15aa, >antibacterial12344... at 53.33%  
403 11aa, >antibacterial12351... at 45.45%  
404 18aa, >antibacterial12352... at 44.44%  
405 11aa, >antibacterial12355... at 45.45%  
406 12aa, >antibacterial12356... at 50.00%  
407 12aa, >antibacterial12357... at 50.00%  
408 12aa, >antibacterial12358... at 41.67%  
409 12aa, >antibacterial12359... at 41.67%  
410 12aa, >antibacterial12367... at 41.67%  
411 23aa, >antibacterial12370... at 43.48%  
412 13aa, >antibacterial12424... at 46.15%  
413 15aa, >antibacterial12427... at 35.00%  
414 26aa, >antibacterial12434... at 42.31%  
415 12aa, >antibacterial12446... at 41.67%  
416 11aa, >antibacterial12520... at 45.45%  
417 14aa, >antibacterial12523... at 42.86%  
418 14aa, >antibacterial12524... at 50.00%  
419 11aa, >antibacterial12530... at 54.55%  
420 15aa, >antibacterial12541... at 46.67%  
421 11aa, >antibacterial12542... at 45.45%  
422 15aa, >antibacterial12550... at 35.00%  
423 15aa, >antibacterial12551... at 35.00%  
424 15aa, >antibacterial12596... at 35.00%  
425 20aa, >antibacterial12616... at 50.00%  
426 15aa, >antibacterial12642... at 35.00%  
427 11aa, >antibacterial12681... at 54.55%  
428 13aa, >antibacterial12706... at 46.15%  
429 15aa, >antibacterial12714... at 46.67%  
430 11aa, >antibacterial12733... at 45.45%  
431 13aa, >antibacterial12735... at 46.15%  
432 29aa, >antibacterial12752... at 44.83%  
433 15aa, >antibacterial12772... at 35.00%  
434 29aa, >antibacterial12787... at 41.38%  
435 15aa, >antibacterial12804... at 35.00%  
436 20aa, >antibacterial12850... at 35.00%  
437 15aa, >antibacterial12868... at 35.00%  
438 13aa, >antibacterial12887... at 46.15%  
439 12aa, >antibacterial12909... at 50.00%  
440 12aa, >antibacterial12914... \*  
441 11aa, >antibacterial12939... at 45.45%  
442 20aa, >antibacterial12955... at 45.00%  
443 17aa, >antibacterial12974... at 41.18%  
444 18aa, >antibacterial13001... at 44.44%



```

445 15aa, >antibacterial13007... at 35.00%
446 24aa, >antibacterial13034... at 45.83%
447 18aa, >antibacterial13035... at 44.44%
448 23aa, >antibacterial13079... at 47.83%
449 15aa, >antibacterial13153... at 35.00%
450 12aa, >antibacterial13176... at 41.67%
451 11aa, >antibacterial13218... at 54.55%
452 11aa, >antibacterial13270... at 45.45%
453 11aa, >antibacterial13271... at 45.45%
454 18aa, >antibacterial13293... at 44.44%
455 20aa, >antibacterial13306... at 35.00%
456 18aa, >antibacterial13375... at 44.44%
457 18aa, >antibacterial13376... at 50.00%
458 20aa, >antibacterial13384... at 35.00%
>Cluster 3
0 19aa, >Antibacterial;Antif... at 42.11%
1 24aa, >Antibacterial... at 41.67%
2 28aa, >Antimicrobial... at 42.86%
3 28aa, >Antimicrobial... at 42.86%
4 28aa, >antibacterial;Antif... at 42.86%
5 19aa, >anti-Gram-... at 42.11%
6 23aa, >Antibacterial... at 43.48%
7 24aa, >Antifungal;Antimicr... at 41.67%
8 13aa, >antimicrobial... at 53.85%
9 13aa, >Antibacterial;antim... at 46.15%
10 13aa, >antimicrobial... at 46.15%
11 13aa, >antibacterial;antim... at 46.15%
12 13aa, >Antimicrobial... at 46.15%
13 13aa, >antibacterial;antim... at 53.85%
14 19aa, >anti-Gram+;antifung... at 42.11%
15 15aa, >antibacterial;antim... at 35.00%
16 12aa, >Antimicrobial... at 41.67%
17 19aa, >anti-Gram+;Antibact... at 47.37%
18 27aa, >Antimicrobial... at 40.74%
19 27aa, >antimicrobial... at 40.74%
20 27aa, >antimicrobial... at 40.74%
21 13aa, >Antimicrobial... at 46.15%
22 12aa, >Antibacterial... at 41.67%
23 29aa, >antibacterial;Antif... at 41.38%
24 16aa, >anti-Gram+;antibact... at 43.75%
25 17aa, >antimicrobial... at 41.18%
26 16aa, >antibacterial... at 43.75%
27 22aa, >anti-Gram-;antibact... at 40.91%
28 13aa, >antimicrobial... at 53.85%
29 24aa, >antimicrobial... at 41.67%
30 29aa, >antimicrobial... at 44.83%
31 32aa, >Anti-Gram-;antibact... at 40.62%
32 21aa, >anti-Gram+;antibact... at 42.86%
33 29aa, >antibacterial;antim... at 41.38%
34 24aa, >antibacterial;Antif... at 41.67%
35 12aa, >antithrombotic... at 41.67%
36 14aa, >Antibacterial... at 50.00%
37 28aa, >anti-Gram+;antibact... at 42.86%
38 13aa, >anti-Gram+;antibact... at 46.15%

```

39 25aa, >anti-Gram+;antifung... at 48.00%  
40 18aa, >anti-Gram+;Gram-... at 50.00%  
41 15aa, >Antifungal;Antimicr... at 35.00%  
42 17aa, >antimicrobial... at 47.06%  
43 15aa, >Antibacterial... at 46.67%  
44 14aa, >Antimicrobial... at 50.00%  
45 14aa, >antibacterial... at 42.86%  
46 19aa, >antibacterial;Antif... at 42.11%  
47 14aa, >anti-Gram+;antibact... at 42.86%  
48 11aa, >Antimicrobial... at 54.55%  
49 490aa, >Antimicrobial... \*  
50 255aa, >Antimicrobial... at 43.14%  
51 255aa, >Antimicrobial... at 52.16%  
52 255aa, >Antimicrobial... \*  
53 21aa, >Antibacterial... at 42.86%  
54 18aa, >Antimicrobial... at 44.44%  
55 13aa, >anti-Gram+;antibact... at 46.15%  
56 17aa, >antimicrobial... at 41.18%  
57 21aa, >Antibacterial... at 47.62%  
58 12aa, >Antibacterial... at 41.67%  
59 20aa, >antibacterial06572... at 45.00%  
60 16aa, >antibacterial06589... at 43.75%  
61 20aa, >antibacterial06707... at 55.00%  
62 20aa, >antibacterial06767... at 45.00%  
63 14aa, >antibacterial07041... at 50.00%  
64 26aa, >antibacterial07062... at 42.31%  
65 30aa, >antibacterial07352... at 46.67%  
66 12aa, >antibacterial07370... at 41.67%  
67 12aa, >antibacterial07551... at 41.67%  
68 14aa, >antibacterial07589... at 42.86%  
69 11aa, >antibacterial07662... at 54.55%  
70 20aa, >antibacterial07663... at 35.00%  
71 11aa, >antibacterial07714... at 45.45%  
72 26aa, >antibacterial07788... at 42.31%  
73 21aa, >antibacterial07930... at 42.86%  
74 14aa, >antibacterial07987... at 42.86%  
75 20aa, >antibacterial08038... at 35.00%  
76 18aa, >antibacterial08077... at 44.44%  
77 13aa, >antibacterial08082... at 46.15%  
78 11aa, >antibacterial08107... at 45.45%  
79 11aa, >antibacterial08108... at 45.45%  
80 13aa, >antibacterial08146... at 46.15%  
81 13aa, >antibacterial08188... at 46.15%  
82 18aa, >antibacterial08195... at 50.00%  
83 18aa, >antibacterial08234... at 55.56%  
84 12aa, >antibacterial08304... at 41.67%  
85 12aa, >antibacterial08343... at 58.33%  
86 22aa, >antibacterial08434... at 45.45%  
87 14aa, >antibacterial08444... at 42.86%  
88 20aa, >antibacterial08480... at 35.00%  
89 20aa, >antibacterial08483... at 55.00%  
90 20aa, >antibacterial08485... at 35.00%  
91 12aa, >antibacterial08504... at 41.67%  
92 15aa, >antibacterial08609... at 46.67%

|     |       |                        |    |        |
|-----|-------|------------------------|----|--------|
| 93  | 14aa, | >antibacterial08634... | at | 42.86% |
| 94  | 14aa, | >antibacterial08635... | at | 42.86% |
| 95  | 15aa, | >antibacterial08687... | at | 35.00% |
| 96  | 15aa, | >antibacterial08697... | at | 35.00% |
| 97  | 11aa, | >antibacterial08753... | at | 45.45% |
| 98  | 15aa, | >antibacterial08862... | at | 35.00% |
| 99  | 15aa, | >antibacterial08863... | at | 35.00% |
| 100 | 22aa, | >antibacterial08880... | at | 40.91% |
| 101 | 13aa, | >antibacterial08898... | at | 46.15% |
| 102 | 14aa, | >antibacterial08999... | at | 57.14% |
| 103 | 12aa, | >antibacterial09018... | at | 41.67% |
| 104 | 22aa, | >antibacterial09048... | at | 40.91% |
| 105 | 20aa, | >antibacterial09091... | at | 35.00% |
| 106 | 13aa, | >antibacterial09139... | at | 46.15% |
| 107 | 21aa, | >antibacterial09234... | at | 42.86% |
| 108 | 12aa, | >antibacterial09252... | at | 41.67% |
| 109 | 12aa, | >antibacterial09254... | at | 41.67% |
| 110 | 15aa, | >antibacterial09266... | at | 35.00% |
| 111 | 12aa, | >antibacterial09306... | at | 41.67% |
| 112 | 11aa, | >antibacterial09322... | at | 45.45% |
| 113 | 11aa, | >antibacterial09323... | at | 45.45% |
| 114 | 11aa, | >antibacterial09324... | at | 54.55% |
| 115 | 20aa, | >antibacterial09403... | at | 45.00% |
| 116 | 20aa, | >antibacterial09408... | at | 35.00% |
| 117 | 20aa, | >antibacterial09449... | at | 35.00% |
| 118 | 12aa, | >antibacterial09502... | at | 41.67% |
| 119 | 18aa, | >antibacterial09542... | at | 44.44% |
| 120 | 18aa, | >antibacterial09717... | at | 44.44% |
| 121 | 14aa, | >antibacterial09744... | at | 50.00% |
| 122 | 17aa, | >antibacterial09745... | at | 41.18% |
| 123 | 14aa, | >antibacterial09856... | at | 42.86% |
| 124 | 13aa, | >antibacterial09865... | at | 61.54% |
| 125 | 20aa, | >antibacterial09994... | at | 35.00% |
| 126 | 12aa, | >antibacterial09999... | at | 41.67% |
| 127 | 12aa, | >antibacterial10016... | at | 41.67% |
| 128 | 12aa, | >antibacterial10017... | at | 41.67% |
| 129 | 14aa, | >antibacterial10192... | at | 42.86% |
| 130 | 13aa, | >antibacterial10212... | at | 53.85% |
| 131 | 17aa, | >antibacterial10215... | at | 52.94% |
| 132 | 14aa, | >antibacterial10269... | at | 42.86% |
| 133 | 19aa, | >antibacterial10312... | at | 42.11% |
| 134 | 13aa, | >antibacterial10344... | at | 46.15% |
| 135 | 13aa, | >antibacterial10345... | at | 46.15% |
| 136 | 13aa, | >antibacterial10375... | at | 46.15% |
| 137 | 26aa, | >antibacterial10450... | at | 42.31% |
| 138 | 12aa, | >antibacterial10541... | at | 50.00% |
| 139 | 13aa, | >antibacterial10544... | at | 53.85% |
| 140 | 31aa, | >antibacterial10568... | at | 41.94% |
| 141 | 14aa, | >antibacterial10646... | at | 50.00% |
| 142 | 20aa, | >antibacterial10676... | at | 35.00% |
| 143 | 13aa, | >antibacterial10691... | at | 53.85% |
| 144 | 17aa, | >antibacterial10707... | at | 41.18% |
| 145 | 17aa, | >antibacterial10708... | at | 41.18% |
| 146 | 14aa, | >antibacterial10860... | at | 42.86% |

|     |       |                         |    |        |
|-----|-------|-------------------------|----|--------|
| 147 | 20aa, | >antibacterial110917... | at | 50.00% |
| 148 | 20aa, | >antibacterial110919... | at | 55.00% |
| 149 | 20aa, | >antibacterial110920... | at | 45.00% |
| 150 | 20aa, | >antibacterial110921... | at | 50.00% |
| 151 | 20aa, | >antibacterial110925... | at | 60.00% |
| 152 | 20aa, | >antibacterial110926... | at | 60.00% |
| 153 | 20aa, | >antibacterial110927... | at | 45.00% |
| 154 | 20aa, | >antibacterial110928... | at | 45.00% |
| 155 | 20aa, | >antibacterial110929... | at | 35.00% |
| 156 | 20aa, | >antibacterial110930... | at | 45.00% |
| 157 | 20aa, | >antibacterial110931... | at | 50.00% |
| 158 | 13aa, | >antibacterial111132... | at | 53.85% |
| 159 | 12aa, | >antibacterial111149... | at | 41.67% |
| 160 | 12aa, | >antibacterial111171... | at | 50.00% |
| 161 | 12aa, | >antibacterial111173... | at | 50.00% |
| 162 | 19aa, | >antibacterial111194... | at | 47.37% |
| 163 | 15aa, | >antibacterial111255... | at | 53.33% |
| 164 | 16aa, | >antibacterial111280... | at | 43.75% |
| 165 | 20aa, | >antibacterial111285... | at | 50.00% |
| 166 | 15aa, | >antibacterial111346... | at | 35.00% |
| 167 | 15aa, | >antibacterial111355... | at | 35.00% |
| 168 | 23aa, | >antibacterial111406... | at | 47.83% |
| 169 | 12aa, | >antibacterial111476... | at | 50.00% |
| 170 | 14aa, | >antibacterial111482... | at | 50.00% |
| 171 | 16aa, | >antibacterial111556... | at | 43.75% |
| 172 | 18aa, | >antibacterial111558... | at | 50.00% |
| 173 | 18aa, | >antibacterial111559... | at | 44.44% |
| 174 | 18aa, | >antibacterial111591... | at | 44.44% |
| 175 | 11aa, | >antibacterial111607... | at | 45.45% |
| 176 | 11aa, | >antibacterial111608... | at | 54.55% |
| 177 | 21aa, | >antibacterial111686... | at | 42.86% |
| 178 | 20aa, | >antibacterial111748... | at | 35.00% |
| 179 | 14aa, | >antibacterial111770... | at | 42.86% |
| 180 | 15aa, | >antibacterial111785... | at | 46.67% |
| 181 | 26aa, | >antibacterial111796... | at | 50.00% |
| 182 | 15aa, | >antibacterial111854... | at | 35.00% |
| 183 | 25aa, | >antibacterial111944... | at | 44.00% |
| 184 | 14aa, | >antibacterial112003... | at | 50.00% |
| 185 | 13aa, | >antibacterial112012... | at | 46.15% |
| 186 | 18aa, | >antibacterial112028... | at | 44.44% |
| 187 | 20aa, | >antibacterial112029... | at | 35.00% |
| 188 | 13aa, | >antibacterial112147... | at | 46.15% |
| 189 | 17aa, | >antibacterial112175... | at | 52.94% |
| 190 | 17aa, | >antibacterial112183... | at | 41.18% |
| 191 | 17aa, | >antibacterial112185... | at | 41.18% |
| 192 | 17aa, | >antibacterial112187... | at | 41.18% |
| 193 | 17aa, | >antibacterial112192... | at | 41.18% |
| 194 | 27aa, | >antibacterial112375... | at | 40.74% |
| 195 | 12aa, | >antibacterial112410... | at | 41.67% |
| 196 | 15aa, | >antibacterial112431... | at | 35.00% |
| 197 | 12aa, | >antibacterial112454... | at | 41.67% |
| 198 | 12aa, | >antibacterial112458... | at | 41.67% |
| 199 | 15aa, | >antibacterial112518... | at | 35.00% |
| 200 | 11aa, | >antibacterial112522... | at | 45.45% |

```

201 18aa, >antibacterial12537... at 50.00%
202 11aa, >antibacterial12547... at 45.45%
203 31aa, >antibacterial12559... at 41.94%
204 12aa, >antibacterial12560... at 41.67%
205 12aa, >antibacterial12566... at 41.67%
206 15aa, >antibacterial12586... at 35.00%
207 20aa, >antibacterial12705... at 35.00%
208 20aa, >antibacterial12719... at 35.00%
209 12aa, >antibacterial12736... at 41.67%
210 20aa, >antibacterial12761... at 35.00%
211 12aa, >antibacterial12926... at 41.67%
212 12aa, >antibacterial12949... at 41.67%
213 20aa, >antibacterial12957... at 35.00%
214 14aa, >antibacterial12964... at 42.86%
215 17aa, >antibacterial12973... at 41.18%
216 18aa, >antibacterial13100... at 44.44%
217 18aa, >antibacterial13101... at 44.44%
218 15aa, >antibacterial13249... at 46.67%
219 12aa, >antibacterial13276... at 41.67%
220 15aa, >antibacterial13301... at 35.00%
221 12aa, >antibacterial13369... at 41.67%
222 18aa, >antibacterial13377... at 50.00%
223 12aa, >antibacterial13401... at 41.67%
224 12aa, >antibacterial13402... at 41.67%
>Cluster 4
0 11aa, >antithrombotic... at 45.45%
1 28aa, >Antibacterial;antim... at 50.00%
2 13aa, >antimicrobial... *
3 11aa, >antibacterial;antim... at 45.45%
4 11aa, >Antibacterial... at 45.45%
5 13aa, >antimicrobial... at 46.15%
6 17aa, >antimicrobial... at 41.18%
7 15aa, >Antibacterial... at 35.00%
8 14aa, >Antibacterial;antim... at 42.86%
9 13aa, >Antimicrobial... at 46.15%
10 11aa, >antimicrobial... at 45.45%
11 14aa, >anti-Gram+;Antibact... at 42.86%
12 13aa, >anti-Gram+;antibact... at 46.15%
13 13aa, >anti-Gram+;antibact... at 46.15%
14 13aa, >antimicrobial... at 46.15%
15 25aa, >Antibacterial;Antif... at 35.00%
16 33aa, >antimicrobial... at 42.42%
17 21aa, >antimicrobial... at 47.62%
18 21aa, >anti-Gram+;Antibact... at 42.86%
19 21aa, >antimicrobial... at 47.62%
20 16aa, >antibacterial... at 43.75%
21 20aa, >anti-Gram+;antibact... at 35.00%
22 21aa, >antibacterial... at 42.86%
23 14aa, >Antibacterial;Antim... at 42.86%
24 13aa, >antimicrobial... at 46.15%
25 11aa, >antithrombotic... at 45.45%
26 15aa, >antifungal;antibact... at 35.00%
27 20aa, >Antibacterial... at 35.00%
28 19aa, >Antibacterial... at 42.11%

```

29 15aa, >antibacterial... at 46.67%  
30 14aa, >antimicrobial... at 42.86%  
31 12aa, >Antimicrobial... at 41.67%  
32 359aa, >Antimicrobial... \*  
33 12aa, >antimicrobial... at 41.67%  
34 16aa, >antibacterial;antim... at 50.00%  
35 14aa, >antibacterial;antim... at 42.86%  
36 15aa, >anti-Gram-;antibact... at 35.00%  
37 12aa, >antimicrobial... at 41.67%  
38 14aa, >antimicrobial... at 50.00%  
39 14aa, >Antifungal... at 64.29%  
40 13aa, >antibacterial06526... at 46.15%  
41 13aa, >antibacterial06595... at 53.85%  
42 13aa, >antibacterial06597... at 53.85%  
43 14aa, >antibacterial07523... at 42.86%  
44 12aa, >antibacterial07580... at 41.67%  
45 19aa, >antibacterial07646... at 42.11%  
46 15aa, >antibacterial07681... at 35.00%  
47 15aa, >antibacterial07683... at 35.00%  
48 15aa, >antibacterial07684... at 35.00%  
49 15aa, >antibacterial07685... at 35.00%  
50 11aa, >antibacterial07709... at 45.45%  
51 11aa, >antibacterial07728... at 54.55%  
52 11aa, >antibacterial07731... at 45.45%  
53 12aa, >antibacterial07758... at 50.00%  
54 12aa, >antibacterial07798... at 41.67%  
55 12aa, >antibacterial07800... at 50.00%  
56 12aa, >antibacterial07820... at 41.67%  
57 20aa, >antibacterial07923... at 35.00%  
58 26aa, >antibacterial07932... at 42.31%  
59 14aa, >antibacterial07986... at 42.86%  
60 14aa, >antibacterial07988... \*  
61 15aa, >antibacterial08075... at 53.33%  
62 24aa, >antibacterial08259... at 41.67%  
63 11aa, >antibacterial08432... at 45.45%  
64 18aa, >antibacterial08443... at 50.00%  
65 14aa, >antibacterial08472... at 42.86%  
66 20aa, >antibacterial08478... at 35.00%  
67 17aa, >antibacterial08539... at 47.06%  
68 15aa, >antibacterial08586... at 35.00%  
69 15aa, >antibacterial08736... at 35.00%  
70 11aa, >antibacterial08752... at 45.45%  
71 11aa, >antibacterial08754... at 45.45%  
72 17aa, >antibacterial08824... at 47.06%  
73 15aa, >antibacterial08843... at 46.67%  
74 14aa, >antibacterial08855... at 50.00%  
75 18aa, >antibacterial08912... at 50.00%  
76 12aa, >antibacterial09033... at 41.67%  
77 14aa, >antibacterial09082... at 42.86%  
78 15aa, >antibacterial09103... at 35.00%  
79 14aa, >antibacterial09104... at 42.86%  
80 13aa, >antibacterial09132... at 53.85%  
81 18aa, >antibacterial09290... at 44.44%  
82 12aa, >antibacterial09342... at 41.67%

83 12aa, >antibacterial09344... at 41.67%  
84 20aa, >antibacterial09429... at 35.00%  
85 25aa, >antibacterial09537... at 35.00%  
86 25aa, >antibacterial09538... at 35.00%  
87 11aa, >antibacterial09574... at 45.45%  
88 13aa, >antibacterial09593... at 46.15%  
89 14aa, >antibacterial09634... at 42.86%  
90 19aa, >antibacterial09712... \*  
91 11aa, >antibacterial09746... at 45.45%  
92 12aa, >antibacterial09825... at 38.33%  
93 11aa, >antibacterial09887... at 45.45%  
94 11aa, >antibacterial09908... at 45.45%  
95 12aa, >antibacterial10060... at 41.67%  
96 12aa, >antibacterial10065... at 50.00%  
97 16aa, >antibacterial10079... at 50.00%  
98 16aa, >antibacterial10080... at 50.00%  
99 16aa, >antibacterial10081... at 50.00%  
100 16aa, >antibacterial10082... at 43.75%  
101 13aa, >antibacterial10115... at 46.15%  
102 15aa, >antibacterial10223... at 46.67%  
103 16aa, >antibacterial10276... at 50.00%  
104 16aa, >antibacterial10277... at 50.00%  
105 16aa, >antibacterial10278... at 50.00%  
106 16aa, >antibacterial10279... at 50.00%  
107 19aa, >antibacterial10315... at 42.11%  
108 14aa, >antibacterial10333... at 42.86%  
109 13aa, >antibacterial10353... at 53.85%  
110 16aa, >antibacterial10409... at 43.75%  
111 24aa, >antibacterial10452... at 41.67%  
112 15aa, >antibacterial10464... at 35.00%  
113 15aa, >antibacterial10518... at 35.00%  
114 15aa, >antibacterial10520... at 35.00%  
115 12aa, >antibacterial10531... at 50.00%  
116 13aa, >antibacterial10545... at 53.85%  
117 13aa, >antibacterial10546... at 53.85%  
118 13aa, >antibacterial10547... at 53.85%  
119 13aa, >antibacterial10548... at 53.85%  
120 14aa, >antibacterial10576... at 42.86%  
121 31aa, >antibacterial10612... at 41.94%  
122 30aa, >antibacterial10615... at 35.00%  
123 12aa, >antibacterial10666... at 41.67%  
124 14aa, >antibacterial10758... at 42.86%  
125 18aa, >antibacterial10881... at 50.00%  
126 14aa, >antibacterial11112... at 50.00%  
127 13aa, >antibacterial11191... at 61.54%  
128 15aa, >antibacterial11192... at 53.33%  
129 11aa, >antibacterial11206... at 45.45%  
130 11aa, >antibacterial11207... at 54.55%  
131 11aa, >antibacterial11208... at 45.45%  
132 11aa, >antibacterial11209... at 45.45%  
133 11aa, >antibacterial11211... \*  
134 11aa, >antibacterial11212... at 45.45%  
135 11aa, >antibacterial11213... at 45.45%  
136 15aa, >antibacterial11215... at 46.67%

137 15aa, >antibacterial11216... at 46.67%  
138 12aa, >antibacterial11217... at 50.00%  
139 15aa, >antibacterial11220... at 53.33%  
140 15aa, >antibacterial11221... at 46.67%  
141 15aa, >antibacterial11222... at 53.33%  
142 15aa, >antibacterial11225... at 53.33%  
143 12aa, >antibacterial11226... at 41.67%  
144 15aa, >antibacterial11228... at 46.67%  
145 14aa, >antibacterial11233... at 50.00%  
146 14aa, >antibacterial11247... at 50.00%  
147 21aa, >antibacterial11291... at 42.86%  
148 25aa, >antibacterial11326... at 35.00%  
149 20aa, >antibacterial11505... at 35.00%  
150 12aa, >antibacterial11635... at 41.67%  
151 13aa, >antibacterial11704... at 46.15%  
152 20aa, >antibacterial11716... at 35.00%  
153 12aa, >antibacterial11726... at 41.67%  
154 12aa, >antibacterial11727... at 41.67%  
155 12aa, >antibacterial11728... at 41.67%  
156 23aa, >antibacterial11826... at 43.48%  
157 12aa, >antibacterial11887... at 50.00%  
158 20aa, >antibacterial11890... at 35.00%  
159 15aa, >antibacterial11920... at 35.00%  
160 13aa, >antibacterial11943... at 43.85%  
161 15aa, >antibacterial12070... at 35.00%  
162 13aa, >antibacterial12227... at 36.15%  
163 13aa, >antibacterial12243... at 36.15%  
164 13aa, >antibacterial12325... at 36.15%  
165 11aa, >antibacterial12341... at 45.45%  
166 20aa, >antibacterial12402... at 35.00%  
167 15aa, >antibacterial12419... at 35.00%  
168 12aa, >antibacterial12561... at 41.67%  
169 14aa, >antibacterial12690... at 42.86%  
170 11aa, >antibacterial12844... at 45.45%  
171 11aa, >antibacterial12853... at 45.45%  
172 11aa, >antibacterial12857... at 54.55%  
173 15aa, >antibacterial12878... at 35.00%  
174 15aa, >antibacterial12905... at 46.67%  
175 20aa, >antibacterial12951... at 45.00%  
176 20aa, >antibacterial12952... at 45.00%  
177 20aa, >antibacterial12958... at 45.00%  
178 19aa, >antibacterial12959... at 42.11%  
179 11aa, >antibacterial12962... at 45.45%  
180 18aa, >antibacterial12965... at 44.44%  
181 15aa, >antibacterial12971... at 35.00%  
182 15aa, >antibacterial12994... at 46.67%  
183 17aa, >antibacterial13004... at 41.18%  
184 20aa, >antibacterial13038... at 35.00%  
185 20aa, >antibacterial13061... at 45.00%  
186 17aa, >antibacterial13072... at 41.18%  
187 15aa, >antibacterial13108... at 53.33%  
188 15aa, >antibacterial13183... at 35.00%  
189 15aa, >antibacterial13191... \*  
190 15aa, >antibacterial13222... at 46.67%



```
191 13aa, >antibacterial13291... at 46.15%
192 15aa, >antibacterial13370... *
>Cluster 5
0 15aa, >antimicrobial... at 35.00%
1 12aa, >antimicrobial... at 41.67%
2 13aa, >antimicrobial... at 46.15%
3 21aa, >antimicrobial... at 42.86%
4 12aa, >antimicrobial... at 41.67%
5 11aa, >anti-Gram+;Antimicr... *
6 11aa, >anti-Gram+;Antimicr... at 45.45%
7 13aa, >Antibacterial;antim... at 46.15%
8 13aa, >anti-Gram+;antibact... at 46.15%
9 22aa, >Gram-... at 40.91%
10 13aa, >antimicrobial... *
11 14aa, >anti-Gram+;antibact... at 42.86%
12 26aa, >antibacterial;antif... at 42.31%
13 19aa, >antibacterial;Antif... at 42.11%
14 26aa, >anti-Gram+;antibact... at 42.31%
15 12aa, >Antibacterial... at 50.00%
16 20aa, >antimicrobial... at 35.00%
17 21aa, >anti-Gram+;Antibact... at 42.86%
18 12aa, >Antibacterial;Antif... at 41.67%
19 21aa, >antimicrobial... at 42.86%
20 25aa, >antimicrobial... at 35.00%
21 14aa, >antimicrobial... at 50.00%
22 16aa, >anti-Gram-;antibact... at 43.75%
23 12aa, >Antibacterial... at 41.67%
24 14aa, >anti-Gram+;Antibact... at 42.86%
25 11aa, >antimicrobial... at 45.45%
26 18aa, >anti-Gram+;antibact... at 44.44%
27 333aa, >Antimicrobial... *
28 18aa, >anti-Gram+;antifung... at 44.44%
29 11aa, >anti-Gram+;antibact... at 45.45%
30 14aa, >Antifungal... at 42.86%
31 15aa, >Antifungal... at 35.00%
32 20aa, >antimicrobial... at 35.00%
33 15aa, >antibacterial... at 46.67%
34 21aa, >antimicrobial... at 42.86%
35 23aa, >antimicrobial... at 43.48%
36 21aa, >antimicrobial... at 42.86%
37 13aa, >antimicrobial... at 46.15%
38 18aa, >antibacterial06640... at 50.00%
39 14aa, >antibacterial07265... at 42.86%
40 25aa, >antibacterial07275... at 44.00%
41 18aa, >antibacterial07351... at 44.44%
42 15aa, >antibacterial07464... at 35.00%
43 15aa, >antibacterial07539... at 46.67%
44 15aa, >antibacterial07540... at 35.00%
45 20aa, >antibacterial07632... at 45.00%
46 20aa, >antibacterial07635... at 35.00%
47 15aa, >antibacterial07687... at 35.00%
48 12aa, >antibacterial07838... at 41.67%
49 11aa, >antibacterial07856... at 45.45%
50 20aa, >antibacterial07929... at 35.00%
```

51 20aa, >antibacterial07942... at 35.00%  
52 20aa, >antibacterial08041... at 45.00%  
53 19aa, >antibacterial08044... at 42.11%  
54 11aa, >antibacterial08216... at 45.45%  
55 17aa, >antibacterial08269... at 41.18%  
56 19aa, >antibacterial08424... \*  
57 19aa, >antibacterial08654... at 42.11%  
58 15aa, >antibacterial08677... at 35.00%  
59 13aa, >antibacterial08747... at 46.15%  
60 22aa, >antibacterial08761... at 45.45%  
61 22aa, >antibacterial08762... at 40.91%  
62 11aa, >antibacterial08806... at 45.45%  
63 12aa, >antibacterial09021... at 50.00%  
64 12aa, >antibacterial09041... at 41.67%  
65 12aa, >antibacterial09042... at 41.67%  
66 12aa, >antibacterial09050... at 41.67%  
67 14aa, >antibacterial09076... at 42.86%  
68 14aa, >antibacterial09083... at 42.86%  
69 14aa, >antibacterial09084... at 42.86%  
70 14aa, >antibacterial09085... at 42.86%  
71 12aa, >antibacterial09241... at 58.33%  
72 12aa, >antibacterial09243... at 58.33%  
73 15aa, >antibacterial09267... at 35.00%  
74 15aa, >antibacterial09271... at 46.67%  
75 15aa, >antibacterial09272... at 46.67%  
76 20aa, >antibacterial09433... at 35.00%  
77 14aa, >antibacterial09635... at 42.86%  
78 14aa, >antibacterial09636... at 50.00%  
79 14aa, >antibacterial09637... at 42.86%  
80 15aa, >antibacterial09646... at 46.67%  
81 12aa, >antibacterial09793... at 50.00%  
82 11aa, >antibacterial09821... at 45.45%  
83 12aa, >antibacterial10008... at 50.00%  
84 12aa, >antibacterial10009... \*  
85 12aa, >antibacterial10010... at 41.67%  
86 12aa, >antibacterial10019... at 41.67%  
87 12aa, >antibacterial10135... at 41.67%  
88 17aa, >antibacterial10178... at 41.18%  
89 12aa, >antibacterial10238... at 41.67%  
90 12aa, >antibacterial10241... at 41.67%  
91 15aa, >antibacterial10360... at 46.67%  
92 11aa, >antibacterial10500... at 45.45%  
93 11aa, >antibacterial10504... at 54.55%  
94 12aa, >antibacterial10527... at 41.67%  
95 12aa, >antibacterial10530... at 41.67%  
96 12aa, >antibacterial10539... at 50.00%  
97 29aa, >antibacterial10614... at 41.38%  
98 14aa, >antibacterial10795... at 42.86%  
99 24aa, >antibacterial11106... at 41.67%  
100 14aa, >antibacterial11252... at 50.00%  
101 15aa, >antibacterial11296... at 35.00%  
102 15aa, >antibacterial11388... at 35.00%  
103 15aa, >antibacterial11404... at 46.67%  
104 15aa, >antibacterial11538... at 35.00%

```

105 15aa, >antibacterial11582... at 35.00%
106 15aa, >antibacterial11632... at 35.00%
107 18aa, >antibacterial11640... at 44.44%
108 13aa, >antibacterial11648... at 46.15%
109 15aa, >antibacterial11667... at 35.00%
110 12aa, >antibacterial11731... at 41.67%
111 13aa, >antibacterial11743... *
112 12aa, >antibacterial11981... at 41.67%
113 15aa, >antibacterial12013... at 46.67%
114 15aa, >antibacterial12036... at 35.00%
115 18aa, >antibacterial12076... at 44.44%
116 12aa, >antibacterial12100... at 41.67%
117 13aa, >antibacterial12237... at 46.15%
118 14aa, >antibacterial12302... at 42.86%
119 14aa, >antibacterial12308... at 42.86%
120 15aa, >antibacterial12407... at 46.67%
121 11aa, >antibacterial12416... at 45.45%
122 11aa, >antibacterial12846... at 45.45%
123 11aa, >antibacterial12848... at 45.45%
124 18aa, >antibacterial12888... at 50.00%
125 17aa, >antibacterial12896... at 41.18%
126 15aa, >antibacterial12897... at 35.00%
127 13aa, >antibacterial12989... at 46.15%
128 15aa, >antibacterial13065... at 35.00%
129 15aa, >antibacterial13265... at 35.00%
130 12aa, >antibacterial13278... at 41.67%
131 12aa, >antibacterial13294... at 50.00%
132 15aa, >antibacterial13297... at 35.00%
133 11aa, >antibacterial13352... at 45.45%
>Cluster 6
0 316aa, >Antimicrobial... *
1 22aa, >Antimicrobial... at 40.91%
2 15aa, >Antibacterial... at 35.00%
3 19aa, >anti-Gram-;antibact... at 42.11%
4 20aa, >Antibacterial;antim... at 35.00%
5 13aa, >anti-Gram+;antibact... at 53.85%
6 13aa, >anti-Gram+;antibact... at 36.15%
7 13aa, >antimicrobial... at 36.15%
8 13aa, >anti-Gram+;antibact... *
9 27aa, >antimicrobial.... at 40.74%
10 27aa, >antimicrobial... at 44.44%
11 14aa, >anti-Gram+;antibact... at 50.00%
12 21aa, >antimicrobial... at 42.86%
13 14aa, >Antifungal;antimicr... at 42.86%
14 13aa, >antithrombotic... at 53.85%
15 13aa, >Antibacterial... at 36.15%
16 13aa, >Antibacterial... at 36.15%
17 13aa, >antimicrobial... at 36.15%
18 14aa, >Antimicrobial... at 42.86%
19 23aa, >anti-Gram+;antibact... at 43.48%
20 255aa, >Antimicrobial... *
21 30aa, >anti-Gram+;Antibact... at 35.00%
22 15aa, >antibacterial... at 46.67%
23 20aa, >anti-Gram+;Gram-... at 35.00%

```

```

24 15aa, >Antibacterial... at 35.00%
25 14aa, >Antibacterial... at 57.14%
26 11aa, >Antimicrobial... at 45.45%
27 20aa, >antibacterial06584... at 35.00%
28 25aa, >antibacterial07274... at 35.00%
29 20aa, >antibacterial07353... at 45.00%
30 29aa, >antibacterial07456... *
31 20aa, >antibacterial07762... at 35.00%
32 13aa, >antibacterial07772... at 46.15%
33 13aa, >antibacterial07774... at 46.15%
34 13aa, >antibacterial07775... at 46.15%
35 13aa, >antibacterial07776... at 53.85%
36 13aa, >antibacterial08175... at 46.15%
37 13aa, >antibacterial08182... at 46.15%
38 13aa, >antibacterial08183... at 46.15%
39 20aa, >antibacterial08481... at 35.00%
40 15aa, >antibacterial08595... at 35.00%
41 15aa, >antibacterial08708... at 46.67%
42 15aa, >antibacterial08810... at 46.67%
43 20aa, >antibacterial09447... at 35.00%
44 11aa, >antibacterial09469... at 45.45%
45 11aa, >antibacterial09470... at 54.55%
46 22aa, >antibacterial09617... at 40.91%
47 36aa, >antibacterial09716... *
48 15aa, >antibacterial10154... at 35.00%
49 20aa, >antibacterial10802... at 50.00%
50 15aa, >antibacterial11269... at 35.00%
51 15aa, >antibacterial11339... at 35.00%
52 15aa, >antibacterial11511... at 35.00%
53 15aa, >antibacterial11573... at 35.00%
54 20aa, >antibacterial11577... at 35.00%
55 14aa, >antibacterial11626... at 50.00%
56 11aa, >antibacterial11685... at 54.55%
57 12aa, >antibacterial11721... at 41.67%
58 14aa, >antibacterial12126... at 42.86%
59 13aa, >antibacterial12201... at 46.15%
60 15aa, >antibacterial12364... at 46.67%
61 15aa, >antibacterial12615... at 35.00%
62 11aa, >antibacterial12805... at 54.55%
63 11aa, >antibacterial12807... at 45.45%
64 15aa, >antibacterial12818... at 35.00%
65 11aa, >antibacterial12840... *
66 11aa, >antibacterial12854... at 45.45%
67 11aa, >antibacterial12866... at 45.45%
68 11aa, >antibacterial13075... at 45.45%
69 18aa, >antibacterial13097... at 44.44%
70 20aa, >antibacterial13169... at 35.00%
>Cluster 7
0 16aa, >antibacterial;antim... at 50.00%
1 15aa, >anti-Gram+;Gram-... at 46.67%
2 15aa, >Antimicrobial... at 46.67%
3 15aa, >Antimicrobial... at 35.00%
4 11aa, >antimicrobial... at 45.45%
5 16aa, >anti-Gram+;antibact... at 43.75%

```

6 13aa, >antimicrobial... at 46.15%  
7 13aa, >antimicrobial... at 46.15%  
8 24aa, >antimicrobial... at 41.67%  
9 25aa, >antibacterial;Antif... at 35.00%  
10 27aa, >antimicrobial... at 40.74%  
11 27aa, >Antibacterial;antim... at 40.74%  
12 23aa, >anti-Gram-;Antibact... at 43.48%  
13 16aa, >Antibacterial;Antif... at 50.00%  
14 18aa, >antimicrobial... at 50.00%  
15 17aa, >antibacterial;antib... at 41.18%  
16 18aa, >Antibacterial;antim... at 50.00%  
17 20aa, >anti-Gram+;Antibact... at 35.00%  
18 21aa, >antimicrobial... at 42.86%  
19 29aa, >antimicrobial... at 41.38%  
20 23aa, >anti-Gram+;Antibact... at 43.48%  
21 19aa, >antimicrobial... at 47.37%  
22 20aa, >Antifungal... at 55.00%  
23 18aa, >antibiotic... at 44.44%  
24 13aa, >anti-Gram+;anti-HIV... at 46.15%  
25 20aa, >antimicrobial... at 35.00%  
26 14aa, >antibacterial;antif... at 42.86%  
27 17aa, >anti-Gram+;antibact... at 47.06%  
28 19aa, >antimicrobial... at 42.11%  
29 11aa, >Antifungal;Antivira... at 45.45%  
30 38aa, >antibacterial;antim... \*  
31 311aa, >Antimicrobial... \*  
32 17aa, >antimicrobial... at 41.18%  
33 12aa, >antimicrobial... at 41.67%  
34 11aa, >Antimicrobial... at 45.45%  
35 15aa, >Antibacterial;Antif... at 35.00%  
36 37aa, >Antimicrobial... at 40.54%  
37 14aa, >antithrombotic... at 42.86%  
38 12aa, >antifungal... at 41.67%  
39 13aa, >antibacterial06464... at 46.15%  
40 35aa, >antibacterial07039... at 35.00%  
41 29aa, >antibacterial07501... at 41.38%  
42 12aa, >antibacterial07836... at 41.67%  
43 11aa, >antibacterial07858... \*  
44 11aa, >antibacterial07860... at 45.45%  
45 17aa, >antibacterial07910... at 41.18%  
46 20aa, >antibacterial07992... at 35.00%  
47 11aa, >antibacterial08222... at 45.45%  
48 11aa, >antibacterial08298... at 45.45%  
49 11aa, >antibacterial08567... at 54.55%  
50 15aa, >antibacterial08610... at 35.00%  
51 18aa, >antibacterial08655... at 44.44%  
52 15aa, >antibacterial08682... at 35.00%  
53 11aa, >antibacterial08757... at 45.45%  
54 12aa, >antibacterial08933... at 41.67%  
55 16aa, >antibacterial09038... at 43.75%  
56 39aa, >antibacterial09298... at 43.59%  
57 11aa, >antibacterial09347... at 45.45%  
58 20aa, >antibacterial09396... at 35.00%  
59 20aa, >antibacterial09438... at 50.00%

60 20aa, >antibacterial09460... at 35.00%  
61 20aa, >antibacterial09462... at 35.00%  
62 14aa, >antibacterial09479... at 42.86%  
63 25aa, >antibacterial09685... at 35.00%  
64 12aa, >antibacterial09954... at 41.67%  
65 12aa, >antibacterial10013... at 41.67%  
66 28aa, >antibacterial10264... at 42.86%  
67 25aa, >antibacterial10266... at 48.00%  
68 11aa, >antibacterial10502... at 54.55%  
69 12aa, >antibacterial10528... at 41.67%  
70 12aa, >antibacterial10529... at 41.67%  
71 12aa, >antibacterial10542... at 41.67%  
72 11aa, >antibacterial10564... at 45.45%  
73 11aa, >antibacterial10566... at 54.55%  
74 14aa, >antibacterial10581... at 42.86%  
75 13aa, >antibacterial10689... at 46.15%  
76 19aa, >antibacterial10790... at 47.37%  
77 13aa, >antibacterial10894... at 46.15%  
78 19aa, >antibacterial11246... at 47.37%  
79 15aa, >antibacterial11274... at 35.00%  
80 11aa, >antibacterial11276... at 54.55%  
81 14aa, >antibacterial11289... at 50.00%  
82 14aa, >antibacterial11290... at 42.86%  
83 14aa, >antibacterial11292... at 42.86%  
84 35aa, >antibacterial11494... at 35.00%  
85 15aa, >antibacterial11532... at 35.00%  
86 15aa, >antibacterial11551... at 46.67%  
87 13aa, >antibacterial11699... \*  
88 19aa, >antibacterial11713... at 32.11%  
89 20aa, >antibacterial11714... at 35.00%  
90 19aa, >antibacterial11846... at 32.11%  
91 18aa, >antibacterial11912... at 44.44%  
92 20aa, >antibacterial11937... at 45.00%  
93 14aa, >antibacterial12079... at 42.86%  
94 15aa, >antibacterial12128... at 46.67%  
95 13aa, >antibacterial12240... at 46.15%  
96 13aa, >antibacterial12277... \*  
97 14aa, >antibacterial12285... at 50.00%  
98 13aa, >antibacterial12322... at 46.15%  
99 15aa, >antibacterial12514... at 46.67%  
100 15aa, >antibacterial12701... at 35.00%  
101 14aa, >antibacterial12738... at 42.86%  
102 20aa, >antibacterial12743... at 35.00%  
103 15aa, >antibacterial12875... at 35.00%  
104 15aa, >antibacterial12944... at 35.00%  
105 15aa, >antibacterial13067... at 35.00%  
106 19aa, >antibacterial13138... at 32.11%  
107 19aa, >antibacterial13143... at 32.11%  
108 19aa, >antibacterial13144... at 32.11%  
109 38aa, >antibacterial13201... \*  
110 15aa, >antibacterial13204... at 46.67%  
111 13aa, >antibacterial13247... at 46.15%  
112 15aa, >antibacterial13298... at 53.33%  
113 15aa, >antibacterial13315... at 35.00%

```

114 11aa, >antibacterial13350... at 45.45%
115 12aa, >antibacterial13398... at 41.67%
116 12aa, >antibacterial13404... at 41.67%
117 12aa, >antibacterial13408... at 41.67%
>Cluster 8
0 17aa, >Antimicrobial... at 41.18%
1 20aa, >antimicrobial... at 35.00%
2 22aa, >anti-Gram+;antibact... at 40.91%
3 15aa, >antimicrobial... at 35.00%
4 14aa, >antibacterial;Antif... at 42.86%
5 22aa, >antibacterial;antim... at 40.91%
6 19aa, >antimicrobial... *
7 16aa, >anti-Gram+;antibact... at 43.75%
8 17aa, >antifungal;antimicr... at 41.18%
9 13aa, >anti-Gram-;anti-HIV... at 53.85%
10 13aa, >antibacterial;Antif... *
11 13aa, >anti-Gram+;antibact... at 53.85%
12 22aa, >antibacterial;Antif... at 40.91%
13 13aa, >antimicrobial... at 61.54%
14 13aa, >Antibacterial... at 53.85%
15 11aa, >Antimicrobial;Antim... at 45.45%
16 17aa, >anti-Gram+;antibact... at 47.06%
17 13aa, >antibacterial;Antif... at 46.15%
18 15aa, >antimicrobial... at 35.00%
19 15aa, >antibacterial;antim... at 46.67%
20 13aa, >anti-Gram+;antibact... at 46.15%
21 13aa, >anti-Gram+;antibact... at 46.15%
22 24aa, >antibacterial;antim... at 41.67%
23 30aa, >Antimicrobial... *
24 20aa, >antimicrobial... at 35.00%
25 34aa, >anti-Gram+;antibact... at 44.12%
26 23aa, >antimicrobial... at 43.48%
27 19aa, >antimicrobial... at 47.37%
28 25aa, >antibacterial;Antif... at 35.00%
29 21aa, >antimicrobial... at 42.86%
30 12aa, >Antibacterial... at 41.67%
31 12aa, >Antibacterial... at 41.67%
32 14aa, >antibacterial;antim... at 42.86%
33 21aa, >antimicrobial... at 42.86%
34 21aa, >antimicrobial... at 42.86%
35 21aa, >antimicrobial... at 42.86%
36 21aa, >antimicrobial... *
37 32aa, >antibacterial;antim... at 40.62%
38 16aa, >Antimicrobial... at 43.75%
39 16aa, >antibacterial... at 43.75%
40 17aa, >antibacterial;antib... at 52.94%
41 14aa, >antibiotic... at 64.29%
42 14aa, >antibacterial;antib... at 64.29%
43 18aa, >antibiotic... at 44.44%
44 23aa, >Antibacterial;Antif... at 43.48%
45 22aa, >antibacterial... at 45.45%
46 16aa, >Antimicrobial... at 50.00%
47 24aa, >antimicrobial... at 54.17%
48 30aa, >antimicrobial... at 35.00%

```

49 25aa, >anti-Gram+;antibact... at 44.00%  
50 21aa, >anti-Gram+;Antimicr... at 52.38%  
51 27aa, >antibacterial... at 51.85%  
52 25aa, >Antibacterial;antim... at 35.00%  
53 23aa, >Antimicrobial;Gram-... at 43.48%  
54 21aa, >antimicrobial... at 47.62%  
55 22aa, >antibacterial;Antif... at 40.91%  
56 21aa, >antimicrobial... at 42.86%  
57 30aa, >antimicrobial;Antim... at 35.00%  
58 25aa, >anti-Gram-;Antibact... at 44.00%  
59 25aa, >antimicrobial... at 35.00%  
60 11aa, >antibacterial;antim... at 45.45%  
61 17aa, >Antifungal;antimicr... at 41.18%  
62 20aa, >anti-Gram+;Antimicr... at 50.00%  
63 20aa, >anti-Gram+;antibact... at 35.00%  
64 14aa, >Antiviral... at 42.86%  
65 14aa, >Antibacterial;Gram-... at 42.86%  
66 16aa, >Antibacterial... at 50.00%  
67 17aa, >antimicrobial... at 41.18%  
68 19aa, >anti-Gram+;antibact... at 42.11%  
69 11aa, >Antifungal;Antivira... at 45.45%  
70 11aa, >anti-Gram-... at 54.55%  
71 20aa, >antibacterial;antif... at 35.00%  
72 20aa, >Antibacterial... at 45.00%  
73 16aa, >antimicrobial... at 43.75%  
74 13aa, >Antifungal;Antimicr... at 46.15%  
75 22aa, >Antimicrobial... at 54.55%  
76 309aa, >Antimicrobial... \*  
77 12aa, >antibacterial;antif... at 50.00%  
78 12aa, >antibacterial;antif... at 41.67%  
79 12aa, >antifungal... at 50.00%  
80 11aa, >Antibacterial;Antim... at 54.55%  
81 12aa, >antimicrobial... at 41.67%  
82 14aa, >antibacterial06535... at 42.86%  
83 18aa, >antibacterial06976... \*  
84 20aa, >antibacterial07031... at 35.00%  
85 16aa, >antibacterial07033... at 43.75%  
86 26aa, >antibacterial07293... at 46.15%  
87 12aa, >antibacterial07422... at 41.67%  
88 14aa, >antibacterial07648... at 42.86%  
89 23aa, >antibacterial07654... at 47.83%  
90 15aa, >antibacterial07656... at 66.67%  
91 12aa, >antibacterial07658... at 41.67%  
92 22aa, >antibacterial07826... at 50.00%  
93 11aa, >antibacterial07868... at 45.45%  
94 20aa, >antibacterial07973... at 55.00%  
95 14aa, >antibacterial07985... at 42.86%  
96 12aa, >antibacterial07995... at 50.00%  
97 12aa, >antibacterial07997... \*  
98 11aa, >antibacterial08221... at 54.55%  
99 20aa, >antibacterial08251... at 45.00%  
100 18aa, >antibacterial08295... at 50.00%  
101 11aa, >antibacterial08305... at 54.55%  
102 11aa, >antibacterial08306... at 54.55%



|     |       |                        |    |        |
|-----|-------|------------------------|----|--------|
| 103 | 20aa, | >antibacterial08475... | at | 35.00% |
| 104 | 21aa, | >antibacterial08490... | at | 42.86% |
| 105 | 12aa, | >antibacterial08505... | at | 41.67% |
| 106 | 14aa, | >antibacterial08578... | at | 57.14% |
| 107 | 14aa, | >antibacterial08637... | at | 42.86% |
| 108 | 14aa, | >antibacterial08638... | at | 50.00% |
| 109 | 14aa, | >antibacterial08639... | at | 50.00% |
| 110 | 15aa, | >antibacterial08646... | at | 35.00% |
| 111 | 17aa, | >antibacterial08672... | at | 47.06% |
| 112 | 15aa, | >antibacterial08727... | at | 35.00% |
| 113 | 15aa, | >antibacterial08818... | at | 35.00% |
| 114 | 15aa, | >antibacterial08826... | at | 46.67% |
| 115 | 13aa, | >antibacterial08833... | *  |        |
| 116 | 13aa, | >antibacterial08896... | at | 61.54% |
| 117 | 13aa, | >antibacterial08909... | at | 61.54% |
| 118 | 12aa, | >antibacterial08940... | at | 41.67% |
| 119 | 13aa, | >antibacterial08976... | at | 61.54% |
| 120 | 16aa, | >antibacterial09039... | at | 56.25% |
| 121 | 20aa, | >antibacterial09088... | at | 55.00% |
| 122 | 20aa, | >antibacterial09090... | at | 35.00% |
| 123 | 18aa, | >antibacterial09228... | at | 55.56% |
| 124 | 18aa, | >antibacterial09229... | at | 44.44% |
| 125 | 20aa, | >antibacterial09388... | at | 35.00% |
| 126 | 20aa, | >antibacterial09407... | at | 35.00% |
| 127 | 14aa, | >antibacterial09435... | at | 50.00% |
| 128 | 20aa, | >antibacterial09440... | at | 45.00% |
| 129 | 16aa, | >antibacterial09493... | at | 56.25% |
| 130 | 16aa, | >antibacterial09494... | at | 43.75% |
| 131 | 12aa, | >antibacterial09513... | at | 41.67% |
| 132 | 12aa, | >antibacterial09515... | at | 41.67% |
| 133 | 12aa, | >antibacterial09516... | at | 41.67% |
| 134 | 12aa, | >antibacterial09517... | at | 41.67% |
| 135 | 24aa, | >antibacterial09531... | at | 45.83% |
| 136 | 11aa, | >antibacterial09613... | at | 54.55% |
| 137 | 11aa, | >antibacterial09614... | at | 54.55% |
| 138 | 11aa, | >antibacterial09639... | at | 54.55% |
| 139 | 11aa, | >antibacterial09644... | *  |        |
| 140 | 18aa, | >antibacterial09660... | at | 44.44% |
| 141 | 18aa, | >antibacterial09661... | at | 50.00% |
| 142 | 14aa, | >antibacterial09670... | at | 42.86% |
| 143 | 25aa, | >antibacterial09683... | at | 35.00% |
| 144 | 12aa, | >antibacterial09785... | at | 41.67% |
| 145 | 12aa, | >antibacterial09789... | at | 41.67% |
| 146 | 11aa, | >antibacterial09827... | at | 45.45% |
| 147 | 12aa, | >antibacterial09949... | at | 41.67% |
| 148 | 12aa, | >antibacterial09977... | at | 41.67% |
| 149 | 12aa, | >antibacterial10018... | at | 50.00% |
| 150 | 12aa, | >antibacterial10029... | at | 41.67% |
| 151 | 20aa, | >antibacterial10035... | at | 45.00% |
| 152 | 16aa, | >antibacterial10132... | at | 43.75% |
| 153 | 12aa, | >antibacterial10139... | at | 41.67% |
| 154 | 11aa, | >antibacterial10272... | at | 45.45% |
| 155 | 26aa, | >antibacterial10304... | at | 46.15% |
| 156 | 28aa, | >antibacterial10457... | *  |        |

157 11aa, >antibacterial110503... at 63.64%  
158 12aa, >antibacterial110567... at 41.67%  
159 17aa, >antibacterial110634... at 52.94%  
160 14aa, >antibacterial110638... at 42.86%  
161 13aa, >antibacterial110686... at 46.15%  
162 14aa, >antibacterial110774... at 57.14%  
163 22aa, >antibacterial110777... at 40.91%  
164 18aa, >antibacterial110846... at 44.44%  
165 14aa, >antibacterial110944... at 50.00%  
166 18aa, >antibacterial111152... at 44.44%  
167 14aa, >antibacterial111241... at 42.86%  
168 14aa, >antibacterial111242... at 42.86%  
169 18aa, >antibacterial111306... at 44.44%  
170 14aa, >antibacterial111477... at 42.86%  
171 14aa, >antibacterial111481... at 42.86%  
172 15aa, >antibacterial111652... at 46.67%  
173 13aa, >antibacterial111703... at 46.15%  
174 27aa, >antibacterial111730... at 40.74%  
175 15aa, >antibacterial111735... at 35.00%  
176 17aa, >antibacterial111771... at 41.18%  
177 15aa, >antibacterial111772... at 53.33%  
178 23aa, >antibacterial111831... at 43.48%  
179 13aa, >antibacterial111838... \*  
180 24aa, >antibacterial111842... at 41.67%  
181 18aa, >antibacterial111856... at 44.44%  
182 14aa, >antibacterial111965... at 42.86%  
183 13aa, >antibacterial112177... at 53.85%  
184 17aa, >antibacterial112184... at 41.18%  
185 13aa, >antibacterial112195... at 53.85%  
186 13aa, >antibacterial112221... at 56.92%  
187 13aa, >antibacterial112244... at 51.54%  
188 13aa, >antibacterial112257... at 51.54%  
189 13aa, >antibacterial112265... at 53.85%  
190 13aa, >antibacterial112268... at 53.85%  
191 13aa, >antibacterial112276... at 53.85%  
192 14aa, >antibacterial112280... at 42.86%  
193 13aa, >antibacterial112281... at 53.85%  
194 14aa, >antibacterial112286... at 50.00%  
195 13aa, >antibacterial112292... at 53.85%  
196 13aa, >antibacterial112293... at 53.85%  
197 14aa, >antibacterial112294... at 50.00%  
198 14aa, >antibacterial112300... at 42.86%  
199 13aa, >antibacterial112304... at 46.15%  
200 13aa, >antibacterial112305... at 46.15%  
201 13aa, >antibacterial112312... at 46.15%  
202 11aa, >antibacterial112338... at 45.45%  
203 12aa, >antibacterial112461... at 41.67%  
204 20aa, >antibacterial112495... at 35.00%  
205 17aa, >antibacterial112502... at 41.18%  
206 11aa, >antibacterial112519... at 45.45%  
207 12aa, >antibacterial112564... at 58.33%  
208 12aa, >antibacterial112567... at 58.33%  
209 20aa, >antibacterial112573... at 35.00%  
210 18aa, >antibacterial112645... at 44.44%

```

211 17aa, >antibacterial12655... at 41.18%
212 35aa, >antibacterial12685... *
213 16aa, >antibacterial12686... at 43.75%
214 15aa, >antibacterial12698... at 35.00%
215 14aa, >antibacterial12792... at 42.86%
216 20aa, >antibacterial12801... at 35.00%
217 18aa, >antibacterial12828... at 44.44%
218 15aa, >antibacterial12865... at 46.67%
219 11aa, >antibacterial12867... at 45.45%
220 19aa, >antibacterial13309... at 47.37%
>Cluster 9
0 11aa, >anti-Gram+;antibact... at 45.45%
1 16aa, >anti-Gram+;Antibact... at 43.75%
2 15aa, >Antibacterial... at 35.00%
3 19aa, >antib;antibacterial... at 52.63%
4 14aa, >Antibacterial;Antif... at 42.86%
5 23aa, >antimicrobial... at 43.48%
6 12aa, >Antifungal;Antimicr... at 41.67%
7 16aa, >anti-Gram-;antibact... at 43.75%
8 17aa, >anti-Gram+;Antibact... at 41.18%
9 12aa, >Antifungal... at 41.67%
10 13aa, >antibacterial;Antif... at 46.15%
11 13aa, >anti-Gram+;Antibact... at 46.15%
12 28aa, >antimicrobial... at 46.43%
13 33aa, >Antibacterial;Antif... at 45.45%
14 288aa, >Antimicrobial... *
15 12aa, >antibacterial;antim... at 50.00%
16 12aa, >Antibacterial... at 58.33%
17 17aa, >anti-Gram+;anti-HIV... at 41.18%
18 17aa, >antibacterial;antim... at 41.18%
19 20aa, >Antimicrobial... at 35.00%
20 15aa, >anti-Gram+;Antimicr... at 35.00%
21 11aa, >Antibacterial... at 45.45%
22 11aa, >Antimicrobial... at 45.45%
23 11aa, >Antimicrobial... *
24 20aa, >antibacterial06664... at 50.00%
25 15aa, >antibacterial07586... at 35.00%
26 14aa, >antibacterial07588... at 42.86%
27 19aa, >antibacterial07759... at 42.11%
28 12aa, >antibacterial07876... at 41.67%
29 14aa, >antibacterial07983... at 42.86%
30 19aa, >antibacterial08369... at 42.11%
31 14aa, >antibacterial08640... at 42.86%
32 15aa, >antibacterial08688... at 46.67%
33 12aa, >antibacterial08839... at 41.67%
34 12aa, >antibacterial08840... at 41.67%
35 15aa, >antibacterial08864... at 35.00%
36 12aa, >antibacterial08935... at 41.67%
37 14aa, >antibacterial08997... at 42.86%
38 12aa, >antibacterial09249... at 41.67%
39 20aa, >antibacterial09391... *
40 12aa, >antibacterial09962... at 41.67%
41 12aa, >antibacterial09974... at 41.67%
42 12aa, >antibacterial09975... at 50.00%

```

```

43 12aa, >antibacterial10007... at 41.67%
44 12aa, >antibacterial10058... at 50.00%
45 12aa, >antibacterial10137... at 41.67%
46 15aa, >antibacterial10150... at 35.00%
47 15aa, >antibacterial10164... at 46.67%
48 15aa, >antibacterial10166... at 35.00%
49 15aa, >antibacterial10167... at 35.00%
50 11aa, >antibacterial10216... at 45.45%
51 12aa, >antibacterial10237... at 50.00%
52 12aa, >antibacterial10244... at 50.00%
53 12aa, >antibacterial10316... at 50.00%
54 11aa, >antibacterial11125... at 45.45%
55 13aa, >antibacterial11128... at 46.15%
56 11aa, >antibacterial11147... at 45.45%
57 14aa, >antibacterial11266... at 42.86%
58 11aa, >antibacterial11329... at 45.45%
59 17aa, >antibacterial11419... at 41.18%
60 20aa, >antibacterial11449... at 35.00%
61 19aa, >antibacterial11633... at 47.37%
62 13aa, >antibacterial11824... *
63 12aa, >antibacterial11979... at 41.67%
64 14aa, >antibacterial12087... at 42.86%
65 12aa, >antibacterial12093... at 41.67%
66 18aa, >antibacterial12134... at 44.44%
67 20aa, >antibacterial12450... at 35.00%
68 15aa, >antibacterial12509... at 46.67%
69 12aa, >antibacterial12659... at 41.67%
70 20aa, >antibacterial12694... at 35.00%
71 11aa, >antibacterial12806... at 54.55%
72 12aa, >antibacterial12836... at 41.67%
73 11aa, >antibacterial12845... at 45.45%
74 11aa, >antibacterial12852... *
75 12aa, >antibacterial13066... at 50.00%
>Cluster 10
0 25aa, >Antifungal... at 44.00%
1 26aa, >antimicrobial... at 42.31%
2 20aa, >antimicrobial... at 35.00%
3 13aa, >anti-Gram+;antibact... at 46.15%
4 17aa, >antibacterial;Antif... at 41.18%
5 12aa, >antifungal... at 41.67%
6 17aa, >antibiotic... at 41.18%
7 13aa, >antibacterial;Antif... at 46.15%
8 17aa, >anti-Gram+;Antimicr... at 41.18%
9 20aa, >antibacterial;antim... at 35.00%
10 285aa, >Antimicrobial... *
11 11aa, >Antiviral... at 45.45%
12 15aa, >Antifungal;Antimicr... at 35.00%
13 15aa, >Antifungal... at 35.00%
14 21aa, >Antimicrobial... at 42.86%
15 21aa, >antimicrobial... at 42.86%
16 16aa, >anti-Gram-... at 43.75%
17 12aa, >antibacterial06480... at 50.00%
18 18aa, >antibacterial06975... at 44.44%
19 12aa, >antibacterial07363... at 41.67%

```

```

20 22aa, >antibacterial07649... at 45.45%
21 11aa, >antibacterial07735... at 45.45%
22 20aa, >antibacterial07754... at 35.00%
23 20aa, >antibacterial07953... at 35.00%
24 19aa, >antibacterial08365... at 42.11%
25 15aa, >antibacterial08577... at 35.00%
26 15aa, >antibacterial08642... at 35.00%
27 15aa, >antibacterial08669... at 35.00%
28 12aa, >antibacterial08965... at 41.67%
29 20aa, >antibacterial09094... *
30 17aa, >antibacterial09547... at 47.06%
31 13aa, >antibacterial09741... at 53.85%
32 12aa, >antibacterial10138... at 41.67%
33 13aa, >antibacterial10461... at 46.15%
34 18aa, >antibacterial10474... at 44.44%
35 17aa, >antibacterial11362... at 41.18%
36 15aa, >antibacterial11465... at 35.00%
37 17aa, >antibacterial11479... at 41.18%
38 13aa, >antibacterial11681... at 46.15%
39 12aa, >antibacterial11900... at 41.67%
40 15aa, >antibacterial11931... at 60.00%
41 15aa, >antibacterial11991... at 35.00%
42 13aa, >antibacterial12153... at 53.85%
43 13aa, >antibacterial12194... at 46.15%
44 13aa, >antibacterial12199... at 46.15%
45 13aa, >antibacterial12226... at 46.15%
46 13aa, >antibacterial12248... at 46.15%
47 13aa, >antibacterial12289... at 53.85%
48 13aa, >antibacterial12290... at 46.15%
49 13aa, >antibacterial12295... at 53.85%
50 20aa, >antibacterial12598... at 35.00%
51 15aa, >antibacterial12634... *
52 15aa, >antibacterial12653... at 35.00%
53 18aa, >antibacterial12726... at 44.44%
54 15aa, >antibacterial12774... at 35.00%
55 12aa, >antibacterial13013... at 50.00%
56 15aa, >antibacterial13030... at 35.00%
57 15aa, >antibacterial13070... at 46.67%
58 12aa, >antibacterial13083... at 41.67%
59 20aa, >antibacterial13155... at 45.00%
60 20aa, >antibacterial13159... at 35.00%
61 13aa, >antibacterial13160... *
62 12aa, >antibacterial13207... at 41.67%
63 15aa, >antibacterial13242... at 35.00%
64 15aa, >antibacterial13300... at 35.00%
65 32aa, >antibacterial13312... at 40.62%
66 12aa, >antibacterial13394... at 41.67%
>Cluster 11
0 255aa, >Antimicrobial... *
1 105aa, >Antimicrobial... at 46.67%
2 106aa, >Antimicrobial... at 47.17%
3 101aa, >Antimicrobial... at 46.53%
4 102aa, >Antimicrobial... at 50.00%
5 90aa, >Antimicrobial... at 51.11%

```

6 102aa, >Antimicrobial... at 43.14%  
7 86aa, >Antimicrobial... at 44.19%  
8 105aa, >Antimicrobial... at 43.81%  
9 104aa, >Antimicrobial... at 43.27%  
10 102aa, >Antimicrobial... at 45.10%  
11 105aa, >Antimicrobial... at 35.00%  
12 105aa, >Antimicrobial... at 45.71%  
13 18aa, >anti-Gram+;Antibact... at 44.44%  
14 30aa, >antimicrobial... \*  
15 31aa, >antimicrobial;antiv... at 51.61%  
16 29aa, >antimicrobial;antiv... at 41.38%  
17 33aa, >Antimicrobial... at 48.48%  
18 31aa, >Antimicrobial... at 35.16%  
19 31aa, >Antimicrobial... at 35.16%  
20 27aa, >antimicrobial... at 51.85%  
21 28aa, >Antimicrobial... at 42.86%  
22 31aa, >Antimicrobial;Antim... at 35.16%  
23 94aa, >Antimicrobial... at 38.94%  
24 11aa, >anti-Gram+;antifung... \*  
25 13aa, >anti-Gram+;Antibact... at 43.85%  
26 14aa, >antimicrobial... at 42.86%  
27 32aa, >antimicrobial... at 43.75%  
28 31aa, >antimicrobial... at 41.94%  
29 30aa, >antibacterial;antim... at 50.00%  
30 26aa, >anti-Gram+... at 50.00%  
31 30aa, >antimicrobial... at 63.33%  
32 30aa, >antimicrobial... at 43.33%  
33 18aa, >Antibacterial;Antif... at 44.44%  
34 30aa, >anti-HIV;antimicrob... at 46.67%  
35 29aa, >antimicrobial... at 51.72%  
36 30aa, >antimicrobial... at 50.00%  
37 33aa, >antimicrobial;antiv... \*  
38 20aa, >antimicrobial... at 35.00%  
39 21aa, >antimicrobial... at 42.86%  
40 21aa, >antimicrobial... at 42.86%  
41 21aa, >antimicrobial... at 42.86%  
42 21aa, >anti-Gram+;Antibact... at 42.86%  
43 30aa, >Antimicrobial... at 46.67%  
44 30aa, >antimicrobial... at 53.33%  
45 31aa, >antimicrobial... at 45.16%  
46 30aa, >antimicrobial... at 53.33%  
47 30aa, >Antimicrobial;Antim... at 43.33%  
48 31aa, >antimicrobial... at 41.94%  
49 30aa, >antimicrobial... at 43.33%  
50 30aa, >Antimicrobial;Antim... at 46.67%  
51 34aa, >antimicrobial... at 44.12%  
52 21aa, >antimicrobial... at 42.86%  
53 31aa, >antimicrobial... at 41.94%  
54 21aa, >Antibacterial;Antif... at 42.86%  
55 30aa, >Antimicrobial... at 50.00%  
56 30aa, >antimicrobial... at 50.00%  
57 29aa, >antimicrobial... at 51.72%  
58 29aa, >antimicrobial... at 58.62%  
59 29aa, >Antibacterial;antim... at 48.28%

60 29aa, >Antimicrobial... at 51.72%  
61 29aa, >Antimicrobial;Antim... at 51.72%  
62 29aa, >Antimicrobial... at 55.17%  
63 30aa, >anti-Gram-;antibact... at 53.33%  
64 30aa, >antimicrobial... at 43.33%  
65 31aa, >Antibacterial;Antim... at 41.94%  
66 31aa, >Antibacterial;Antim... at 48.39%  
67 32aa, >antimicrobial... \*  
68 31aa, >antimicrobial... at 51.61%  
69 31aa, >Antimicrobial;Antim... at 48.39%  
70 31aa, >anti-HIV;antimicrob... at 41.94%  
71 31aa, >antimicrobial... at 45.16%  
72 32aa, >antimicrobial... at 40.62%  
73 36aa, >antibacterial;antim... at 41.67%  
74 16aa, >anti-Gram+;antibact... at 43.75%  
75 29aa, >antibacterial;Antif... at 44.83%  
76 30aa, >antimicrobial... at 43.33%  
77 25aa, >Antibacterial... at 52.00%  
78 29aa, >anti-HIV;antiviral... at 41.38%  
79 93aa, >Antimicrobial... at 46.24%  
80 93aa, >Antimicrobial... at 48.39%  
81 15aa, >anti-Gram+;Antibact... at 46.67%  
82 12aa, >antibacterial;antim... at 41.67%  
83 11aa, >Antifungal... at 45.45%  
84 120aa, >Antimicrobial... at 35.00%  
85 198aa, >Antimicrobial... at 42.93%  
86 207aa, >Antimicrobial... at 43.48%  
87 207aa, >Antimicrobial... at 42.51%  
88 207aa, >Antimicrobial... at 41.55%  
89 29aa, >antimicrobial... at 41.38%  
90 27aa, >Antimicrobial... at 44.44%  
91 19aa, >anti-Gram+;antibact... at 47.37%  
92 31aa, >anti-HIV;antiviral... at 45.16%  
93 35aa, >Antimicrobial... at 35.00%  
94 32aa, >antimicrobial... at 40.62%  
95 15aa, >Antimicrobial... at 46.67%  
96 33aa, >antibacterial;antim... at 45.45%  
97 20aa, >antibacterial06443... at 35.00%  
98 31aa, >antibacterial06484... at 41.94%  
99 30aa, >antibacterial06487... at 50.00%  
100 13aa, >antibacterial06534... at 46.15%  
101 18aa, >antibacterial06546... at 44.44%  
102 31aa, >L02A001811... at 48.39%  
103 29aa, >antibacterial06945... at 48.28%  
104 30aa, >antibacterial06946... at 50.00%  
105 30aa, >antibacterial06948... at 53.33%  
106 30aa, >antibacterial07448... at 35.00%  
107 31aa, >antibacterial07460... at 45.16%  
108 29aa, >antibacterial07794... at 51.72%  
109 29aa, >antibacterial07795... at 51.72%  
110 29aa, >antibacterial07796... at 51.72%  
111 29aa, >antibacterial07797... at 51.72%  
112 11aa, >antibacterial08210... at 54.55%  
113 30aa, >antibacterial08395... at 35.00%

```

114 20aa, >antibacterial08542... at 35.00%
115 14aa, >antibacterial08832... at 42.86%
116 12aa, >antibacterial09020... at 41.67%
117 19aa, >antibacterial09197... at 42.11%
118 20aa, >antibacterial09404... at 45.00%
119 29aa, >antibacterial09511... at 41.38%
120 29aa, >antibacterial09512... at 41.38%
121 27aa, >antibacterial09526... at 51.85%
122 27aa, >antibacterial09528... at 55.56%
123 26aa, >antibacterial09529... *
124 15aa, >antibacterial10155... at 35.00%
125 15aa, >antibacterial10161... at 35.00%
126 11aa, >antibacterial10270... at 45.45%
127 14aa, >antibacterial11238... at 42.86%
128 18aa, >antibacterial11308... at 44.44%
129 14aa, >antibacterial11387... at 42.86%
130 30aa, >antibacterial11411... at 56.67%
131 30aa, >antibacterial11412... at 50.00%
132 15aa, >antibacterial11605... at 35.00%
133 18aa, >antibacterial11615... at 44.44%
134 24aa, >antibacterial11689... at 45.83%
135 21aa, >antibacterial11794... at 42.86%
136 29aa, >antibacterial11876... at 48.28%
137 12aa, >antibacterial11928... *
138 15aa, >antibacterial11993... at 35.00%
139 15aa, >antibacterial12137... at 46.67%
140 20aa, >antibacterial12140... at 35.00%
141 15aa, >antibacterial12157... at 35.00%
142 15aa, >antibacterial12507... at 53.33%
143 12aa, >antibacterial12563... at 50.00%
144 20aa, >antibacterial12577... at 35.00%
145 15aa, >antibacterial12832... at 35.00%
146 20aa, >antibacterial13052... at 35.00%
147 15aa, >antibacterial13229... at 35.00%
148 18aa, >antibacterial13237... at 44.44%
149 20aa, >antibacterial13387... at 35.00%
>Cluster 12
0 255aa, >Antifungal... *
1 16aa, >antimicrobial... at 43.75%
2 11aa, >antibacterial;antim... at 35.45%
3 14aa, >antimicrobial;Gram-... at 42.86%
4 14aa, >anti-Gram+;Antibact... at 42.86%
5 12aa, >Anti-Gram-... at 50.00%
6 17aa, >anti-Gram+;Antibact... *
7 30aa, >antimicrobial... at 43.33%
8 21aa, >antimicrobial... at 47.62%
9 21aa, >antibacterial;Antif... at 42.86%
10 19aa, >anti-Gram+;Antibact... at 42.11%
11 15aa, >Antimicrobial;Antiv... at 46.67%
12 15aa, >Antifungal;Gram-... at 46.67%
13 21aa, >anti-Gram+;antifung... at 47.62%
14 21aa, >antibacterial;antim... *
15 15aa, >anti-Gram-;antifung... at 35.00%
16 11aa, >anti-Gram+;antibact... at 45.45%

```



17 16aa, >antibacterial;antim... at 43.75%  
18 17aa, >antibacterial;antim... at 41.18%  
19 19aa, >antimicrobial... at 42.11%  
20 12aa, >anti-Gram+;Antibact... at 41.67%  
21 25aa, >Antimicrobial... at 35.00%  
22 12aa, >antimicrobial... at 41.67%  
23 12aa, >antibacterial;antim... at 58.33%  
24 17aa, >anti-Gram+;antibact... at 41.18%  
25 11aa, >Antifungal;Gram-... at 54.55%  
26 34aa, >anti-Gram+;Antibact... at 41.18%  
27 11aa, >antithrombotic... at 45.45%  
28 14aa, >antithrombotic... at 42.86%  
29 14aa, >antimicrobial... at 50.00%  
30 16aa, >antimicrobial... at 50.00%  
31 19aa, >antibacterial07647... at 42.11%  
32 11aa, >antibacterial07715... at 54.55%  
33 13aa, >antibacterial07746... at 46.15%  
34 12aa, >antibacterial08118... at 41.67%  
35 11aa, >antibacterial08226... at 45.45%  
36 15aa, >antibacterial08618... at 35.00%  
37 17aa, >antibacterial08680... at 41.18%  
38 19aa, >antibacterial08712... at 42.11%  
39 12aa, >antibacterial09025... at 41.67%  
40 13aa, >antibacterial09230... at 46.15%  
41 12aa, >antibacterial09250... at 41.67%  
42 15aa, >antibacterial09275... at 35.00%  
43 20aa, >antibacterial09386... at 35.00%  
44 20aa, >antibacterial09411... at 35.00%  
45 20aa, >antibacterial09414... at 45.00%  
46 20aa, >antibacterial09453... at 45.00%  
47 20aa, >antibacterial09464... at 35.00%  
48 17aa, >antibacterial09694... at 47.06%  
49 13aa, >antibacterial09739... \*  
50 18aa, >antibacterial09780... at 50.00%  
51 11aa, >antibacterial09907... at 45.45%  
52 11aa, >antibacterial09912... at 54.55%  
53 11aa, >antibacterial09920... at 45.45%  
54 12aa, >antibacterial10023... at 41.67%  
55 14aa, >antibacterial10196... at 42.86%  
56 12aa, >antibacterial10232... at 58.33%  
57 13aa, >antibacterial10349... at 46.15%  
58 15aa, >antibacterial10359... at 35.00%  
59 14aa, >antibacterial10436... at 42.86%  
60 12aa, >antibacterial10538... at 41.67%  
61 14aa, >antibacterial10637... at 50.00%  
62 14aa, >antibacterial10641... at 50.00%  
63 12aa, >antibacterial10696... at 41.67%  
64 11aa, >antibacterial10699... at 54.55%  
65 14aa, >antibacterial10718... at 42.86%  
66 15aa, >antibacterial11134... at 35.00%  
67 16aa, >antibacterial11183... at 43.75%  
68 15aa, >antibacterial11227... at 35.00%  
69 15aa, >antibacterial11300... at 35.00%  
70 18aa, >antibacterial11305... at 44.44%

```

71 18aa, >antibacterial11317... at 55.56%
72 25aa, >antibacterial11342... at 35.00%
73 14aa, >antibacterial11483... at 42.86%
74 20aa, >antibacterial11500... at 35.00%
75 25aa, >antibacterial11711... at 35.00%
76 21aa, >antibacterial11808... at 42.86%
77 13aa, >antibacterial12301... at 46.15%
78 13aa, >antibacterial12303... at 46.15%
79 14aa, >antibacterial12374... at 42.86%
80 11aa, >antibacterial12383... at 45.45%
81 20aa, >antibacterial12408... at 50.00%
82 14aa, >antibacterial12499... at 42.86%
83 25aa, >antibacterial12534... at 44.00%
84 11aa, >antibacterial12548... at 45.45%
85 11aa, >antibacterial12549... at 45.45%
86 13aa, >antibacterial12554... at 53.85%
87 15aa, >antibacterial12631... at 35.00%
88 15aa, >antibacterial12636... at 46.67%
89 13aa, >antibacterial12675... at 46.15%
90 12aa, >antibacterial12734... at 41.67%
91 15aa, >antibacterial12767... at 35.00%
92 14aa, >antibacterial13010... at 42.86%
93 12aa, >antibacterial13056... at 41.67%
94 18aa, >antibacterial13165... at 44.44%
95 15aa, >antibacterial13190... *
96 17aa, >antibacterial13216... at 41.18%
97 14aa, >antibacterial13415... at 50.00%

```

>Cluster 13

```

0 255aa, >Antibacterial... *
1 27aa, >Antibacterial... at 85.19%
2 49aa, >Antibacterial... *
3 75aa, >Antibacterial... *
4 255aa, >Antibacterial... at 82.55%
5 61aa, >Antibacterial... *
6 255aa, >Antibacterial... at 75.29%
7 255aa, >Antibacterial... at 80.00%
8 255aa, >Antibacterial... at 73.53%
9 255aa, >Antibacterial... *
10 28aa, >antimicrobial... at 40.86%
11 19aa, >antibacterial;antim... at 42.63%
12 20aa, >Antimicrobial... at 35.00%
13 11aa, >antifungal... at 35.45%
14 22aa, >Antifungal;Gram-... at 30.91%
15 12aa, >antimicrobial... at 35.00%
16 15aa, >antimicrobial... at 30.00%
17 13aa, >antibacterial;Antif... at 43.85%
18 16aa, >anti-Gram+;antibact... *
19 16aa, >Antimicrobial... at 35.00%
20 13aa, >anti-Gram+;antibact... at 41.54%
21 15aa, >antimicrobial... at 30.00%
22 13aa, >anti-Gram+;Antibact... at 41.54%
23 13aa, >anti-Gram+;antimicr... at 36.15%
24 25aa, >Anti-Gram-... at 35.00%
25 25aa, >anti-Gram-;antibact... at 35.00%

```

26 12aa, >Antibacterial... at 41.67%  
27 33aa, >antimicrobial... at 45.45%  
28 17aa, >anti-Gram+;antibact... at 31.18%  
29 23aa, >anti-Gram-;antibact... at 37.83%  
30 23aa, >Anti-Gram-;antibact... at 33.48%  
31 60aa, >Antibacterial... \*  
32 255aa, >Antibacterial... at 46.47%  
33 19aa, >Antibacterial... at 32.11%  
34 13aa, >Antiviral... at 36.15%  
35 25aa, >Antimicrobial... at 30.00%  
36 20aa, >antimicrobial... at 30.00%  
37 16aa, >Antifungal;Antivira... at 33.75%  
38 20aa, >antibacterial;Antif... at 30.00%  
39 12aa, >antimicrobial... at 31.67%  
40 15aa, >Antifungal... at 30.00%  
41 26aa, >antibacterial;antim... at 36.15%  
42 12aa, >antimicrobial... at 31.67%  
43 25aa, >antibacterial;Antif... at 30.00%  
44 33aa, >antimicrobial... at 32.42%  
45 255aa, >Antibacterial... at 31.57%  
46 15aa, >Antifungal;Antimicr... at 36.67%  
47 38aa, >antibacterial06493... at 48.42%  
48 12aa, >antibacterial07727... at 31.67%  
49 11aa, >antibacterial07799... at 35.45%  
50 20aa, >antibacterial07956... at 30.00%  
51 18aa, >antibacterial07966... at 44.44%  
52 14aa, >antibacterial07982... at 32.86%  
53 30aa, >antibacterial07991... at 35.00%  
54 12aa, >antibacterial08119... at 41.67%  
55 12aa, >antibacterial08121... at 41.67%  
56 13aa, >antibacterial08168... at 53.85%  
57 13aa, >antibacterial08177... at 46.15%  
58 13aa, >antibacterial08185... at 53.85%  
59 13aa, >antibacterial08189... at 53.85%  
60 15aa, >antibacterial08192... at 35.00%  
61 15aa, >antibacterial08367... at 35.00%  
62 27aa, >antibacterial08422... \*  
63 15aa, >antibacterial08632... at 35.00%  
64 15aa, >antibacterial08742... at 35.00%  
65 26aa, >antibacterial08823... at 42.31%  
66 19aa, >antibacterial08873... at 42.11%  
67 12aa, >antibacterial08970... at 41.67%  
68 26aa, >antibacterial09002... at 46.15%  
69 12aa, >antibacterial09026... at 41.67%  
70 12aa, >antibacterial09028... at 41.67%  
71 13aa, >antibacterial09034... at 46.15%  
72 12aa, >antibacterial09244... at 41.67%  
73 12aa, >antibacterial09246... at 41.67%  
74 11aa, >antibacterial09314... at 45.45%  
75 15aa, >antibacterial09480... at 35.00%  
76 16aa, >antibacterial09546... at 50.00%  
77 13aa, >antibacterial09592... at 46.15%  
78 14aa, >antibacterial09692... at 42.86%  
79 14aa, >antibacterial09695... at 42.86%

80 18aa, >antibacterial09855... \*

81 12aa, >antibacterial09955... at 41.67%

82 12aa, >antibacterial09956... at 41.67%

83 12aa, >antibacterial09963... at 41.67%

84 12aa, >antibacterial09964... at 41.67%

85 15aa, >antibacterial09965... at 35.00%

86 13aa, >antibacterial09980... at 46.15%

87 15aa, >antibacterial10157... at 46.67%

88 14aa, >antibacterial10191... at 42.86%

89 20aa, >antibacterial10225... at 45.00%

90 12aa, >antibacterial10243... at 41.67%

91 15aa, >antibacterial10355... at 35.00%

92 15aa, >antibacterial10356... at 35.00%

93 13aa, >antibacterial10448... at 53.85%

94 18aa, >antibacterial10633... at 44.44%

95 16aa, >antibacterial10830... at 43.75%

96 20aa, >antibacterial11375... at 35.00%

97 20aa, >antibacterial11440... at 35.00%

98 16aa, >antibacterial11542... at 43.75%

99 12aa, >antibacterial11723... at 41.67%

100 18aa, >antibacterial11757... at 55.56%

101 15aa, >antibacterial11788... at 35.00%

102 21aa, >antibacterial11859... at 42.86%

103 13aa, >antibacterial11884... at 46.15%

104 21aa, >antibacterial11935... at 42.86%

105 12aa, >antibacterial12011... at 41.67%

106 13aa, >antibacterial12258... at 46.15%

107 13aa, >antibacterial12262... at 46.15%

108 13aa, >antibacterial12263... at 46.15%

109 13aa, >antibacterial12264... at 53.85%

110 13aa, >antibacterial12266... at 46.15%

111 13aa, >antibacterial12267... at 46.15%

112 13aa, >antibacterial12298... \*

113 13aa, >antibacterial12299... at 46.15%

114 14aa, >antibacterial12306... at 42.86%

115 14aa, >antibacterial12307... at 42.86%

116 13aa, >antibacterial12324... at 46.15%

117 13aa, >antibacterial12326... at 46.15%

118 12aa, >antibacterial12386... at 41.67%

119 12aa, >antibacterial12387... at 41.67%

120 12aa, >antibacterial12396... at 41.67%

121 12aa, >antibacterial12569... at 41.67%

122 19aa, >antibacterial12585... at 42.11%

123 20aa, >antibacterial12799... at 45.00%

124 18aa, >antibacterial12808... at 50.00%

125 12aa, >antibacterial12911... at 41.67%

126 12aa, >antibacterial12915... at 41.67%

127 12aa, >antibacterial12916... at 41.67%

128 12aa, >antibacterial13114... at 50.00%

129 27aa, >antibacterial13239... at 40.74%

130 13aa, >antibacterial13275... at 53.85%

131 12aa, >antibacterial13282... at 41.67%

132 12aa, >antibacterial13283... at 41.67%

133 12aa, >antibacterial13284... at 38.33%

```
134 12aa, >antibacterial13396... at 40.00%
>Cluster 14
0 255aa, >Antimicrobial... *
1 13aa, >anti-Gram-;antibact... at 46.15%
2 13aa, >Antibacterial;Antim... *
3 11aa, >Antibacterial... at 45.45%
4 112aa, >Antimicrobial... at 45.54%
5 22aa, >antibacterial;antim... at 40.91%
6 13aa, >antimicrobial... at 46.15%
7 17aa, >Antimicrobial... at 41.18%
8 17aa, >antibacterial;antim... at 41.18%
9 12aa, >Antifungal;Antimicr... at 41.67%
10 12aa, >Antifungal;Antimicr... at 41.67%
11 16aa, >antibacterial... at 50.00%
12 19aa, >anti-Gram-;Antibact... at 42.11%
13 39aa, >antibacterial;antif... at 41.03%
14 11aa, >antimicrobial... at 45.45%
15 32aa, >anti-Gram+;antimicr... *
16 12aa, >antimicrobial... at 41.67%
17 255aa, >Antimicrobial... at 59.61%
18 52aa, >Antimicrobial... *
19 255aa, >Antimicrobial... at 43.14%
20 16aa, >antimicrobial... at 43.75%
21 16aa, >antimicrobial... at 43.75%
22 15aa, >antimicrobial... at 35.00%
23 15aa, >antimicrobial... at 35.00%
24 11aa, >antibacterial... at 45.45%
25 13aa, >antibacterial106463... at 53.85%
26 20aa, >antibacterial106510... at 35.00%
27 35aa, >antibacterial106541... at 35.00%
28 13aa, >antibacterial106939... at 46.15%
29 13aa, >antibacterial107773... at 46.15%
30 12aa, >antibacterial107958... at 41.67%
31 11aa, >antibacterial108285... at 45.45%
32 11aa, >antibacterial108290... at 45.45%
33 15aa, >antibacterial108316... at 35.00%
34 12aa, >antibacterial108326... at 41.67%
35 20aa, >antibacterial108423... at 55.00%
36 15aa, >antibacterial108684... at 35.00%
37 15aa, >antibacterial108690... at 53.33%
38 11aa, >antibacterial108751... *
39 11aa, >antibacterial108756... at 45.45%
40 12aa, >antibacterial108821... at 66.67%
41 25aa, >antibacterial109099... at 48.00%
42 14aa, >antibacterial109878... at 42.86%
43 11aa, >antibacterial109943... at 45.45%
44 15aa, >antibacterial110070... at 35.00%
45 15aa, >antibacterial110071... at 35.00%
46 15aa, >antibacterial110073... at 35.00%
47 15aa, >antibacterial110439... at 46.67%
48 12aa, >antibacterial110505... at 41.67%
49 12aa, >antibacterial110537... at 50.00%
50 27aa, >antibacterial110712... at 40.74%
51 22aa, >antibacterial111267... *
```

```

52 12aa, >antibacterial111366... at 31.67%
53 18aa, >antibacterial111586... at 44.44%
54 20aa, >antibacterial111593... at 35.00%
55 14aa, >antibacterial111620... at 50.00%
56 13aa, >antibacterial111861... at 46.15%
57 23aa, >antibacterial111908... at 47.83%
58 12aa, >antibacterial111913... at 41.67%
59 14aa, >antibacterial112085... at 50.00%
60 26aa, >antibacterial112437... at 42.31%
61 13aa, >antibacterial112521... at 33.85%
62 18aa, >antibacterial112614... at 35.00%
63 19aa, >antibacterial112667... at 47.37%
64 20aa, >antibacterial112724... at 35.00%
65 15aa, >antibacterial112791... at 35.00%
66 20aa, >antibacterial112802... at 42.00%
67 20aa, >antibacterial112809... at 35.00%
68 11aa, >antibacterial112856... at 35.45%
69 15aa, >antibacterial112886... at 35.00%
70 25aa, >antibacterial112922... at 44.00%
71 15aa, >antibacterial112935... at 53.33%
72 20aa, >antibacterial113020... at 35.00%
73 12aa, >antibacterial113037... *
74 15aa, >antibacterial113305... at 35.00%
75 11aa, >antibacterial113330... at 45.45%
76 11aa, >antibacterial113347... at 54.55%
77 11aa, >antibacterial113348... at 63.64%
78 11aa, >antibacterial113349... at 45.45%
79 11aa, >antibacterial113351... at 54.55%
80 17aa, >antibacterial113412... at 41.18%
>Cluster 15
0 15aa, >Antibacterial;Antif... at 53.33%
1 255aa, >Antimicrobial... *
2 43aa, >Antimicrobial... at 41.86%
3 43aa, >Antimicrobial... at 41.86%
4 255aa, >Antimicrobial... at 52.16%
5 25aa, >anti-Gram+;Antifung... at 35.00%
6 13aa, >antimicrobial... at 46.15%
7 255aa, >Antimicrobial... at 52.55%
8 20aa, >antibacterial;antim... at 45.00%
9 14aa, >anti-Gram-;antibact... at 42.86%
10 15aa, >antibacterial;antim... at 46.67%
11 13aa, >antibacterial;Antif... *
12 12aa, >Antibacterial... at 41.67%
13 12aa, >Antibacterial... at 41.67%
14 12aa, >anti-Gram+;antibact... at 50.00%
15 18aa, >anti-Gram+;antibact... at 44.44%
16 16aa, >Antimicrobial... at 43.75%
17 21aa, >anti-Gram+;anti-HIV... at 42.86%
18 18aa, >Antibacterial;Antif... at 55.56%
19 26aa, >antibacterial;antim... at 42.31%
20 31aa, >Antimicrobial... at 45.16%
21 14aa, >antibacterial;antim... at 42.86%
22 255aa, >Antimicrobial... at 70.59%
23 54aa, >Antimicrobial... at 40.74%

```

24 255aa, >Antibacterial... at 55.29%  
25 14aa, >Antibacterial;Antim... at 50.00%  
26 11aa, >Antifungal;antimicr... at 45.45%  
27 230aa, >Antimicrobial... at 47.83%  
28 255aa, >Antimicrobial... at 50.59%  
29 255aa, >Antimicrobial... at 51.37%  
30 255aa, >Antimicrobial... at 35.00%  
31 255aa, >Antimicrobial... at 55.69%  
32 255aa, >Antimicrobial... at 60.78%  
33 255aa, >Antimicrobial... at 60.39%  
34 256aa, >Antimicrobial... at 48.24%  
35 256aa, >Antimicrobial... at 78.04%  
36 256aa, >Antimicrobial... at 49.80%  
37 257aa, >Antimicrobial... at 48.63%  
38 257aa, >Antimicrobial... at 49.02%  
39 257aa, >Antimicrobial... at 54.51%  
40 257aa, >Antimicrobial... at 49.02%  
41 265aa, >Antimicrobial... at 48.24%  
42 258aa, >Antimicrobial... \*  
43 258aa, >Antimicrobial... at 48.24%  
44 182aa, >Antimicrobial... at 42.86%  
45 255aa, >Antimicrobial... at 48.24%  
46 255aa, >Antimicrobial... at 46.67%  
47 255aa, >Antimicrobial... at 47.84%  
48 255aa, >Antimicrobial... at 49.41%  
49 255aa, >Antimicrobial... at 44.12%  
50 255aa, >Antimicrobial... at 46.27%  
51 222aa, >Antimicrobial... at 54.05%  
52 255aa, >Antimicrobial... at 48.63%  
53 255aa, >Antimicrobial... at 50.59%  
54 255aa, >Antimicrobial... at 53.33%  
55 255aa, >Antimicrobial... at 51.76%  
56 255aa, >Antimicrobial... at 42.75%  
57 255aa, >Antimicrobial... at 45.49%  
58 255aa, >Antimicrobial... at 47.06%  
59 255aa, >Antibacterial... at 46.67%  
60 255aa, >Antimicrobial... at 50.98%  
61 255aa, >Antimicrobial... at 52.16%  
62 255aa, >Antimicrobial... at 49.02%  
63 255aa, >Antimicrobial... at 46.67%  
64 255aa, >Antimicrobial... at 51.37%  
65 255aa, >Antimicrobial... at 40.78%  
66 255aa, >Antimicrobial... at 50.98%  
67 13aa, >antimicrobial... \*  
68 20aa, >anti-Gram+;antibact... at 35.00%  
69 25aa, >antibacterial07320... at 44.00%  
70 12aa, >antibacterial07372... at 41.67%  
71 29aa, >antibacterial07502... at 41.38%  
72 20aa, >antibacterial07631... at 35.00%  
73 18aa, >antibacterial08045... at 50.00%  
74 13aa, >antibacterial08150... at 46.15%  
75 13aa, >antibacterial08165... at 46.15%  
76 13aa, >antibacterial08174... at 46.15%  
77 17aa, >antibacterial08245... at 41.18%

```

78 15aa, >antibacterial08318... at 46.67%
79 16aa, >antibacterial08354... at 43.75%
80 16aa, >antibacterial08356... at 43.75%
81 12aa, >antibacterial08503... at 41.67%
82 12aa, >antibacterial08588... at 41.67%
83 14aa, >antibacterial08604... at 50.00%
84 18aa, >antibacterial08668... at 50.00%
85 12aa, >antibacterial08786... at 50.00%
86 12aa, >antibacterial08836... at 41.67%
87 12aa, >antibacterial08987... at 41.67%
88 12aa, >antibacterial08989... at 50.00%
89 21aa, >antibacterial09235... at 47.62%
90 21aa, >antibacterial09236... at 42.86%
91 12aa, >antibacterial09952... at 50.00%
92 12aa, >antibacterial09953... at 41.67%
93 15aa, >antibacterial10151... at 46.67%
94 20aa, >antibacterial10226... at 35.00%
95 19aa, >antibacterial10379... at 47.37%
96 34aa, >antibacterial10604... at 41.18%
97 14aa, >antibacterial10620... at 42.86%
98 29aa, >antibacterial10755... at 44.83%
99 29aa, >antibacterial10756... at 44.83%
100 23aa, >antibacterial11135... at 47.83%
101 14aa, >antibacterial11234... at 50.00%
102 14aa, >antibacterial11257... at 42.86%
103 19aa, >antibacterial11528... at 42.11%
104 27aa, >antibacterial11583... at 44.44%
105 13aa, >antibacterial11609... at 46.15%
106 11aa, >antibacterial11641... at 45.45%
107 24aa, >antibacterial11680... at 41.67%
108 13aa, >antibacterial11696... at 46.15%
109 15aa, >antibacterial11759... at 35.00%
110 15aa, >antibacterial11797... at 35.00%
111 15aa, >antibacterial11997... at 46.67%
112 15aa, >antibacterial12131... *
113 21aa, >antibacterial12349... at 42.86%
114 14aa, >antibacterial12449... at 42.86%
115 17aa, >antibacterial12595... at 47.06%
116 20aa, >antibacterial12742... at 45.00%
117 11aa, >antibacterial13081... at 45.45%
118 12aa, >antibacterial13397... at 41.67%
>Cluster 16
0 14aa, >anti-Gram+;Gram-... at 42.86%
1 255aa, >Antibacterial... *
2 14aa, >antimicrobial... at 42.86%
3 27aa, >anti-Gram+;antibact... at 40.74%
4 27aa, >antimicrobial... at 40.74%
5 21aa, >antimicrobial... *
6 12aa, >Antibacterial... at 41.67%
7 21aa, >antimicrobial... at 47.62%
8 21aa, >Antibacterial... at 42.86%
9 15aa, >Antifungal... at 35.00%
10 19aa, >Antibacterial... *
11 13aa, >antimicrobial... at 46.15%

```



```

12 11aa, >Antibacterial... at 54.55%
13 13aa, >antibacterial06991... at 46.15%
14 17aa, >antibacterial07790... at 41.18%
15 11aa, >antibacterial07861... at 45.45%
16 11aa, >antibacterial07865... *
17 11aa, >antibacterial07866... at 54.55%
18 30aa, >antibacterial07993... at 35.00%
19 18aa, >antibacterial08032... at 44.44%
20 13aa, >antibacterial08162... at 53.85%
21 17aa, >antibacterial08391... at 41.18%
22 13aa, >antibacterial08705... at 53.85%
23 15aa, >antibacterial08765... at 35.00%
24 11aa, >antibacterial09312... at 54.55%
25 11aa, >antibacterial09316... at 43.64%
26 20aa, >antibacterial09461... at 35.00%
27 26aa, >antibacterial09892... at 42.31%
28 27aa, >antibacterial09893... at 44.44%
29 16aa, >antibacterial09918... at 43.75%
30 12aa, >antibacterial10136... at 41.67%
31 20aa, >antibacterial10340... at 45.00%
32 15aa, >antibacterial11188... at 35.00%
33 14aa, >antibacterial11293... at 50.00%
34 18aa, >antibacterial11307... at 44.44%
35 11aa, >antibacterial11358... at 45.45%
36 25aa, >antibacterial11380... at 35.00%
37 15aa, >antibacterial11549... at 46.67%
38 15aa, >antibacterial11829... at 35.00%
39 20aa, >antibacterial11891... at 45.00%
40 20aa, >antibacterial11914... at 45.00%
41 25aa, >antibacterial11945... at 48.00%
42 13aa, >antibacterial12149... at 46.15%
43 13aa, >antibacterial12176... at 53.85%
44 13aa, >antibacterial12178... at 46.15%
45 13aa, >antibacterial12193... at 46.15%
46 13aa, >antibacterial12222... at 46.15%
47 13aa, >antibacterial12223... at 46.15%
48 13aa, >antibacterial12236... at 46.15%
49 13aa, >antibacterial12238... at 46.15%
50 13aa, >antibacterial12255... at 46.15%
51 13aa, >antibacterial12256... at 46.15%
52 13aa, >antibacterial12278... at 53.85%
53 13aa, >antibacterial12283... at 46.15%
54 20aa, >antibacterial12489... at 35.00%
55 12aa, >antibacterial12558... at 41.67%
56 15aa, >antibacterial12771... at 35.00%
57 20aa, >antibacterial12872... at 35.00%
58 21aa, >antibacterial13032... at 42.86%
59 12aa, >antibacterial13047... at 41.67%
60 20aa, >antibacterial13128... at 35.00%
>Cluster 17
0 255aa, >Antibacterial... *
1 27aa, >antibacterial;Antif... at 40.74%
2 18aa, >anti-Gram+;antimicr... at 44.44%
3 24aa, >Antimicrobial... at 41.67%

```

```

4      13aa, >Gram-... *
5      20aa, >antimicrobial... at 35.00%
6      20aa, >antimicrobial... at 35.00%
7      25aa, >antimicrobial... at 35.00%
8      25aa, >antimicrobial... at 35.00%
9      13aa, >antibacterial;Antif... at 46.15%
10     17aa, >Antimicrobial... at 41.18%
11     15aa, >Antimicrobial... at 46.67%
12     14aa, >antimicrobial... at 42.86%
13     13aa, >anti-Gram-;Antibact... at 46.15%
14     11aa, >Antimicrobial... at 45.45%
15     13aa, >Antibacterial... at 46.15%
16     16aa, >anti-Gram+;Gram-... at 43.75%
17     17aa, >antibacterial06646... at 41.18%
18     15aa, >antibacterial07667... *
19     11aa, >antibacterial07854... at 45.45%
20     13aa, >antibacterial08184... at 46.15%
21     11aa, >antibacterial08209... at 45.45%
22     11aa, >antibacterial08363... at 45.45%
23     18aa, >antibacterial08731... at 50.00%
24     13aa, >antibacterial08894... at 46.15%
25     20aa, >antibacterial09126... at 35.00%
26     17aa, >antibacterial09548... at 41.18%
27     20aa, >antibacterial10033... at 35.00%
28     16aa, >antibacterial10588... at 40.00%
29     16aa, >antibacterial10589... at 43.75%
30     14aa, >antibacterial10792... at 42.86%
31     13aa, >antibacterial10871... *
32     20aa, >antibacterial11495... at 45.00%
33     20aa, >antibacterial11940... at 35.00%
34     15aa, >antibacterial12097... at 35.00%
35     20aa, >antibacterial12397... at 45.00%
36     15aa, >antibacterial12652... at 35.00%
37     20aa, >antibacterial13243... at 35.00%
38     18aa, >antibacterial13274... at 44.44%
39     12aa, >antibacterial13393... at 40.00%

```

>Cluster 18

```

0      21aa, >Antifungal... at 42.86%
1      255aa, >Antimicrobial... *
2      15aa, >Antimicrobial... at 35.00%
3      15aa, >antimicrobial... at 35.00%
4      29aa, >antimicrobial... at 44.83%
5      13aa, >anti-Gram+;Antimicr... at 46.15%
6      13aa, >anti-Gram+;Antibact... *
7      13aa, >antimicrobial... at 46.15%
8      19aa, >Antimicrobial... at 42.11%
9      13aa, >Antifungal;Antimicr... at 53.85%
10     13aa, >Antifungal;Antimicr... at 46.15%
11     17aa, >anti-Gram+;antibact... at 47.06%
12     14aa, >anti-Gram+;antibact... at 42.86%
13     12aa, >Antifungal;Antimicr... *
14     12aa, >Antifungal;Antimicr... at 50.00%
15     12aa, >Antifungal;antibact... at 50.00%
16     12aa, >Antifungal;Antimicr... at 41.67%

```

17 12aa, >Antifungal;Antimicr... at 50.00%  
18 12aa, >Antifungal;Antimicr... at 41.67%  
19 12aa, >Antifungal;Antimicr... at 41.67%  
20 21aa, >anti-Gram+;Antimicr... at 42.86%  
21 29aa, >anti-Gram+;antibact... at 41.38%  
22 17aa, >Antimicrobial... \*  
23 23aa, >antimicrobial... at 43.48%  
24 14aa, >anti-Gram+;antibact... at 42.86%  
25 20aa, >anti-Gram+;antibact... at 35.00%  
26 13aa, >antimicrobial... at 46.15%  
27 11aa, >anti-Gram-;antifung... at 45.45%  
28 20aa, >antimicrobial... at 45.00%  
29 18aa, >Antibacterial... at 44.44%  
30 43aa, >Antimicrobial... at 44.19%  
31 17aa, >anti-Gram+;Gram-... at 41.18%  
32 14aa, >anti-Gram+;antibact... at 42.86%  
33 17aa, >antimicrobial... at 41.18%  
34 13aa, >antimicrobial... at 46.15%  
35 11aa, >antimicrobial... at 45.45%  
36 13aa, >Antibacterial... \*  
37 15aa, >antimicrobial... at 35.00%  
38 15aa, >antimicrobial... at 35.00%  
39 26aa, >antibacterial06655... at 42.31%  
40 14aa, >antibacterial06660... at 50.00%  
41 14aa, >antibacterial06935... \*  
42 13aa, >antibacterial06965... at 46.15%  
43 25aa, >antibacterial07268... at 35.00%  
44 26aa, >antimicrobial... at 42.31%  
45 17aa, >antibacterial07700... at 47.06%  
46 15aa, >antibacterial07825... at 35.00%  
47 26aa, >antibacterial07883... at 42.31%  
48 20aa, >antibacterial07931... at 35.00%  
49 19aa, >antibacterial07937... at 42.11%  
50 16aa, >antibacterial08052... at 43.75%  
51 13aa, >antibacterial08154... at 46.15%  
52 13aa, >antibacterial08181... at 46.15%  
53 18aa, >antibacterial08406... at 44.44%  
54 19aa, >antibacterial08533... at 42.11%  
55 14aa, >antibacterial08602... at 42.86%  
56 19aa, >antibacterial08721... at 47.37%  
57 11aa, >antibacterial08748... at 45.45%  
58 15aa, >antibacterial08802... at 35.00%  
59 17aa, >antibacterial08848... at 41.18%  
60 16aa, >antibacterial09065... at 43.75%  
61 15aa, >antibacterial09163... at 35.00%  
62 11aa, >antibacterial09167... at 45.45%  
63 11aa, >antibacterial09184... at 45.45%  
64 12aa, >antibacterial09247... at 50.00%  
65 12aa, >antibacterial09248... at 50.00%  
66 12aa, >antibacterial09253... at 41.67%  
67 11aa, >antibacterial09833... at 45.45%  
68 27aa, >antibacterial09873... at 40.74%  
69 11aa, >antibacterial09914... at 45.45%  
70 13aa, >antibacterial09990... at 46.15%

```

71 13aa, >antibacterial110121... at 46.15%
72 13aa, >antibacterial110131... at 46.15%
73 12aa, >antibacterial110172... at 41.67%
74 12aa, >antibacterial110218... at 41.67%
75 21aa, >antibacterial110443... at 42.86%
76 20aa, >antibacterial110444... at 35.00%
77 13aa, >antibacterial110458... at 46.15%
78 16aa, >antibacterial110590... at 43.75%
79 16aa, >antibacterial110591... at 46.25%
80 13aa, >antibacterial110631... at 46.15%
81 14aa, >antibacterial111123... *
82 25aa, >antibacterial111138... at 35.00%
83 13aa, >antibacterial111488... at 46.15%
84 36aa, >antibacterial111546... at 41.67%
85 15aa, >antibacterial111561... at 35.00%
86 17aa, >antibacterial111939... at 41.18%
87 14aa, >antibacterial112004... at 42.86%
88 18aa, >antibacterial112122... at 44.44%
89 13aa, >antibacterial112216... at 46.15%
90 18aa, >antibacterial112339... at 50.00%
91 18aa, >antibacterial112340... at 50.00%
92 12aa, >antibacterial112348... at 41.67%
93 12aa, >antibacterial112368... at 41.67%
94 25aa, >antibacterial112422... at 35.00%
95 14aa, >antibacterial112423... *
96 15aa, >antibacterial112432... at 35.00%
97 26aa, >antibacterial112438... at 42.31%
98 11aa, >antibacterial112445... *
99 20aa, >antibacterial112479... at 35.00%
100 20aa, >antibacterial112481... at 35.00%
101 20aa, >antibacterial112483... at 35.00%
102 20aa, >antibacterial112491... at 45.00%
103 15aa, >antibacterial112544... at 46.67%
104 13aa, >antibacterial112545... at 46.15%
105 11aa, >antibacterial112546... at 54.55%
106 15aa, >antibacterial112605... at 46.67%
107 15aa, >antibacterial112718... at 35.00%
108 25aa, >antibacterial112766... at 35.00%
109 11aa, >antibacterial112938... at 45.45%
110 14aa, >antibacterial112999... at 42.86%
111 35aa, >antibacterial113211... at 35.00%
112 15aa, >antibacterial113363... at 35.00%
>Cluster 19
0 222aa, >Antimicrobial... at 50.90%
1 221aa, >Antifungal... at 52.94%
2 226aa, >Antimicrobial... at 45.13%
3 202aa, >Antimicrobial... at 43.07%
4 32aa, >antimicrobial;Antim... at 40.62%
5 13aa, >antimicrobial... at 46.15%
6 255aa, >Antimicrobial... *
7 42aa, >Antimicrobial... at 40.48%
8 255aa, >Antimicrobial... at 51.96%
9 15aa, >antibacterial;antim... at 35.00%
10 13aa, >anti-Gram+;antibact... at 46.15%

```

11 231aa, >Antimicrobial... at 41.13%  
12 27aa, >antibacterial;antim... at 40.74%  
13 29aa, >antimicrobial... at 44.83%  
14 21aa, >antimicrobial... at 47.62%  
15 19aa, >anti-Gram+;antibact... \*  
16 23aa, >antimicrobial... at 43.48%  
17 187aa, >Antimicrobial... at 40.11%  
18 22aa, >Anti-Gram-;Antibact... at 40.91%  
19 25aa, >anti-Gram+;antibact... at 35.00%  
20 25aa, >anti-Gram+;antibact... at 35.00%  
21 30aa, >anti-Gram+;Antibact... at 35.00%  
22 34aa, >anti-Gram-... at 41.18%  
23 118aa, >Antimicrobial... at 44.07%  
24 13aa, >antimicrobial... at 46.15%  
25 13aa, >antimicrobial;antiv... at 46.15%  
26 25aa, >anti-Gram+;antibact... at 35.00%  
27 224aa, >Antimicrobial... at 43.30%  
28 226aa, >Antimicrobial... at 61.50%  
29 255aa, >Antimicrobial... at 58.82%  
30 255aa, >Antimicrobial... at 60.78%  
31 255aa, >Antimicrobial... \*  
32 247aa, >Antimicrobial... at 48.58%  
33 229aa, >Antimicrobial... at 43.23%  
34 255aa, >Antimicrobial... at 53.53%  
35 249aa, >Antimicrobial... at 48.59%  
36 255aa, >Antimicrobial... at 58.04%  
37 255aa, >Antimicrobial... at 57.65%  
38 255aa, >Antimicrobial... at 72.16%  
39 255aa, >Antimicrobial... \*  
40 235aa, >Antimicrobial... at 41.70%  
41 255aa, >Antimicrobial... at 44.71%  
42 247aa, >Antimicrobial... at 48.18%  
43 255aa, >Antimicrobial... at 56.47%  
44 235aa, >Antimicrobial... at 47.23%  
45 245aa, >Antimicrobial... at 48.98%  
46 236aa, >Antimicrobial... at 42.37%  
47 255aa, >Antimicrobial... at 69.80%  
48 255aa, >Antimicrobial... at 55.69%  
49 234aa, >Antimicrobial... at 43.59%  
50 227aa, >Antimicrobial... at 40.53%  
51 255aa, >Antimicrobial... at 41.18%  
52 233aa, >Antimicrobial... at 48.93%  
53 247aa, >Antimicrobial... at 50.61%  
54 247aa, >Antimicrobial... at 50.20%  
55 245aa, >Antimicrobial... at 54.29%  
56 243aa, >Antimicrobial... at 46.09%  
57 255aa, >Antimicrobial... at 57.25%  
58 244aa, >Antimicrobial... at 52.87%  
59 255aa, >Antimicrobial... at 41.57%  
60 255aa, >Antimicrobial... at 56.86%  
61 246aa, >Antimicrobial... at 50.00%  
62 255aa, >Antimicrobial... at 42.35%  
63 255aa, >Antimicrobial... at 64.71%  
64 249aa, >Antimicrobial... at 42.97%

|     |                          |           |
|-----|--------------------------|-----------|
| 65  | 233aa, >Antimicrobial... | at 46.78% |
| 66  | 255aa, >Antimicrobial... | at 41.57% |
| 67  | 255aa, >Antimicrobial... | at 56.86% |
| 68  | 255aa, >Antimicrobial... | at 41.96% |
| 69  | 255aa, >Antimicrobial... | at 41.57% |
| 70  | 255aa, >Antimicrobial... | at 41.57% |
| 71  | 233aa, >Antimicrobial... | at 48.93% |
| 72  | 251aa, >Antimicrobial... | at 50.20% |
| 73  | 250aa, >Antimicrobial... | at 50.40% |
| 74  | 248aa, >Antimicrobial... | at 53.63% |
| 75  | 255aa, >Antimicrobial... | at 54.51% |
| 76  | 255aa, >Antimicrobial... | at 58.82% |
| 77  | 255aa, >Antimicrobial... | at 58.43% |
| 78  | 250aa, >Antimicrobial... | at 49.60% |
| 79  | 255aa, >Antimicrobial... | at 60.00% |
| 80  | 255aa, >Antimicrobial... | at 59.22% |
| 81  | 236aa, >Antimicrobial... | at 48.31% |
| 82  | 255aa, >Antimicrobial... | at 40.39% |
| 83  | 255aa, >Antimicrobial... | at 47.84% |
| 84  | 255aa, >Antimicrobial... | at 43.53% |
| 85  | 249aa, >Antimicrobial... | at 51.41% |
| 86  | 255aa, >Antimicrobial... | at 55.69% |
| 87  | 255aa, >Antimicrobial... | at 53.73% |
| 88  | 253aa, >Antimicrobial... | at 48.22% |
| 89  | 247aa, >Antimicrobial... | at 50.61% |
| 90  | 254aa, >Antimicrobial... | at 46.85% |
| 91  | 241aa, >Antimicrobial... | at 48.96% |
| 92  | 239aa, >Antimicrobial... | at 50.21% |
| 93  | 255aa, >Antimicrobial... | at 43.92% |
| 94  | 234aa, >Antimicrobial... | at 50.85% |
| 95  | 255aa, >Antimicrobial... | at 48.63% |
| 96  | 255aa, >Antimicrobial... | at 64.31% |
| 97  | 255aa, >Antimicrobial... | *         |
| 98  | 226aa, >Antimicrobial... | at 48.67% |
| 99  | 231aa, >Antimicrobial... | at 40.26% |
| 100 | 255aa, >Antimicrobial... | at 47.84% |
| 101 | 255aa, >Antimicrobial... | at 60.78% |
| 102 | 255aa, >Antimicrobial... | at 35.00% |
| 103 | 255aa, >Antimicrobial... | at 62.75% |
| 104 | 248aa, >Antimicrobial... | at 45.56% |
| 105 | 234aa, >Antimicrobial... | at 47.86% |
| 106 | 233aa, >Antimicrobial... | at 42.92% |
| 107 | 255aa, >Antimicrobial... | at 43.92% |
| 108 | 255aa, >Antimicrobial... | at 56.86% |
| 109 | 255aa, >Antimicrobial... | at 62.75% |
| 110 | 255aa, >Antimicrobial... | at 55.69% |
| 111 | 255aa, >Antimicrobial... | at 45.49% |
| 112 | 248aa, >Antimicrobial... | at 42.74% |
| 113 | 255aa, >Antimicrobial... | at 45.88% |
| 114 | 255aa, >Antimicrobial... | at 62.35% |
| 115 | 255aa, >Antimicrobial... | at 58.82% |
| 116 | 244aa, >Antimicrobial... | at 47.54% |
| 117 | 255aa, >Antimicrobial... | at 63.14% |
| 118 | 255aa, >Antimicrobial... | at 58.82% |

|     |                          |           |
|-----|--------------------------|-----------|
| 119 | 255aa, >Antimicrobial... | at 54.90% |
| 120 | 233aa, >Antimicrobial... | at 42.92% |
| 121 | 255aa, >Antimicrobial... | at 58.43% |
| 122 | 255aa, >Antimicrobial... | at 67.45% |
| 123 | 240aa, >Antimicrobial... | at 54.58% |
| 124 | 255aa, >Antimicrobial... | at 54.51% |
| 125 | 251aa, >Antimicrobial... | at 48.21% |
| 126 | 251aa, >Antimicrobial... | at 50.60% |
| 127 | 253aa, >Antimicrobial... | at 40.32% |
| 128 | 255aa, >Antimicrobial... | at 56.08% |
| 129 | 255aa, >Antimicrobial... | at 56.08% |
| 130 | 255aa, >Antimicrobial... | at 58.04% |
| 131 | 255aa, >Antimicrobial... | at 58.04% |
| 132 | 255aa, >Antimicrobial... | at 45.88% |
| 133 | 243aa, >Antimicrobial... | at 47.33% |
| 134 | 255aa, >Antimicrobial... | at 52.16% |
| 135 | 255aa, >Antimicrobial... | at 58.43% |
| 136 | 255aa, >Antimicrobial... | at 71.76% |
| 137 | 229aa, >Antimicrobial... | at 42.79% |
| 138 | 227aa, >Antimicrobial... | at 44.49% |
| 139 | 255aa, >Antimicrobial... | at 54.90% |
| 140 | 252aa, >Antimicrobial... | at 40.48% |
| 141 | 254aa, >Antimicrobial... | at 40.55% |
| 142 | 228aa, >Antimicrobial... | at 45.61% |
| 143 | 251aa, >Antimicrobial... | at 41.04% |
| 144 | 255aa, >Antimicrobial... | at 66.67% |
| 145 | 251aa, >Antimicrobial... | at 40.64% |
| 146 | 225aa, >Antifungal...    | at 45.33% |
| 147 | 248aa, >Antimicrobial... | at 42.34% |
| 148 | 242aa, >Antimicrobial... | at 50.00% |
| 149 | 251aa, >Antimicrobial... | at 62.15% |
| 150 | 232aa, >Antimicrobial... | at 40.95% |
| 151 | 226aa, >Antimicrobial... | at 50.88% |
| 152 | 233aa, >Antimicrobial... | at 47.64% |
| 153 | 255aa, >Antimicrobial... | at 62.75% |
| 154 | 255aa, >Antimicrobial... | at 54.90% |
| 155 | 253aa, >Antimicrobial... | at 43.87% |
| 156 | 251aa, >Antimicrobial... | at 42.63% |
| 157 | 227aa, >Antimicrobial... | at 43.17% |
| 158 | 223aa, >Antimicrobial... | at 41.26% |
| 159 | 255aa, >Antimicrobial... | at 61.57% |
| 160 | 255aa, >Antimicrobial... | at 49.41% |
| 161 | 246aa, >Antimicrobial... | at 45.53% |
| 162 | 248aa, >Antimicrobial... | at 47.98% |
| 163 | 230aa, >Antimicrobial... | at 45.65% |
| 164 | 255aa, >Antimicrobial... | at 43.53% |
| 165 | 242aa, >Antimicrobial... | at 57.44% |
| 166 | 255aa, >Antimicrobial... | at 61.57% |
| 167 | 248aa, >Antimicrobial... | at 47.18% |
| 168 | 240aa, >Antimicrobial... | at 45.00% |
| 169 | 239aa, >Antimicrobial... | at 43.93% |
| 170 | 239aa, >Antimicrobial... | at 44.35% |
| 171 | 248aa, >Antimicrobial... | at 42.34% |
| 172 | 248aa, >Antimicrobial... | at 41.13% |

|     |                          |           |
|-----|--------------------------|-----------|
| 173 | 255aa, >Antimicrobial... | at 60.00% |
| 174 | 255aa, >Antimicrobial... | at 60.00% |
| 175 | 255aa, >Antimicrobial... | *         |
| 176 | 255aa, >Antimicrobial... | at 64.31% |
| 177 | 255aa, >Antimicrobial... | at 63.92% |
| 178 | 255aa, >Antimicrobial... | at 61.57% |
| 179 | 253aa, >Antimicrobial... | at 60.47% |
| 180 | 255aa, >Antimicrobial... | at 55.69% |
| 181 | 255aa, >Antimicrobial... | at 55.29% |
| 182 | 255aa, >Antimicrobial... | at 56.86% |
| 183 | 255aa, >Antimicrobial... | at 61.18% |
| 184 | 255aa, >Antimicrobial... | at 45.88% |
| 185 | 255aa, >Antimicrobial... | at 56.08% |
| 186 | 255aa, >Antimicrobial... | at 60.78% |
| 187 | 255aa, >Antimicrobial... | at 58.82% |
| 188 | 255aa, >Antimicrobial... | at 59.61% |
| 189 | 255aa, >Antimicrobial... | at 61.18% |
| 190 | 255aa, >Antimicrobial... | at 60.39% |
| 191 | 255aa, >Antimicrobial... | at 64.71% |
| 192 | 255aa, >Antimicrobial... | at 61.18% |
| 193 | 255aa, >Antimicrobial... | at 56.86% |
| 194 | 255aa, >Antimicrobial... | at 56.47% |
| 195 | 232aa, >Antimicrobial... | at 45.26% |
| 196 | 255aa, >Antimicrobial... | at 45.49% |
| 197 | 249aa, >Antimicrobial... | at 48.19% |
| 198 | 255aa, >Antimicrobial... | at 50.98% |
| 199 | 242aa, >Antimicrobial... | at 51.65% |
| 200 | 232aa, >Antimicrobial... | at 47.84% |
| 201 | 248aa, >Antimicrobial... | at 47.18% |
| 202 | 246aa, >Antimicrobial... | at 48.78% |
| 203 | 255aa, >Antimicrobial... | *         |
| 204 | 255aa, >Antimicrobial... | at 46.67% |
| 205 | 255aa, >Antimicrobial... | at 52.94% |
| 206 | 255aa, >Antimicrobial... | at 45.10% |
| 207 | 238aa, >Antimicrobial... | at 49.16% |
| 208 | 238aa, >Antimicrobial... | at 48.74% |
| 209 | 255aa, >Antimicrobial... | at 54.51% |
| 210 | 242aa, >Antimicrobial... | at 52.07% |
| 211 | 255aa, >Antimicrobial... | at 49.02% |
| 212 | 255aa, >Antimicrobial... | at 57.65% |
| 213 | 255aa, >Antimicrobial... | at 53.33% |
| 214 | 255aa, >Antimicrobial... | at 54.12% |
| 215 | 255aa, >Antimicrobial... | at 47.06% |
| 216 | 182aa, >Antimicrobial... | at 40.11% |
| 217 | 255aa, >Antimicrobial... | at 55.29% |
| 218 | 255aa, >Antimicrobial... | at 55.29% |
| 219 | 255aa, >Antimicrobial... | at 53.73% |
| 220 | 233aa, >Antimicrobial... | at 46.78% |
| 221 | 255aa, >Antimicrobial... | at 54.90% |
| 222 | 255aa, >Antimicrobial... | at 54.90% |
| 223 | 255aa, >Antimicrobial... | at 57.65% |
| 224 | 228aa, >Antimicrobial... | at 40.35% |
| 225 | 244aa, >Antimicrobial... | at 49.59% |
| 226 | 234aa, >Antimicrobial... | at 47.01% |



227 181aa, >Antimicrobial... \*

228 255aa, >Antimicrobial... at 40.88%

229 255aa, >Antimicrobial... at 58.04%

230 255aa, >Antimicrobial... at 44.31%

231 255aa, >Antimicrobial... at 60.00%

232 255aa, >Antimicrobial... at 59.61%

233 255aa, >Antimicrobial... at 60.78%

234 255aa, >Antimicrobial... at 61.18%

235 255aa, >Antimicrobial... at 58.43%

236 234aa, >Antimicrobial... at 45.73%

237 255aa, >Antimicrobial... at 51.76%

238 255aa, >Antimicrobial... at 54.90%

239 247aa, >Antimicrobial... at 42.91%

240 255aa, >Antimicrobial... at 41.18%

241 255aa, >Antimicrobial... at 55.29%

242 247aa, >Antimicrobial... at 40.08%

243 246aa, >Antimicrobial... at 40.65%

244 244aa, >Antimicrobial... at 40.16%

245 255aa, >Antimicrobial... at 51.37%

246 234aa, >Antimicrobial... at 40.60%

247 255aa, >Antimicrobial... at 55.29%

248 245aa, >Antimicrobial... at 40.82%

249 222aa, >Antimicrobial... at 44.59%

250 255aa, >Antimicrobial... at 54.12%

251 244aa, >Antimicrobial... at 50.82%

252 248aa, >Antimicrobial... at 43.95%

253 255aa, >Antimicrobial... at 42.75%

254 255aa, >Antimicrobial... at 40.39%

255 255aa, >Antimicrobial... at 47.06%

256 255aa, >Antimicrobial... at 40.78%

257 247aa, >Antimicrobial... at 47.77%

258 248aa, >Antimicrobial... at 49.19%

259 252aa, >Antimicrobial... at 52.38%

260 254aa, >Antimicrobial... at 42.91%

261 220aa, >Antimicrobial... at 40.91%

262 232aa, >Antimicrobial... at 46.55%

263 255aa, >Antimicrobial... at 59.22%

264 255aa, >Antimicrobial... at 50.98%

265 228aa, >Antimicrobial... at 41.23%

266 250aa, >Antimicrobial... at 46.80%

267 255aa, >Antimicrobial... at 51.76%

268 255aa, >Antimicrobial... at 51.76%

269 242aa, >Antimicrobial... at 45.45%

270 246aa, >Antimicrobial... at 53.66%

271 246aa, >Antimicrobial... at 52.03%

272 245aa, >Antifungal... at 47.35%

273 242aa, >Antimicrobial... at 47.93%

274 255aa, >Antimicrobial... at 56.86%

275 255aa, >Antimicrobial... at 60.00%

276 244aa, >Antimicrobial... at 47.95%

277 243aa, >Antimicrobial... at 52.67%

278 243aa, >Antimicrobial... at 49.38%

279 247aa, >Antimicrobial... at 49.39%

280 255aa, >Antimicrobial... at 46.27%

281 242aa, >Antimicrobial... \*

282 255aa, >Antimicrobial... at 49.41%

283 255aa, >Antimicrobial... at 50.98%

284 255aa, >Antimicrobial... at 50.20%

285 248aa, >Antimicrobial... at 43.95%

286 246aa, >Antimicrobial... at 45.53%

287 245aa, >Antimicrobial... at 35.00%

288 255aa, >Antimicrobial... at 58.43%

289 255aa, >Antimicrobial... at 40.78%

290 255aa, >Antimicrobial... at 41.18%

291 248aa, >Antimicrobial... at 43.15%

292 255aa, >Antimicrobial... at 58.43%

293 229aa, >Antimicrobial... at 47.60%

294 231aa, >Antimicrobial... at 46.32%

295 149aa, >Antimicrobial... at 53.69%

296 244aa, >Antimicrobial... at 44.26%

297 244aa, >Antimicrobial... at 43.85%

298 255aa, >Antimicrobial... at 57.06%

299 230aa, >Antimicrobial... at 46.96%

300 255aa, >Antimicrobial... at 53.73%

301 255aa, >Antimicrobial... at 54.51%

302 154aa, >Antimicrobial... at 42.86%

303 255aa, >Antimicrobial... at 54.12%

304 255aa, >Antimicrobial... at 52.55%

305 255aa, >Antimicrobial... at 52.16%

306 248aa, >Antimicrobial... at 51.21%

307 246aa, >Antimicrobial... at 40.65%

308 255aa, >Antimicrobial... at 53.33%

309 255aa, >Antimicrobial... at 53.33%

310 255aa, >Antimicrobial... at 60.00%

311 255aa, >Antimicrobial... at 61.96%

312 230aa, >Antimicrobial... at 41.30%

313 255aa, >Antimicrobial... at 60.39%

314 255aa, >Antimicrobial... at 42.35%

315 255aa, >Antimicrobial... at 43.14%

316 255aa, >Antimicrobial... \*

317 250aa, >Antimicrobial... at 47.20%

318 251aa, >Antimicrobial... at 51.79%

319 255aa, >Antimicrobial... at 44.71%

320 171aa, >Antimicrobial... at 40.94%

321 238aa, >Antimicrobial... at 41.18%

322 252aa, >Antimicrobial... at 44.05%

323 248aa, >Antimicrobial... at 45.97%

324 255aa, >Antimicrobial... at 45.10%

325 255aa, >Antimicrobial... at 54.12%

326 248aa, >Antimicrobial... at 47.18%

327 255aa, >Antimicrobial... at 35.00%

328 214aa, >Antimicrobial... at 46.73%

329 151aa, >Antimicrobial... at 45.03%

330 12aa, >antimicrobial... at 41.67%

331 177aa, >Antimicrobial... at 45.76%

332 233aa, >Antimicrobial... at 52.36%

333 180aa, >Antimicrobial... at 42.22%

334 13aa, >Antimicrobial... at 46.15%

```

335 255aa, >Antimicrobial... at 58.82%
336 165aa, >Antimicrobial... at 42.42%
337 26aa, >Antimicrobial... at 53.85%
338 255aa, >Antimicrobial... at 58.43%
339 16aa, >antimicrobial... at 43.75%
340 11aa, >antibacterial06638... at 45.45%
341 20aa, >antibacterial06663... at 45.00%
342 30aa, >antibacterial06947... at 35.00%
343 12aa, >antibacterial08028... at 41.67%
344 18aa, >antibacterial08043... at 50.00%
345 13aa, >antibacterial08158... at 53.85%
346 20aa, >antibacterial08255... at 35.00%
347 15aa, >antibacterial08659... at 35.00%
348 21aa, >antibacterial09060... at 42.86%
349 20aa, >antibacterial09384... at 35.00%
350 15aa, >antibacterial09836... at 35.00%
351 11aa, >antibacterial09870... at 45.45%
352 11aa, >antibacterial10510... at 45.45%
353 26aa, >antibacterial10592... at 42.31%
354 18aa, >antibacterial10700... at 44.44%
355 30aa, >antibacterial10750... at 35.00%
356 12aa, >antibacterial10906... at 41.67%
357 37aa, >antibacterial10910... at 40.54%
358 55aa, >antibacterial10911... at 41.82%
359 14aa, >antibacterial11159... at 42.86%
360 11aa, >antibacterial11203... at 45.45%
361 11aa, >antibacterial11205... at 45.45%
362 14aa, >antibacterial11231... at 42.86%
363 14aa, >antibacterial11236... at 42.86%
364 14aa, >antibacterial11243... at 50.00%
365 15aa, >antibacterial11369... *
366 22aa, >antibacterial11430... at 40.91%
367 19aa, >antibacterial11456... at 52.63%
368 19aa, >antibacterial11459... at 47.37%
369 11aa, >antibacterial11543... *
370 12aa, >antibacterial11722... at 41.67%
371 17aa, >antibacterial11973... at 41.18%
372 12aa, >antibacterial12159... at 41.67%
373 12aa, >antibacterial12473... at 58.33%
374 15aa, >antibacterial12632... at 35.00%
375 12aa, >antibacterial12661... at 41.67%
376 20aa, >antibacterial12684... at 35.00%
377 18aa, >antibacterial12745... at 44.44%
378 15aa, >antibacterial12869... at 35.00%
379 12aa, >antibacterial12913... at 41.67%
380 22aa, >antibacterial13173... at 45.45%
381 17aa, >antibacterial13240... at 41.18%
382 18aa, >antibacterial13361... at 44.44%
>Cluster 20
0 17aa, >anti-Gram+;Antibact... at 41.18%
1 11aa, >antibacterial... at 54.55%
2 255aa, >Antibacterial;Antif... *
3 255aa, >Antibacterial... at 50.20%
4 13aa, >antibacterial;antim... at 53.85%

```

5 16aa, >antibacterial;antif... at 43.75%  
6 13aa, >Antibacterial;antim... at 46.15%  
7 18aa, >Antibacterial;Antif... at 44.44%  
8 13aa, >antimicrobial... at 46.15%  
9 13aa, >antibacterial;antim... \*  
10 14aa, >anti-Gram+;antibact... at 50.00%  
11 24aa, >antimicrobial... at 45.83%  
12 13aa, >antimicrobial... at 46.15%  
13 19aa, >antibacterial;antim... at 42.11%  
14 13aa, >antimicrobial... at 46.15%  
15 14aa, >Antibacterial;antim... at 42.86%  
16 24aa, >antimicrobial... at 41.67%  
17 31aa, >anti-Gram+;antibact... at 41.94%  
18 11aa, >antibacterial;Antif... at 45.45%  
19 22aa, >antimicrobial... at 45.45%  
20 16aa, >Antibacterial... at 43.75%  
21 18aa, >antibacterial;antif... at 44.44%  
22 11aa, >Antiviral... at 45.45%  
23 20aa, >Antifungal... at 50.00%  
24 15aa, >Antifungal;Antimicr... at 53.33%  
25 40aa, >Antimicrobial... at 35.00%  
26 16aa, >anti-Gram+;Antibact... at 43.75%  
27 16aa, >antimicrobial... at 43.75%  
28 255aa, >Antibacterial... at 60.78%  
29 33aa, >antimicrobial... at 42.42%  
30 15aa, >anti-Gram+;Gram-... at 35.00%  
31 20aa, >antibacterial06530... at 35.00%  
32 14aa, >antibacterial06667... at 42.86%  
33 18aa, >antibacterial06972... at 50.00%  
34 23aa, >antibacterial07468... at 43.48%  
35 21aa, >antibacterial07673... at 42.86%  
36 14aa, >antibacterial07768... at 42.86%  
37 18aa, >antibacterial07779... at 50.00%  
38 24aa, >antibacterial07823... at 45.83%  
39 20aa, >antibacterial07939... at 35.00%  
40 22aa, >antibacterial08050... at 40.91%  
41 20aa, >antibacterial08063... at 35.00%  
42 24aa, >antibacterial08127... at 41.67%  
43 22aa, >antibacterial08537... at 40.91%  
44 14aa, >antibacterial08835... at 50.00%  
45 13aa, >antibacterial08899... at 46.15%  
46 13aa, >antibacterial08900... at 53.85%  
47 13aa, >antibacterial09137... at 53.85%  
48 11aa, >antibacterial09185... at 54.55%  
49 11aa, >antibacterial09186... at 45.45%  
50 21aa, >antibacterial09238... at 42.86%  
51 15aa, >antibacterial09268... at 35.00%  
52 15aa, >antibacterial09273... at 46.67%  
53 15aa, >antibacterial09274... at 46.67%  
54 18aa, >antibacterial09327... at 44.44%  
55 11aa, >antibacterial09346... at 45.45%  
56 20aa, >antibacterial09364... at 50.00%  
57 20aa, >antibacterial09383... at 35.00%  
58 20aa, >antibacterial09416... at 45.00%

```

59 20aa, >antibacterial09425... at 45.00%
60 20aa, >antibacterial09437... at 35.00%
61 11aa, >antibacterial09576... at 45.45%
62 15aa, >antibacterial09679... at 46.67%
63 11aa, >antibacterial09747... at 45.45%
64 12aa, >antibacterial09779... at 41.67%
65 13aa, >antibacterial09862... at 46.15%
66 13aa, >antibacterial09864... at 46.15%
67 11aa, >antibacterial09872... at 63.64%
68 11aa, >antibacterial09881... *
69 11aa, >antibacterial09885... at 45.45%
70 11aa, >antibacterial09889... at 45.45%
71 11aa, >antibacterial09922... at 45.45%
72 20aa, >antibacterial09926... at 35.00%
73 12aa, >antibacterial10000... at 41.67%
74 12aa, >antibacterial10005... at 50.00%
75 21aa, >antibacterial10049... at 42.86%
76 17aa, >antibacterial10177... at 41.18%
77 12aa, >antibacterial10234... at 41.67%
78 16aa, >antibacterial10258... at 43.75%
79 19aa, >antibacterial10347... *
80 19aa, >antibacterial10383... at 42.11%
81 13aa, >antibacterial10432... at 46.15%
82 14aa, >antibacterial10478... at 42.86%
83 22aa, >antibacterial10627... at 40.91%
84 13aa, >antibacterial10644... at 46.15%
85 13aa, >antibacterial10687... at 69.23%
86 18aa, >antibacterial10786... at 44.44%
87 20aa, >antibacterial10954... at 45.00%
88 15aa, >antibacterial11153... *
89 15aa, >antibacterial111670... at 35.00%
90 13aa, >antibacterial111957... at 46.15%
91 13aa, >antibacterial112313... at 46.15%
92 18aa, >antibacterial112444... at 44.44%
93 12aa, >antibacterial112465... at 50.00%
94 12aa, >antibacterial112472... at 41.67%
95 14aa, >antibacterial112525... at 64.29%
96 14aa, >antibacterial112526... at 64.29%
97 13aa, >antibacterial112553... at 46.15%
98 12aa, >antibacterial112587... *
99 21aa, >antibacterial112644... at 42.86%
100 15aa, >antibacterial112837... at 53.33%
101 12aa, >antibacterial112879... at 41.67%
102 18aa, >antibacterial112895... at 50.00%
103 15aa, >antibacterial112987... at 46.67%
104 20aa, >antibacterial113217... at 45.00%
105 14aa, >antibacterial113223... at 42.86%
106 20aa, >antibacterial113413... at 50.00%
>Cluster 21
0 255aa, >Antibacterial... *
1 13aa, >antimicrobial... at 46.15%
2 13aa, >antibacterial;antif... at 46.15%
3 11aa, >Antimicrobial... at 45.45%
4 26aa, >antimicrobial... at 46.15%

```

```

5    20aa, >Antibacterial;Antif... at 35.00%
6    21aa, >Anti-Gram-;antibact... at 42.86%
7    12aa, >antimicrobial... at 41.67%
8    19aa, >antibacterial;Antif... at 47.37%
9    18aa, >antimicrobial... at 40.00%
10   16aa, >anti-Gram+;Antibact... at 43.75%
11   255aa, >Antibacterial... at 43.92%
12   11aa, >antimicrobial... at 45.45%
13   12aa, >antimicrobial... at 50.00%
14   14aa, >anti-Gram+;Antibact... at 42.86%
15   14aa, >antibacterial;antim... at 42.86%
16   18aa, >antibacterial06631... at 44.44%
17   11aa, >antibacterial06681... at 45.45%
18   11aa, >antibacterial07732... at 45.45%
19   15aa, >antibacterial08039... at 35.00%
20   15aa, >antibacterial08197... *
21   16aa, >antibacterial08431... at 50.00%
22   24aa, >antibacterial08559... at 41.67%
23   17aa, >antibacterial08576... at 41.18%
24   15aa, >antibacterial08673... at 53.33%
25   15aa, >antibacterial08915... at 46.67%
26   12aa, >antibacterial09032... at 41.67%
27   12aa, >antibacterial09221... at 41.67%
28   20aa, >antibacterial09392... at 35.00%
29   11aa, >antibacterial09468... at 45.45%
30   12aa, >antibacterial10133... at 41.67%
31   14aa, >antibacterial10195... at 42.86%
32   14aa, >antibacterial10208... at 42.86%
33   16aa, >antibacterial10491... at 43.75%
34   11aa, >antibacterial10563... at 45.45%
35   11aa, >antibacterial10583... at 45.45%
36   14aa, >antibacterial10864... at 42.86%
37   12aa, >antibacterial11166... at 41.67%
38   14aa, >antibacterial11250... at 42.86%
39   14aa, >antibacterial11540... at 42.86%
40   15aa, >antibacterial11597... at 46.67%
41   15aa, >antibacterial11751... at 46.67%
42   13aa, >antibacterial11790... at 46.15%
43   14aa, >antibacterial11964... *
44   14aa, >antibacterial11967... at 42.86%
45   13aa, >antibacterial12311... at 46.15%
46   15aa, >antibacterial12363... at 35.00%
47   12aa, >antibacterial12464... at 41.67%
48   20aa, >antibacterial12504... at 35.00%
49   15aa, >antibacterial12948... at 35.00%

```

>Cluster 22

```

0    40aa, >anti-Gram+;antibact... *
1    36aa, >antimicrobial... at 44.44%
2    36aa, >antimicrobial... at 44.44%
3    36aa, >antimicrobial... at 41.67%
4    36aa, >antimicrobial... at 47.22%
5    36aa, >antimicrobial... at 50.00%
6    36aa, >antimicrobial... at 41.67%
7    45aa, >anti-Gram+;Antifung... at 48.89%

```

8 20aa, >Antifungal... at 35.00%  
9 27aa, >Antimicrobial... at 40.74%  
10 36aa, >Antifungal;antimicr... at 41.67%  
11 22aa, >Antifungal... at 40.91%  
12 41aa, >antibacterial;antif... \*  
13 40aa, >antifungal;antimicr... at 67.50%  
14 255aa, >Antifungal... \*  
15 41aa, >antibacterial;antif... at 70.73%  
16 43aa, >antifungal;antimicr... at 65.12%  
17 45aa, >Antifungal;antimicr... at 64.44%  
18 41aa, >antibacterial;antif... at 68.29%  
19 255aa, >Antifungal... at 70.20%  
20 17aa, >Antimicrobial... at 41.18%  
21 15aa, >Antimicrobial... at 35.00%  
22 33aa, >antimicrobial... at 45.45%  
23 33aa, >antimicrobial... at 48.48%  
24 29aa, >antimicrobial... at 41.38%  
25 25aa, >anti-Gram+;antibact... at 35.00%  
26 23aa, >anti-Gram+;antimicr... at 43.48%  
27 30aa, >antimicrobial... at 43.33%  
28 29aa, >antimicrobial... at 44.83%  
29 30aa, >anti-HIV;Antimicrob... at 43.33%  
30 30aa, >Antimicrobial;Antim... at 46.67%  
31 29aa, >antimicrobial... at 41.38%  
32 29aa, >Antimicrobial... at 41.38%  
33 30aa, >Antimicrobial;Antim... at 35.00%  
34 30aa, >antimicrobial... at 43.33%  
35 29aa, >Antimicrobial... at 41.38%  
36 29aa, >Antimicrobial;Antim... at 41.38%  
37 35aa, >Antimicrobial... at 35.00%  
38 44aa, >antifungal;antimicr... at 59.09%  
39 36aa, >antimicrobial... at 47.22%  
40 36aa, >antimicrobial... at 41.67%  
41 41aa, >antifungal;antimicr... at 46.34%  
42 44aa, >antifungal;antimicr... \*  
43 40aa, >antibacterial;antif... at 47.50%  
44 31aa, >Antimicrobial... at 41.94%  
45 14aa, >antimicrobial... at 50.00%  
46 16aa, >antimicrobial... at 43.75%  
47 41aa, >antifungal;antimicr... at 63.41%  
48 40aa, >Antibacterial;Antif... at 42.50%  
49 42aa, >Antimicrobial... at 54.76%  
50 255aa, >Antifungal... at 61.96%  
51 45aa, >Antifungal... at 60.00%  
52 36aa, >antimicrobial... at 52.78%  
53 17aa, >antimicrobial... at 41.18%  
54 243aa, >Antifungal... at 62.14%  
55 29aa, >Antimicrobial... at 41.38%  
56 29aa, >antimicrobial... at 41.38%  
57 35aa, >antifungal;antimicr... at 42.86%  
58 11aa, >Antibacterial... at 45.45%  
59 37aa, >antifungal;antimicr... at 45.95%  
60 16aa, >antibacterial06495... at 43.75%  
61 29aa, >antibacterial06979... at 31.38%

```

62 41aa, >antibacterial07314... *
63 17aa, >antibacterial07694... at 41.18%
64 17aa, >antibacterial08492... at 41.18%
65 13aa, >antibacterial08724... at 46.15%
66 18aa, >antibacterial09006... at 44.44%
67 20aa, >antibacterial09086... at 50.00%
68 11aa, >antibacterial09170... at 45.45%
69 20aa, >antibacterial09442... at 35.00%
70 14aa, >antibacterial09631... at 42.86%
71 18aa, >antibacterial09848... at 50.00%
72 15aa, >antibacterial09923... at 35.00%
73 12aa, >antibacterial10011... at 41.67%
74 12aa, >antibacterial10012... at 41.67%
75 29aa, >antibacterial10782... at 41.38%
76 20aa, >antibacterial10922... at 35.00%
77 11aa, >antibacterial11126... at 45.45%
78 15aa, >antibacterial11277... at 35.00%
79 15aa, >antibacterial11352... at 35.00%
80 23aa, >antibacterial11390... at 43.48%
81 15aa, >antibacterial11433... at 35.00%
82 15aa, >antibacterial11576... at 46.67%
83 16aa, >antibacterial11637... at 56.25%
84 12aa, >antibacterial11663... at 41.67%
85 14aa, >antibacterial11692... at 42.86%
86 14aa, >antibacterial11694... at 50.00%
87 20aa, >antibacterial11718... at 35.00%
88 13aa, >antibacterial12034... at 46.15%
89 13aa, >antibacterial12046... at 46.15%
90 13aa, >antibacterial12052... at 46.15%
91 13aa, >antibacterial12260... at 46.15%
92 13aa, >antibacterial12261... at 46.15%
93 13aa, >antibacterial12270... at 46.15%
94 29aa, >antibacterial12729... at 41.38%
95 29aa, >antibacterial12730... at 44.83%
96 29aa, >antibacterial12800... at 41.38%
97 12aa, >antibacterial13116... at 41.67%
98 15aa, >antibacterial13178... at 46.67%
99 12aa, >antibacterial13195... at 41.67%
100 16aa, >antibacterial13310... at 43.75%
>Cluster 23
0 72aa, >antithrombotic... at 47.22%
1 255aa, >Antibacterial... *
2 24aa, >antibacterial;antif... at 41.67%
3 12aa, >antibacterial;antif... at 41.67%
4 22aa, >antibacterial;antim... at 40.91%
5 22aa, >antimicrobial... at 40.91%
6 68aa, >antithrombotic... at 47.06%
7 17aa, >anti-Gram+;Antibact... at 58.82%
8 30aa, >antimicrobial... at 35.00%
9 37aa, >Antibacterial;Gram-... at 43.24%
10 21aa, >antibacterial;antim... at 42.86%
11 12aa, >Antifungal... at 41.67%
12 12aa, >Antifungal... at 41.67%
13 13aa, >antimicrobial... *

```



14 84aa, >antithrombotic... at 40.48%  
15 15aa, >Antibacterial;Antif... at 46.67%  
16 13aa, >antibacterial07262... at 46.15%  
17 11aa, >antibacterial07390... at 45.45%  
18 15aa, >antibacterial07594... at 35.00%  
19 21aa, >antibacterial07595... at 42.86%  
20 13aa, >antibacterial07671... at 51.54%  
21 17aa, >antibacterial07698... at 41.18%  
22 14aa, >antibacterial07889... at 50.00%  
23 14aa, >antibacterial07897... at 42.86%  
24 13aa, >antibacterial08173... at 46.15%  
25 22aa, >antibacterial08238... \*  
26 11aa, >antibacterial08310... at 45.45%  
27 13aa, >antibacterial08523... at 46.15%  
28 15aa, >antibacterial08633... at 35.00%  
29 12aa, >antibacterial08787... at 50.00%  
30 12aa, >antibacterial09019... at 41.67%  
31 12aa, >antibacterial09030... at 41.67%  
32 13aa, >antibacterial09231... at 46.15%  
33 12aa, >antibacterial09239... at 41.67%  
34 11aa, >antibacterial09356... at 45.45%  
35 20aa, >antibacterial09448... at 35.00%  
36 23aa, >antibacterial09507... at 43.48%  
37 11aa, >antibacterial09623... at 45.45%  
38 13aa, >antibacterial09730... at 46.15%  
39 12aa, >antibacterial09991... at 41.67%  
40 15aa, >antibacterial10072... at 35.00%  
41 11aa, >antibacterial10184... \*  
42 11aa, >antibacterial10185... at 54.55%  
43 12aa, >antibacterial10240... at 41.67%  
44 11aa, >antibacterial10661... at 45.45%  
45 12aa, >antibacterial11172... at 41.67%  
46 14aa, >antibacterial11484... at 42.86%  
47 11aa, >antibacterial11601... at 54.55%  
48 18aa, >antibacterial11614... at 44.44%  
49 18aa, >antibacterial12092... at 50.00%  
50 12aa, >antibacterial12462... at 41.67%  
51 18aa, >antibacterial12552... at 50.00%  
52 18aa, >antibacterial12673... at 50.00%  
53 20aa, >antibacterial12725... at 35.00%  
54 22aa, >antibacterial12769... at 40.91%  
55 15aa, >antibacterial12947... at 35.00%  
56 12aa, >antibacterial12983... at 41.67%  
57 15aa, >antibacterial13046... at 35.00%  
58 12aa, >antibacterial13082... at 41.67%  
59 13aa, >antibacterial13326... at 46.15%  
60 12aa, >antibacterial13409... at 41.67%

>Cluster 24

0 218aa, >Antimicrobial... at 53.67%  
1 201aa, >Antifungal... \*  
2 148aa, >Antifungal... at 47.30%  
3 40aa, >Antifungal... at 57.50%  
4 148aa, >Antifungal... at 52.03%  
5 13aa, >antimicrobial... \*

6 13aa, >antimicrobial... at 61.54%  
7 13aa, >antimicrobial... at 61.54%  
8 11aa, >Antibacterial;Antif... at 45.45%  
9 13aa, >anti-Gram+;Antibact... at 53.85%  
10 13aa, >Antifungal;Antimicr... at 46.15%  
11 15aa, >antimicrobial... at 46.67%  
12 30aa, >Antimicrobial;Antim... at 43.33%  
13 30aa, >Antimicrobial;Antim... at 35.00%  
14 30aa, >antimicrobial... at 43.33%  
15 25aa, >anti-Gram+;anti-HIV... at 35.00%  
16 17aa, >antimicrobial... at 41.18%  
17 11aa, >antimicrobial... at 45.45%  
18 13aa, >Antimicrobial... at 46.15%  
19 16aa, >antibacterial;antim... at 43.75%  
20 176aa, >Antimicrobial... at 53.41%  
21 173aa, >Antimicrobial... at 46.82%  
22 171aa, >Antimicrobial... at 47.95%  
23 173aa, >Antimicrobial... at 46.82%  
24 255aa, >Antimicrobial... \*  
25 255aa, >Antimicrobial... at 60.39%  
26 255aa, >Antimicrobial... at 35.00%  
27 246aa, >Antimicrobial... at 51.22%  
28 255aa, >Antimicrobial... at 41.57%  
29 223aa, >Antimicrobial... at 55.61%  
30 246aa, >Antimicrobial... at 49.59%  
31 173aa, >Antimicrobial... at 47.98%  
32 179aa, >Antimicrobial... at 49.72%  
33 180aa, >Antimicrobial... at 48.89%  
34 178aa, >Antimicrobial... at 52.81%  
35 183aa, >Antimicrobial... at 41.53%  
36 177aa, >Antimicrobial... at 48.59%  
37 245aa, >Antimicrobial... at 41.22%  
38 229aa, >Antimicrobial... \*  
39 173aa, >Antimicrobial... at 46.24%  
40 173aa, >Antimicrobial... at 47.98%  
41 224aa, >Antimicrobial... at 47.77%  
42 246aa, >Antimicrobial... at 48.37%  
43 217aa, >Antimicrobial... at 43.78%  
44 247aa, >Antimicrobial... at 49.80%  
45 183aa, >Antimicrobial... at 40.98%  
46 226aa, >Antimicrobial... at 53.98%  
47 250aa, >Antimicrobial... at 45.20%  
48 225aa, >Antimicrobial... at 54.67%  
49 225aa, >Antimicrobial... at 57.33%  
50 225aa, >Antimicrobial... at 58.67%  
51 246aa, >Antimicrobial... at 48.78%  
52 247aa, >Antimicrobial... at 46.56%  
53 177aa, >Antimicrobial... at 46.33%  
54 228aa, >Antimicrobial... at 42.11%  
55 224aa, >Antimicrobial... at 58.04%  
56 154aa, >Antimicrobial... at 51.95%  
57 225aa, >Antimicrobial... at 52.89%  
58 226aa, >Antimicrobial... at 51.33%  
59 226aa, >Antimicrobial... at 51.33%

60 225aa, >Antimicrobial... at 55.56%  
61 210aa, >Antimicrobial... at 45.71%  
62 246aa, >Antimicrobial... at 43.09%  
63 229aa, >Antimicrobial... at 45.85%  
64 12aa, >antimicrobial... at 41.67%  
65 225aa, >Antimicrobial... at 54.22%  
66 244aa, >Antimicrobial... at 40.16%  
67 233aa, >Antimicrobial... at 46.35%  
68 251aa, >Antimicrobial... at 47.01%  
69 251aa, >Antimicrobial... at 45.42%  
70 250aa, >Antimicrobial... at 46.40%  
71 229aa, >Antimicrobial... at 52.84%  
72 175aa, >Antimicrobial... at 43.43%  
73 225aa, >Antimicrobial... at 54.67%  
74 226aa, >Antimicrobial... at 53.10%  
75 230aa, >Antimicrobial... at 58.70%  
76 251aa, >Antimicrobial... at 46.22%  
77 225aa, >Antimicrobial... at 56.00%  
78 224aa, >Antimicrobial... at 51.34%  
79 220aa, >Antimicrobial... at 44.09%  
80 226aa, >Antimicrobial... at 50.88%  
81 225aa, >Antimicrobial... at 47.11%  
82 222aa, >Antimicrobial... at 58.11%  
83 255aa, >Antimicrobial... at 62.75%  
84 172aa, >Antimicrobial... at 43.60%  
85 240aa, >Antimicrobial... at 52.08%  
86 15aa, >antimicrobial... at 35.00%  
87 177aa, >Antimicrobial... at 52.54%  
88 27aa, >antifungal;antimicr... at 48.15%  
89 12aa, >antibacterial;antif... at 41.67%  
90 17aa, >Antimicrobial... at 41.18%  
91 14aa, >Antimicrobial... at 42.86%  
92 15aa, >Antimicrobial... at 35.00%  
93 30aa, >Antifungal... at 35.00%  
94 15aa, >anti-Gram-;antibact... at 35.00%  
95 180aa, >Antimicrobial... at 47.78%  
96 30aa, >Antimicrobial... at 35.00%  
97 198aa, >Antimicrobial... at 47.47%  
98 22aa, >antibacterial07389... at 45.45%  
99 16aa, >L02A001747... at 43.75%  
100 26aa, >antibacterial07787... at 42.31%  
101 20aa, >antibacterial07972... at 35.00%  
102 17aa, >antibacterial08247... at 41.18%  
103 14aa, >antibacterial08448... at 50.00%  
104 12aa, >antibacterial08990... at 41.67%  
105 13aa, >antibacterial09768... at 46.15%  
106 19aa, >antibacterial09927... at 42.11%  
107 15aa, >antibacterial09989... at 35.00%  
108 13aa, >antibacterial10118... at 46.15%  
109 24aa, >antibacterial10709... at 41.67%  
110 31aa, >antibacterial10858... at 41.94%  
111 15aa, >antibacterial11150... at 35.00%  
112 18aa, >antibacterial11160... at 44.44%  
113 15aa, >antibacterial11163... at 35.00%

```

114 17aa, >antibacterial111190... at 41.18%
115 14aa, >antibacterial11214... at 42.86%
116 15aa, >antibacterial11244... at 35.00%
117 18aa, >antibacterial11264... at 44.44%
118 15aa, >antibacterial11537... at 46.67%
119 12aa, >antibacterial11594... at 41.67%
120 20aa, >antibacterial11618... at 45.00%
121 15aa, >antibacterial11625... at 35.00%
122 20aa, >antibacterial11706... *
123 20aa, >antibacterial11769... at 35.00%
124 20aa, >antibacterial11825... at 50.00%
125 28aa, >antibacterial11853... at 46.43%
126 16aa, >antibacterial11858... at 43.75%
127 17aa, >antibacterial11929... at 41.18%
128 12aa, >antibacterial12447... at 41.67%
129 13aa, >antibacterial12864... at 46.15%
130 20aa, >antibacterial12880... at 35.00%
131 18aa, >antibacterial12894... at 44.44%
132 13aa, >antibacterial12901... at 46.15%
133 20aa, >antibacterial12910... at 35.00%
134 20aa, >antibacterial12954... at 35.00%
135 20aa, >antibacterial12990... at 45.00%
136 15aa, >antibacterial13045... at 46.67%
137 15aa, >antibacterial13059... at 35.00%
138 15aa, >antibacterial13226... at 46.67%
>Cluster 25
0 15aa, >Antifungal... at 35.00%
1 12aa, >antimicrobial... at 41.67%
2 13aa, >antimicrobial... at 46.15%
3 13aa, >antimicrobial... at 46.15%
4 27aa, >Antimicrobial... at 40.74%
5 24aa, >antimicrobial... at 41.67%
6 19aa, >antimicrobial... at 47.37%
7 29aa, >antibacterial;antim... at 41.38%
8 22aa, >antimicrobial... at 40.91%
9 14aa, >antibacterial... at 50.00%
10 21aa, >antimicrobial... at 47.62%
11 29aa, >antibacterial;antif... at 41.38%
12 26aa, >anti-Gram-... at 42.31%
13 15aa, >Antibacterial... at 35.00%
14 14aa, >anti-Gram+;antibact... at 42.86%
15 11aa, >Antibacterial;Antif... at 54.55%
16 255aa, >Antimicrobial... *
17 20aa, >antimicrobial... at 35.00%
18 14aa, >antibacterial... at 42.86%
19 12aa, >antibacterial06986... at 41.67%
20 20aa, >antibacterial07099... at 35.00%
21 11aa, >antibacterial07736... at 54.55%
22 18aa, >antibacterial07780... at 44.44%
23 13aa, >antibacterial08524... at 46.15%
24 19aa, >antibacterial08660... at 42.11%
25 13aa, >antibacterial08706... at 46.15%
26 13aa, >antibacterial08723... at 46.15%
27 13aa, >antibacterial08725... at 46.15%

```

```

28 15aa, >antibacterial08808... at 35.00%
29 15aa, >antibacterial08816... at 46.67%
30 14aa, >antibacterial08852... at 50.00%
31 13aa, >antibacterial08860... at 46.15%
32 12aa, >antibacterial08932... at 41.67%
33 22aa, >antibacterial09044... at 45.45%
34 14aa, >antibacterial09075... at 42.86%
35 14aa, >antibacterial09079... at 42.86%
36 13aa, >antibacterial09133... at 46.15%
37 13aa, >antibacterial09134... at 46.15%
38 13aa, >antibacterial09141... *
39 13aa, >antibacterial09142... at 53.85%
40 14aa, >antibacterial09630... at 42.86%
41 11aa, >antibacterial09823... at 45.45%
42 12aa, >antibacterial10014... at 41.67%
43 18aa, >antibacterial10209... *
44 26aa, >antibacterial10331... at 50.00%
45 15aa, >antibacterial10386... at 35.00%
46 26aa, >antibacterial10387... at 42.31%
47 12aa, >antibacterial10535... at 50.00%
48 14aa, >antibacterial10789... at 42.86%
49 56aa, >antibacterial10799... at 41.07%
50 16aa, >antibacterial10913... at 43.75%
51 20aa, >antibacterial111302... at 35.00%
52 15aa, >antibacterial111367... at 35.00%
53 36aa, >antibacterial111535... at 52.78%
54 15aa, >antibacterial111719... at 46.67%
55 35aa, >antibacterial112006... at 35.00%
56 13aa, >antibacterial112233... at 46.15%
57 36aa, >antibacterial112346... at 44.44%
58 26aa, >antibacterial112433... at 42.31%
59 12aa, >antibacterial112574... at 41.67%
60 12aa, >antibacterial112583... at 41.67%
61 42aa, >antibacterial112678... at 40.48%
62 15aa, >antibacterial112741... at 46.67%
63 18aa, >antibacterial112829... at 44.44%
64 14aa, >antibacterial113051... at 42.86%
65 32aa, >antibacterial113263... at 40.62%
66 20aa, >antibacterial113269... at 35.00%
67 35aa, >antibacterial113320... at 35.00%
68 37aa, >antibacterial113334... at 43.24%
69 36aa, >antibacterial113335... at 41.67%
70 36aa, >antibacterial113337... at 44.44%
71 15aa, >antibacterial113391... at 46.67%
>Cluster 26
0 22aa, >Antimicrobial... at 40.91%
1 13aa, >antibacterial;Antif... *
2 19aa, >Antifungal;antimicr... at 47.37%
3 14aa, >antimicrobial... at 42.86%
4 16aa, >antimicrobial... at 43.75%
5 31aa, >Antibacterial;Antif... at 41.94%
6 27aa, >anti-Gram+;antibact... at 40.74%
7 13aa, >Antibacterial;antim... at 46.15%
8 13aa, >Antimicrobial... at 46.15%

```

```

9      13aa, >antimicrobial... at 53.85%
10     255aa, >Antimicrobial... *
11     255aa, >Antimicrobial... at 71.76%
12     20aa, >antibacterial... at 45.00%
13     15aa, >antifungal;antimicr... at 46.67%
14     32aa, >Antimicrobial... at 40.62%
15     32aa, >antibacterial;antim... at 40.62%
16     20aa, >antibacterial06447... at 35.00%
17     14aa, >antibacterial07047... at 42.86%
18     14aa, >antibacterial07048... at 42.86%
19     30aa, >antibacterial07499... at 35.00%
20     28aa, >antibacterial07996... at 42.86%
21     13aa, >antibacterial08265... at 46.15%
22     17aa, >antibacterial08272... at 41.18%
23     13aa, >antibacterial08377... at 46.15%
24     26aa, >antibacterial08420... at 46.15%
25     23aa, >antibacterial08563... at 43.48%
26     19aa, >antibacterial08568... at 42.11%
27     15aa, >antibacterial08689... at 35.00%
28     17aa, >antibacterial08858... at 41.18%
29     16aa, >antibacterial08865... at 43.75%
30     18aa, >antibacterial08890... at 44.44%
31     12aa, >antibacterial08956... at 41.67%
32     12aa, >antibacterial08957... at 41.67%
33     12aa, >antibacterial08961... at 41.67%
34     20aa, >antibacterial09376... at 35.00%
35     12aa, >antibacterial09957... at 41.67%
36     13aa, >antibacterial10114... at 46.15%
37     14aa, >antibacterial10793... at 42.86%
38     15aa, >antibacterial111258... at 35.00%
39     20aa, >antibacterial111324... at 35.00%
40     20aa, >antibacterial111435... at 35.00%
41     15aa, >antibacterial111490... at 35.00%
42     27aa, >antibacterial111520... at 40.74%
43     20aa, >antibacterial111844... at 35.00%
44     25aa, >antibacterial111946... at 35.00%
45     17aa, >antibacterial112557... *
46     15aa, >antibacterial112858... at 35.00%
47     11aa, >antibacterial112925... at 45.45%

```

>Cluster 27

```

0      17aa, >antimicrobial... at 41.18%
1      16aa, >anti-Gram+;antibact... at 43.75%
2      30aa, >antimicrobial... at 35.00%
3      19aa, >Antimicrobial... at 42.11%
4      26aa, >antimicrobial... at 42.31%
5      14aa, >antimicrobial... at 42.86%
6      14aa, >antimicrobial... at 42.86%
7      17aa, >antimicrobial... *
8      13aa, >Antibacterial;antim... at 46.15%
9      24aa, >antimicrobial... at 41.67%
10     19aa, >anti-Gram+;antifung... at 42.11%
11     19aa, >anti-Gram+;antibact... at 47.37%
12     16aa, >antimicrobial... at 43.75%
13     16aa, >Antibacterial;Antif... at 43.75%

```

14 22aa, >antibacterial;antim... at 40.91%  
15 21aa, >antimicrobial... at 42.86%  
16 12aa, >Antifungal;Antimicr... at 41.67%  
17 12aa, >Antifungal;Antimicr... at 41.67%  
18 30aa, >antimicrobial... at 35.00%  
19 14aa, >antibacterial... at 50.00%  
20 11aa, >Antimicrobial... at 45.45%  
21 255aa, >Antimicrobial... \*  
22 255aa, >Antimicrobial... at 54.51%  
23 156aa, >Antimicrobial... at 51.28%  
24 13aa, >antimicrobial... at 46.15%  
25 13aa, >Antibacterial... at 46.15%  
26 12aa, >Anti-Gram-... at 41.67%  
27 13aa, >antibacterial06625... at 46.15%  
28 21aa, >antibacterial06683... at 42.86%  
29 12aa, >antibacterial07006... at 41.67%  
30 14aa, >antibacterial07019... at 42.86%  
31 12aa, >antibacterial07026... at 41.67%  
32 13aa, >antibacterial07312... at 46.15%  
33 20aa, >antibacterial07328... at 35.00%  
34 18aa, >antibacterial07434... \*  
35 18aa, >antibacterial07435... at 50.00%  
36 17aa, >antibacterial07555... at 41.18%  
37 13aa, >antibacterial07911... at 46.15%  
38 13aa, >antibacterial08147... at 46.15%  
39 13aa, >antibacterial08153... at 53.85%  
40 13aa, >antibacterial08156... at 46.15%  
41 13aa, >antibacterial08159... at 53.85%  
42 13aa, >antibacterial08160... at 53.85%  
43 13aa, >antibacterial08166... at 46.15%  
44 13aa, >antibacterial08178... at 53.85%  
45 13aa, >antibacterial08180... at 46.15%  
46 17aa, >antibacterial08248... at 41.18%  
47 13aa, >antibacterial08312... at 46.15%  
48 18aa, >antibacterial08596... at 44.44%  
49 12aa, >antibacterial08942... at 50.00%  
50 20aa, >antibacterial08958... at 35.00%  
51 14aa, >antibacterial08998... at 50.00%  
52 15aa, >antibacterial09014... at 35.00%  
53 20aa, >antibacterial09997... at 35.00%  
54 18aa, >antibacterial10055... at 44.44%  
55 12aa, >antibacterial10217... at 41.67%  
56 13aa, >antibacterial10482... at 46.15%  
57 12aa, >antibacterial10489... at 41.67%  
58 11aa, >antibacterial10551... at 45.45%  
59 13aa, >antibacterial10763... at 46.15%  
60 16aa, >antibacterial10857... at 43.75%  
61 12aa, >antibacterial11174... at 41.67%  
62 13aa, >antibacterial11175... \*  
63 18aa, >antibacterial11177... at 44.44%  
64 14aa, >antibacterial11235... at 50.00%  
65 18aa, >antibacterial11580... at 50.00%  
66 16aa, >antibacterial11860... at 50.00%  
67 18aa, >antibacterial12556... at 44.44%

```
68 20aa, >antibacterial112697... at 35.00%
69 18aa, >antibacterial112712... at 44.44%
70 15aa, >antibacterial112998... at 35.00%
71 15aa, >antibacterial113014... at 35.00%
72 20aa, >antibacterial113062... at 45.00%
73 20aa, >antibacterial113146... at 35.00%
74 20aa, >antibacterial113262... at 35.00%
75 20aa, >antibacterial113381... at 35.00%
>Cluster 28
0 13aa, >antimicrobial... at 46.15%
1 13aa, >antimicrobial... *
2 30aa, >Antimicrobial... at 43.33%
3 17aa, >antimicrobial... at 41.18%
4 11aa, >Antibacterial... at 45.45%
5 19aa, >Antimicrobial... at 42.11%
6 17aa, >Antimicrobial... at 41.18%
7 17aa, >antimicrobial... at 41.18%
8 15aa, >antimicrobial... at 35.00%
9 13aa, >antimicrobial... at 46.15%
10 13aa, >anti-Gram+;antibact... at 53.85%
11 20aa, >Antibacterial;Antif... at 35.00%
12 15aa, >antimicrobial... *
13 25aa, >antibacterial... at 44.00%
14 22aa, >anti-Gram+;antibact... at 40.91%
15 19aa, >anti-Gram+;antimicr... at 42.11%
16 13aa, >anti-Gram+;antibact... at 53.85%
17 25aa, >anti-Gram+;Antibact... at 35.00%
18 255aa, >Antimicrobial... *
19 13aa, >antimicrobial... at 53.85%
20 11aa, >Antibacterial;Antim... at 45.45%
21 16aa, >antibacterial;antim... at 43.75%
22 12aa, >antibacterial106989... at 41.67%
23 11aa, >antibacterial107660... at 54.55%
24 15aa, >antibacterial107765... at 35.00%
25 12aa, >antibacterial107801... at 41.67%
26 19aa, >antibacterial108059... at 42.11%
27 17aa, >antibacterial108065... at 41.18%
28 23aa, >antibacterial108094... at 43.48%
29 14aa, >antibacterial108408... at 50.00%
30 17aa, >antibacterial108455... at 47.06%
31 14aa, >antibacterial108709... at 42.86%
32 20aa, >antibacterial108919... at 35.00%
33 11aa, >antibacterial109343... at 45.45%
34 20aa, >antibacterial109360... at 45.00%
35 20aa, >antibacterial109420... at 35.00%
36 20aa, >antibacterial109432... at 45.00%
37 20aa, >antibacterial109439... at 35.00%
38 13aa, >antibacterial109589... at 53.85%
39 12aa, >antibacterial109811... at 41.67%
40 11aa, >antibacterial110509... at 45.45%
41 15aa, >antibacterial110570... at 53.33%
42 19aa, >antibacterial110602... at 42.11%
43 11aa, >antibacterial110674... at 45.45%
44 12aa, >antibacterial111179... at 41.67%
```



45 14aa, >antibacterial11249... at 42.86%  
 46 15aa, >antibacterial11261... at 35.00%  
 47 16aa, >antibacterial11275... at 43.75%  
 48 29aa, >antibacterial11382... at 41.38%  
 49 15aa, >antibacterial11760... at 35.00%  
 50 15aa, >antibacterial11840... at 35.00%  
 51 15aa, >antibacterial11953... at 46.67%  
 52 14aa, >antibacterial12005... at 42.86%  
 53 13aa, >antibacterial12202... at 46.15%  
 54 13aa, >antibacterial12214... at 46.15%  
 55 13aa, >antibacterial12218... at 46.15%  
 56 17aa, >antibacterial12385... \*  
 57 12aa, >antibacterial12584... at 41.67%  
 58 12aa, >antibacterial12589... at 41.67%  
 59 12aa, >antibacterial12604... at 41.67%  
 60 14aa, >antibacterial12606... at 42.86%  
 61 13aa, >antibacterial12821... at 36.15%  
 62 13aa, >antibacterial12979... at 36.15%  
 63 20aa, >antibacterial13161... at 45.00%

>Cluster 29

0 15aa, >Antifungal;Antivira... \*  
 1 30aa, >antimicrobial;antiv... at 35.00%  
 2 30aa, >antimicrobial;antiv... at 43.33%  
 3 34aa, >Antifungal;antimicr... at 50.00%  
 4 13aa, >Antibacterial... at 46.15%  
 5 27aa, >antimicrobial... at 44.44%  
 6 24aa, >Antimicrobial... at 45.83%  
 7 21aa, >antibacterial;Antif... at 42.86%  
 8 21aa, >antibacterial;antif... at 42.86%  
 9 29aa, >antimicrobial... at 41.38%  
 10 13aa, >antimicrobial;Antiv... at 46.15%  
 11 11aa, >Antimicrobial... at 45.45%  
 12 13aa, >anti-Gram+;antimicr... at 46.15%  
 13 11aa, >Antibacterial;Antim... at 45.45%  
 14 255aa, >Antimicrobial... \*  
 15 236aa, >Antimicrobial... at 46.19%  
 16 255aa, >Antimicrobial... at 41.57%  
 17 255aa, >Antimicrobial... at 41.18%  
 18 245aa, >Antimicrobial... at 42.04%  
 19 247aa, >Antimicrobial... at 43.32%  
 20 255aa, >Antimicrobial... at 43.53%  
 21 255aa, >Antimicrobial... at 40.39%  
 22 245aa, >Antimicrobial... at 44.08%  
 23 245aa, >Antimicrobial... at 43.67%  
 24 255aa, >Antimicrobial... at 41.96%  
 25 255aa, >Antimicrobial... at 43.53%  
 26 245aa, >Antimicrobial... at 44.08%  
 27 255aa, >Antimicrobial... at 55.29%  
 28 11aa, >antithrombotic... at 45.45%  
 29 17aa, >anti-Gram-;antibact... at 41.18%  
 30 29aa, >antimicrobial... at 41.38%  
 31 14aa, >Antibacterial... at 42.86%  
 32 20aa, >antibacterial06492... at 35.00%  
 33 30aa, >L02A001785... \*

```

34 12aa, >antibacterial07029... at 41.67%
35 18aa, >antibacterial07811... at 44.44%
36 30aa, >antibacterial07846... at 35.00%
37 24aa, >antibacterial08035... at 45.83%
38 22aa, >antibacterial08036... at 40.91%
39 19aa, >antibacterial08049... at 42.11%
40 13aa, >antibacterial08163... at 46.15%
41 13aa, >antibacterial08190... at 46.15%
42 13aa, >antibacterial08191... at 46.15%
43 15aa, >antibacterial08685... at 35.00%
44 12aa, >antibacterial08920... at 41.67%
45 20aa, >antibacterial09087... at 45.00%
46 20aa, >antibacterial09092... at 45.00%
47 20aa, >antibacterial09097... at 35.00%
48 19aa, >antibacterial09672... at 42.11%
49 13aa, >antibacterial10210... at 46.15%
50 29aa, >antibacterial10737... at 41.38%
51 19aa, >antibacterial10900... at 42.11%
52 15aa, >antibacterial11256... at 35.00%
53 30aa, >antibacterial11414... at 43.33%
54 14aa, >antibacterial11486... at 42.86%
55 19aa, >antibacterial11659... at 42.11%
56 24aa, >antibacterial11679... at 45.83%
57 16aa, >antibacterial11683... at 50.00%
58 17aa, >antibacterial11755... at 47.06%
59 20aa, >antibacterial11911... at 45.00%
60 22aa, >antibacterial12117... *
61 13aa, >antibacterial12252... at 46.15%
62 26aa, >antibacterial12362... at 46.15%
63 20aa, >antibacterial12394... at 35.00%
64 13aa, >antibacterial12512... at 53.85%
65 20aa, >antibacterial12695... at 45.00%
66 15aa, >antibacterial13040... at 53.33%
67 12aa, >antibacterial13049... at 41.67%
68 20aa, >antibacterial13163... at 35.00%
69 15aa, >antibacterial13213... at 35.00%
>Cluster 30
0 24aa, >Antibacterial... at 41.67%
1 19aa, >Antibacterial... *
2 17aa, >antibacterial;antim... at 41.18%
3 18aa, >antibacterial;antim... at 44.44%
4 12aa, >Antibacterial... at 41.67%
5 21aa, >antibacterial;Antif... at 42.86%
6 27aa, >antimicrobial.... at 40.74%
7 23aa, >Antimicrobial... *
8 255aa, >Antimicrobial... *
9 11aa, >antibacterial07733... at 45.45%
10 16aa, >antibacterial07739... at 43.75%
11 18aa, >antibacterial08056... at 44.44%
12 11aa, >antibacterial08227... at 45.45%
13 11aa, >antibacterial08296... at 45.45%
14 14aa, >antibacterial08641... at 50.00%
15 11aa, >antibacterial09181... at 45.45%
16 25aa, >antibacterial09345... at 35.00%

```

```

17 14aa, >antibacterial09467... at 42.86%
18 18aa, >antibacterial10417... at 44.44%
19 16aa, >antibacterial10492... at 43.75%
20 13aa, >antibacterial11271... *
21 15aa, >antibacterial11947... at 35.00%
22 16aa, >antibacterial12414... at 43.75%
23 34aa, >antibacterial12672... at 41.18%
24 15aa, >antibacterial12824... at 35.00%
25 14aa, >antibacterial13076... at 42.86%
26 25aa, >antibacterial13325... at 35.00%
>Cluster 31
0 17aa, >anti-Gram-... at 47.06%
1 24aa, >Antibacterial;Antif... at 41.67%
2 11aa, >Antimicrobial;Antim... *
3 24aa, >antimicrobial... at 45.83%
4 24aa, >antibacterial;Antif... at 41.67%
5 24aa, >antifungal;antimicr... at 41.67%
6 24aa, >anti-Gram+;Antibact... at 41.67%
7 11aa, >Antimicrobial;Antim... at 45.45%
8 25aa, >Antibacterial;antim... at 35.00%
9 18aa, >antimicrobial... at 44.44%
10 16aa, >anti-Gram-;antibact... at 50.00%
11 255aa, >Antibacterial... *
12 255aa, >Antimicrobial... at 72.94%
13 255aa, >Antimicrobial... at 41.96%
14 255aa, >Antimicrobial... at 75.29%
15 255aa, >Antimicrobial... at 56.08%
16 255aa, >Antimicrobial... at 49.41%
17 255aa, >Antimicrobial... at 43.14%
18 255aa, >Antimicrobial... at 54.12%
19 255aa, >Antimicrobial... at 51.37%
20 19aa, >antimicrobial... at 42.11%
21 20aa, >anti-Gram+;antibact... at 35.00%
22 16aa, >antimicrobial... at 43.75%
23 11aa, >antibacterial;antim... at 45.45%
24 14aa, >antimicrobial... at 42.86%
25 15aa, >antimicrobial... at 35.00%
26 13aa, >antimicrobial... at 46.15%
27 13aa, >antibacterial08148... *
28 13aa, >antibacterial08155... at 53.85%
29 13aa, >antibacterial08157... at 53.85%
30 13aa, >antibacterial08179... at 46.15%
31 15aa, >antibacterial08827... at 35.00%
32 18aa, >antibacterial09007... at 44.44%
33 18aa, >antibacterial09008... at 44.44%
34 14aa, >antibacterial09078... at 42.86%
35 17aa, >antibacterial09172... at 41.18%
36 20aa, >antibacterial09409... at 35.00%
37 20aa, >antibacterial09415... at 35.00%
38 16aa, >antibacterial09497... at 43.75%
39 14aa, >antibacterial09638... at 50.00%
40 15aa, >antibacterial09681... at 46.67%
41 11aa, >antibacterial09817... at 45.45%
42 15aa, >antibacterial10153... at 35.00%

```

```

43 15aa, >antibacterial10158... at 46.67%
44 15aa, >antibacterial10160... at 35.00%
45 15aa, >antibacterial10162... at 35.00%
46 15aa, >antibacterial10163... at 35.00%
47 15aa, >antibacterial10169... at 46.67%
48 15aa, >antibacterial10174... at 35.00%
49 14aa, >antibacterial10639... at 42.86%
50 11aa, >antibacterial11148... at 45.45%
51 15aa, >antibacterial11473... *
52 21aa, >antibacterial11514... at 42.86%
53 12aa, >antibacterial11527... at 50.00%
54 17aa, >antibacterial11651... at 41.18%
55 19aa, >antibacterial12412... at 42.11%
56 15aa, >antibacterial12611... at 35.00%
57 12aa, >antibacterial13410... at 50.00%
>Cluster 32
0 23aa, >antifungal;antimicr... at 43.48%
1 11aa, >antibacterial... *
2 13aa, >anti-Gram+;antibact... at 46.15%
3 21aa, >antimicrobial... at 42.86%
4 11aa, >Antibacterial;Antif... at 44.55%
5 24aa, >anti-Gram-;antibact... at 41.67%
6 21aa, >Antimicrobial... at 47.62%
7 255aa, >Antibacterial... *
8 17aa, >antimicrobial... at 41.18%
9 18aa, >antibacterial;Antif... at 44.44%
10 20aa, >anti-Gram+;antibact... at 35.00%
11 16aa, >antibacterial... at 43.75%
12 13aa, >antifungal;antimicr... at 46.15%
13 13aa, >antibacterial06479... at 46.15%
14 32aa, >antibacterial06795... at 40.62%
15 11aa, >antibacterial07696... at 45.45%
16 15aa, >antibacterial07716... at 35.00%
17 15aa, >antibacterial07717... at 35.00%
18 15aa, >antibacterial07719... at 35.00%
19 15aa, >antibacterial07720... at 35.00%
20 12aa, >antibacterial08117... *
21 12aa, >antibacterial08321... at 41.67%
22 12aa, >antibacterial08334... at 41.67%
23 20aa, >antibacterial08581... at 35.00%
24 18aa, >antibacterial08614... at 50.00%
25 18aa, >antibacterial08615... at 44.44%
26 18aa, >antibacterial08617... at 50.00%
27 17aa, >antibacterial08671... at 41.18%
28 15aa, >antibacterial08696... at 35.00%
29 17aa, >antibacterial08710... at 41.18%
30 12aa, >antibacterial08985... at 41.67%
31 12aa, >antibacterial08988... at 41.67%
32 17aa, >antibacterial09173... at 41.18%
33 19aa, >antibacterial10391... at 42.11%
34 11aa, >antibacterial10578... at 54.55%
35 30aa, >antibacterial10618... at 43.33%
36 15aa, >antibacterial11323... at 46.67%
37 15aa, >antibacterial11894... at 35.00%

```

```

38 15aa, >antibacterial12033... at 35.00%
39 11aa, >antibacterial12847... at 54.55%
40 20aa, >antibacterial12898... at 35.00%
41 20aa, >antibacterial13025... at 35.00%
42 20aa, >antibacterial13071... at 35.00%
43 20aa, >antibacterial13304... at 35.00%
44 12aa, >antibacterial13366... at 41.67%
>Cluster 33
0 15aa, >antimicrobial... at 35.00%
1 21aa, >anti-Gram-;Antimicr... at 47.62%
2 13aa, >anti-Gram+;antibact... at 46.15%
3 255aa, >Antimicrobial... *
4 11aa, >Antimicrobial... at 45.45%
5 19aa, >Antimicrobial... at 42.11%
6 13aa, >antibacterial07827... at 46.15%
7 13aa, >antibacterial08152... at 46.15%
8 15aa, >antibacterial08651... at 35.00%
9 11aa, >antibacterial09643... at 45.45%
10 12aa, >antibacterial10068... at 50.00%
11 13aa, >antibacterial10119... at 46.15%
12 32aa, >antibacterial10605... at 40.62%
13 16aa, >antibacterial11541... at 43.75%
14 20aa, >antibacterial12127... at 35.00%
15 13aa, >antibacterial12315... *
16 13aa, >antibacterial12329... at 46.15%
17 13aa, >antibacterial12330... at 46.15%
18 15aa, >antibacterial12820... at 35.00%
19 13aa, >antibacterial12960... at 46.15%
20 21aa, >antibacterial13024... at 42.86%
21 11aa, >antibacterial13342... at 45.45%
>Cluster 34
0 28aa, >anti-Gram+;antibact... at 42.86%
1 13aa, >antimicrobial... at 46.15%
2 13aa, >antimicrobial... at 46.15%
3 17aa, >Antibacterial;antim... at 47.06%
4 16aa, >Antibacterial... at 43.75%
5 20aa, >Antibacterial;antim... at 50.00%
6 26aa, >anti-Gram+;antibact... at 46.15%
7 11aa, >antimicrobial... at 54.55%
8 13aa, >antibacterial;Antif... at 53.85%
9 13aa, >antibacterial;antim... *
10 18aa, >antibacterial;antif... at 50.00%
11 20aa, >antibacterial;antim... at 35.00%
12 30aa, >antibacterial;antim... at 35.00%
13 27aa, >antimicrobial... at 40.74%
14 25aa, >anti-Gram+;antibact... at 35.00%
15 17aa, >antibacterial;antim... at 41.18%
16 15aa, >Antibacterial... at 35.00%
17 255aa, >Antiviral... *
18 255aa, >Antiviral... at 76.86%
19 255aa, >Antiviral... at 75.69%
20 255aa, >Antiviral... at 77.25%
21 15aa, >Antimicrobial... at 46.67%
22 12aa, >antibacterial06666... at 50.00%

```

```

23 20aa, >L02A001911... at 35.00%
24 19aa, >antibacterial07881... at 42.11%
25 25aa, >antibacterial08006... at 35.00%
26 11aa, >antibacterial08284... at 45.45%
27 14aa, >antibacterial08397... at 42.86%
28 14aa, >antibacterial08398... at 42.86%
29 20aa, >antibacterial08482... at 35.00%
30 12aa, >antibacterial08507... at 41.67%
31 12aa, >antibacterial08566... at 41.67%
32 12aa, >antibacterial09040... at 41.67%
33 12aa, >antibacterial09049... at 41.67%
34 14aa, >antibacterial09166... at 42.86%
35 11aa, >antibacterial09319... at 45.45%
36 20aa, >antibacterial09377... at 35.00%
37 13aa, >antibacterial09540... at 53.85%
38 18aa, >antibacterial09664... at 44.44%
39 20aa, >antibacterial10086... *
40 21aa, >antibacterial10454... at 42.86%
41 11aa, >antibacterial10508... at 45.45%
42 13aa, >antibacterial11418... at 53.85%
43 16aa, >antibacterial11515... at 43.75%
44 13aa, >antibacterial11627... at 53.85%
45 22aa, >antibacterial11889... at 40.91%
46 19aa, >antibacterial12024... at 42.11%
47 13aa, >antibacterial12077... at 53.85%
48 15aa, >antibacterial12411... at 35.00%
49 12aa, >antibacterial12572... at 41.67%
50 12aa, >antibacterial13119... at 41.67%
51 12aa, >antibacterial13214... at 41.67%
52 15aa, >antibacterial13264... at 35.00%
53 15aa, >antibacterial13374... at 46.67%
>Cluster 35
0 20aa, >antimicrobial... at 35.00%
1 21aa, >antimicrobial... at 42.86%
2 21aa, >antimicrobial... at 42.86%
3 21aa, >anti-Gram+;antibact... *
4 21aa, >anti-Gram+;antibact... at 47.62%
5 38aa, >Antibacterial;Antif... at 42.11%
6 21aa, >antimicrobial... at 42.86%
7 21aa, >Antibacterial;Antif... at 47.62%
8 15aa, >antibacterial... at 35.00%
9 20aa, >antibacterial;antim... at 45.00%
10 11aa, >Antibacterial... at 45.45%
11 255aa, >Antimicrobial... *
12 12aa, >anti-Gram-;antibact... at 50.00%
13 22aa, >antimicrobial... at 40.91%
14 22aa, >antibacterial;antim... at 45.45%
15 32aa, >anti-Gram+;antifung... at 43.75%
16 13aa, >antibacterial06527... at 46.15%
17 17aa, >antibacterial06565... at 41.18%
18 11aa, >antibacterial06620... at 45.45%
19 24aa, >antibacterial06652... at 41.67%
20 12aa, >antibacterial06987... at 50.00%
21 14aa, >antibacterial06995... at 42.86%

```

```

22 14aa, >antibacterial06996... at 42.86%
23 13aa, >antibacterial07000... at 46.15%
24 12aa, >antibacterial07004... at 41.67%
25 12aa, >antibacterial07005... at 50.00%
26 12aa, >antibacterial07012... at 50.00%
27 13aa, >antibacterial07569... at 46.15%
28 12aa, >antibacterial07571... at 41.67%
29 16aa, >antibacterial07682... at 43.75%
30 11aa, >antibacterial07713... at 45.45%
31 15aa, >antibacterial08718... at 35.00%
32 24aa, >antibacterial08844... at 45.83%
33 27aa, >antibacterial08924... at 40.74%
34 27aa, >antibacterial08925... at 40.74%
35 13aa, >antibacterial09584... at 46.15%
36 13aa, >antibacterial09601... *
37 20aa, >antibacterial10951... at 35.00%
38 20aa, >antibacterial10953... at 35.00%
39 13aa, >antibacterial11202... at 46.15%
40 18aa, >antibacterial11617... at 44.44%
41 21aa, >antibacterial11795... at 42.86%
42 15aa, >antibacterial11892... at 35.00%
43 13aa, >antibacterial12048... at 46.15%
44 13aa, >antibacterial12055... at 46.15%
45 13aa, >antibacterial12067... at 53.85%
46 13aa, >antibacterial12101... at 46.15%
47 20aa, >antibacterial12124... at 45.00%
48 13aa, >antibacterial12425... at 46.15%
49 18aa, >antibacterial12607... at 44.44%
50 20aa, >antibacterial12713... at 35.00%
51 29aa, >antibacterial12760... at 41.38%
52 19aa, >antibacterial13131... at 42.11%
53 20aa, >antibacterial13181... at 35.00%
>Cluster 36
0 30aa, >Antimicrobial... at 43.33%
1 21aa, >Antimicrobial... *
2 21aa, >anti-HIV;antimicrob... at 52.38%
3 21aa, >anti-HIV;Antimicrob... at 52.38%
4 17aa, >Antibacterial;antim... at 52.94%
5 24aa, >antimicrobial... at 41.67%
6 24aa, >Antimicrobial... at 41.67%
7 15aa, >antibacterial;antim... at 35.00%
8 24aa, >antimicrobial... at 41.67%
9 24aa, >antimicrobial... at 41.67%
10 24aa, >antibacterial;Antif... at 41.67%
11 24aa, >antibacterial;Antif... at 41.67%
12 24aa, >antibacterial;Antif... at 50.00%
13 24aa, >anti-Gram+;Antibact... at 41.67%
14 24aa, >antimicrobial... at 41.67%
15 17aa, >Antimicrobial... *
16 24aa, >antibacterial;Antif... at 41.67%
17 24aa, >anti-Gram+;Antibact... at 45.83%
18 20aa, >antibacterial;Antif... at 45.00%
19 14aa, >Antimicrobial... at 42.86%
20 28aa, >anti-Gram-;Antibact... at 46.43%

```

21 31aa, >Gram-... at 41.94%  
22 255aa, >Antimicrobial... \*  
23 255aa, >Antimicrobial... at 42.75%  
24 255aa, >Antimicrobial... at 52.16%  
25 255aa, >Antimicrobial... at 46.67%  
26 211aa, >Antimicrobial... at 45.50%  
27 255aa, >Antimicrobial... at 52.16%  
28 14aa, >Antibacterial;Antim... at 42.86%  
29 43aa, >anti-Gram+;antibact... at 44.19%  
30 13aa, >antibacterial06478... at 46.15%  
31 40aa, >antibacterial07326... at 35.00%  
32 14aa, >antibacterial07463... at 42.86%  
33 16aa, >antibacterial07585... at 43.75%  
34 15aa, >antibacterial07764... at 35.00%  
35 20aa, >antibacterial07994... at 35.00%  
36 18aa, >antibacterial08592... at 44.44%  
37 18aa, >antibacterial08613... at 44.44%  
38 14aa, >antibacterial08995... at 42.86%  
39 13aa, >antibacterial09072... at 46.15%  
40 24aa, >antibacterial09508... at 41.67%  
41 24aa, >antibacterial09724... at 41.67%  
42 12aa, >antibacterial10066... at 41.67%  
43 15aa, >antibacterial10069... at 35.00%  
44 29aa, >antibacterial11385... at 41.38%  
45 24aa, >antibacterial11707... at 45.83%  
46 24aa, >antibacterial11708... at 41.67%  
47 27aa, >antibacterial11875... at 40.74%  
48 15aa, >antibacterial11958... at 35.00%  
49 20aa, >antibacterial12009... at 45.00%  
50 25aa, >antibacterial12625... at 44.00%  
51 25aa, >antibacterial12626... at 35.00%  
52 18aa, >antibacterial13172... at 44.44%  
53 20aa, >antibacterial13192... at 45.00%

>Cluster 37

0 13aa, >antimicrobial... \*  
1 18aa, >antimicrobial... at 44.44%  
2 19aa, >anti-Gram+;antibact... at 42.11%  
3 13aa, >antibacterial;antim... at 46.15%  
4 12aa, >anti-Gram-;antibact... at 41.67%  
5 18aa, >anti-Gram-;antibact... at 44.44%  
6 21aa, >antimicrobial... at 42.86%  
7 255aa, >Antimicrobial... \*  
8 21aa, >antimicrobial... at 47.62%  
9 24aa, >Antimicrobial... at 41.67%  
10 20aa, >antimicrobial... at 35.00%  
11 22aa, >antibacterial06543... at 40.91%  
12 20aa, >antibacterial06651... at 35.00%  
13 28aa, >antibacterial07071... at 50.00%  
14 25aa, >antibacterial07271... at 44.00%  
15 25aa, >antibacterial07272... at 48.00%  
16 12aa, >antibacterial07382... at 41.67%  
17 13aa, >antibacterial07849... at 46.15%  
18 11aa, >antibacterial08111... at 45.45%  
19 17aa, >antibacterial08277... at 41.18%



```

20 11aa, >antibacterial08302... at 45.45%
21 12aa, >antibacterial08311... at 41.67%
22 14aa, >antibacterial08315... at 42.86%
23 17aa, >antibacterial08331... at 41.18%
24 16aa, >antibacterial08355... at 43.75%
25 14aa, >antibacterial08372... at 42.86%
26 14aa, >antibacterial08373... at 42.86%
27 13aa, >antibacterial08382... at 53.85%
28 13aa, >antibacterial08383... at 53.85%
29 14aa, >antibacterial08399... *
30 11aa, >antibacterial08804... at 45.45%
31 12aa, >antibacterial08955... at 41.67%
32 19aa, >antibacterial09180... at 42.11%
33 12aa, >antibacterial09270... at 41.67%
34 11aa, >antibacterial09311... at 45.45%
35 11aa, >antibacterial09330... at 45.45%
36 16aa, >antibacterial09803... at 43.75%
37 17aa, >antibacterial09913... at 41.18%
38 12aa, >antibacterial10006... at 41.67%
39 18aa, >antibacterial10228... at 44.44%
40 21aa, >antibacterial10289... *
41 11aa, >antibacterial10595... at 42.86%
42 13aa, >antibacterial11311... at 46.15%
43 20aa, >antibacterial11491... at 35.00%
44 20aa, >antibacterial11578... at 35.00%
45 20aa, >antibacterial11752... at 35.00%
46 20aa, >antibacterial11816... at 35.00%
47 15aa, >antibacterial12555... at 35.00%
48 15aa, >antibacterial12635... at 35.00%
49 15aa, >antibacterial12651... at 35.00%
50 14aa, >antibacterial12656... at 42.86%
51 15aa, >antibacterial12679... at 35.00%
52 15aa, >antibacterial12862... at 46.67%
53 15aa, >antibacterial13179... at 35.00%
54 18aa, >antibacterial13219... at 44.44%
55 12aa, >antibacterial13323... at 50.00%
>Cluster 38
0 30aa, >anti-Gram+;Antibact... at 35.00%
1 24aa, >antimicrobial... at 50.00%
2 18aa, >anti-Gram+;Antibact... at 44.44%
3 13aa, >antibacterial;antim... *
4 29aa, >antimicrobial... at 41.38%
5 21aa, >anti-Gram+;Antibact... at 42.86%
6 29aa, >antimicrobial... at 41.38%
7 19aa, >Antimicrobial... at 47.37%
8 13aa, >Antibacterial;antim... at 53.85%
9 255aa, >Antimicrobial... *
10 35aa, >anti-Gram+;Antifung... at 35.00%
11 17aa, >antibacterial;antim... at 41.18%
12 18aa, >antibacterial07557... at 44.44%
13 13aa, >antibacterial07747... at 46.15%
14 29aa, >antibacterial07792... at 41.38%
15 15aa, >antibacterial08692... at 35.00%
16 13aa, >antibacterial08893... at 46.15%

```

```

17 19aa, >antibacterial09286... at 42.11%
18 20aa, >antibacterial09385... at 35.00%
19 20aa, >antibacterial09406... at 45.00%
20 20aa, >antibacterial09417... at 45.00%
21 11aa, >antibacterial09698... *
22 12aa, >antibacterial09790... at 41.67%
23 12aa, >antibacterial10128... at 41.67%
24 22aa, >antibacterial10445... at 40.91%
25 12aa, >antibacterial10667... at 41.67%
26 17aa, >antibacterial10874... at 41.18%
27 13aa, >antibacterial11201... at 46.15%
28 13aa, >antibacterial112158... at 46.15%
29 13aa, >antibacterial112230... at 46.15%
30 25aa, >antibacterial112637... at 35.00%
31 20aa, >antibacterial113088... at 50.00%
>Cluster 39
0 25aa, >antibacterial;Antif... at 35.00%
1 13aa, >antimicrobial... at 53.85%
2 32aa, >antimicrobial... at 40.62%
3 15aa, >antimicrobial... *
4 255aa, >Antimicrobial... *
5 255aa, >Antimicrobial... at 57.65%
6 255aa, >Antimicrobial... at 44.31%
7 255aa, >Antimicrobial... at 59.22%
8 255aa, >Antimicrobial... at 57.25%
9 17aa, >Antimicrobial... at 41.18%
10 17aa, >antimicrobial... at 41.18%
11 13aa, >antimicrobial... at 46.15%
12 14aa, >antibacterial06966... at 50.00%
13 11aa, >antibacterial07712... at 45.45%
14 15aa, >antibacterial08317... at 35.00%
15 15aa, >antibacterial08320... at 35.00%
16 12aa, >antibacterial08465... at 41.67%
17 12aa, >antibacterial09518... at 66.67%
18 12aa, >antibacterial09520... at 50.00%
19 12aa, >antibacterial09521... at 41.67%
20 13aa, >antibacterial09732... at 46.15%
21 23aa, >antibacterial10893... at 43.48%
22 14aa, >antibacterial111237... at 42.86%
23 15aa, >antibacterial111259... at 35.00%
24 19aa, >antibacterial111391... at 42.11%
25 18aa, >antibacterial111416... *
26 15aa, >antibacterial111443... at 35.00%
27 20aa, >antibacterial111474... at 45.00%
28 14aa, >antibacterial111621... at 42.86%
29 13aa, >antibacterial111924... at 53.85%
30 12aa, >antibacterial112912... at 41.67%
>Cluster 40
0 13aa, >antimicrobial... *
1 31aa, >anti-Gram+;antibact... at 41.94%
2 16aa, >antibacterial;antif... at 43.75%
3 14aa, >antimicrobial... at 42.86%
4 14aa, >anti-Gram-;anti-HIV... at 42.86%
5 24aa, >Antifungal... at 41.67%

```

6 13aa, >antimicrobial... at 46.15%  
7 20aa, >antibacterial;antim... at 45.00%  
8 20aa, >antibacterial;antim... at 35.00%  
9 24aa, >Antibacterial;Antif... at 41.67%  
10 13aa, >anti-Gram+;Antibact... at 46.15%  
11 17aa, >antibacterial;antim... at 41.18%  
12 19aa, >Antibacterial... at 47.37%  
13 20aa, >antibacterial;antim... at 35.00%  
14 20aa, >Gram-... at 35.00%  
15 28aa, >antibacterial;antim... at 42.86%  
16 16aa, >antimicrobial... at 50.00%  
17 248aa, >Antimicrobial... \*  
18 248aa, >Antimicrobial... at 63.31%  
19 247aa, >Antimicrobial... at 64.37%  
20 249aa, >Antimicrobial... at 62.65%  
21 248aa, >Antimicrobial... at 64.92%  
22 254aa, >Antimicrobial... at 57.09%  
23 254aa, >Antimicrobial... at 64.17%  
24 249aa, >Antimicrobial... at 67.07%  
25 255aa, >Antimicrobial... \*  
26 254aa, >Antimicrobial... at 70.87%  
27 255aa, >Antimicrobial... at 46.27%  
28 252aa, >Antimicrobial... at 51.19%  
29 60aa, >Antimicrobial... at 35.00%  
30 255aa, >Antimicrobial... at 43.53%  
31 255aa, >Antimicrobial... at 40.78%  
32 255aa, >Antimicrobial... at 41.18%  
33 255aa, >Antimicrobial... at 47.06%  
34 14aa, >Antimicrobial... at 42.86%  
35 30aa, >Antimicrobial;Antim... at 35.00%  
36 20aa, >Antimicrobial... at 45.00%  
37 30aa, >Antibacterial... at 35.00%  
38 13aa, >antimicrobial... at 46.15%  
39 30aa, >antibacterial06489... at 43.33%  
40 17aa, >antibacterial07612... at 41.18%  
41 20aa, >antibacterial07954... at 35.00%  
42 11aa, >antibacterial08101... at 54.55%  
43 11aa, >antibacterial08301... at 45.45%  
44 15aa, >antibacterial08458... at 35.00%  
45 19aa, >antibacterial08534... at 42.11%  
46 20aa, >antibacterial08713... at 35.00%  
47 16aa, >antibacterial09013... at 43.75%  
48 16aa, >antibacterial09015... at 43.75%  
49 30aa, >antibacterial09233... at 35.00%  
50 12aa, >antibacterial10142... \*  
51 13aa, >antibacterial11124... at 46.15%  
52 13aa, >antibacterial11200... at 53.85%  
53 13aa, >antibacterial11373... \*  
54 13aa, >antibacterial11376... at 31.54%  
55 16aa, >antibacterial11429... at 43.75%  
56 13aa, >antibacterial11758... at 46.15%  
57 16aa, >antibacterial11899... at 43.75%  
58 15aa, >antibacterial12001... at 35.00%  
59 17aa, >antibacterial12121... at 41.18%

```

60    17aa, >antibacterial112129... at 41.18%
61    13aa, >antibacterial12225... at 46.15%
62    15aa, >antibacterial12591... at 35.00%
63    15aa, >antibacterial12996... at 35.00%
64    17aa, >antibacterial13043... at 47.06%
65    19aa, >antibacterial13233... at 42.11%
66    18aa, >antibacterial13359... at 50.00%
>Cluster 41
0     20aa, >Antimicrobial... at 35.00%
1     15aa, >antibacterial... at 35.00%
2     13aa, >antifungal;antimicr... *
3     28aa, >anti-Gram-;Antibact... at 42.86%
4     25aa, >Antifungal... at 35.00%
5     26aa, >antibacterial... at 42.31%
6     255aa, >Antimicrobial... *
7     40aa, >antimicrobial... at 35.00%
8     24aa, >antimicrobial... at 41.67%
9     27aa, >antibacterial08931... at 40.74%
10    20aa, >antibacterial09418... at 35.00%
11    14aa, >antibacterial10476... at 42.86%
12    26aa, >antibacterial10693... at 46.15%
13    17aa, >antibacterial11189... at 41.18%
14    13aa, >antibacterial11441... at 46.15%
15    14aa, >antibacterial11485... at 42.86%
16    17aa, >antibacterial11653... at 47.06%
17    13aa, >antibacterial12151... at 46.15%
18    12aa, >antibacterial12474... at 41.67%
>Cluster 42
0     13aa, >Antifungal;Antimicr... at 46.15%
1     11aa, >anti-Gram+;antivira... *
2     11aa, >Antibacterial;Antif... at 45.45%
3     15aa, >anti-Gram+;Antibact... at 35.00%
4     17aa, >antimicrobial... at 41.18%
5     17aa, >Antibacterial... at 41.18%
6     15aa, >Antibacterial... at 46.67%
7     13aa, >Antibacterial... at 46.15%
8     13aa, >antimicrobial... at 46.15%
9     25aa, >anti-Gram+;Antimicr... at 44.00%
10    19aa, >antibacterial;antif... at 42.11%
11    27aa, >antimicrobial... at 48.15%
12    24aa, >antimicrobial... at 41.67%
13    21aa, >antibacterial;Antif... at 42.86%
14    21aa, >antimicrobial... at 47.62%
15    21aa, >antimicrobial... at 42.86%
16    28aa, >antibacterial... at 42.86%
17    23aa, >Antimicrobial... at 47.83%
18    21aa, >anti-Gram+;anti-HIV... at 47.62%
19    30aa, >antimicrobial... at 46.67%
20    27aa, >Antibacterial;Antif... at 44.44%
21    21aa, >antimicrobial... at 42.86%
22    12aa, >Antifungal;Antimicr... at 50.00%
23    25aa, >antibacterial;antim... at 35.00%
24    30aa, >anti-Gram+;Antibact... at 35.00%
25    255aa, >Antimicrobial... *

```

26 11aa, >antibacterial;antim... at 54.55%  
27 12aa, >antimicrobial... at 38.33%  
28 14aa, >anti-Gram+;Antibact... at 42.86%  
29 27aa, >Antibacterial... at 40.74%  
30 18aa, >antibacterial06557... at 44.44%  
31 13aa, >antibacterial06594... at 46.15%  
32 29aa, >antibacterial06639... at 48.28%  
33 28aa, >antibacterial06644... at 46.43%  
34 26aa, >antibacterial06674... at 46.15%  
35 20aa, >antibacterial07651... at 35.00%  
36 13aa, >antibacterial08029... at 46.15%  
37 16aa, >antibacterial08058... at 50.00%  
38 25aa, >antibacterial08112... at 44.00%  
39 20aa, >antibacterial08389... at 35.00%  
40 17aa, >antibacterial08390... at 47.06%  
41 23aa, >antibacterial08419... at 43.48%  
42 17aa, >antibacterial08456... at 47.06%  
43 20aa, >antibacterial08476... at 35.00%  
44 23aa, >antibacterial08558... at 52.17%  
45 12aa, >antibacterial08564... at 50.00%  
46 19aa, >antibacterial08661... at 42.11%  
47 21aa, >antibacterial09237... at 42.86%  
48 23aa, >antibacterial09475... \*  
49 28aa, >antibacterial09478... at 42.86%  
50 25aa, >antibacterial09535... at 44.00%  
51 16aa, >antibacterial09545... at 50.00%  
52 18aa, >antibacterial09722... at 50.00%  
53 13aa, >antibacterial09740... at 53.85%  
54 30aa, >antibacterial10043... at 35.00%  
55 11aa, >antibacterial10271... \*  
56 17aa, >antibacterial10411... at 41.18%  
57 21aa, >antibacterial10455... at 42.86%  
58 16aa, >antibacterial10497... at 43.75%  
59 19aa, >antibacterial10636... at 42.11%  
60 13aa, >antibacterial10715... at 46.15%  
61 23aa, >antibacterial11136... at 43.48%  
62 14aa, >antibacterial11230... at 42.86%  
63 13aa, >antibacterial11468... at 46.15%  
64 18aa, >antibacterial11592... at 50.00%  
65 18aa, >antibacterial11616... at 44.44%  
66 13aa, >antibacterial11776... at 53.85%  
67 18aa, >antibacterial11820... at 50.00%  
68 27aa, >antibacterial11835... at 40.74%  
69 15aa, >antibacterial11971... at 35.00%  
70 13aa, >antibacterial12041... at 46.15%  
71 20aa, >antibacterial12095... at 45.00%  
72 17aa, >antibacterial12115... at 47.06%  
73 13aa, >antibacterial12220... at 53.85%  
74 13aa, >antibacterial12254... at 46.15%  
75 13aa, >antibacterial12259... at 46.15%  
76 13aa, >antibacterial12269... at 46.15%  
77 13aa, >antibacterial12271... at 46.15%  
78 13aa, >antibacterial12272... at 46.15%  
79 13aa, >antibacterial12273... at 46.15%

80 13aa, >antibacterial12274... at 46.15%  
81 14aa, >antibacterial12282... at 42.86%  
82 13aa, >antibacterial12288... at 46.15%  
83 13aa, >antibacterial12327... at 46.15%  
84 18aa, >antibacterial12353... at 44.44%  
85 20aa, >antibacterial12488... at 35.00%  
86 14aa, >antibacterial12515... at 42.86%  
87 20aa, >antibacterial12654... at 35.00%  
88 12aa, >antibacterial13121... \*  
89 20aa, >antibacterial13156... at 35.00%  
90 19aa, >antibacterial13224... at 42.11%  
91 12aa, >antibacterial13407... at 41.67%

>Cluster 43

0 28aa, >Antifungal;Gram-... at 42.86%  
1 21aa, >antimicrobial... at 42.86%  
2 25aa, >anti-Gram+;antifung... at 35.00%  
3 22aa, >antimicrobial... at 45.45%  
4 24aa, >antibacterial... at 45.83%  
5 23aa, >antimicrobial... at 43.48%  
6 13aa, >antimicrobial;antiv... \*  
7 13aa, >antibacterial;antim... at 46.15%  
8 19aa, >Antibacterial;antim... at 42.11%  
9 11aa, >anti-Gram+;antibact... at 45.45%  
10 255aa, >Antimicrobial... \*  
11 16aa, >Antifungal... at 43.75%  
12 12aa, >antibacterial06994... at 41.67%  
13 12aa, >antibacterial06999... at 41.67%  
14 11aa, >antibacterial07711... at 45.45%  
15 20aa, >antibacterial08477... at 35.00%  
16 20aa, >antibacterial08543... at 45.00%  
17 13aa, >antibacterial08905... at 46.15%  
18 20aa, >antibacterial09932... at 35.00%  
19 13aa, >antibacterial10116... at 46.15%  
20 27aa, >antibacterial10251... at 40.74%  
21 30aa, >antibacterial10607... at 43.33%  
22 22aa, >antibacterial10895... \*  
23 18aa, >antibacterial11343... at 44.44%  
24 30aa, >antibacterial11354... at 43.33%  
25 36aa, >antibacterial11487... at 41.67%  
26 14aa, >antibacterial12088... at 42.86%  
27 20aa, >antibacterial12630... at 35.00%  
28 12aa, >antibacterial12657... at 41.67%  
29 15aa, >antibacterial12835... at 46.67%  
30 20aa, >antibacterial13053... at 45.00%  
31 18aa, >antibacterial13054... at 44.44%  
32 20aa, >antibacterial13235... at 35.00%

>Cluster 44

0 26aa, >antimicrobial... at 42.31%  
1 17aa, >antimicrobial... at 41.18%  
2 17aa, >antibacterial... at 41.18%  
3 13aa, >anti-Gram+;Antibact... at 46.15%  
4 20aa, >antibacterial... at 35.00%  
5 34aa, >Antibacterial... at 41.18%  
6 24aa, >anti-Gram+;Antibact... at 41.67%

7 12aa, >Antifungal;Antimicr... at 41.67%  
8 253aa, >Antimicrobial... at 47.83%  
9 255aa, >Antimicrobial... \*  
10 255aa, >Antimicrobial... at 46.67%  
11 255aa, >Antimicrobial... at 55.29%  
12 255aa, >Antimicrobial... at 53.92%  
13 256aa, >Antimicrobial... at 55.69%  
14 256aa, >Antimicrobial... at 55.69%  
15 256aa, >Antimicrobial... at 54.51%  
16 257aa, >Antimicrobial... at 50.59%  
17 257aa, >Antimicrobial... at 57.65%  
18 258aa, >Antimicrobial... at 52.94%  
19 258aa, >Antibacterial;Antim... at 53.33%  
20 258aa, >Antimicrobial... at 52.55%  
21 18aa, >Antimicrobial... at 50.00%  
22 13aa, >antibacterial06512... at 46.15%  
23 24aa, >antibacterial06521... at 41.67%  
24 18aa, >antibacterial06659... \*  
25 12aa, >antibacterial07024... at 41.67%  
26 20aa, >antibacterial07355... at 35.00%  
27 14aa, >antibacterial07458... at 42.86%  
28 17aa, >antibacterial07909... at 41.18%  
29 25aa, >antibacterial08068... at 35.00%  
30 11aa, >antibacterial08798... at 45.45%  
31 12aa, >antibacterial09022... at 50.00%  
32 13aa, >antibacterial09232... at 46.15%  
33 13aa, >antibacterial09280... at 46.15%  
34 13aa, >antibacterial09281... at 46.15%  
35 20aa, >antibacterial09367... at 35.00%  
36 20aa, >antibacterial09444... at 45.00%  
37 20aa, >antibacterial09933... at 35.00%  
38 15aa, >antibacterial10156... at 35.00%  
39 22aa, >antibacterial10175... at 40.91%  
40 12aa, >antibacterial10239... at 41.67%  
41 30aa, >antibacterial10617... at 43.33%  
42 13aa, >antibacterial10694... at 46.15%  
43 14aa, >antibacterial10840... at 42.86%  
44 16aa, >antibacterial10908... at 50.00%  
45 23aa, >antibacterial11325... at 43.48%  
46 15aa, >antibacterial11392... at 46.67%  
47 17aa, >antibacterial11393... at 41.18%  
48 17aa, >antibacterial11424... at 41.18%  
49 15aa, >antibacterial11629... at 35.00%  
50 13aa, >antibacterial11697... at 46.15%  
51 20aa, >antibacterial11878... \*  
52 12aa, >antibacterial11925... at 41.67%  
53 15aa, >antibacterial11930... at 35.00%  
54 12aa, >antibacterial11984... at 50.00%  
55 20aa, >antibacterial12032... at 35.00%  
56 13aa, >antibacterial12047... at 46.15%  
57 13aa, >antibacterial12061... at 46.15%  
58 12aa, >antibacterial12463... at 41.67%  
59 15aa, >antibacterial12633... \*  
60 15aa, >antibacterial12638... at 53.33%

```

61    13aa, >antibacterial112860... at 46.15%
62    32aa, >antibacterial113044... at 46.88%
63    30aa, >antibacterial113230... at 43.33%
>Cluster 45
0     36aa, >antibacterial;antim... at 41.67%
1     20aa, >Antifungal... at 35.00%
2     16aa, >antibacterial;antim... at 43.75%
3     18aa, >antibacterial;antif... at 44.44%
4     21aa, >antimicrobial... at 42.86%
5     27aa, >antibacterial... at 40.74%
6     37aa, >anti-Gram+;antibact... at 40.54%
7     25aa, >antibacterial;antim... at 44.00%
8     255aa, >Antimicrobial... *
9     255aa, >Antimicrobial... at 48.63%
10    18aa, >Antimicrobial... at 44.44%
11    16aa, >Antimicrobial... at 43.75%
12    21aa, >anti-Gram+;antibact... at 47.62%
13    15aa, >antimicrobial... at 35.00%
14    26aa, >antibacterial06550... at 46.15%
15    21aa, >antibacterial07578... at 42.86%
16    34aa, >antibacterial07791... at 41.18%
17    29aa, >antibacterial07845... at 48.28%
18    15aa, >antibacterial07975... at 46.67%
19    13aa, >antibacterial09866... at 53.85%
20    20aa, >antibacterial10923... at 35.00%
21    11aa, >antibacterial111210... at 45.45%
22    22aa, >antibacterial111407... at 40.91%
23    16aa, >antibacterial111408... *
24    19aa, >antibacterial111454... at 42.11%
25    18aa, >antibacterial111754... at 55.56%
26    20aa, >antibacterial111896... at 35.00%
27    20aa, >antibacterial112030... at 35.00%
28    12aa, >antibacterial112946... *
29    18aa, >antibacterial113302... at 44.44%
30    12aa, >antibacterial113332... at 41.67%
31    20aa, >antibacterial113364... at 35.00%
>Cluster 46
0     16aa, >antimicrobial... at 43.75%
1     22aa, >anti-Gram+;antibact... at 40.91%
2     16aa, >Antimicrobial... at 43.75%
3     21aa, >antibacterial;antim... at 42.86%
4     21aa, >antimicrobial... *
5     21aa, >antimicrobial... at 47.62%
6     13aa, >antimicrobial... at 36.15%
7     255aa, >Antibacterial... *
8     44aa, >Antimicrobial... at 40.91%
9     17aa, >antibacterial06568... *
10    19aa, >antibacterial07350... at 42.11%
11    18aa, >antibacterial07396... at 50.00%
12    12aa, >antibacterial07917... at 50.00%
13    11aa, >antibacterial08229... at 45.45%
14    18aa, >antibacterial08442... at 44.44%
15    12aa, >antibacterial08964... at 41.67%
16    20aa, >antibacterial09436... at 35.00%

```



```

17 15aa, >antibacterial09837... at 46.67%
18 12aa, >antibacterial10534... at 41.67%
19 15aa, >antibacterial11570... at 35.00%
20 15aa, >antibacterial11644... at 35.00%
21 11aa, >antibacterial11687... at 45.45%
22 21aa, >antibacterial11739... at 42.86%
23 12aa, >antibacterial11927... at 41.67%
24 14aa, >antibacterial12035... at 42.86%
25 14aa, >antibacterial12090... at 42.86%
26 14aa, >antibacterial12091... at 42.86%
27 12aa, >antibacterial12978... *
28 21aa, >antibacterial13186... at 42.86%
29 15aa, >antibacterial13296... at 35.00%
30 12aa, >antibacterial13360... at 41.67%
>Cluster 47
0 21aa, >Antimicrobial... at 42.86%
1 13aa, >antimicrobial... at 46.15%
2 255aa, >Antimicrobial... *
3 14aa, >antimicrobial... at 42.86%
4 12aa, >anti-Gram+;antibact... at 41.67%
5 11aa, >antibacterial07855... at 45.45%
6 11aa, >antibacterial07862... at 45.45%
7 11aa, >antibacterial07863... at 45.45%
8 13aa, >antibacterial08186... at 46.15%
9 17aa, >antibacterial08675... at 41.18%
10 12aa, >antibacterial08934... *
11 12aa, >antibacterial09792... at 41.67%
12 17aa, >antibacterial11761... at 41.18%
13 15aa, >antibacterial11839... at 35.00%
14 29aa, >antibacterial11886... at 41.38%
15 11aa, >antibacterial12855... at 45.45%
16 12aa, >antibacterial13068... at 50.00%
>Cluster 48
0 25aa, >antimicrobial... at 44.00%
1 21aa, >anti-Gram+;antibact... *
2 23aa, >antibacterial;antim... at 43.48%
3 13aa, >anti-Gram+;Antibact... at 46.15%
4 23aa, >antimicrobial... at 43.48%
5 13aa, >antibacterial;antim... at 53.85%
6 24aa, >antimicrobial... at 45.83%
7 19aa, >Antibacterial;Antif... at 47.37%
8 254aa, >Antibacterial;Antiv... *
9 21aa, >antimicrobial... at 42.86%
10 34aa, >anti-Gram+;antibact... at 41.18%
11 33aa, >antimicrobial... at 42.42%
12 33aa, >Antimicrobial... at 48.48%
13 22aa, >Antimicrobial... at 45.45%
14 29aa, >antimicrobial... at 41.38%
15 29aa, >antimicrobial... at 41.38%
16 25aa, >anti-Gram+;antibact... at 35.00%
17 25aa, >Anti-Gram-;antibact... at 35.00%
18 25aa, >antimicrobial... at 44.00%
19 21aa, >Antibacterial... at 47.62%
20 14aa, >Antifungal;Gram-... at 57.14%

```

```

21 26aa, >antibacterial... at 46.15%
22 255aa, >Antibacterial... *
23 15aa, >antibacterial07526... at 35.00%
24 14aa, >antibacterial07579... at 50.00%
25 11aa, >antibacterial07869... at 45.45%
26 11aa, >antibacterial07870... at 45.45%
27 25aa, >antibacterial07884... at 44.00%
28 12aa, >antibacterial07902... at 41.67%
29 13aa, >antibacterial08187... at 53.85%
30 11aa, >antibacterial08362... at 45.45%
31 32aa, >antibacterial08570... at 40.62%
32 24aa, >antibacterial08782... *
33 17aa, >antibacterial08838... at 47.06%
34 17aa, >antibacterial09549... at 41.18%
35 15aa, >antibacterial09835... at 46.67%
36 15aa, >antibacterial09838... at 35.00%
37 11aa, >antibacterial09891... *
38 11aa, >antibacterial10593... at 54.55%
39 16aa, >antibacterial10856... at 43.75%
40 12aa, >antibacterial11720... at 41.67%
41 20aa, >antibacterial12069... at 35.00%
42 15aa, >antibacterial12174... at 35.00%
43 18aa, >antibacterial12628... at 50.00%
44 18aa, >antibacterial12692... at 50.00%
45 20aa, >antibacterial13194... at 35.00%
46 20aa, >antibacterial13260... at 35.00%
>Cluster 49
0 37aa, >Antimicrobial... *
1 45aa, >anti-Gram+;Antimicr... at 64.44%
2 71aa, >Antimicrobial... at 46.48%
3 44aa, >Antimicrobial... at 59.09%
4 22aa, >anti-Gram+;Antimicr... at 77.27%
5 27aa, >Antimicrobial... *
6 25aa, >Antifungal... at 44.00%
7 56aa, >Antimicrobial... at 41.07%
8 53aa, >Antimicrobial... at 54.72%
9 70aa, >Antimicrobial... at 35.00%
10 68aa, >Antimicrobial... at 44.12%
11 70aa, >Antimicrobial... at 51.43%
12 80aa, >Antimicrobial... at 50.00%
13 71aa, >Antimicrobial... at 42.25%
14 62aa, >Antimicrobial... at 51.61%
15 72aa, >Antimicrobial... at 50.00%
16 76aa, >Antimicrobial... at 46.05%
17 72aa, >Antimicrobial... at 58.33%
18 71aa, >Antimicrobial... at 49.30%
19 71aa, >Antimicrobial... at 49.30%
20 71aa, >Antimicrobial... at 42.25%
21 71aa, >Antimicrobial... at 45.07%
22 70aa, >Antimicrobial... at 50.00%
23 84aa, >Antimicrobial... at 40.48%
24 84aa, >Antimicrobial... at 40.48%
25 72aa, >Antimicrobial... at 48.61%
26 70aa, >Antimicrobial... at 42.86%

```

27 80aa, >Antimicrobial... at 50.00%  
28 72aa, >Antimicrobial... at 40.28%  
29 78aa, >Antimicrobial... at 44.87%  
30 64aa, >Antimicrobial... at 48.44%  
31 75aa, >Antimicrobial... at 48.00%  
32 71aa, >Antimicrobial... at 56.34%  
33 67aa, >Antimicrobial... at 47.76%  
34 66aa, >Antimicrobial... at 48.48%  
35 68aa, >Antimicrobial... at 44.12%  
36 72aa, >Antibacterial;Antif... at 56.94%  
37 70aa, >Antimicrobial... \*  
38 67aa, >Antimicrobial... at 49.25%  
39 65aa, >Antimicrobial... at 55.38%  
40 62aa, >Antimicrobial... at 53.23%  
41 62aa, >Antimicrobial... at 54.84%  
42 62aa, >Antimicrobial... at 58.06%  
43 64aa, >Antimicrobial... at 56.25%  
44 63aa, >Antimicrobial... at 53.97%  
45 67aa, >Antimicrobial... at 49.25%  
46 255aa, >Antimicrobial... \*  
47 63aa, >Antimicrobial... at 50.79%  
48 79aa, >Antimicrobial... at 48.10%  
49 64aa, >Antimicrobial... at 56.25%  
50 64aa, >Antimicrobial... at 53.12%  
51 255aa, >Antimicrobial... at 85.49%  
52 86aa, >Antimicrobial... at 45.35%  
53 70aa, >Antimicrobial... at 52.86%  
54 62aa, >Antimicrobial... at 53.23%  
55 59aa, >Antimicrobial... at 57.63%  
56 145aa, >Antimicrobial... at 67.59%  
57 189aa, >Antimicrobial... at 70.37%  
58 233aa, >Antimicrobial... at 72.53%  
59 255aa, >Antimicrobial... at 76.47%  
60 199aa, >Antimicrobial... \*  
61 76aa, >Antimicrobial... at 51.32%  
62 71aa, >Antimicrobial... at 61.97%  
63 62aa, >Antimicrobial... at 56.45%  
64 62aa, >Antimicrobial... at 61.29%  
65 71aa, >Antimicrobial... at 50.70%  
66 80aa, >Antimicrobial... at 56.25%  
67 68aa, >Antimicrobial... at 55.88%  
68 70aa, >Antimicrobial... at 52.86%  
69 66aa, >Antimicrobial... at 53.03%  
70 76aa, >Antimicrobial... at 50.00%  
71 85aa, >Antimicrobial... at 35.00%  
72 70aa, >Antibacterial... at 47.14%  
73 70aa, >Antimicrobial... at 48.57%  
74 68aa, >Antimicrobial... at 47.06%  
75 70aa, >Antimicrobial... at 45.71%  
76 73aa, >Antimicrobial... at 52.05%  
77 78aa, >Antimicrobial... at 46.15%  
78 75aa, >Antimicrobial... at 35.00%  
79 72aa, >Antimicrobial... at 45.83%  
80 70aa, >Antimicrobial... at 51.43%

81 67aa, >Antimicrobial... at 55.22%  
82 71aa, >Antibacterial... at 42.25%  
83 66aa, >Antimicrobial... at 51.52%  
84 70aa, >Antimicrobial... at 41.43%  
85 76aa, >Antimicrobial... at 44.74%  
86 70aa, >Antimicrobial... at 42.86%  
87 70aa, >Antimicrobial... at 45.71%  
88 72aa, >Antimicrobial... at 48.61%  
89 65aa, >Antimicrobial... at 44.62%  
90 61aa, >Antimicrobial... at 75.41%  
91 66aa, >Antimicrobial... at 50.00%  
92 72aa, >Antimicrobial... at 52.78%  
93 72aa, >Antimicrobial... at 50.00%  
94 72aa, >Antimicrobial... at 40.28%  
95 64aa, >Antimicrobial... at 51.56%  
96 199aa, >Antimicrobial... \*  
97 76aa, >Antimicrobial... at 47.37%  
98 76aa, >Antimicrobial... at 48.68%  
99 72aa, >Antimicrobial... at 50.00%  
100 66aa, >Antimicrobial... at 59.09%  
101 80aa, >Antimicrobial... at 46.25%  
102 78aa, >Antimicrobial... at 44.87%  
103 67aa, >Antimicrobial... at 53.73%  
104 71aa, >Antimicrobial... at 47.89%  
105 70aa, >Antimicrobial... at 52.86%  
106 70aa, >Antimicrobial... at 35.00%  
107 70aa, >Antimicrobial... at 55.71%  
108 72aa, >Antimicrobial... at 40.28%  
109 191aa, >Antimicrobial... at 69.63%  
110 209aa, >Antimicrobial... at 51.67%  
111 72aa, >Antibacterial... at 41.67%  
112 67aa, >Antimicrobial... at 41.79%  
113 27aa, >Antimicrobial... \*  
114 42aa, >Antimicrobial... at 59.52%  
115 40aa, >Antimicrobial... at 72.50%  
116 25aa, >Antimicrobial... at 46.00%  
117 40aa, >Antimicrobial... at 70.00%  
118 14aa, >anti-Gram+;antibact... at 42.86%  
119 28aa, >Antimicrobial... at 60.71%  
120 41aa, >Antimicrobial... at 73.17%  
121 21aa, >Antimicrobial... at 85.71%  
122 40aa, >Antimicrobial... at 77.50%  
123 36aa, >Antimicrobial... \*  
124 36aa, >Antimicrobial... at 45.00%  
125 33aa, >Antimicrobial... at 75.76%  
126 21aa, >Antimicrobial... \*  
127 36aa, >Antimicrobial... at 63.89%  
128 44aa, >Antimicrobial... at 63.64%  
129 44aa, >Antimicrobial... at 63.64%  
130 20aa, >Anti-Gram-;Antibact... at 35.00%  
131 15aa, >Antiviral... at 46.67%  
132 20aa, >antibacterial06587... at 35.00%  
133 61aa, >antibacterial06786... at 52.46%  
134 66aa, >antibacterial06787... at 53.03%

135 74aa, >antibacterial06790... at 43.24%  
136 74aa, >antibacterial07103... at 43.24%  
137 74aa, >antibacterial07104... at 41.89%  
138 20aa, >antibacterial07676... at 35.00%  
139 13aa, >antibacterial07817... at 46.15%  
140 13aa, >antibacterial07818... at 53.85%  
141 13aa, >antibacterial07819... at 46.15%  
142 24aa, >antibacterial08144... at 41.67%  
143 15aa, >antibacterial08437... at 46.67%  
144 15aa, >antibacterial08438... at 35.00%  
145 11aa, >antibacterial08517... at 45.45%  
146 11aa, >antibacterial08518... at 54.55%  
147 19aa, >antibacterial08867... at 42.11%  
148 19aa, >antibacterial08871... at 42.11%  
149 16aa, >antibacterial08947... at 43.75%  
150 16aa, >antibacterial08948... at 43.75%  
151 16aa, >antibacterial08949... at 43.75%  
152 15aa, >antibacterial09333... at 35.00%  
153 13aa, >antibacterial09603... at 46.15%  
154 12aa, >antibacterial10165... at 41.67%  
155 14aa, >antibacterial10400... at 42.86%  
156 13aa, >antibacterial10449... at 46.15%  
157 62aa, >antibacterial10810... at 45.16%  
158 65aa, >antibacterial10987... at 47.69%  
159 62aa, >antibacterial10988... at 58.06%  
160 61aa, >antibacterial10989... \*  
161 65aa, >antibacterial10990... at 50.77%  
162 61aa, >antibacterial10991... at 52.46%  
163 66aa, >antibacterial10992... at 48.48%  
164 69aa, >antibacterial10993... at 47.83%  
165 71aa, >antibacterial10994... at 47.89%  
166 72aa, >antibacterial10995... at 50.00%  
167 67aa, >antibacterial10997... at 53.73%  
168 12aa, >antibacterial11165... at 41.67%  
169 25aa, >antibacterial11272... at 76.00%  
170 14aa, >antibacterial11510... at 64.29%  
171 13aa, >antibacterial12196... at 46.15%  
172 13aa, >antibacterial12197... at 46.15%  
173 13aa, >antibacterial12198... at 46.15%  
174 13aa, >antibacterial12211... at 46.15%  
175 13aa, >antibacterial12212... at 46.15%  
176 13aa, >antibacterial12213... at 46.15%  
177 13aa, >antibacterial12215... at 53.85%  
178 13aa, >antibacterial12217... at 46.15%  
179 13aa, >antibacterial12228... at 46.15%  
180 13aa, >antibacterial12229... at 46.15%  
181 13aa, >antibacterial12231... at 46.15%  
182 13aa, >antibacterial12250... at 46.15%  
183 13aa, >antibacterial12251... at 46.15%  
184 13aa, >antibacterial12253... at 61.54%  
185 12aa, >antibacterial12335... at 41.67%  
186 16aa, >antibacterial12890... at 43.75%  
187 19aa, >antibacterial12907... at 42.11%  
188 11aa, >antibacterial12937... \*

```

189 11aa, >antibacterial12945... at 54.55%
190 12aa, >antibacterial13328... at 41.67%
>Cluster 50
0 21aa, >antibacterial... at 42.86%
1 255aa, >Antimicrobial... *
2 87aa, >Antimicrobial... at 44.83%
3 14aa, >antibacterial08738... *
4 20aa, >antibacterial09157... at 55.00%
5 11aa, >antibacterial09850... at 45.45%
6 19aa, >antibacterial11458... at 42.11%
7 14aa, >antibacterial11622... at 42.86%
8 14aa, >antibacterial12296... at 50.00%
9 13aa, >antibacterial12316... *
10 13aa, >antibacterial12317... at 46.15%
11 13aa, >antibacterial12318... at 46.15%
12 13aa, >antibacterial12321... at 46.15%
13 13aa, >antibacterial12323... at 46.15%
14 13aa, >antibacterial12328... at 46.15%
15 13aa, >antibacterial12333... at 46.15%
16 15aa, >antibacterial13267... at 46.67%
>Cluster 51
0 18aa, >anti-Gram+;antibact... at 44.44%
1 22aa, >Antifungal;antimicr... *
2 11aa, >antimicrobial... at 45.45%
3 15aa, >antimicrobial... at 35.00%
4 13aa, >antimicrobial... at 46.15%
5 40aa, >antimicrobial... at 42.50%
6 31aa, >antimicrobial... at 45.16%
7 14aa, >antimicrobial... at 42.86%
8 18aa, >antimicrobial... at 44.44%
9 13aa, >Antimicrobial... at 46.15%
10 27aa, >antimicrobial;antiv... at 40.74%
11 255aa, >Antimicrobial... *
12 21aa, >Antimicrobial... at 42.86%
13 20aa, >anti-Gram+;antibact... at 45.00%
14 20aa, >antibacterial... at 45.00%
15 23aa, >Antimicrobial... at 47.83%
16 15aa, >Antifungal;Antimicr... at 35.00%
17 32aa, >anti-Gram+;antibact... at 40.62%
18 28aa, >antibacterial... at 42.86%
19 13aa, >antibacterial06963... at 46.15%
20 11aa, >antibacterial07384... at 45.45%
21 18aa, >antibacterial07402... at 50.00%
22 18aa, >antibacterial07412... at 44.44%
23 30aa, >antibacterial07498... at 35.00%
24 17aa, >antibacterial07553... at 31.18%
25 24aa, >antibacterial07653... at 41.67%
26 13aa, >antibacterial07668... at 46.15%
27 13aa, >antibacterial07669... at 46.15%
28 13aa, >antibacterial07670... at 46.15%
29 13aa, >antibacterial07672... at 46.15%
30 20aa, >antibacterial07753... at 45.00%
31 14aa, >antibacterial07769... at 42.86%
32 14aa, >antibacterial07770... at 42.86%

```

33 14aa, >antibacterial07840... at 42.86%  
34 14aa, >antibacterial07841... at 42.86%  
35 15aa, >antibacterial07914... at 46.67%  
36 12aa, >antibacterial07965... at 41.67%  
37 17aa, >antibacterial08022... at 41.18%  
38 11aa, >antibacterial08109... at 45.45%  
39 17aa, >antibacterial08235... \*  
40 17aa, >antibacterial08270... at 41.18%  
41 16aa, >antibacterial08307... at 43.75%  
42 13aa, >antibacterial08380... at 53.85%  
43 13aa, >antibacterial08384... at 46.15%  
44 11aa, >antibacterial08522... at 45.45%  
45 11aa, >antibacterial08631... at 45.45%  
46 12aa, >antibacterial08837... at 41.67%  
47 15aa, >antibacterial08859... at 35.00%  
48 13aa, >antibacterial08897... at 46.15%  
49 12aa, >antibacterial08945... at 41.67%  
50 26aa, >antibacterial09206... at 46.15%  
51 23aa, >antibacterial09225... at 43.48%  
52 15aa, >antibacterial09269... at 46.67%  
53 20aa, >antibacterial09419... at 45.00%  
54 20aa, >antibacterial09431... at 35.00%  
55 14aa, >antibacterial09457... at 42.86%  
56 20aa, >antibacterial09458... \*  
57 13aa, >antibacterial09586... at 46.15%  
58 15aa, >antibacterial09678... at 35.00%  
59 18aa, >antibacterial09706... at 44.44%  
60 21aa, >antibacterial09749... at 47.62%  
61 12aa, >antibacterial09958... at 41.67%  
62 20aa, >antibacterial10038... at 45.00%  
63 13aa, >antibacterial10117... \*  
64 14aa, >antibacterial10206... at 50.00%  
65 14aa, >antibacterial10332... at 42.86%  
66 14aa, >antibacterial10334... at 50.00%  
67 15aa, >antibacterial10357... \*  
68 15aa, >antibacterial10358... at 53.33%  
69 24aa, >antibacterial10377... at 41.67%  
70 23aa, >antibacterial10483... at 43.48%  
71 16aa, >antibacterial10493... at 50.00%  
72 13aa, >antibacterial10630... at 46.15%  
73 18aa, >antibacterial10710... at 44.44%  
74 20aa, >antibacterial10721... at 35.00%  
75 14aa, >antibacterial10767... at 42.86%  
76 14aa, >antibacterial10776... at 42.86%  
77 20aa, >antibacterial11736... at 45.00%  
78 13aa, >antibacterial11747... at 46.15%  
79 12aa, >antibacterial12112... at 41.67%  
80 13aa, >antibacterial12310... at 53.85%  
81 17aa, >antibacterial12382... at 41.18%  
82 12aa, >antibacterial12467... \*  
83 12aa, >antibacterial12468... at 41.67%  
84 13aa, >antibacterial12469... at 41.67%  
85 12aa, >antibacterial12470... at 41.67%  
86 13aa, >antibacterial12471... at 41.67%

```

87    20aa, >antibacterial12536... at 45.00%
88    12aa, >antibacterial12588... at 41.67%
89    22aa, >antibacterial12710... at 40.91%
90    15aa, >antibacterial12950... at 46.67%
91    18aa, >antibacterial13092... at 44.44%
92    12aa, >antibacterial13168... at 50.00%
93    15aa, >antibacterial13266... at 35.00%
94    14aa, >antibacterial13319... at 42.86%
>Cluster 52
0     37aa, >antimicrobial... at 40.54%
1     27aa, >Antimicrobial... at 44.44%
2     19aa, >anti-Gram+;Antibact... at 42.11%
3     25aa, >antibacterial;Antif... at 44.00%
4     20aa, >Antibacterial... at 35.00%
5     22aa, >Antibacterial;antim... *
6     17aa, >anti-Gram+;Antimicr... at 41.18%
7     13aa, >antimicrobial... at 46.15%
8     13aa, >antimicrobial... *
9     24aa, >antibacterial;antim... at 41.67%
10    255aa, >Antimicrobial... *
11    16aa, >Antifungal;Antimicr... at 43.75%
12    15aa, >Antifungal;Antimicr... at 53.33%
13    15aa, >Antifungal;Antimicr... *
14    15aa, >Antifungal;Antimicr... at 53.33%
15    14aa, >Antibacterial... at 50.00%
16    11aa, >Antibacterial... at 45.45%
17    11aa, >antibacterial08212... at 45.45%
18    11aa, >antibacterial09369... at 54.55%
19    11aa, >antibacterial09371... at 45.45%
20    20aa, >antibacterial09410... at 45.00%
21    16aa, >antibacterial09499... at 50.00%
22    34aa, >antibacterial09868... at 41.18%
23    20aa, >antibacterial10037... at 35.00%
24    20aa, >antibacterial10040... at 35.00%
25    12aa, >antibacterial10655... at 41.67%
26    26aa, >antibacterial11155... at 42.31%
27    15aa, >antibacterial11294... at 35.00%
28    16aa, >antibacterial112739... at 50.00%
29    20aa, >antibacterial113303... at 45.00%
30    17aa, >antibacterial113392... at 41.18%
>Cluster 53
0     20aa, >Antibacterial;antim... at 35.00%
1     22aa, >anti-Gram+;antibact... at 45.45%
2     18aa, >Antibacterial;Antif... at 44.44%
3     24aa, >antimicrobial... *
4     22aa, >antibacterial;Antif... at 40.91%
5     23aa, >anti-Gram+;antibact... at 43.48%
6     25aa, >anti-Gram-;antibact... at 35.00%
7     26aa, >antimicrobial... at 42.31%
8     19aa, >antimicrobial... at 42.11%
9     26aa, >Antimicrobial... at 42.31%
10    26aa, >Antibacterial... at 42.31%
11    255aa, >Antibacterial... *
12    255aa, >Antibacterial... at 51.37%

```



```

13 255aa, >Antibacterial... at 46.67%
14 22aa, >Antimicrobial... at 45.45%
15 22aa, >Antimicrobial... at 40.91%
16 255aa, >Antibacterial... at 52.94%
17 18aa, >antibacterial07349... at 44.44%
18 18aa, >antibacterial07407... at 44.44%
19 15aa, >antibacterial08319... at 35.00%
20 16aa, >antibacterial08327... at 43.75%
21 17aa, >antibacterial08335... at 41.18%
22 22aa, >antibacterial08918... at 45.45%
23 21aa, >antibacterial09071... at 42.86%
24 20aa, >antibacterial09378... at 35.00%
25 14aa, >antibacterial09633... at 50.00%
26 13aa, >antibacterial09841... at 46.15%
27 20aa, >antibacterial10187... at 35.00%
28 21aa, >antibacterial10291... at 42.86%
29 19aa, >antibacterial10390... at 42.11%
30 13aa, >antibacterial10394... at 46.15%
31 13aa, >antibacterial10629... *
32 19aa, >antibacterial11587... at 42.11%
33 18aa, >antibacterial11649... *
34 27aa, >antibacterial11799... at 40.74%
35 24aa, >antibacterial12132... at 41.67%
36 13aa, >antibacterial12150... at 46.15%
37 16aa, >antibacterial12505... at 50.00%
38 20aa, >antibacterial12593... at 45.00%
39 15aa, >antibacterial12917... *
40 17aa, >antibacterial13069... at 41.18%
41 14aa, >antibacterial13244... at 42.86%
>Cluster 54
0 21aa, >anti-Gram+;antibact... at 42.86%
1 18aa, >antifungal;antimicr... at 44.44%
2 255aa, >Antibacterial... *
3 12aa, >antibacterial07017... at 41.67%
4 12aa, >antibacterial07023... at 41.67%
5 20aa, >antibacterial07950... at 45.00%
6 14aa, >antibacterial08549... at 42.86%
7 19aa, >antibacterial08608... at 42.11%
8 32aa, >antibacterial08878... at 40.62%
9 12aa, >antibacterial08954... at 41.67%
10 19aa, >antibacterial09750... *
11 15aa, >antibacterial11363... at 46.67%
12 21aa, >antibacterial11630... at 42.86%
13 22aa, >antibacterial11922... at 40.91%
14 19aa, >antibacterial13129... at 42.11%
>Cluster 55
0 255aa, >Antimicrobial... *
1 30aa, >antibacterial;antim... at 35.00%
2 12aa, >antibacterial06445... *
3 20aa, >antibacterial07919... at 35.00%
4 18aa, >antibacterial07969... at 50.00%
5 24aa, >antibacterial08282... at 41.67%
6 14aa, >antibacterial10335... at 50.00%
7 18aa, >antibacterial10703... at 50.00%

```

```

8      18aa, >antibacterial11161... at 44.44%
9      18aa, >antibacterial11941... *
10     15aa, >antibacterial12903... at 35.00%
>Cluster 56
0      21aa, >antimicrobial... at 42.86%
1      11aa, >antibacterial;antim... *
2      22aa, >antimicrobial... at 40.91%
3      22aa, >Antimicrobial... at 40.91%
4      17aa, >anti-Gram+;antibact... at 41.18%
5      255aa, >Antimicrobial... *
6      19aa, >antimicrobial... at 42.11%
7      21aa, >antimicrobial... at 47.62%
8      26aa, >Antibacterial... at 42.31%
9      22aa, >antibacterial;antim... at 45.45%
10     17aa, >antimicrobial... at 41.18%
11     17aa, >antimicrobial... at 41.18%
12     17aa, >antimicrobial... *
13     19aa, >antimicrobial... at 52.63%
14     24aa, >Antimicrobial... at 41.67%
15     11aa, >antibacterial06608... at 35.45%
16     11aa, >antibacterial07003... at 35.45%
17     18aa, >antibacterial07722... at 44.44%
18     13aa, >antibacterial08149... at 53.85%
19     25aa, >antibacterial09102... at 44.00%
20     25aa, >antibacterial09686... at 35.00%
21     17aa, >antibacterial10176... at 41.18%
22     17aa, >antibacterial10472... at 41.18%
23     11aa, >antibacterial10501... at 54.55%
24     15aa, >antibacterial11560... at 35.00%
25     24aa, >antibacterial11691... at 41.67%
26     20aa, >antibacterial11897... at 35.00%
27     13aa, >antibacterial12043... at 46.15%
28     17aa, >antibacterial12188... at 41.18%
29     17aa, >antibacterial12347... at 47.06%
30     11aa, >antibacterial12401... *
31     12aa, >antibacterial12476... at 50.00%
32     16aa, >antibacterial12500... *
33     18aa, >antibacterial12578... at 44.44%
34     30aa, >antibacterial12619... at 35.00%
35     20aa, >antibacterial12674... at 35.00%
36     14aa, >antibacterial12823... at 42.86%
37     14aa, >antibacterial12923... at 42.86%
38     19aa, >antibacterial13126... at 47.37%
>Cluster 57
0      14aa, >anti-Gram+;Gram-... at 42.86%
1      25aa, >Antibacterial... at 35.00%
2      13aa, >Antimicrobial... at 46.15%
3      21aa, >anti-Gram+;antibact... at 47.62%
4      11aa, >antimicrobial... *
5      13aa, >anti-Gram+;antibact... at 46.15%
6      13aa, >anti-Gram+;antibact... at 46.15%
7      30aa, >anti-Gram+;antibact... at 35.00%
8      255aa, >Antimicrobial... *
9      33aa, >antibacterial07548... at 45.45%

```

```

10 14aa, >antibacterial07679... at 42.86%
11 20aa, >antibacterial07943... at 35.00%
12 15aa, >antibacterial08199... at 53.33%
13 16aa, >antibacterial08325... *
14 18aa, >antibacterial08342... at 44.44%
15 16aa, >antibacterial08349... at 43.75%
16 16aa, >antibacterial08357... at 43.75%
17 17aa, >antibacterial08358... at 41.18%
18 16aa, >antibacterial08361... at 43.75%
19 12aa, >antibacterial08991... at 41.67%
20 11aa, >antibacterial09175... at 45.45%
21 11aa, >antibacterial09176... at 45.45%
22 11aa, >antibacterial09177... at 45.45%
23 19aa, >antibacterial09179... at 42.11%
24 12aa, >antibacterial09304... *
25 12aa, >antibacterial09305... at 50.00%
26 32aa, >antibacterial09500... at 43.75%
27 18aa, >antibacterial09812... at 44.44%
28 14aa, >antibacterial10201... at 42.86%
29 18aa, >antibacterial10701... at 44.44%
30 15aa, >antibacterial11664... at 35.00%
31 19aa, >antibacterial11780... at 42.11%
32 13aa, >antibacterial12309... at 46.15%
33 12aa, >antibacterial12475... at 41.67%
34 15aa, >antibacterial12581... at 35.00%
35 18aa, >antibacterial13094... at 44.44%
>Cluster 58
0 14aa, >anti-Gram+;antibact... at 42.86%
1 13aa, >antimicrobial... at 46.15%
2 19aa, >antimicrobial... at 42.11%
3 22aa, >anti-Gram+;antibact... at 40.91%
4 17aa, >Antimicrobial... at 41.18%
5 27aa, >anti-Gram+;antibact... at 40.74%
6 27aa, >antibacterial;antim... at 44.44%
7 20aa, >antibacterial;Antif... at 35.00%
8 37aa, >Antimicrobial;Gram-... at 40.54%
9 255aa, >Antimicrobial... *
10 255aa, >Antimicrobial... at 42.35%
11 255aa, >Antimicrobial... at 56.08%
12 255aa, >Antimicrobial... at 43.53%
13 32aa, >anti-Gram+;antibact... at 40.62%
14 12aa, >antibacterial06537... at 41.67%
15 15aa, >antibacterial07009... *
16 15aa, >antibacterial07520... at 46.67%
17 13aa, >antibacterial07565... at 46.15%
18 18aa, >antibacterial08425... at 44.44%
19 15aa, >antibacterial08435... at 35.00%
20 15aa, >antibacterial08436... at 46.67%
21 12aa, >antibacterial08500... at 41.67%
22 12aa, >antibacterial08966... at 41.67%
23 12aa, >antibacterial08967... at 50.00%
24 18aa, >antibacterial09194... at 44.44%
25 13aa, >antibacterial09590... *
26 14aa, >antibacterial09940... at 42.86%

```

```

27 12aa, >antibacterial10067... at 41.67%
28 43aa, >antibacterial10740... at 41.86%
29 19aa, >antibacterial10855... at 42.11%
30 15aa, >antibacterial10905... at 35.00%
31 20aa, >antibacterial11417... at 35.00%
32 17aa, >antibacterial112920... at 41.18%
>Cluster 59
0 12aa, >antibacterial;antim... *
1 23aa, >antimicrobial... at 43.48%
2 24aa, >antibacterial;antif... at 45.83%
3 24aa, >antimicrobial... at 41.67%
4 24aa, >antibacterial;Antif... *
5 24aa, >Antibacterial;Antif... at 41.67%
6 24aa, >Antibacterial;Antif... at 41.67%
7 24aa, >antibacterial;antim... at 41.67%
8 21aa, >anti-Gram+;Antibact... at 42.86%
9 21aa, >antimicrobial... at 42.86%
10 17aa, >antimicrobial... at 41.18%
11 255aa, >Antibacterial... *
12 32aa, >Antimicrobial... at 40.62%
13 16aa, >antimicrobial... at 43.75%
14 16aa, >antimicrobial... at 50.00%
15 16aa, >antimicrobial... at 43.75%
16 16aa, >antimicrobial... at 43.75%
17 13aa, >antibacterial107455... at 46.15%
18 18aa, >antibacterial108652... at 55.56%
19 11aa, >antibacterial109187... at 45.45%
20 12aa, >antibacterial110130... at 41.67%
21 13aa, >antibacterial110714... at 43.85%
22 14aa, >antibacterial111639... at 50.00%
23 18aa, >antibacterial111834... at 44.44%
24 15aa, >antibacterial111990... *
>Cluster 60
0 119aa, >Antimicrobial... at 47.06%
1 134aa, >Antimicrobial... at 40.30%
2 255aa, >Antimicrobial... *
3 126aa, >Antimicrobial... at 41.27%
4 255aa, >Antimicrobial... at 58.04%
5 255aa, >Antimicrobial... at 59.22%
6 255aa, >Antimicrobial... *
7 20aa, >Antibacterial... at 35.00%
8 30aa, >antibacterial;Antif... at 35.00%
9 255aa, >Antimicrobial... at 58.82%
10 255aa, >Antimicrobial... at 59.61%
11 255aa, >Antimicrobial... at 47.45%
12 32aa, >Anti-Gram-... at 40.62%
13 20aa, >antibacterial107621... at 35.00%
14 20aa, >antibacterial107752... at 45.00%
15 15aa, >antibacterial107976... at 35.00%
16 16aa, >antibacterial108407... at 43.75%
17 14aa, >antibacterial108498... at 42.86%
18 12aa, >antibacterial108499... at 41.67%
19 12aa, >antibacterial108501... at 41.67%
20 19aa, >antibacterial109211... at 47.37%

```

```

21 12aa, >antibacterial10057... at 41.67%
22 15aa, >antibacterial10585... at 35.00%
23 20aa, >antibacterial10960... at 35.00%
24 15aa, >antibacterial11571... at 35.00%
25 18aa, >antibacterial11895... at 44.44%
26 19aa, >antibacterial11934... at 42.11%
27 20aa, >antibacterial12484... at 35.00%
28 20aa, >antibacterial12487... at 35.00%
29 20aa, >antibacterial12490... at 35.00%
30 20aa, >antibacterial12492... at 35.00%
31 20aa, >antibacterial12494... at 35.00%
32 20aa, >antibacterial12496... at 35.00%
33 13aa, >antibacterial13289... *
>Cluster 61
0 24aa, >antimicrobial... at 45.83%
1 27aa, >antimicrobial... at 48.15%
2 21aa, >anti-Gram+;Gram-... at 47.62%
3 13aa, >anti-Gram+;Antibact... at 46.15%
4 27aa, >antimicrobial... at 40.74%
5 23aa, >antimicrobial... *
6 21aa, >antimicrobial... at 42.86%
7 23aa, >Antibacterial... at 43.48%
8 255aa, >Antimicrobial... *
9 11aa, >antibacterial;antim... at 45.45%
10 11aa, >antibacterial;antim... at 45.45%
11 24aa, >antimicrobial... at 41.67%
12 18aa, >antibacterial;antim... at 44.44%
13 25aa, >antibacterial07273... at 35.00%
14 25aa, >antibacterial07278... at 35.00%
15 20aa, >antibacterial07296... at 35.00%
16 20aa, >antibacterial07354... at 35.00%
17 20aa, >antibacterial07356... at 35.00%
18 21aa, >antibacterial07493... at 42.86%
19 14aa, >antibacterial08994... at 42.86%
20 20aa, >antibacterial09769... at 45.00%
21 15aa, >antibacterial09840... at 35.00%
22 14aa, >antibacterial10204... at 42.86%
23 22aa, >antibacterial10350... at 40.91%
24 18aa, >antibacterial10354... *
25 20aa, >antibacterial11316... at 35.00%
26 18aa, >antibacterial11330... at 44.44%
27 18aa, >antibacterial11492... at 50.00%
28 13aa, >antibacterial12275... at 46.15%
29 20aa, >antibacterial12482... at 45.00%
30 18aa, >antibacterial12532... at 50.00%
31 15aa, >antibacterial12838... at 35.00%
32 21aa, >antibacterial13018... *
33 20aa, >antibacterial13026... at 35.00%
34 12aa, >antibacterial13390... at 41.67%
>Cluster 62
0 24aa, >anti-Gram+;antibact... at 41.67%
1 27aa, >antifungal;antimicr... at 40.74%
2 25aa, >antimicrobial... at 48.00%
3 33aa, >antimicrobial... at 42.42%

```

```

4      29aa, >Antimicrobial... at 41.38%
5      28aa, >anti-Gram+;Antibact... at 42.86%
6      22aa, >antibacterial;antim... *
7      21aa, >antimicrobial... at 47.62%
8      255aa, >Antimicrobial... *
9      25aa, >antibacterial;antim... at 35.00%
10     12aa, >antimicrobial... at 41.67%
11     13aa, >antibacterial07705... at 84.62%
12     18aa, >antibacterial08973... at 50.00%
13     16aa, >antibacterial10495... *
14     13aa, >antibacterial12249... at 46.15%
15     13aa, >antibacterial12314... at 46.15%
16     15aa, >antibacterial12728... at 35.00%
17     21aa, >antibacterial13259... at 42.86%
>Cluster 63
0      20aa, >anti-Gram+;antibact... at 45.00%
1      24aa, >antimicrobial... at 41.67%
2      19aa, >Antimicrobial... at 47.37%
3      19aa, >Antimicrobial... at 42.11%
4      21aa, >antimicrobial... at 42.86%
5      36aa, >antimicrobial... at 47.22%
6      23aa, >anti-Gram+;antibact... at 43.48%
7      23aa, >Antimicrobial... *
8      23aa, >antimicrobial... at 47.83%
9      21aa, >antimicrobial... at 42.86%
10     21aa, >anti-Gram-;antibact... at 52.38%
11     21aa, >antimicrobial... at 52.38%
12     23aa, >antimicrobial... at 47.83%
13     28aa, >antimicrobial... at 46.43%
14     21aa, >antimicrobial... *
15     23aa, >antibacterial;Antif... at 47.83%
16     21aa, >antimicrobial... at 42.86%
17     38aa, >anti-Gram-;anti-HIV... at 44.74%
18     11aa, >Antifungal;antimicr... at 45.45%
19     255aa, >Antimicrobial... *
20     17aa, >Antibacterial... at 41.18%
21     33aa, >antibacterial06658... at 42.42%
22     27aa, >antibacterial07086... at 40.74%
23     44aa, >antibacterial07327... at 40.91%
24     21aa, >antibacterial07436... at 42.86%
25     11aa, >antibacterial08223... at 45.45%
26     11aa, >antibacterial08228... at 45.45%
27     16aa, >antibacterial08487... *
28     23aa, >antibacterial08514... at 43.48%
29     18aa, >antibacterial08594... at 44.44%
30     14aa, >antibacterial08644... at 42.86%
31     13aa, >antibacterial08904... at 46.15%
32     20aa, >antibacterial09114... at 35.00%
33     20aa, >antibacterial09115... at 35.00%
34     20aa, >antibacterial09119... at 35.00%
35     15aa, >antibacterial09552... at 35.00%
36     15aa, >antibacterial09605... at 35.00%
37     15aa, >antibacterial09609... at 35.00%
38     12aa, >antibacterial09961... at 41.67%

```

```

39 26aa, >antibacterial10103... at 42.31%
40 24aa, >antibacterial10194... at 41.67%
41 20aa, >antibacterial10227... at 35.00%
42 21aa, >antibacterial10286... *
43 21aa, >antibacterial10288... at 47.62%
44 26aa, >antibacterial10369... at 42.31%
45 21aa, >antibacterial10473... at 47.62%
46 14aa, >antibacterial10475... at 42.86%
47 25aa, >antibacterial10579... at 35.00%
48 25aa, >antibacterial11398... at 35.00%
49 25aa, >antibacterial11423... at 35.00%
50 21aa, >antibacterial11781... at 42.86%
51 23aa, >antibacterial11804... at 43.48%
52 23aa, >antibacterial11807... at 43.48%
53 27aa, >antibacterial11865... at 40.74%
54 19aa, >antibacterial11880... at 47.37%
55 12aa, >antibacterial11978... at 41.67%
56 20aa, >antibacterial12031... at 35.00%
57 18aa, >antibacterial12610... at 44.44%
58 14aa, >antibacterial12883... at 42.86%
59 20aa, >antibacterial13287... at 35.00%
60 14aa, >antibacterial13322... at 42.86%
61 20aa, >antibacterial13355... at 35.00%
62 36aa, >antibacterial13383... *
63 20aa, >antibacterial13389... at 35.00%
>Cluster 64
0 26aa, >Antimicrobial... *
1 11aa, >antibacterial... at 45.45%
2 12aa, >anti-Gram+;antibact... at 41.67%
3 13aa, >antimicrobial... at 46.15%
4 18aa, >antibacterial;Antif... at 44.44%
5 14aa, >antimicrobial... at 42.86%
6 255aa, >Antimicrobial... *
7 18aa, >antibacterial;Antif... at 44.44%
8 15aa, >antimicrobial... at 35.00%
9 15aa, >antimicrobial... at 35.00%
10 19aa, >antibacterial07299... at 42.11%
11 18aa, >antibacterial07334... at 44.44%
12 18aa, >antibacterial07335... at 50.00%
13 18aa, >antibacterial07336... at 44.44%
14 17aa, >antibacterial08329... at 41.18%
15 15aa, >antibacterial08531... at 35.00%
16 12aa, >antibacterial09257... at 41.67%
17 20aa, >antibacterial09401... at 35.00%
18 20aa, >antibacterial09931... at 35.00%
19 17aa, >antibacterial10626... at 41.18%
20 13aa, >antibacterial12040... at 46.15%
21 15aa, >antibacterial12113... at 35.00%
22 13aa, >antibacterial12676... *
>Cluster 65
0 11aa, >Antibacterial... at 45.45%
1 21aa, >antimicrobial... at 42.86%
2 30aa, >Antimicrobial... at 35.00%
3 20aa, >Antibacterial;Antif... at 55.00%

```

4 24aa, >antibacterial;antim... at 41.67%  
5 25aa, >antibacterial;Antif... at 44.00%  
6 255aa, >Antimicrobial... \*  
7 21aa, >antibacterial07369... at 42.86%  
8 22aa, >antibacterial07381... at 45.45%  
9 12aa, >antibacterial08116... at 41.67%  
10 13aa, >antibacterial08161... at 46.15%  
11 24aa, >antibacterial08278... at 41.67%  
12 11aa, >antibacterial08519... at 45.45%  
13 11aa, >antibacterial08520... at 45.45%  
14 19aa, >antibacterial08535... at 42.11%  
15 14aa, >antibacterial09070... at 42.86%  
16 14aa, >antibacterial09259... at 42.86%  
17 16aa, >antibacterial09846... at 43.75%  
18 19aa, >antibacterial10100... at 42.11%  
19 14aa, >antibacterial11951... \*  
20 18aa, >antibacterial12576... at 44.44%  
21 20aa, >antibacterial12621... at 45.00%  
22 18aa, >antibacterial12688... at 44.44%  
23 20aa, >antibacterial12727... at 45.00%  
24 20aa, >antibacterial12953... at 35.00%  
25 18aa, >antibacterial13096... \*  
26 12aa, >antibacterial13411... at 50.00%

>Cluster 66

0 13aa, >anti-Gram+;Antimicr... \*  
1 20aa, >Antibacterial... at 35.00%  
2 20aa, >anti-Gram+;Antibact... at 35.00%  
3 12aa, >Antibacterial... at 41.67%  
4 17aa, >anti-Gram+;Antibact... at 41.18%  
5 28aa, >anti-Gram+;antibact... at 42.86%  
6 11aa, >antibacterial;Antif... at 45.45%  
7 255aa, >Antimicrobial... \*  
8 22aa, >antimicrobial... at 40.91%  
9 215aa, >Antimicrobial... \*  
10 33aa, >Antimicrobial... at 48.48%  
11 23aa, >antibacterial06453... at 43.48%  
12 14aa, >antibacterial07518... at 42.86%  
13 20aa, >antibacterial07537... at 35.00%  
14 24aa, >antibacterial07723... at 41.67%  
15 24aa, >antibacterial07724... at 41.67%  
16 13aa, >antibacterial08080... at 46.15%  
17 12aa, >antibacterial08120... \*  
18 15aa, >antibacterial08648... at 35.00%  
19 12aa, >antibacterial08952... at 41.67%  
20 19aa, >antibacterial09291... at 42.11%  
21 11aa, >antibacterial09320... at 54.55%  
22 18aa, >antibacterial09897... at 44.44%  
23 11aa, >antibacterial10560... at 45.45%  
24 17aa, >antibacterial10719... at 58.82%  
25 22aa, >antibacterial10724... at 45.45%  
26 14aa, >antibacterial12083... at 50.00%  
27 12aa, >antibacterial12529... at 50.00%  
28 17aa, >antibacterial12696... at 41.18%  
29 22aa, >antibacterial12720... at 45.45%



```

30    16aa, >antibacterial113016... at 43.75%
31    30aa, >antibacterial113057... at 43.33%
32    19aa, >antibacterial113111... at 42.11%
33    19aa, >antibacterial113133... at 42.11%
34    20aa, >antibacterial113362... at 35.00%
>Cluster 67
0     23aa, >antibacterial;antif... *
1     33aa, >antibacterial;antif... at 42.42%
2     22aa, >antimicrobial... at 45.45%
3     255aa, >Antimicrobial... *
4     29aa, >antimicrobial... at 41.38%
5     23aa, >antibacterial08217... at 43.48%
6     18aa, >antibacterial09158... at 44.44%
7     28aa, >antibacterial09929... at 42.86%
8     18aa, >antibacterial110783... at 44.44%
9     25aa, >antibacterial111381... at 35.00%
10    12aa, >antibacterial111959... at 41.67%
11    20aa, >antibacterial112780... at 45.00%
12    20aa, >antibacterial112936... at 35.00%
13    12aa, >antibacterial113084... at 41.67%
14    38aa, >antibacterial113200... at 42.11%
>Cluster 68
0     13aa, >antimicrobial... *
1     19aa, >anti-Gram+;antibact... at 42.11%
2     27aa, >antimicrobial... at 40.74%
3     19aa, >anti-Gram+;Antimicr... at 42.11%
4     33aa, >anti-Gram+;Antibact... at 42.42%
5     25aa, >antibiotic... at 35.00%
6     255aa, >Antimicrobial... *
7     18aa, >Antimicrobial... at 44.44%
8     12aa, >antifungal;antimicr... at 41.67%
9     15aa, >antimicrobial... at 35.00%
10    17aa, >antibacterial06529... at 41.18%
11    11aa, >antibacterial07308... at 45.45%
12    17aa, >antibacterial07749... at 41.18%
13    16aa, >antibacterial08060... at 43.75%
14    22aa, >antibacterial08730... at 40.91%
15    12aa, >antibacterial08788... at 41.67%
16    20aa, >antibacterial09095... at 35.00%
17    14aa, >antibacterial110717... *
18    15aa, >antibacterial111478... at 35.00%
19    17aa, >antibacterial112022... at 47.06%
20    13aa, >antibacterial112291... at 46.15%
21    20aa, >antibacterial112884... at 45.00%
>Cluster 69
0     16aa, >antibacterial;antim... at 43.75%
1     24aa, >antimicrobial... at 45.83%
2     24aa, >antimicrobial... at 41.67%
3     20aa, >antimicrobial... at 35.00%
4     23aa, >antimicrobial... at 43.48%
5     24aa, >antibacterial;antim... at 41.67%
6     24aa, >active... at 45.83%
7     24aa, >antibacterial;Antif... at 45.83%
8     13aa, >antibacterial;antif... at 46.15%

```

```

9      255aa, >Antimicrobial... *
10     13aa, >Antimicrobial... at 46.15%
11     14aa, >antibacterial07027... at 42.86%
12     13aa, >antibacterial08409... at 46.15%
13     14aa, >antibacterial09260... at 50.00%
14     11aa, >antibacterial09310... at 45.45%
15     20aa, >antibacterial10034... at 35.00%
16     13aa, >antibacterial10462... *
17     13aa, >antibacterial10470... at 46.15%
18     23aa, >antibacterial10664... at 43.48%
19     20aa, >antibacterial10955... at 45.00%
20     18aa, >antibacterial11186... at 44.44%
21     13aa, >antibacterial111950... at 46.15%
22     21aa, >antibacterial112337... at 42.86%
23     26aa, >antibacterial112350... at 46.15%
24     15aa, >antibacterial112870... at 35.00%
25     12aa, >antibacterial112882... at 41.67%
26     15aa, >antibacterial113386... *
>Cluster 70
0      21aa, >antimicrobial... at 42.86%
1      31aa, >antimicrobial... at 41.94%
2      31aa, >antimicrobial... at 41.94%
3      30aa, >Antimicrobial;Antim... at 35.00%
4      30aa, >Antimicrobial;Antim... at 35.00%
5      23aa, >antimicrobial... *
6      30aa, >antimicrobial... at 35.00%
7      23aa, >Antimicrobial;Gram-... at 47.83%
8      13aa, >antimicrobial... at 46.15%
9      255aa, >Antimicrobial... *
10     15aa, >antibacterial06993... *
11     16aa, >antibacterial07007... at 43.75%
12     15aa, >antibacterial07522... at 35.00%
13     15aa, >antibacterial07913... at 35.00%
14     18aa, >antibacterial09198... at 44.44%
15     15aa, >antibacterial09736... at 35.00%
16     17aa, >antibacterial10447... at 41.18%
17     13aa, >antibacterial112064... at 46.15%
18     20aa, >antibacterial112377... at 35.00%
19     12aa, >antibacterial112624... at 41.67%
20     13aa, >antibacterial112813... at 46.15%
21     12aa, >antibacterial112859... at 41.67%
22     13aa, >antibacterial112982... at 53.85%
23     16aa, >antibacterial113227... at 50.00%
>Cluster 71
0      22aa, >anti-Gram+;antibact... at 40.91%
1      26aa, >antimicrobial... at 42.31%
2      255aa, >Antibacterial... *
3      64aa, >antibacterial06502... at 40.62%
4      15aa, >antibacterial07010... at 35.00%
5      19aa, >antibacterial08232... at 52.63%
6      20aa, >antibacterial08250... at 35.00%
7      24aa, >antibacterial08346... at 41.67%
8      19aa, >antibacterial08853... at 57.89%
9      19aa, >antibacterial08854... at 57.89%

```

```

10 19aa, >antibacterial08856... at 57.89%
11 19aa, >antibacterial08868... *
12 21aa, >antibacterial08870... at 63.16%
13 21aa, >antibacterial08874... at 52.63%
14 19aa, >antibacterial08876... at 57.89%
15 18aa, >antibacterial08877... at 57.89%
16 18aa, >antibacterial08943... *
17 18aa, >antibacterial09066... at 61.11%
18 21aa, >antibacterial09067... at 57.14%
19 19aa, >antibacterial09068... at 63.16%
20 18aa, >antibacterial09192... at 55.56%
21 18aa, >antibacterial09193... at 61.11%
22 18aa, >antibacterial09196... at 61.11%
23 28aa, >antibacterial09209... at 46.43%
24 26aa, >antibacterial09210... at 46.15%
25 20aa, >antibacterial09334... at 35.00%
26 13aa, >antibacterial09594... at 46.15%
27 13aa, >antibacterial09596... at 61.54%
28 18aa, >antibacterial09777... at 61.11%
29 18aa, >antibacterial09778... at 61.11%
30 18aa, >antibacterial09781... at 61.11%
31 16aa, >antibacterial10090... at 68.75%
32 19aa, >antibacterial10092... at 47.37%
33 19aa, >antibacterial10093... at 47.37%
34 19aa, >antibacterial10094... at 42.11%
35 19aa, >antibacterial10095... at 47.37%
36 19aa, >antibacterial10096... *
37 19aa, >antibacterial10097... at 52.63%
38 19aa, >antibacterial10098... at 57.89%
39 19aa, >antibacterial10099... at 52.63%
40 19aa, >antibacterial10101... at 57.89%
41 20aa, >antibacterial10143... *
42 19aa, >antibacterial10145... at 63.16%
43 23aa, >antibacterial10401... at 43.48%
44 23aa, >antibacterial10403... at 43.48%
45 20aa, >antibacterial10404... *
46 21aa, >antibacterial10405... at 61.90%
47 21aa, >antibacterial10406... at 57.14%
48 15aa, >antibacterial10584... at 35.00%
49 22aa, >antibacterial10653... at 54.55%
50 23aa, >antibacterial10654... at 54.55%
51 19aa, >antibacterial10668... at 52.63%
52 17aa, >antibacterial10892... at 47.06%
53 13aa, >antibacterial12811... at 46.15%
54 13aa, >antibacterial12812... at 46.15%
55 13aa, >antibacterial12814... at 53.85%
56 13aa, >antibacterial12815... at 53.85%
57 15aa, >antibacterial12819... at 53.33%
58 21aa, >antibacterial12997... at 42.86%
59 19aa, >antibacterial13228... at 63.16%
>Cluster 72
0 16aa, >antimicrobial... at 43.75%
1 11aa, >Antimicrobial;Antim... at 45.45%
2 18aa, >anti-Gram+;antibact... at 44.44%

```

3 22aa, >antimicrobial... at 40.91%  
4 15aa, >Antibacterial;Antim... at 53.33%  
5 255aa, >Antibacterial... \*  
6 255aa, >Antibacterial... at 66.08%  
7 23aa, >antibacterial06650... at 43.48%  
8 20aa, >antibacterial06653... at 35.00%  
9 11aa, >antibacterial09625... at 45.45%  
10 12aa, >antibacterial09784... at 41.67%  
11 12aa, >antibacterial09786... at 41.67%  
12 12aa, >antibacterial09787... at 50.00%  
13 12aa, >antibacterial09788... at 41.67%  
14 11aa, >antibacterial09830... \*  
15 20aa, >antibacterial09996... at 35.00%

>Cluster 73

0 21aa, >antimicrobial... at 42.86%  
1 20aa, >antimicrobial... at 35.00%  
2 18aa, >antimicrobial... at 44.44%  
3 22aa, >antimicrobial... at 45.45%  
4 25aa, >antimicrobial... at 44.00%  
5 26aa, >Antimicrobial... at 42.31%  
6 27aa, >anti-Gram+;antibact... at 40.74%  
7 25aa, >antibacterial;Antif... at 35.00%  
8 18aa, >anti-Gram+;antibact... \*  
9 28aa, >anti-Gram+;antibact... at 46.43%  
10 29aa, >anti-Gram+;antibact... at 41.38%  
11 28aa, >antimicrobial... at 46.43%  
12 255aa, >Antimicrobial... \*  
13 20aa, >antimicrobial... at 35.00%  
14 30aa, >Antimicrobial... at 35.00%  
15 18aa, >antibacterial07725... at 44.44%  
16 20aa, >antibacterial07743... at 45.00%  
17 20aa, >antibacterial07957... at 35.00%  
18 17aa, >antibacterial08092... \*  
19 18aa, >antibacterial08231... at 44.44%  
20 20aa, >antibacterial08388... at 35.00%  
21 28aa, >antibacterial08819... at 42.86%  
22 12aa, >antibacterial09959... at 41.67%  
23 12aa, >antibacterial09960... at 41.67%  
24 19aa, >antibacterial11130... at 42.11%  
25 20aa, >antibacterial11364... at 50.00%  
26 27aa, >antibacterial11873... \*  
27 27aa, >antibacterial11874... at 40.74%  
28 18aa, >antibacterial12144... at 44.44%  
29 23aa, >antibacterial12764... at 43.48%  
30 27aa, >antibacterial13295... at 44.44%

>Cluster 74

0 26aa, >anti-Gram+;antibact... at 42.31%  
1 27aa, >antibacterial... at 44.44%  
2 255aa, >Antimicrobial... \*  
3 23aa, >antimicrobial... at 43.48%  
4 15aa, >antimicrobial... at 35.00%  
5 14aa, >antibacterial06992... at 42.86%  
6 12aa, >antibacterial07013... at 41.67%  
7 26aa, >antibacterial07060... at 42.31%

```

8      25aa, >antibacterial08072... at 35.00%
9      12aa, >antibacterial09258... at 41.67%
10     11aa, >antibacterial09575... at 45.45%
11     13aa, >antibacterial09602... *
12     13aa, >antibacterial10283... at 46.15%
13     11aa, >antibacterial10594... at 45.45%
14     22aa, >antibacterial11254... at 45.45%
15     18aa, >antibacterial11818... at 44.44%
16     20aa, >antibacterial11883... at 35.00%
17     18aa, >antibacterial12893... at 44.44%
>Cluster 75
0      18aa, >antimicrobial... *
1      15aa, >antimicrobial... at 35.00%
2      255aa, >Antimicrobial... *
3      19aa, >antibacterial08861... at 47.37%
4      14aa, >antibacterial10120... at 42.86%
5      15aa, >antibacterial10421... at 46.67%
6      18aa, >antibacterial12900... at 44.44%
>Cluster 76
0      17aa, >antibacterial;antim... at 41.18%
1      26aa, >antibacterial... *
2      18aa, >Antimicrobial... *
3      24aa, >antibacterial;Antif... at 45.83%
4      25aa, >antibacterial;Antif... at 35.00%
5      16aa, >Antimicrobial... at 43.75%
6      14aa, >anti-Gram+;antibact... at 42.86%
7      25aa, >Antimicrobial... at 35.00%
8      28aa, >Antibacterial... at 46.43%
9      36aa, >antibacterial;antim... at 41.67%
10     255aa, >Antimicrobial... *
11     17aa, >Antifungal... at 47.06%
12     26aa, >anti-Gram+;Gram-... at 42.31%
13     13aa, >antibacterial... at 46.15%
14     13aa, >antibacterial07400... at 46.15%
15     22aa, >antibacterial07609... at 40.91%
16     11aa, >antibacterial07874... at 45.45%
17     20aa, >antibacterial08046... at 35.00%
18     19aa, >antibacterial08051... at 47.37%
19     20aa, >antibacterial09427... at 35.00%
20     24aa, >antibacterial09533... at 41.67%
21     18aa, >antibacterial09718... at 44.44%
22     15aa, >antibacterial09839... at 46.67%
23     18aa, >antibacterial12120... at 44.44%
>Cluster 77
0      14aa, >antibacterial;Antif... *
1      32aa, >antimicrobial... at 43.75%
2      30aa, >antimicrobial... at 35.00%
3      27aa, >antibacterial;antim... at 40.74%
4      35aa, >Antifungal;antimicr... at 54.29%
5      17aa, >anti-Gram+;Antimicr... at 41.18%
6      255aa, >Antimicrobial... *
7      13aa, >anti-Gram+;antibact... at 53.85%
8      29aa, >antibacterial06654... at 32.38%
9      26aa, >antibacterial07529... at 42.31%

```

```

10 18aa, >antibacterial08003... at 44.44%
11 25aa, >antibacterial08005... at 35.00%
12 13aa, >antibacterial08176... at 46.15%
13 20aa, >antibacterial09098... at 50.00%
14 12aa, >antibacterial09519... at 41.67%
15 21aa, >antibacterial10343... at 47.62%
16 21aa, >antibacterial10456... at 42.86%
17 19aa, >antibacterial10516... at 47.37%
18 14aa, >antibacterial10640... at 50.00%
19 20aa, >antibacterial10738... at 45.00%
20 20aa, >antibacterial10739... at 45.00%
21 15aa, >antibacterial11295... at 35.00%
22 21aa, >antibacterial11668... at 52.38%
23 15aa, >antibacterial11738... at 35.00%
24 17aa, >antibacterial11926... at 41.18%
25 17aa, >antibacterial11975... at 41.18%
26 15aa, >antibacterial11998... at 35.00%
27 15aa, >antibacterial12334... at 35.00%
28 20aa, >antibacterial12480... at 35.00%
29 20aa, >antibacterial12485... at 35.00%
30 20aa, >antibacterial12486... at 35.00%
31 15aa, >antibacterial13085... *
32 15aa, >antibacterial13180... at 46.67%
33 20aa, >antibacterial13367... at 35.00%
>Cluster 78
0 27aa, >anti-Gram+;antibact... at 40.74%
1 16aa, >anti-Gram+;antibact... at 43.75%
2 16aa, >antimicrobial... at 43.75%
3 24aa, >antimicrobial... at 41.67%
4 14aa, >anti-Gram+;Antibact... at 50.00%
5 255aa, >Antimicrobial... *
6 37aa, >anti-Gram+;antibact... at 40.54%
7 11aa, >antibacterial07857... at 45.45%
8 11aa, >antibacterial07867... at 45.45%
9 15aa, >antibacterial07977... at 35.00%
10 18aa, >antibacterial08509... at 44.44%
11 19aa, >antibacterial08666... *
12 19aa, >antibacterial11628... at 47.37%
13 18aa, >antibacterial13123... at 44.44%
>Cluster 79
0 13aa, >antimicrobial... *
1 27aa, >anti-Gram+;antibact... at 40.74%
2 29aa, >antimicrobial... at 41.38%
3 27aa, >antibacterial;Antif... at 40.74%
4 22aa, >Antibacterial;Antim... at 40.91%
5 26aa, >antimicrobial... at 46.15%
6 31aa, >antimicrobial... at 41.94%
7 23aa, >antimicrobial... at 43.48%
8 25aa, >antibacterial;antim... at 35.00%
9 25aa, >Antimicrobial... at 35.00%
10 255aa, >Antimicrobial... *
11 255aa, >Antimicrobial... at 67.06%
12 255aa, >Antibacterial... at 71.76%
13 18aa, >antibacterial07556... at 44.44%

```

```

14    20aa, >antibacterial08546... at 35.00%
15    20aa, >antibacterial09426... at 35.00%
16    16aa, >antibacterial10496... at 43.75%
17    25aa, >antibacterial10580... at 35.00%
18    20aa, >antibacterial10950... at 35.00%
19    16aa, >antibacterial11279... at 43.75%
20    27aa, >antibacterial11802... at 40.74%
21    18aa, >antibacterial12843... at 44.44%
>Cluster 80
0     24aa, >antimicrobial... at 41.67%
1     20aa, >antimicrobial... at 35.00%
2     21aa, >anti-Gram+;antibact... *
3     24aa, >antibacterial;Antif... at 41.67%
4     24aa, >antimicrobial... at 45.83%
5     15aa, >antimicrobial... at 35.00%
6     25aa, >Antimicrobial... at 44.00%
7     11aa, >antimicrobial... at 45.45%
8     255aa, >Antimicrobial... *
9     22aa, >anti-Gram-;antibact... at 40.91%
10    69aa, >Antimicrobial... *
11    25aa, >antibacterial06532... at 35.00%
12    20aa, >antibacterial07367... at 35.00%
13    20aa, >antibacterial07751... at 35.00%
14    17aa, >antibacterial08091... at 47.06%
15    18aa, >antibacterial08102... at 44.44%
16    18aa, >antibacterial08105... at 44.44%
17    32aa, >antibacterial08200... at 40.62%
18    25aa, >antibacterial08202... at 35.00%
19    17aa, >antibacterial08258... *
20    17aa, >antibacterial08330... at 52.94%
21    17aa, >antibacterial08336... at 47.06%
22    18aa, >antibacterial08340... at 44.44%
23    18aa, >antibacterial08341... *
24    17aa, >antibacterial08351... at 52.94%
25    17aa, >antibacterial08353... at 47.06%
26    21aa, >antibacterial08451... at 47.62%
27    15aa, >antibacterial08686... at 35.00%
28    15aa, >antibacterial08759... at 35.00%
29    11aa, >antibacterial08908... at 45.45%
30    27aa, >antibacterial08927... at 40.74%
31    12aa, >antibacterial08962... at 41.67%
32    20aa, >antibacterial09112... at 35.00%
33    18aa, >antibacterial09162... at 50.00%
34    11aa, >antibacterial09168... at 54.55%
35    11aa, >antibacterial09188... at 54.55%
36    11aa, >antibacterial09338... at 45.45%
37    29aa, >antibacterial09505... at 41.38%
38    24aa, >antibacterial09532... at 41.67%
39    25aa, >antibacterial09534... at 35.00%
40    25aa, >antibacterial09536... at 44.00%
41    15aa, >antibacterial09713... at 35.00%
42    16aa, >antibacterial10280... at 43.75%
43    26aa, >antibacterial10293... at 42.31%
44    22aa, >antibacterial10303... at 40.91%

```

```

45 18aa, >antibacterial10414... at 44.44%
46 13aa, >antibacterial10513... at 46.15%
47 13aa, >antibacterial10549... at 46.15%
48 14aa, >antibacterial10554... at 42.86%
49 18aa, >antibacterial10573... at 44.44%
50 11aa, >antibacterial10672... at 45.45%
51 11aa, >antibacterial10673... at 45.45%
52 15aa, >antibacterial10796... at 35.00%
53 13aa, >antibacterial10838... *
54 20aa, >antibacterial10842... at 35.00%
55 25aa, >antibacterial10852... at 48.00%
56 26aa, >antibacterial11613... at 50.00%
57 27aa, >antibacterial11669... at 40.74%
58 15aa, >antibacterial12599... at 35.00%
>Cluster 81
0 68aa, >anti-Gram+;Gram-... *
1 24aa, >anti-Gram+;Antibact... at 45.83%
2 21aa, >antimicrobial... at 47.62%
3 20aa, >antimicrobial... at 35.00%
4 21aa, >antimicrobial... at 42.86%
5 27aa, >antibacterial;antim... at 40.74%
6 22aa, >antimicrobial... at 45.45%
7 27aa, >Antimicrobial... at 40.74%
8 248aa, >Antimicrobial... at 52.82%
9 248aa, >Antimicrobial... at 53.23%
10 133aa, >Antimicrobial... at 41.35%
11 255aa, >Antimicrobial... *
12 15aa, >Antibacterial... at 46.67%
13 13aa, >Antimicrobial... at 46.15%
14 21aa, >Antimicrobial... at 47.62%
15 17aa, >antibacterial08268... at 41.18%
16 20aa, >antibacterial09287... at 35.00%
17 20aa, >antibacterial09397... at 35.00%
18 15aa, >antibacterial11270... at 35.00%
19 15aa, >antibacterial12405... *
20 14aa, >antibacterial13074... at 42.86%
>Cluster 82
0 29aa, >anti-Gram+;antibact... at 34.83%
1 28aa, >antibacterial;antim... at 32.86%
2 28aa, >antimicrobial... at 32.86%
3 28aa, >anti-Gram-;antifung... at 42.86%
4 31aa, >antimicrobial... at 41.94%
5 20aa, >anti-Gram-;antibact... at 45.00%
6 255aa, >Antimicrobial... *
7 255aa, >Antimicrobial... at 70.98%
8 31aa, >antimicrobial... at 41.94%
9 26aa, >antibacterial06554... at 42.31%
10 12aa, >antibacterial06619... at 35.00%
11 21aa, >antibacterial06978... at 42.86%
12 18aa, >antibacterial07918... at 44.44%
13 17aa, >antibacterial08021... at 41.18%
14 13aa, >antibacterial08525... *
15 34aa, >antibacterial08881... at 44.12%
16 25aa, >antibacterial09265... at 35.00%

```



```

17 13aa, >antibacterial09282... at 53.85%
18 18aa, >antibacterial09710... at 44.44%
19 14aa, >antibacterial10200... at 42.86%
20 30aa, >antibacterial10255... at 30.00%
21 22aa, >antibacterial10727... at 30.91%
22 19aa, >antibacterial10762... at 32.11%
23 24aa, >antibacterial11678... at 31.67%
24 13aa, >antibacterial12154... at 36.15%
25 18aa, >antibacterial12538... *
26 16aa, >antibacterial12816... at 33.75%
27 18aa, >antibacterial12977... at 34.44%
>Cluster 83
0 40aa, >antimicrobial;Antim... at 42.50%
1 13aa, >antibacterial;antim... at 46.15%
2 19aa, >antibacterial;antif... at 42.11%
3 19aa, >Antimicrobial... *
4 24aa, >antimicrobial... at 41.67%
5 255aa, >Antimicrobial... *
6 18aa, >Antibacterial;Antif... at 44.44%
7 21aa, >antibacterial07898... at 47.62%
8 11aa, >antibacterial08220... at 45.45%
9 11aa, >antibacterial08565... at 54.55%
10 11aa, >antibacterial09626... at 45.45%
11 15aa, >antibacterial10348... at 35.00%
12 22aa, >antibacterial10523... at 40.91%
13 12aa, >antibacterial11786... *
14 15aa, >antibacterial11954... at 43.33%
15 13aa, >antibacterial12042... at 46.15%
16 17aa, >antibacterial12376... at 52.94%
17 18aa, >antibacterial12731... at 44.44%
18 17aa, >antibacterial13371... at 41.18%
>Cluster 84
0 20aa, >antimicrobial... *
1 255aa, >Antimicrobial... *
2 13aa, >antimicrobial... at 46.15%
3 23aa, >antimicrobial... at 43.48%
4 12aa, >antibacterial08027... at 41.67%
5 23aa, >antibacterial08719... at 43.48%
6 21aa, >antibacterial09182... at 42.86%
7 21aa, >antibacterial09195... at 42.86%
8 29aa, >antibacterial11118... at 41.38%
9 17aa, >antibacterial11734... at 41.18%
10 20aa, >antibacterial12825... at 45.00%
11 19aa, >antibacterial13132... at 42.11%
>Cluster 85
0 14aa, >antimicrobial... *
1 20aa, >antimicrobial... at 35.00%
2 17aa, >Antibacterial... at 41.18%
3 13aa, >Antibacterial... at 46.15%
4 255aa, >Antimicrobial... *
5 25aa, >antibacterial07748... at 35.00%
6 12aa, >antibacterial07901... *
7 11aa, >antibacterial08427... at 45.45%
8 21aa, >antibacterial09308... at 42.86%

```

9 11aa, >antibacterial09315... at 45.45%  
10 20aa, >antibacterial09390... at 45.00%  
11 14aa, >antibacterial09487... at 42.86%  
12 13aa, >antibacterial09595... at 46.15%  
13 13aa, >antibacterial09600... at 46.15%  
14 13aa, >antibacterial10054... at 46.15%  
15 15aa, >antibacterial10418... at 35.00%  
16 28aa, >antibacterial10453... at 46.43%  
17 13aa, >antibacterial10468... at 53.85%  
18 13aa, >antibacterial10484... at 46.15%  
19 13aa, >antibacterial10486... at 46.15%  
20 12aa, >antibacterial10487... at 41.67%  
21 14aa, >antibacterial10867... at 42.86%  
22 18aa, >antibacterial11273... at 44.44%  
23 12aa, >antibacterial11461... at 41.67%  
24 13aa, >antibacterial11725... at 46.15%  
25 13aa, >antibacterial112360... at 46.15%  
26 15aa, >antibacterial113380... at 35.00%

>Cluster 86

0 19aa, >antibacterial;antif... at 42.11%  
1 29aa, >Antimicrobial... at 44.83%  
2 20aa, >Antibacterial... \*  
3 255aa, >Antimicrobial... \*  
4 18aa, >antibacterial07044... at 44.44%  
5 13aa, >antibacterial07650... at 46.15%  
6 11aa, >antibacterial07730... at 45.45%  
7 20aa, >antibacterial07952... at 45.00%  
8 13aa, >antibacterial08031... at 46.15%  
9 13aa, >antibacterial08291... at 46.15%  
10 22aa, >antibacterial08461... at 40.91%  
11 13aa, >antibacterial08907... at 46.15%  
12 11aa, >antibacterial09154... at 45.45%  
13 11aa, >antibacterial09183... at 45.45%  
14 20aa, >antibacterial09395... at 45.00%  
15 20aa, >antibacterial09422... at 55.00%  
16 20aa, >antibacterial09430... at 45.00%  
17 27aa, >antibacterial09752... at 40.74%  
18 18aa, >antibacterial111902... at 44.44%  
19 22aa, >antibacterial111956... at 40.91%  
20 24aa, >antibacterial112700... \*  
21 20aa, >antibacterial113307... at 35.00%

>Cluster 87

0 26aa, >antimicrobial... at 42.31%  
1 24aa, >antimicrobial... at 43.83%  
2 24aa, >antibacterial;Antif... at 41.67%  
3 20aa, >antibacterial;antim... at 35.00%  
4 24aa, >antimicrobial... at 41.67%  
5 255aa, >Antimicrobial... \*  
6 30aa, >Antimicrobial... at 35.00%  
7 21aa, >antimicrobial... at 42.86%  
8 19aa, >anti-Gram+;antibact... at 42.11%  
9 20aa, >antibacterial07357... at 35.00%  
10 14aa, >antibacterial07984... at 42.86%  
11 20aa, >antibacterial09423... \*

```

12    20aa, >antibacterial09455... at 35.00%
13    17aa, >antibacterial11444... at 41.18%
14    11aa, >antibacterial11522... at 45.45%
15    36aa, >antibacterial12660... at 41.67%
>Cluster 88
0     30aa, >Antibacterial;Antim... at 35.00%
1     30aa, >Antifungal... at 35.00%
2     28aa, >anti-Gram+;antibact... at 42.86%
3     255aa, >Antimicrobial... *
4     255aa, >Antimicrobial... at 68.24%
5     255aa, >Antimicrobial... at 69.02%
6     21aa, >antibacterial07597... at 42.86%
7     21aa, >antibacterial07598... at 42.86%
8     21aa, >antibacterial07601... at 42.86%
9     11aa, >antibacterial09577... *
10    26aa, >antibacterial110102... at 42.31%
11    13aa, >antibacterial110425... at 46.15%
12    13aa, >antibacterial110435... at 46.15%
13    13aa, >antibacterial110553... at 53.85%
14    18aa, >antibacterial110787... at 44.44%
15    23aa, >antibacterial112831... at 43.48%
16    25aa, >antibacterial112841... at 35.00%
17    12aa, >antibacterial113281... at 41.67%
>Cluster 89
0     33aa, >antibacterial... at 42.42%
1     19aa, >Antibacterial;Antim... at 42.11%
2     17aa, >antimicrobial... *
3     23aa, >anti-Gram+;antibact... at 47.83%
4     255aa, >Antibacterial... *
5     21aa, >Antimicrobial... at 42.86%
6     255aa, >Antibacterial... at 47.06%
7     255aa, >Antibacterial... at 48.24%
8     255aa, >Antibacterial... at 61.18%
9     255aa, >Antibacterial... at 59.22%
10    11aa, >antibacterial106633... at 54.55%
11    18aa, >antibacterial106648... at 55.56%
12    15aa, >antibacterial108193... at 35.00%
13    12aa, >antibacterial108590... at 41.67%
14    12aa, >antibacterial108591... at 58.33%
15    12aa, >antibacterial108789... at 41.67%
16    13aa, >antibacterial108901... at 53.85%
17    15aa, >antibacterial109530... *
18    17aa, >antibacterial110442... at 41.18%
19    37aa, >antibacterial110683... at 40.54%
20    16aa, >antibacterial111113... at 43.75%
21    18aa, >antibacterial111137... at 44.44%
22    13aa, >antibacterial111304... at 46.15%
23    18aa, >antibacterial111314... at 44.44%
24    23aa, >antibacterial111328... at 47.83%
25    13aa, >antibacterial112361... at 53.85%
26    28aa, >antibacterial112744... at 42.86%
27    20aa, >antibacterial112932... at 35.00%
28    20aa, >antibacterial113189... at 45.00%
>Cluster 90

```

```
0    30aa, >antifungal;antimicr... at 35.00%
1    26aa, >antimicrobial... at 42.31%
2    241aa, >Antibacterial... *
3    255aa, >Antibacterial... *
4    11aa, >Antifungal... at 45.45%
5    20aa, >antibacterial06685... at 35.00%
6    27aa, >antibacterial07173... at 40.74%
7    37aa, >antibacterial07377... at 40.54%
8    24aa, >antibacterial07824... at 41.67%
9    18aa, >antibacterial09069... at 44.44%
10   13aa, >antibacterial09285... at 46.15%
11   27aa, >antibacterial09754... at 40.74%
12   23aa, >antibacterial10041... at 43.48%
13   27aa, >antibacterial11837... *
14   21aa, >antibacterial11843... at 47.62%
15   29aa, >antibacterial12863... at 44.83%
```

>Cluster 91

```
0    255aa, >Antibacterial;Antif... *
1    25aa, >antibacterial06964... at 35.00%
2    25aa, >antibacterial07379... at 35.00%
3    11aa, >antibacterial07737... at 45.45%
4    18aa, >antibacterial07887... at 44.44%
5    11aa, >antibacterial08225... at 45.45%
6    14aa, >antibacterial08449... at 42.86%
7    16aa, >antibacterial08845... at 43.75%
8    17aa, >antibacterial09169... at 47.06%
9    11aa, >antibacterial09350... *
10   20aa, >antibacterial09355... at 35.00%
11   19aa, >antibacterial09928... at 42.11%
12   12aa, >antibacterial10146... at 41.67%
13   12aa, >antibacterial10159... at 41.67%
14   15aa, >antibacterial10463... at 53.33%
15   15aa, >antibacterial10466... at 35.00%
```

>Cluster 92

```
0    24aa, >antimicrobial... at 41.67%
1    254aa, >Antimicrobial... *
2    13aa, >antibacterial;antim... *
3    24aa, >anti-Gram+;antibact... at 41.67%
4    24aa, >anti-Gram+;antibact... at 41.67%
5    24aa, >antimicrobial... at 45.83%
6    13aa, >antimicrobial... at 46.15%
7    13aa, >anti-Gram+;Antibact... at 46.15%
8    13aa, >antimicrobial... at 46.15%
9    27aa, >Antibacterial;Antif... at 40.74%
10   19aa, >anti-Gram+;Antibact... *
11   25aa, >anti-Gram+;anti-HIV... at 35.00%
12   25aa, >Antibacterial;antim... at 35.00%
13   26aa, >Antibacterial;antim... at 42.31%
14   21aa, >antibacterial;antim... *
15   28aa, >Antimicrobial... at 50.00%
16   31aa, >antibacterial;antif... at 41.94%
17   25aa, >anti-Gram+;Antibact... at 35.00%
18   26aa, >antibacterial;Antif... at 46.15%
19   27aa, >antibacterial;antim... at 44.44%
```

20 25aa, >anti-Gram-;antibact... at 35.00%  
21 20aa, >antibacterial;Antif... at 35.00%  
22 25aa, >antibacterial;antim... at 35.00%  
23 20aa, >Antimicrobial... at 45.00%  
24 22aa, >antibacterial06968... at 40.91%  
25 18aa, >antibacterial08658... at 44.44%  
26 24aa, >antibacterial08817... at 41.67%  
27 26aa, >antibacterial09205... at 32.31%  
28 26aa, >antibacterial09207... at 32.31%  
29 27aa, >antibacterial09208... at 32.31%  
30 12aa, >antibacterial09245... at 41.67%  
31 18aa, >antibacterial09726... at 44.44%  
32 11aa, >antibacterial09824... at 45.45%  
33 20aa, >antibacterial09995... at 35.00%  
34 14aa, >antibacterial10555... at 42.86%  
35 14aa, >antibacterial10556... at 42.86%  
36 30aa, >antibacterial11836... at 35.00%

>Cluster 93

0 11aa, >Anti-Gram-... \*  
1 37aa, >Antibacterial... at 40.54%  
2 17aa, >Antibacterial;Antif... at 41.18%  
3 18aa, >antibacterial;Antif... at 44.44%  
4 21aa, >antimicrobial... at 42.86%  
5 21aa, >antimicrobial... at 42.86%  
6 18aa, >antibacterial;Antif... at 44.44%  
7 22aa, >anti-Gram-;antifung... at 45.45%  
8 252aa, >Antimicrobial... \*  
9 40aa, >Antibacterial;antim... at 85.00%  
10 94aa, >anti-Gram+;Antibact... \*  
11 18aa, >antibacterial;antif... at 44.44%  
12 18aa, >anti-Gram+;Gram-... at 44.44%  
13 32aa, >Anti-Gram-... at 40.62%  
14 22aa, >antibacterial06560... at 40.91%  
15 18aa, >antibacterial06567... at 44.44%  
16 14aa, >antibacterial06610... at 50.00%  
17 18aa, >antibacterial06971... at 44.44%  
18 15aa, >antibacterial06997... at 35.00%  
19 12aa, >antibacterial07001... at 41.67%  
20 15aa, >antibacterial07008... at 35.00%  
21 12aa, >antibacterial07053... at 41.67%  
22 15aa, >antibacterial07403... at 35.00%  
23 18aa, >antibacterial07440... at 44.44%  
24 18aa, >antibacterial07816... at 44.44%  
25 12aa, >antibacterial08508... at 41.67%  
26 20aa, >antibacterial08630... at 50.00%  
27 18aa, >antibacterial09203... at 50.00%  
28 13aa, >antibacterial09215... at 46.15%  
29 13aa, >antibacterial09217... at 46.15%  
30 26aa, >antibacterial09318... at 46.15%  
31 18aa, >antibacterial09329... at 50.00%  
32 13aa, >antibacterial09587... at 46.15%  
33 13aa, >antibacterial09598... at 46.15%  
34 13aa, >antibacterial09807... at 53.85%  
35 13aa, >antibacterial09808... at 46.15%

36 13aa, >antibacterial09809... at 46.15%  
37 13aa, >antibacterial09842... at 46.15%  
38 18aa, >antibacterial09874... at 50.00%  
39 13aa, >antibacterial09882... \*  
40 18aa, >antibacterial09942... at 50.00%  
41 12aa, >antibacterial10245... at 48.33%  
42 14aa, >antibacterial10897... at 42.86%  
43 12aa, >antibacterial11428... at 41.67%  
44 13aa, >antibacterial11746... at 46.15%  
45 18aa, >antibacterial11773... at 44.44%  
46 13aa, >antibacterial12037... \*  
47 13aa, >antibacterial12038... at 53.85%  
48 13aa, >antibacterial12051... at 46.15%  
49 13aa, >antibacterial12054... at 46.15%  
50 13aa, >antibacterial12062... \*  
51 13aa, >antibacterial12063... at 46.15%  
52 13aa, >antibacterial12395... at 46.15%  
53 18aa, >antibacterial12650... at 44.44%  
54 28aa, >antibacterial12756... at 42.86%  
55 13aa, >antibacterial13327... at 46.15%

>Cluster 94

0 22aa, >Antifungal... at 45.45%  
1 251aa, >Antimicrobial... \*  
2 18aa, >antimicrobial... at 50.00%  
3 18aa, >antibacterial10056... at 44.44%  
4 18aa, >antibacterial10965... at 44.44%  
5 16aa, >antibacterial11114... at 43.75%  
6 13aa, >antibacterial12146... at 36.15%  
7 12aa, >antibacterial12332... at 46.15%  
8 12aa, >antibacterial12881... at 41.67%

>Cluster 95

0 249aa, >Antibacterial;Antif... \*  
1 43aa, >antimicrobial... at 41.86%  
2 26aa, >antimicrobial... at 50.00%  
3 13aa, >antimicrobial... \*  
4 17aa, >antimicrobial... at 47.06%  
5 23aa, >anti-Gram+;antimicr... at 43.48%  
6 27aa, >antimicrobial... at 40.74%  
7 14aa, >Antimicrobial... at 42.86%  
8 13aa, >antibacterial06525... at 46.15%  
9 18aa, >antibacterial08104... at 44.44%  
10 11aa, >antibacterial09339... at 54.55%  
11 13aa, >antibacterial09579... at 46.15%  
12 18aa, >antibacterial09751... at 44.44%  
13 18aa, >antibacterial10127... at 44.44%  
14 22aa, >antibacterial10670... at 40.91%  
15 19aa, >antibacterial10904... at 42.11%  
16 26aa, >antibacterial11361... at 42.31%  
17 15aa, >antibacterial11420... at 35.00%  
18 14aa, >antibacterial11539... at 42.86%  
19 14aa, >antibacterial11619... at 50.00%  
20 13aa, >antibacterial11724... at 46.15%  
21 20aa, >antibacterial11756... at 35.00%  
22 14aa, >antibacterial12000... at 42.86%

```

23 12aa, >antibacterial12466... at 41.67%
24 18aa, >antibacterial12627... *
25 29aa, >antibacterial12757... at 44.83%
26 20aa, >antibacterial12933... at 35.00%
27 14aa, >antibacterial13125... at 42.86%
28 15aa, >antibacterial13184... at 35.00%
29 14aa, >antibacterial13372... at 42.86%
>Cluster 96
0 249aa, >Antifungal... *
1 22aa, >Antimicrobial... at 40.91%
2 24aa, >antibacterial;Antif... at 41.67%
3 13aa, >anti-Gram+;antibact... at 46.15%
4 26aa, >antibacterial07783... at 42.31%
5 20aa, >antibacterial09093... at 35.00%
6 20aa, >antibacterial09096... at 35.00%
7 14aa, >antibacterial09896... at 42.86%
8 13aa, >antibacterial10088... *
9 12aa, >antibacterial10134... at 41.67%
10 35aa, >antibacterial11309... at 45.71%
11 23aa, >antibacterial11848... at 43.48%
12 29aa, >antibacterial12508... at 41.38%
13 24aa, >antibacterial12513... at 41.67%
14 14aa, >antibacterial12528... at 42.86%
15 17aa, >antibacterial13050... at 41.18%
>Cluster 97
0 30aa, >anti-Gram+;antibact... at 35.00%
1 29aa, >Antimicrobial... at 41.38%
2 248aa, >Antimicrobial... *
3 234aa, >Antimicrobial... at 41.03%
4 234aa, >Antimicrobial... at 42.31%
5 33aa, >antimicrobial... at 45.45%
6 17aa, >antibacterial06566... at 47.06%
7 18aa, >antibacterial07922... *
8 24aa, >antibacterial10047... at 41.67%
9 19aa, >antibacterial11389... at 42.11%
10 24aa, >antibacterial11643... at 41.67%
>Cluster 98
0 21aa, >Antimicrobial... at 42.86%
1 23aa, >antimicrobial... *
2 13aa, >anti-Gram+;antibact... at 53.85%
3 24aa, >antimicrobial... at 41.67%
4 13aa, >anti-Gram+;antibact... at 46.15%
5 43aa, >Antimicrobial... at 55.81%
6 42aa, >anti-Gram+;Antibact... *
7 13aa, >antifungal... at 46.15%
8 22aa, >anti-Gram-;antibact... at 40.91%
9 248aa, >Antimicrobial... *
10 65aa, >Antimicrobial... at 41.54%
11 14aa, >antimicrobial... at 42.86%
12 39aa, >Antimicrobial... at 48.72%
13 33aa, >antimicrobial... at 45.45%
14 13aa, >antibacterial06606... at 46.15%
15 21aa, >antibacterial07397... at 42.86%
16 14aa, >antibacterial07404... at 42.86%

```

```

17 25aa, >antibacterial08085... at 35.00%
18 11aa, >antibacterial08289... at 63.64%
19 11aa, >antibacterial08299... at 45.45%
20 12aa, >antibacterial08374... at 41.67%
21 16aa, >antibacterial08538... at 43.75%
22 13aa, >antibacterial08903... at 46.15%
23 15aa, >antibacterial09278... at 46.67%
24 18aa, >antibacterial10111... at 44.44%
25 11aa, >antibacterial10559... at 54.55%
26 22aa, >antibacterial10720... at 50.00%
27 17aa, >antibacterial10909... at 41.18%
28 21aa, >antibacterial11129... at 42.86%
29 13aa, >antibacterial12066... at 46.15%
30 15aa, >antibacterial12116... at 53.33%
>Cluster 99
0 21aa, >antimicrobial... at 42.86%
1 22aa, >anti-Gram+;Gram-... at 40.91%
2 27aa, >antibacterial;antim... at 40.74%
3 25aa, >antibacterial... at 35.00%
4 245aa, >Antibacterial... *
5 245aa, >Antibacterial... at 77.96%
6 244aa, >Antibacterial... at 77.84%
7 246aa, >Antibacterial... at 76.14%
8 244aa, >Antibacterial... at 77.46%
9 246aa, >Antibacterial... *
10 246aa, >Antibacterial... at 84.08%
11 20aa, >antimicrobial... at 45.00%
12 16aa, >antimicrobial... at 43.75%
13 18aa, >anti-Gram-;antibact... at 44.44%
14 14aa, >antibacterial;antim... at 42.86%
15 19aa, >antibacterial08528... at 42.11%
16 21aa, >antibacterial08625... at 42.86%
17 14aa, >antibacterial10202... at 42.86%
18 13aa, >antibacterial12224... at 46.15%
19 13aa, >antibacterial12247... *
20 13aa, >antibacterial12320... at 53.85%
21 28aa, >antibacterial12776... at 42.86%
>Cluster 100
0 21aa, >antimicrobial... at 42.86%
1 18aa, >antimicrobial... at 44.44%
2 245aa, >Antibacterial... *
3 245aa, >Antibacterial... at 78.37%
4 17aa, >antimicrobial... at 41.18%
5 26aa, >antibacterial06645... at 42.31%
6 42aa, >antibacterial07506... at 40.48%
7 21aa, >antibacterial08917... at 42.86%
8 13aa, >antibacterial09810... at 46.15%
9 16aa, >antibacterial10765... at 43.75%
10 16aa, >antibacterial10875... at 50.00%
11 21aa, >antibacterial10949... at 42.86%
12 13aa, >antibacterial11372... *
13 20aa, >antibacterial12099... at 50.00%
14 11aa, >antibacterial12871... at 45.45%
15 18aa, >antibacterial12904... at 44.44%

```



```

16    12aa, >antibacterial113151... at 50.00%
17    20aa, >antibacterial113419... at 35.00%
>Cluster 101
0     20aa, >antimicrobial... at 35.00%
1     21aa, >anti-Gram+;antifung... at 47.62%
2     21aa, >antimicrobial... at 42.86%
3     20aa, >antimicrobial... at 45.00%
4     25aa, >Antibacterial... at 35.00%
5     244aa, >Antimicrobial... *
6     36aa, >anti-Gram+;Antimicr... at 44.44%
7     13aa, >Antibacterial... *
8     13aa, >Antibacterial... at 53.85%
9     40aa, >antibacterial... at 45.00%
10    22aa, >anti-Gram+;antibact... at 40.91%
11    16aa, >anti-Gram+;Antibact... at 50.00%
12    20aa, >antibacterial07084... at 35.00%
13    21aa, >antibacterial07395... at 42.86%
14    27aa, >antibacterial08345... at 40.74%
15    34aa, >antibacterial08560... at 41.18%
16    23aa, >antibacterial09905... at 47.83%
17    28aa, >antibacterial10042... at 50.00%
18    24aa, >antibacterial10046... at 41.67%
19    18aa, >antibacterial10229... *
20    26aa, >antibacterial10649... at 42.31%
21    18aa, >antibacterial10669... at 44.44%
22    13aa, >antibacterial112049... at 46.15%
23    13aa, >antibacterial112059... at 46.15%
24    29aa, >antibacterial112763... at 41.38%
25    22aa, >antibacterial112851... at 45.45%
>Cluster 102
0     17aa, >antimicrobial... at 41.18%
1     19aa, >antibacterial... at 42.11%
2     30aa, >antimicrobial... at 35.00%
3     241aa, >Antimicrobial... *
4     24aa, >Anti-Gram-;antibact... at 41.67%
5     30aa, >antimicrobial;antiv... at 35.00%
6     16aa, >antimicrobial... at 43.75%
7     18aa, >antibacterial06547... at 50.00%
8     14aa, >antibacterial06609... at 42.86%
9     18aa, >antibacterial06970... at 44.44%
10    18aa, >antibacterial06973... at 50.00%
11    18aa, >antibacterial06974... at 44.44%
12    14aa, >antibacterial08473... at 42.86%
13    29aa, >antibacterial09129... at 41.38%
14    14aa, >antibacterial09261... at 42.86%
15    18aa, >antibacterial09901... *
16    26aa, >antibacterial09967... at 42.31%
17    12aa, >antibacterial09976... at 41.67%
18    16aa, >antibacterial10273... at 43.75%
19    12aa, >antibacterial10488... at 41.67%
20    13aa, >antibacterial112200... at 46.15%
21    18aa, >antibacterial113008... at 55.56%
22    15aa, >antibacterial113357... at 35.00%
>Cluster 103

```

0 29aa, >Antibacterial;antim... at 41.38%  
1 67aa, >Antifungal;Antimicr... at 44.78%  
2 119aa, >Antibacterial... at 40.34%  
3 119aa, >Antibacterial... at 42.02%  
4 241aa, >Antibacterial... \*  
5 15aa, >antibacterial13205... at 35.00%

>Cluster 104

0 21aa, >antibacterial;Antif... at 42.86%  
1 11aa, >antimicrobial... at 45.45%  
2 235aa, >Antibacterial... \*  
3 19aa, >anti-Gram+;antibact... at 42.11%  
4 12aa, >Antimicrobial... \*  
5 16aa, >antimicrobial... at 43.75%  
6 13aa, >Antibacterial... at 46.15%  
7 25aa, >antibacterial07277... at 44.00%  
8 19aa, >antibacterial07333... at 42.11%  
9 20aa, >antibacterial07358... at 45.00%  
10 21aa, >antibacterial07392... at 42.86%  
11 21aa, >antibacterial07394... at 42.86%  
12 21aa, >antibacterial07599... at 42.86%  
13 26aa, >antibacterial07805... at 42.31%  
14 18aa, >antibacterial07809... \*  
15 20aa, >antibacterial08584... at 35.00%  
16 21aa, >antibacterial09297... at 42.86%  
17 14aa, >antibacterial09831... at 42.86%  
18 21aa, >antibacterial10085... at 42.86%  
19 21aa, >antibacterial10285... at 42.86%  
20 11aa, >antibacterial10675... at 45.45%  
21 18aa, >antibacterial10702... at 44.44%  
22 29aa, >antibacterial11395... at 41.38%  
23 27aa, >antibacterial11775... at 40.74%  
24 15aa, >antibacterial12007... at 35.00%  
25 13aa, >antibacterial12415... at 46.15%  
26 15aa, >antibacterial12498... at 35.00%  
27 15aa, >antibacterial12579... at 46.67%  
28 15aa, >antibacterial12683... at 35.00%

>Cluster 105

0 13aa, >Anti-Gram-... \*  
1 26aa, >Antibacterial... at 42.31%  
2 24aa, >antibacterial;antim... at 41.67%  
3 11aa, >Antimicrobial... at 45.45%  
4 233aa, >Antimicrobial... \*  
5 12aa, >antibacterial06669... at 41.67%  
6 13aa, >antibacterial07002... at 46.15%  
7 17aa, >antibacterial07554... at 41.18%  
8 13aa, >antibacterial07568... at 46.15%  
9 21aa, >antibacterial07600... at 42.86%  
10 20aa, >antibacterial07755... at 55.00%  
11 20aa, >antibacterial07848... at 55.00%  
12 11aa, >antibacterial07875... at 54.55%  
13 14aa, >antibacterial07912... at 42.86%  
14 21aa, >antibacterial07945... at 42.86%  
15 20aa, >antibacterial08054... at 35.00%  
16 11aa, >antibacterial08521... at 45.45%

```

17 20aa, >antibacterial08849... at 35.00%
18 12aa, >antibacterial08992... at 41.67%
19 11aa, >antibacterial09189... at 45.45%
20 14aa, >antibacterial09490... at 42.86%
21 19aa, >antibacterial09492... at 42.11%
22 16aa, >antibacterial10122... at 43.75%
23 14aa, >antibacterial10123... at 50.00%
24 18aa, >antibacterial10125... at 44.44%
25 15aa, >antibacterial10149... at 35.00%
26 15aa, >antibacterial10173... at 35.00%
27 18aa, >antibacterial10330... *
28 11aa, >antibacterial10565... at 45.45%
29 18aa, >antibacterial10657... at 44.44%
30 18aa, >antibacterial10730... at 44.44%
31 18aa, >antibacterial11110... at 44.44%
32 15aa, >antibacterial111470... at 46.67%
33 37aa, >antibacterial11851... at 43.24%
34 13aa, >antibacterial12319... at 53.85%
35 12aa, >antibacterial12891... at 41.67%
36 16aa, >antibacterial12993... at 43.75%
37 21aa, >antibacterial13127... at 42.86%
38 12aa, >antibacterial13329... at 50.00%
>Cluster 106
0 231aa, >Antibacterial... *
1 27aa, >antibacterial;antim... at 40.74%
2 24aa, >anti-Gram+;antibact... at 45.83%
3 29aa, >antibacterial;antim... at 44.83%
4 13aa, >antibacterial07771... at 46.15%
5 14aa, >antibacterial10089... at 42.86%
6 30aa, >antibacterial10265... at 35.00%
7 36aa, >antibacterial12104... at 41.67%
>Cluster 107
0 67aa, >Antimicrobial... at 71.64%
1 67aa, >Antimicrobial... *
2 65aa, >Antimicrobial... at 53.85%
3 59aa, >Antimicrobial... at 62.71%
4 66aa, >Antimicrobial... at 57.27%
5 163aa, >Antimicrobial... at 45.40%
6 133aa, >Antimicrobial... at 61.65%
7 155aa, >Antimicrobial... at 67.74%
8 168aa, >Antimicrobial... at 54.76%
9 224aa, >Antimicrobial... at 47.32%
10 224aa, >Antimicrobial... at 64.29%
11 182aa, >Antimicrobial... at 67.03%
12 148aa, >Antimicrobial... at 79.73%
13 144aa, >Antimicrobial... at 77.78%
14 168aa, >Antimicrobial... at 66.07%
15 159aa, >Antimicrobial... at 68.55%
16 155aa, >Antimicrobial... at 74.19%
17 162aa, >Antimicrobial... at 77.78%
18 173aa, >Antimicrobial... at 63.58%
19 164aa, >Antimicrobial... at 64.63%
20 190aa, >Antimicrobial... at 70.53%
21 190aa, >Antimicrobial... at 71.58%

```

22 158aa, >Antimicrobial... at 67.72%  
23 125aa, >Antimicrobial... \*  
24 158aa, >Antimicrobial... at 70.89%  
25 159aa, >Antimicrobial... at 69.18%  
26 174aa, >Antimicrobial... at 57.47%  
27 185aa, >Antimicrobial... at 54.59%  
28 159aa, >Antimicrobial... at 67.92%  
29 229aa, >Antimicrobial... \*  
30 174aa, >Antimicrobial... \*  
31 135aa, >Antimicrobial... \*  
32 144aa, >Antimicrobial... at 79.86%  
33 144aa, >Antimicrobial... at 79.86%  
34 157aa, >Antimicrobial... at 64.33%  
35 155aa, >Antimicrobial... at 66.45%  
36 170aa, >Antimicrobial... at 52.94%  
37 176aa, >Antimicrobial... at 52.27%  
38 173aa, >Antimicrobial... at 53.76%  
39 173aa, >Antimicrobial... at 53.18%  
40 172aa, >Antimicrobial... at 52.33%  
41 173aa, >Antimicrobial... at 53.18%  
42 175aa, >Antimicrobial... at 43.43%  
43 174aa, >Antimicrobial... at 45.40%  
44 175aa, >Antimicrobial... at 45.71%  
45 172aa, >Antimicrobial... at 47.67%  
46 171aa, >Antimicrobial... at 54.97%  
47 35aa, >anti-Gram+;antifung... at 35.00%  
48 76aa, >Antimicrobial... at 51.32%  
49 43aa, >antibacterial;antim... \*  
50 46aa, >Antibacterial... at 67.39%  
51 99aa, >Antibacterial... at 44.44%  
52 67aa, >Antimicrobial... at 71.64%  
53 30aa, >Antimicrobial... at 35.00%  
54 19aa, >antibacterial06498... at 42.11%  
55 13aa, >antibacterial06612... at 46.15%  
56 96aa, >antibacterial07311... \*  
57 22aa, >antibacterial07318... at 50.00%  
58 23aa, >antibacterial07319... at 43.48%  
59 43aa, >antibacterial07347... at 76.74%  
60 60aa, >antibacterial07399... at 35.00%  
61 30aa, >antibacterial07516... at 53.33%  
62 30aa, >antibacterial07587... at 53.33%  
63 17aa, >antibacterial07701... at 41.18%  
64 14aa, >antibacterial07989... at 50.00%  
65 17aa, >antibacterial08447... at 41.18%  
66 32aa, >antibacterial08569... at 65.62%  
67 32aa, >antibacterial08573... at 65.62%  
68 32aa, >antibacterial08574... at 40.62%  
69 11aa, >antibacterial09178... at 45.45%  
70 26aa, >antibacterial10105... at 42.31%  
71 13aa, >antibacterial10628... at 46.15%  
72 12aa, >antibacterial10695... at 50.00%  
73 99aa, >antibacterial11116... \*  
74 13aa, >antibacterial112065... at 46.15%  
75 13aa, >antibacterial112156... at 46.15%

```

76    19aa, >antibacterial12629... at 42.11%
>Cluster 108
0     17aa, >anti-Gram+;Antibact... *
1     17aa, >antimicrobial... at 41.18%
2     24aa, >antimicrobial... at 41.67%
3     40aa, >Antimicrobial... at 42.50%
4     29aa, >antimicrobial... at 41.38%
5     227aa, >Antimicrobial... *
6     24aa, >antimicrobial... at 45.83%
7     24aa, >antimicrobial... at 41.67%
8     16aa, >antimicrobial... at 43.75%
9     16aa, >antimicrobial... at 43.75%
10    15aa, >antimicrobial... at 35.00%
11    24aa, >antibacterial08276... at 41.67%
12    18aa, >antibacterial08344... at 44.44%
13    16aa, >antibacterial08489... at 43.75%
14    17aa, >antibacterial09171... at 41.18%
15    25aa, >antibacterial09688... at 35.00%
16    22aa, >antibacterial10063... at 40.91%
17    19aa, >antibacterial10091... at 47.37%
18    26aa, >antibacterial10342... at 42.31%
19    25aa, >antibacterial11717... at 35.00%
20    13aa, >antibacterial11742... *
21    26aa, >antibacterial12168... at 42.31%
22    14aa, >antibacterial12392... at 42.86%
>Cluster 109
0     36aa, >antibacterial;antim... at 44.44%
1     25aa, >anti-Gram+;antibact... at 35.00%
2     26aa, >Antimicrobial... *
3     24aa, >antibacterial;antim... at 41.67%
4     226aa, >Antimicrobial... *
5     20aa, >antimicrobial... at 35.00%
6     15aa, >antibacterial... at 35.00%
7     32aa, >Antimicrobial... at 43.75%
8     24aa, >anti-Gram+;antibact... *
9     20aa, >antibacterial06981... at 45.00%
10    11aa, >antibacterial07373... at 45.45%
11    29aa, >antibacterial07457... at 41.38%
12    13aa, >antibacterial07803... at 53.85%
13    20aa, >antibacterial07940... at 45.00%
14    24aa, >antibacterial08132... at 41.67%
15    22aa, >antibacterial08275... at 40.91%
16    24aa, >antibacterial08281... at 41.67%
17    26aa, >antibacterial08600... at 42.31%
18    17aa, >antibacterial08623... at 41.18%
19    19aa, >antibacterial08670... at 47.37%
20    26aa, >antibacterial09056... at 50.00%
21    18aa, >antibacterial09619... at 44.44%
22    15aa, >antibacterial10152... at 35.00%
23    26aa, >antibacterial10336... at 46.15%
24    26aa, >antibacterial10337... at 42.31%
25    20aa, >antibacterial12788... at 35.00%
>Cluster 110
0     33aa, >antimicrobial... at 42.42%

```

```
1 33aa, >antimicrobial... at 45.45%
2 21aa, >antimicrobial... at 47.62%
3 225aa, >Antimicrobial... *
4 28aa, >antibacterial07688... *
5 28aa, >antibacterial07691... at 46.43%
6 28aa, >antibacterial07692... at 46.43%
7 35aa, >antibacterial10886... at 45.71%
8 18aa, >antibacterial12068... at 44.44%
9 20aa, >antibacterial12658... at 50.00%
```

>Cluster 111

```
0 32aa, >anti-Gram+;antibact... at 40.62%
1 48aa, >Antimicrobial... *
2 46aa, >Antimicrobial... at 71.74%
3 42aa, >Antimicrobial... at 80.95%
4 40aa, >Antimicrobial... *
5 48aa, >Antimicrobial... at 79.17%
6 223aa, >Antimicrobial... *
7 49aa, >Antimicrobial... at 79.59%
8 46aa, >Antimicrobial... at 49.57%
9 49aa, >Antibacterial... at 69.39%
10 49aa, >Antimicrobial... at 55.51%
11 49aa, >Antibacterial;Antim... at 57.35%
12 49aa, >Antimicrobial... at 63.47%
13 15aa, >antimicrobial... at 35.00%
14 24aa, >antifungal;antimicr... at 41.67%
15 52aa, >Antimicrobial... at 78.85%
16 43aa, >Antimicrobial... at 81.40%
17 52aa, >Antimicrobial... at 65.38%
18 52aa, >Antimicrobial... at 67.31%
19 68aa, >Antimicrobial... at 50.00%
20 18aa, >antibacterial;Antif... *
21 18aa, >antibacterial06548... at 50.00%
22 18aa, >antibacterial07807... at 44.44%
23 12aa, >antibacterial08376... at 41.67%
24 12aa, >antibacterial08430... at 50.00%
25 11aa, >antibacterial10321... at 45.45%
26 20aa, >antibacterial11996... at 35.00%
27 13aa, >antibacterial12044... at 46.15%
```

>Cluster 112

```
0 30aa, >antiviral... at 43.33%
1 21aa, >antimicrobial... at 52.38%
2 21aa, >anti-Gram+;Antibact... at 42.86%
3 222aa, >Antibacterial... *
4 219aa, >Antibacterial... at 68.95%
5 30aa, >Antifungal... at 35.00%
6 18aa, >antibacterial;antif... at 44.44%
7 18aa, >antibacterial;Antif... at 44.44%
8 20aa, >antibacterial;antim... at 35.00%
9 15aa, >antimicrobial... at 35.00%
10 16aa, >antimicrobial... at 43.75%
11 25aa, >antibacterial07276... *
12 18aa, >antibacterial07337... at 50.00%
13 18aa, >antibacterial07348... at 44.44%
14 11aa, >antibacterial08831... at 45.45%
```

15 19aa, >antibacterial09145... at 42.11%  
16 30aa, >antibacterial11394... at 43.33%  
17 25aa, >antibacterial11434... at 35.00%  
18 18aa, >antibacterial11762... at 44.44%  
19 23aa, >antibacterial11933... at 43.48%  
20 11aa, >antibacterial13365... at 45.45%

>Cluster 113

0 19aa, >antimicrobial... at 42.11%  
1 14aa, >anti-Gram+;antibact... \*  
2 30aa, >antibacterial;Antif... at 43.33%  
3 29aa, >antimicrobial... at 41.38%  
4 21aa, >antimicrobial... at 42.86%  
5 189aa, >Antimicrobial... at 43.92%  
6 208aa, >Antimicrobial... at 64.90%  
7 202aa, >Antimicrobial... at 69.31%  
8 159aa, >Antimicrobial... at 59.12%  
9 207aa, >Antimicrobial... at 82.13%  
10 198aa, >Antimicrobial... \*  
11 216aa, >Antimicrobial... at 82.41%  
12 183aa, >Antimicrobial... at 83.06%  
13 207aa, >Antimicrobial... at 77.29%  
14 54aa, >Antimicrobial... at 42.59%  
15 187aa, >Antimicrobial... at 73.80%  
16 222aa, >Antimicrobial... \*  
17 40aa, >Antifungal;Gram-... at 42.50%  
18 37aa, >anti-Gram+;antibact... at 45.95%  
19 164aa, >Antimicrobial... at 70.12%  
20 22aa, >antimicrobial... at 40.91%  
21 48aa, >antibacterial07325... at 41.67%  
22 16aa, >L02A001748... at 43.75%  
23 25aa, >antibacterial08208... at 35.00%  
24 14aa, >antibacterial09669... at 42.86%  
25 16aa, >antibacterial09924... at 43.75%  
26 58aa, >antibacterial10837... at 51.72%  
27 18aa, >antibacterial10964... at 44.44%  
28 20aa, >antibacterial11319... at 35.00%  
29 25aa, >antibacterial11729... at 35.00%  
30 16aa, >antibacterial13280... \*

>Cluster 114

0 20aa, >antimicrobial... at 35.00%  
1 222aa, >Antifungal... \*  
2 16aa, >antibacterial08457... at 43.75%  
3 20aa, >antibacterial11432... at 50.00%  
4 22aa, >antibacterial12575... at 45.45%

>Cluster 115

0 19aa, >anti-Gram+;Antibact... at 42.11%  
1 30aa, >antimicrobial... at 35.00%  
2 221aa, >Antibacterial... \*  
3 14aa, >antibacterial;antim... at 42.86%  
4 12aa, >antibacterial09255... at 41.67%  
5 12aa, >antibacterial09256... at 41.67%  
6 13aa, >antibacterial10426... at 46.15%  
7 12aa, >antibacterial12372... at 50.00%  
8 18aa, >antibacterial12443... \*

```

9      12aa, >antibacterial12570... at 41.67%
10     15aa, >antibacterial13193... at 35.00%
>Cluster 116
0      27aa, >antimicrobial... at 40.74%
1      20aa, >Antifungal;antimicr... at 35.00%
2      30aa, >anti-Gram+;antifung... at 35.00%
3      17aa, >anti-Gram+;antibact... at 41.18%
4      20aa, >Antibacterial... at 35.00%
5      220aa, >Antimicrobial... *
6      18aa, >Antimicrobial... at 44.44%
7      24aa, >antibacterial06590... at 45.83%
8      29aa, >antibacterial07680... at 41.38%
9      16aa, >antibacterial08359... at 50.00%
10     27aa, >antibacterial08914... at 40.74%
11     21aa, >antibacterial09317... at 47.62%
12     21aa, >antibacterial10327... at 42.86%
13     30aa, >antibacterial10481... at 35.00%
14     33aa, >antibacterial10569... at 45.45%
15     14aa, >antibacterial10794... at 50.00%
16     17aa, >antibacterial11733... at 52.94%
17     14aa, >antibacterial12086... at 50.00%
18     18aa, >antibacterial12160... at 44.44%
19     15aa, >antibacterial12662... at 35.00%
20     20aa, >antibacterial13311... at 35.00%
>Cluster 117
0      28aa, >Antimicrobial... at 42.86%
1      13aa, >antimicrobial... at 46.15%
2      27aa, >antimicrobial... at 44.44%
3      215aa, >Antibacterial... *
4      215aa, >Antibacterial... at 67.44%
5      28aa, >antibacterial06794... at 42.86%
6      19aa, >antibacterial08386... at 42.11%
7      16aa, >antibacterial08488... at 50.00%
8      20aa, >antibacterial09452... at 35.00%
9      19aa, >antibacterial09645... at 42.11%
10     20aa, >antibacterial10032... at 35.00%
11     19aa, >antibacterial12164... at 42.11%
12     26aa, >antibacterial12750... at 42.31%
>Cluster 118
0      16aa, >antimicrobial... at 56.25%
1      23aa, >anti-Gram+;antibact... at 43.48%
2      28aa, >Antibacterial;antim... at 46.43%
3      213aa, >Antimicrobial... *
4      25aa, >antibacterial;antim... at 35.00%
5      27aa, >antibacterial07652... at 40.74%
6      18aa, >antibacterial09227... at 44.44%
7      27aa, >antibacterial09945... at 40.74%
8      23aa, >antibacterial10051... at 43.48%
9      31aa, >antibacterial10608... at 41.94%
10     25aa, >antibacterial11545... at 35.00%
11     30aa, >antibacterial11562... at 35.00%
>Cluster 119
0      22aa, >Antibacterial... at 40.91%
1      11aa, >anti-Gram+;Antimicr... at 35.45%

```



```

2    18aa, >antimicrobial... at 34.44%
3    19aa, >antibacterial... at 42.11%
4    13aa, >Antimicrobial... at 36.15%
5    29aa, >Gram-... at 41.38%
6    32aa, >Antimicrobial... *
7    156aa, >Antimicrobial... at 50.00%
8    147aa, >Antimicrobial... at 40.14%
9    154aa, >Antimicrobial... at 62.99%
10   154aa, >Antimicrobial... *
11   213aa, >Antimicrobial... *
12   148aa, >Antimicrobial... at 41.22%
13   23aa, >antibacterial;antim... at 47.83%
14   24aa, >anti-Gram+;antibact... at 41.67%
15   33aa, >Antifungal;Gram-... at 42.42%
16   12aa, >antibacterial06614... at 41.67%
17   14aa, >antibacterial06618... at 42.86%
18   12aa, >antibacterial07022... at 50.00%
19   15aa, >antibacterial07025... at 35.00%
20   15aa, >antibacterial07718... at 35.00%
21   15aa, >antibacterial07721... at 35.00%
22   13aa, >antibacterial09597... at 46.15%
23   14aa, >antibacterial10577... at 50.00%
24   18aa, >antibacterial10963... at 50.00%
25   31aa, >antibacterial11351... at 41.94%
26   16aa, >antibacterial11634... at 43.75%
27   20aa, >antibacterial11830... at 35.00%

```

>Cluster 120

```

0    162aa, >Antimicrobial... *
1    13aa, >Antibacterial;antim... at 46.15%
2    13aa, >Antibacterial... at 46.15%
3    209aa, >Antimicrobial... at 77.51%
4    209aa, >Antimicrobial... at 83.25%
5    211aa, >Antimicrobial... *
6    208aa, >Antimicrobial... at 78.37%
7    20aa, >antibacterial08201... at 45.00%
8    17aa, >antibacterial09289... at 41.18%
9    20aa, >antibacterial09399... at 35.00%
10   11aa, >antibacterial10402... at 54.55%
11   20aa, >antibacterial13019... at 45.00%

```

>Cluster 121

```

0    30aa, >Antiviral... at 43.33%
1    30aa, >Antimicrobial... at 63.33%
2    30aa, >antimicrobial... at 56.67%
3    30aa, >antimicrobial... at 56.67%
4    32aa, >antimicrobial... at 40.62%
5    33aa, >antimicrobial... at 42.42%
6    30aa, >Antimicrobial... at 46.67%
7    30aa, >anti-HIV;antiviral... at 46.67%
8    30aa, >anti-HIV;antimicrob... at 43.33%
9    30aa, >antimicrobial... at 53.33%
10   31aa, >Antimicrobial;Antim... at 77.42%
11   29aa, >Antimicrobial;Antim... *
12   29aa, >Antimicrobial;Antim... at 68.97%
13   29aa, >antimicrobial... *

```

14 32aa, >antimicrobial... at 46.88%  
15 30aa, >Antimicrobial... at 43.33%  
16 30aa, >anti-Gram+;antibact... at 43.33%  
17 31aa, >Antimicrobial... at 41.94%  
18 29aa, >antimicrobial;Antim... at 68.97%  
19 29aa, >antimicrobial... at 72.41%  
20 153aa, >Antimicrobial... at 78.43%  
21 155aa, >Antimicrobial... at 80.65%  
22 107aa, >Antimicrobial... at 64.49%  
23 210aa, >Antimicrobial... \*  
24 78aa, >Antimicrobial... at 44.87%  
25 63aa, >Antimicrobial... at 44.44%  
26 153aa, >Antimicrobial... at 46.41%  
27 153aa, >Antimicrobial... at 45.75%  
28 30aa, >Antimicrobial... at 46.67%  
29 106aa, >Antimicrobial... at 64.15%  
30 30aa, >antimicrobial;antiv... at 46.67%  
31 29aa, >Antimicrobial... at 55.17%  
32 28aa, >antibacterial07338... at 42.86%  
33 30aa, >antibacterial07793... at 43.33%  
34 12aa, >antibacterial07837... at 41.67%  
35 32aa, >antibacterial10752... \*  
36 29aa, >antibacterial10754... at 65.52%  
37 32aa, >antibacterial11410... at 43.75%  
38 27aa, >antibacterial11800... at 40.74%  
39 24aa, >antibacterial12622... at 41.67%

>Cluster 122

0 102aa, >Antimicrobial... at 41.18%  
1 93aa, >anti-Gram+;Antibact... at 51.61%  
2 40aa, >antimicrobial... at 35.00%  
3 37aa, >antibacterial;antim... at 45.95%  
4 208aa, >Antimicrobial... \*  
5 136aa, >Antimicrobial... at 45.59%  
6 132aa, >Antimicrobial... at 40.91%  
7 161aa, >Antimicrobial... \*  
8 32aa, >Antimicrobial... at 46.88%  
9 17aa, >antimicrobial... at 41.18%  
10 37aa, >Antimicrobial... at 40.54%  
11 42aa, >antibacterial;antim... at 40.48%  
12 37aa, >antibacterial;antif... at 40.54%  
13 42aa, >antibacterial;antim... at 40.48%  
14 31aa, >Antibacterial;Antif... at 41.94%  
15 17aa, >antibacterial06601... \*  
16 15aa, >antibacterial06611... at 35.00%  
17 26aa, >antibacterial07346... at 42.31%  
18 23aa, >antibacterial08368... at 43.48%  
19 23aa, >antibacterial08375... at 43.48%  
20 22aa, >antibacterial10665... at 50.00%  
21 20aa, >antibacterial10831... at 35.00%

>Cluster 123

0 13aa, >antimicrobial... at 46.15%  
1 208aa, >Antimicrobial... \*  
2 13aa, >antimicrobial... at 46.15%  
3 26aa, >antibacterial07934... at 46.15%

```

4      15aa, >antibacterial08037... at 35.00%
5      26aa, >antibacterial09005... at 53.85%
6      21aa, >antibacterial10052... at 47.62%
7      22aa, >antibacterial10108... at 45.45%
8      30aa, >antibacterial10611... at 35.00%
9      26aa, >antibacterial10616... at 42.31%
>Cluster 124
0      207aa, >Antimicrobial... *
1      24aa, >anti-Gram-;Antibact... at 45.83%
2      20aa, >anti-Gram+;antibact... at 35.00%
3      25aa, >antibacterial;antim... at 44.00%
4      25aa, >antimicrobial... at 35.00%
5      25aa, >Antibacterial;antim... at 44.00%
6      22aa, >antimicrobial... at 40.91%
7      21aa, >anti-Gram+;antimicr... at 42.86%
8      18aa, >Antimicrobial... at 44.44%
9      38aa, >antibacterial07378... at 42.11%
10     20aa, >antibacterial09089... *
11     12aa, >antibacterial09240... at 50.00%
12     20aa, >antibacterial09454... at 35.00%
13     16aa, >antibacterial09496... at 43.75%
14     19aa, >antibacterial10382... at 42.11%
15     20aa, >antibacterial10525... at 35.00%
16     31aa, >antibacterial11712... at 41.94%
17     13aa, >antibacterial11741... at 46.15%
18     17aa, >antibacterial11989... at 41.18%
>Cluster 125
0      207aa, >Antimicrobial... *
1      18aa, >antibacterial06556... at 44.44%
2      14aa, >antibacterial07742... at 42.86%
3      16aa, >antibacterial08468... at 50.00%
4      15aa, >antibacterial113058... at 35.00%
5      13aa, >antibacterial113073... at 46.15%
6      19aa, >antibacterial113137... at 42.11%
>Cluster 126
0      27aa, >anti-Gram-;Antibact... at 40.74%
1      31aa, >anti-Gram-;antibact... at 45.16%
2      17aa, >antimicrobial... at 41.18%
3      20aa, >Antibacterial... at 45.00%
4      15aa, >antimicrobial... at 46.67%
5      180aa, >Antimicrobial... at 44.44%
6      205aa, >Antimicrobial... *
7      175aa, >Antimicrobial... at 48.00%
8      16aa, >antimicrobial... *
9      30aa, >antibacterial06461... at 43.33%
10     29aa, >antibacterial06570... at 41.38%
11     22aa, >antibacterial07034... at 40.91%
12     21aa, >antibacterial08274... at 42.86%
13     11aa, >antibacterial08287... at 45.45%
14     11aa, >antibacterial08426... at 45.45%
15     12aa, >antibacterial08428... at 50.00%
16     17aa, >antibacterial09156... at 41.18%
17     25aa, >antibacterial10373... at 44.00%
18     33aa, >antibacterial11121... at 42.42%

```

```

19    21aa, >antibacterial11282... at 42.86%
20    15aa, >antibacterial11297... at 35.00%
21    27aa, >antibacterial11657... at 44.44%
22    15aa, >antibacterial11789... at 46.67%
23    18aa, >antibacterial13091... at 50.00%
>Cluster 127
0     13aa, >Antifungal;antibact... *
1     29aa, >antimicrobial... at 41.38%
2     29aa, >antimicrobial... at 41.38%
3     25aa, >Antibacterial;antim... at 35.00%
4     24aa, >antimicrobial... at 41.67%
5     17aa, >Antimicrobial... at 41.18%
6     18aa, >antimicrobial... at 44.44%
7     203aa, >Antimicrobial... *
8     17aa, >antibacterial08392... at 41.18%
9     18aa, >antibacterial08851... at 44.44%
10    15aa, >antibacterial09734... at 35.00%
11    13aa, >antibacterial10460... at 46.15%
12    18aa, >antibacterial12539... at 44.44%
13    18aa, >antibacterial12540... at 50.00%
14    15aa, >antibacterial12639... at 35.00%
15    20aa, >antibacterial13152... at 35.00%
16    20aa, >antibacterial13167... at 35.00%
>Cluster 128
0     32aa, >anti-Gram+;Antibact... at 43.75%
1     42aa, >anti-Gram+;antibact... *
2     44aa, >antimicrobial... at 60.45%
3     25aa, >Antibacterial;antim... at 35.00%
4     202aa, >Antimicrobial... *
5     26aa, >anti-Gram+;antibact... at 46.15%
6     19aa, >anti-Gram-;antibact... at 42.11%
7     15aa, >antibacterial07046... at 35.00%
8     26aa, >antibacterial07431... at 42.31%
9     16aa, >antibacterial07521... at 63.75%
10    13aa, >antibacterial07905... at 43.85%
11    24aa, >antibacterial08143... at 41.67%
12    35aa, >antibacterial09472... at 42.86%
13    24aa, >antibacterial10506... at 41.67%
14    24aa, >antibacterial11519... at 41.67%
15    13aa, >antibacterial12053... at 46.15%
>Cluster 129
0     35aa, >anti-Gram+;antibact... at 35.00%
1     27aa, >Antimicrobial... at 40.74%
2     27aa, >Antimicrobial... at 44.44%
3     30aa, >antibacterial;antim... *
4     202aa, >Antimicrobial... *
5     19aa, >antimicrobial... at 42.11%
6     19aa, >antimicrobial... at 42.11%
7     19aa, >antimicrobial... at 42.11%
8     23aa, >antibacterial06961... at 43.48%
9     12aa, >antibacterial06988... at 41.67%
10    13aa, >antibacterial06990... at 46.15%
11    12aa, >antibacterial07016... at 41.67%
12    20aa, >antibacterial07633... at 45.00%

```

```

13 26aa, >antimicrobial... *
14 26aa, >antimicrobial... at 50.00%
15 25aa, >antibacterial07839... at 35.00%
16 23aa, >antibacterial07895... at 43.48%
17 17aa, >antibacterial07907... at 41.18%
18 15aa, >antibacterial08683... at 35.00%
19 15aa, >antibacterial08702... at 35.00%
20 13aa, >antibacterial09583... at 46.15%
21 13aa, >antibacterial09585... at 46.15%
22 26aa, >antibacterial09760... at 42.31%
23 14aa, >antibacterial10199... at 42.86%
24 21aa, >antibacterial11283... at 42.86%
25 14aa, >antibacterial11475... at 42.86%
26 40aa, >antibacterial12110... at 35.00%
27 26aa, >antibacterial12417... at 42.31%
28 26aa, >antibacterial12435... at 42.31%
29 29aa, >antibacterial12732... at 41.38%
30 18aa, >antibacterial13098... at 44.44%
>Cluster 130
0 191aa, >Antimicrobial... at 40.84%
1 193aa, >Antimicrobial... *
2 195aa, >Antimicrobial... at 86.67%
3 195aa, >Antimicrobial... *
4 174aa, >Antimicrobial... at 79.66%
5 202aa, >Antimicrobial... *
6 181aa, >Antimicrobial... at 77.29%
7 198aa, >Antimicrobial... at 69.39%
8 45aa, >antibacterial06635... *
9 25aa, >antibacterial07693... at 35.00%
10 25aa, >antibacterial07702... at 35.00%
11 32aa, >antibacterial08462... at 40.62%
12 15aa, >antibacterial08627... at 35.00%
13 30aa, >antibacterial08720... at 35.00%
14 18aa, >antibacterial09705... at 34.44%
>Cluster 131
0 201aa, >Antimicrobial... *
>Cluster 132
0 16aa, >antimicrobial... at 43.75%
1 200aa, >Antifungal... *
>Cluster 133
0 27aa, >Antifungal;antimicr... at 40.74%
1 199aa, >Antimicrobial... *
2 16aa, >antibacterial07850... at 43.75%
3 13aa, >antibacterial08379... at 46.15%
4 23aa, >antibacterial09941... at 43.48%
5 20aa, >antibacterial10031... at 35.00%
6 14aa, >antibacterial10385... at 42.86%
7 20aa, >antibacterial10498... at 35.00%
8 19aa, >antibacterial12018... at 42.11%
9 14aa, >antibacterial12393... at 42.86%
10 18aa, >antibacterial12613... at 50.00%
>Cluster 134
0 30aa, >antimicrobial... at 43.33%
1 198aa, >Antibacterial... *

```

```

2      15aa, >antibacterial10171... at 35.00%
>Cluster 135
0      23aa, >antimicrobial... at 43.48%
1      21aa, >anti-Gram+;antibact... at 52.38%
2      198aa, >Antimicrobial... *
3      14aa, >anti-Gram+;antibact... at 42.86%
4      12aa, >antibacterial10408... at 50.00%
5      35aa, >antibacterial11368... at 35.00%
6      23aa, >antibacterial12535... at 43.48%
7      15aa, >antibacterial13268... at 35.00%
>Cluster 136
0      25aa, >anti-Gram+;antibact... at 44.00%
1      183aa, >anti-Gram+;Gram-... at 58.47%
2      194aa, >Antibacterial... at 72.68%
3      195aa, >Antimicrobial... *
4      185aa, >Antibacterial... at 52.97%
5      18aa, >antibacterial08057... at 44.44%
6      13aa, >antibacterial10064... at 46.15%
7      30aa, >antibacterial10734... at 35.00%
8      13aa, >antibacterial11744... at 46.15%
9      26aa, >antibacterial12441... at 42.31%
10     20aa, >antibacterial12826... at 35.00%
>Cluster 137
0      19aa, >antifungal;antimicr... *
1      25aa, >antimicrobial... at 35.00%
2      193aa, >Antimicrobial... *
3      24aa, >antibacterial;antif... at 41.67%
4      14aa, >Antibacterial;Antif... at 42.86%
5      22aa, >antibacterial06702... at 45.45%
6      18aa, >antibacterial08093... at 44.44%
7      24aa, >antibacterial08125... at 41.67%
8      24aa, >antibacterial08128... at 41.67%
9      24aa, >antibacterial08141... at 50.00%
10     13aa, >antibacterial08381... at 53.85%
11     23aa, >antibacterial09058... at 43.48%
12     26aa, >antibacterial09794... *
13     26aa, >antibacterial09795... at 42.31%
14     27aa, >antibacterial09797... at 42.31%
15     27aa, >antibacterial09798... at 42.31%
16     28aa, >antibacterial09799... at 42.31%
17     18aa, >antibacterial10126... at 44.44%
18     19aa, >antibacterial10635... at 47.37%
19     30aa, >antibacterial11448... at 35.00%
20     22aa, >antibacterial12590... at 40.91%
21     18aa, >antibacterial12623... at 44.44%
22     13aa, >antibacterial13290... at 46.15%
>Cluster 138
0      30aa, >antibacterial;antif... *
1      20aa, >Antibacterial... at 45.00%
2      115aa, >Antimicrobial... at 45.22%
3      145aa, >Antimicrobial... at 55.86%
4      139aa, >Antimicrobial... at 45.32%
5      193aa, >Antimicrobial... *
6      148aa, >anti-Gram+;Gram-... *

```

```

7      12aa, >antibacterial07959... at 41.67%
8      12aa, >antibacterial08283... at 50.00%
9      12aa, >antibacterial08288... at 50.00%
10     16aa, >antibacterial08324... at 50.00%
11     17aa, >antibacterial08328... at 47.06%
12     18aa, >antibacterial08338... at 34.44%
13     18aa, >antibacterial08703... at 34.44%
14     11aa, >antibacterial09815... at 54.55%
15     11aa, >antibacterial09816... at 45.45%
16     14aa, >antibacterial10775... at 42.86%
17     33aa, >antibacterial11777... at 42.42%
18     13aa, >antibacterial12297... at 46.15%
>Cluster 139
0      191aa, >Antibacterial;Antif... *
1      35aa, >antibacterial;antif... at 35.00%
2      27aa, >Antimicrobial... at 44.44%
3      23aa, >antibacterial08951... at 43.48%
4      20aa, >antibacterial09459... at 35.00%
5      24aa, >antibacterial10107... at 45.83%
6      13aa, >antibacterial10459... at 46.15%
7      13aa, >antibacterial10698... at 46.15%
8      25aa, >antibacterial11196... at 35.00%
9      35aa, >antibacterial11471... at 35.00%
10     34aa, >antibacterial12190... at 44.12%
>Cluster 140
0      29aa, >antimicrobial... at 41.38%
1      41aa, >Antimicrobial... at 43.90%
2      29aa, >Antimicrobial... at 41.38%
3      19aa, >antibacterial;antif... at 42.11%
4      24aa, >anti-Gram+;anti-HIV... at 41.67%
5      50aa, >antiviral... at 35.00%
6      125aa, >Antifungal... *
7      191aa, >Antifungal... *
8      23aa, >antibacterial06586... at 43.48%
9      12aa, >antibacterial07020... at 41.67%
10     29aa, >antibacterial07500... at 44.83%
11     14aa, >antibacterial07822... at 42.86%
12     11aa, >antibacterial10540... at 54.55%
13     18aa, >antibacterial12021... at 50.00%
14     20aa, >antibacterial13124... at 35.00%
15     29aa, >antibacterial13220... at 41.38%
>Cluster 141
0      95aa, >Antimicrobial... at 60.00%
1      188aa, >Antibacterial... *
2      188aa, >Antibacterial... at 84.04%
3      20aa, >antimicrobial... at 45.00%
4      82aa, >Antimicrobial... at 59.76%
5      19aa, >antibacterial06558... at 47.37%
6      13aa, >antibacterial10643... at 46.15%
7      19aa, >antibacterial10684... at 47.37%
8      20aa, >antibacterial13174... at 35.00%
>Cluster 142
0      108aa, >Antimicrobial... at 49.07%
1      38aa, >Antimicrobial... *

```

2 37aa, >Antimicrobial... at 40.54%  
3 14aa, >anti-Gram-;antibact... at 42.86%  
4 18aa, >antibacterial;Antif... at 50.00%  
5 52aa, >Antimicrobial... at 51.92%  
6 39aa, >Antimicrobial... at 51.28%  
7 22aa, >anti-Gram+;antibact... at 40.91%  
8 44aa, >Antimicrobial... at 40.91%  
9 186aa, >Antimicrobial... \*  
10 22aa, >antibacterial;antim... at 40.91%  
11 60aa, >Antimicrobial... at 48.33%  
12 45aa, >Antimicrobial... at 35.00%  
13 18aa, >antibacterial;antif... at 50.00%  
14 18aa, >antibacterial;Antif... at 44.44%  
15 45aa, >Antimicrobial... at 35.00%  
16 15aa, >antibacterial06603... at 35.00%  
17 18aa, >antibacterial07813... at 44.44%  
18 20aa, >antibacterial07944... at 45.00%  
19 16aa, >antibacterial08352... at 43.75%  
20 18aa, >antibacterial09107... \*  
21 18aa, >antibacterial09707... at 44.44%  
22 19aa, >antibacterial10050... at 44.44%  
23 21aa, >antibacterial10287... at 42.86%  
24 14aa, >antibacterial13185... at 50.00%

>Cluster 143

0 23aa, >antimicrobial... at 43.48%  
1 186aa, >Antimicrobial... \*  
2 185aa, >Antimicrobial... at 85.41%  
3 18aa, >antibacterial09898... at 44.44%  
4 20aa, >antibacterial12711... at 45.00%

>Cluster 144

0 24aa, >anti-Gram+;Antibact... at 41.67%  
1 185aa, >Antimicrobial... \*  
2 19aa, >antibacterial06682... at 42.11%  
3 22aa, >antibacterial08441... at 45.45%  
4 19aa, >antibacterial08453... at 52.63%

>Cluster 145

0 25aa, >antimicrobial... at 35.00%  
1 29aa, >anti-Gram+;antibact... at 41.38%  
2 182aa, >Antimicrobial... \*  
3 22aa, >antibacterial06533... at 40.91%  
4 20aa, >antibacterial11784... at 35.00%

>Cluster 146

0 31aa, >antimicrobial;antiv... at 70.97%  
1 31aa, >antimicrobial... at 74.19%  
2 178aa, >Antimicrobial... \*  
3 31aa, >antimicrobial... at 61.29%  
4 29aa, >Antibacterial;antim... at 44.83%  
5 33aa, >antimicrobial... at 45.45%  
6 30aa, >Antimicrobial;Antim... at 46.67%  
7 21aa, >antimicrobial... at 42.86%  
8 30aa, >antimicrobial... at 46.67%  
9 32aa, >antimicrobial... at 56.25%  
10 31aa, >Antibacterial;Antim... \*  
11 18aa, >antibacterial;antim... at 44.44%



```

12 30aa, >antimicrobial... at 63.33%
13 30aa, >Antimicrobial;Antim... *
14 29aa, >Antimicrobial... at 82.76%
15 31aa, >anti-HIV;antiviral... at 64.52%
16 26aa, >antibacterial... at 50.00%
17 144aa, >Antimicrobial... at 78.19%
18 179aa, >Antimicrobial... *
19 116aa, >Antimicrobial... at 50.86%
20 115aa, >Antimicrobial... at 55.65%
21 113aa, >Antimicrobial... at 51.33%
22 113aa, >Antimicrobial... at 52.21%
23 114aa, >Antimicrobial... at 58.77%
24 113aa, >Antimicrobial... at 47.79%
25 28aa, >antimicrobial;antiv... at 32.86%
26 31aa, >Antimicrobial;Antim... at 37.74%
27 16aa, >antibacterial;antim... at 36.25%
28 31aa, >antibacterial06488... at 43.87%
29 31aa, >antibacterial06490... at 58.06%
30 30aa, >antibacterial06941... at 56.67%
31 31aa, >L02A001810... at 77.42%
32 30aa, >antibacterial06950... at 80.00%
33 20aa, >antibacterial07035... at 45.00%
34 11aa, >antibacterial08224... at 45.45%
35 30aa, >antibacterial11413... at 70.00%
36 31aa, >antibacterial11439... at 51.61%
>Cluster 147
0 179aa, >Antimicrobial... *
1 37aa, >antimicrobial... at 48.65%
2 41aa, >Gram-... at 41.46%
3 16aa, >antibacterial08414... at 43.75%
4 20aa, >antibacterial09118... at 35.00%
5 17aa, >antibacterial09495... at 41.18%
6 32aa, >antibacterial10499... at 43.75%
7 18aa, >antibacterial113210... at 50.00%
>Cluster 148
0 14aa, >anti-Gram+;Gram-... at 42.86%
1 178aa, >Antimicrobial... *
2 37aa, >Antimicrobial... at 40.54%
3 18aa, >antibacterial06508... at 44.44%
4 13aa, >antibacterial07576... at 46.15%
5 36aa, >antibacterial111365... at 41.67%
6 28aa, >antibacterial112746... at 42.86%
>Cluster 149
0 177aa, >Antibacterial... *
1 17aa, >antibacterial08242... at 41.18%
2 17aa, >antibacterial08246... at 41.18%
3 17aa, >antibacterial08249... at 47.06%
4 13aa, >antibacterial110465... at 46.15%
>Cluster 150
0 169aa, >Antimicrobial... at 63.91%
1 25aa, >anti-Gram+;Gram-... at 44.00%
2 160aa, >Antimicrobial... at 60.00%
3 164aa, >Antimicrobial... at 50.00%
4 162aa, >Antimicrobial... at 56.17%

```

```

5      36aa, >antibacterial;antim... at 44.44%
6      175aa, >Antimicrobial... *
7      111aa, >Antimicrobial... at 65.77%
8      131aa, >Antimicrobial... at 44.27%
9      20aa, >antibacterial07763... at 35.00%
10     22aa, >antibacterial08717... at 40.91%
11     26aa, >antibacterial11378... at 46.15%
>Cluster 151
0      130aa, >Antibacterial... at 53.08%
1      155aa, >Anti-Gram-... at 54.19%
2      155aa, >Anti-Gram-... at 52.26%
3      153aa, >Anti-Gram-... at 54.25%
4      21aa, >anti-Gram+;Gram-... at 47.62%
5      161aa, >Anti-Gram-... at 51.55%
6      156aa, >Antimicrobial... *
7      18aa, >antibacterial07888... at 44.44%
8      19aa, >antibacterial10389... at 42.11%
9      18aa, >antibacterial113064... at 44.44%
10     163aa, >antibacterial113430... at 60.74%
11     174aa, >antibacterial113431... *
>Cluster 152
0      166aa, >Antibacterial... at 72.29%
1      30aa, >antimicrobial... at 35.00%
2      37aa, >Antibacterial;Antim... at 40.54%
3      169aa, >Antibacterial... at 77.51%
4      172aa, >Antibacterial... *
5      13aa, >antimicrobial... at 53.85%
6      11aa, >antibacterial07625... at 63.64%
7      19aa, >antibacterial08585... at 42.11%
8      35aa, >antibacterial09331... at 35.00%
9      11aa, >antibacterial110660... at 45.45%
>Cluster 153
0      25aa, >antibacterial;antif... at 35.00%
1      30aa, >anti-Gram+;antibact... at 43.33%
2      171aa, >Antimicrobial... *
3      169aa, >Antimicrobial... at 67.46%
4      171aa, >Antimicrobial... at 69.59%
5      18aa, >antibacterial08593... at 44.44%
>Cluster 154
0      23aa, >antibacterial;Antif... at 43.48%
1      20aa, >antimicrobial... at 45.00%
2      26aa, >antibacterial;Antif... at 42.31%
3      171aa, >Anti-Gram-... *
4      18aa, >Antimicrobial... at 50.00%
5      18aa, >Antimicrobial... at 44.44%
6      14aa, >Anti-Gram-... at 42.86%
7      15aa, >Antibacterial... *
8      20aa, >antibacterial07596... at 45.00%
9      11aa, >antibacterial07859... at 45.45%
10     25aa, >antibacterial08008... at 44.00%
11     25aa, >antibacterial08010... at 44.00%
12     16aa, >antibacterial08323... at 43.75%
13     23aa, >antibacterial09222... at 47.83%
14     11aa, >antibacterial09349... at 45.45%

```

```

15 13aa, >antibacterial09843... at 46.15%
16 25aa, >antibacterial09877... at 35.00%
17 14aa, >antibacterial10207... at 42.86%
18 15aa, >antibacterial10723... at 35.00%
19 23aa, >antibacterial11606... at 43.48%
20 13aa, >antibacterial11811... *
21 22aa, >antibacterial11823... at 40.91%
22 18aa, >antibacterial11906... at 44.44%
23 11aa, >antibacterial12384... at 45.45%
24 17aa, >antibacterial12689... at 41.18%
>Cluster 155
0 169aa, >Antibacterial... *
1 17aa, >antibacterial08023... at 41.18%
2 17aa, >antibacterial08676... at 41.18%
3 18aa, >antibacterial11530... at 44.44%
4 15aa, >antibacterial12125... at 46.67%
>Cluster 156
0 30aa, >antimicrobial... at 35.00%
1 30aa, >Antibacterial;Antif... at 50.00%
2 13aa, >antimicrobial... *
3 122aa, >Antibacterial... at 59.02%
4 18aa, >Antibacterial;Antif... at 50.00%
5 117aa, >Antimicrobial... at 59.83%
6 25aa, >anti-Gram+;Antibact... at 35.00%
7 33aa, >antibacterial;antif... at 42.42%
8 164aa, >Antibacterial... at 69.51%
9 169aa, >Antibacterial... *
10 117aa, >Antibacterial... at 64.10%
11 117aa, >Antimicrobial... at 69.23%
12 22aa, >antibacterial08622... at 40.91%
13 21aa, >antibacterial08624... at 42.86%
14 19aa, >antibacterial09143... at 47.37%
15 19aa, >antibacterial09146... at 47.37%
16 25aa, >antibacterial10845... at 44.00%
17 19aa, >antibacterial11955... at 42.11%
>Cluster 157
0 40aa, >antibacterial;antim... at 35.00%
1 24aa, >antimicrobial... at 41.67%
2 33aa, >antimicrobial... at 42.42%
3 35aa, >Antimicrobial... at 35.00%
4 23aa, >anti-Gram+;antibact... at 43.48%
5 24aa, >anti-Gram+;antibact... at 45.83%
6 130aa, >Antimicrobial... at 41.54%
7 116aa, >Antimicrobial... *
8 116aa, >Antimicrobial... at 57.76%
9 115aa, >Antimicrobial... at 46.09%
10 123aa, >Antimicrobial... at 58.54%
11 130aa, >Antimicrobial... at 58.46%
12 123aa, >Antimicrobial... at 60.98%
13 166aa, >Antimicrobial... *
14 122aa, >Antimicrobial... at 51.64%
15 113aa, >Antimicrobial... at 41.59%
16 119aa, >Antimicrobial... at 45.38%
17 119aa, >Antimicrobial... at 47.06%

```

```

18    61aa, >Antimicrobial... *
19    25aa, >antibacterial06678... at 35.00%
20    79aa, >antibacterial07269... at 44.30%
21    18aa, >antibacterial07808... at 44.44%
22    13aa, >antibacterial10550... at 46.15%
23    17aa, >antibacterial11521... at 41.18%
24    27aa, >antibacterial13031... at 40.74%
>Cluster 158
0     147aa, >Antimicrobial... at 46.26%
1     164aa, >Antibacterial... *
2     144aa, >Antibacterial... at 62.07%
3     145aa, >Antimicrobial... at 44.14%
4     39aa, >Antimicrobial... at 43.59%
5     18aa, >antimicrobial... at 44.44%
6     40aa, >Antimicrobial... at 35.00%
7     13aa, >antibacterial06604... at 46.15%
8     11aa, >antibacterial08286... at 45.45%
9     18aa, >antibacterial08337... at 50.00%
10    17aa, >antibacterial08350... at 41.18%
11    16aa, >antibacterial08360... *
12    18aa, >antibacterial09325... at 44.44%
13    13aa, >antibacterial10469... at 46.15%
>Cluster 159
0     13aa, >Antibacterial... at 46.15%
1     164aa, >Antimicrobial... *
2     18aa, >antimicrobial... at 44.44%
3     33aa, >Gram-... at 45.45%
4     25aa, >antibacterial07416... at 35.00%
5     13aa, >antibacterial07507... at 46.15%
6     22aa, >antibacterial07789... at 40.91%
7     16aa, >antibacterial08322... at 50.00%
8     17aa, >antibacterial08332... at 41.18%
9     18aa, >antibacterial08339... at 44.44%
10    18aa, >antibacterial08626... *
11    23aa, >antibacterial112380... at 43.48%
12    13aa, >antibacterial112980... at 46.15%
>Cluster 160
0     14aa, >antimicrobial... at 42.86%
1     24aa, >anti-Gram+;Antibact... at 41.67%
2     163aa, >Antibacterial... *
3     24aa, >Antibacterial... at 41.67%
4     24aa, >antimicrobial... at 41.67%
5     24aa, >anti-Gram+;antibact... at 41.67%
6     18aa, >antimicrobial... at 44.44%
7     18aa, >antibacterial09854... at 44.44%
8     27aa, >antibacterial10446... at 40.74%
9     24aa, >antibacterial113246... at 41.67%
10    24aa, >antibacterial113248... at 41.67%
11    20aa, >antibacterial113399... at 35.00%
>Cluster 161
0     30aa, >antimicrobial... at 35.00%
1     23aa, >antimicrobial... at 47.83%
2     22aa, >antimicrobial... at 40.91%
3     160aa, >Antimicrobial... *

```

```

4      24aa, >antibacterial07741... at 41.67%
>Cluster 162
0      21aa, >anti-Gram+;antibact... at 52.38%
1      40aa, >anti-Gram+;Antibact... at 42.50%
2      25aa, >antibacterial;antif... at 44.00%
3      159aa, >Antimicrobial... *
4      74aa, >Antimicrobial... at 44.59%
5      19aa, >antibacterial;antim... at 42.11%
6      41aa, >Antimicrobial... at 56.10%
7      73aa, >Antimicrobial... at 41.10%
8      40aa, >Antimicrobial... *
9      91aa, >Antimicrobial... at 56.04%
10     69aa, >Antimicrobial... at 43.48%
11     41aa, >Antimicrobial... at 48.78%
12     36aa, >Antimicrobial... at 47.22%
13     39aa, >Anti-Gram-... at 41.03%
14     41aa, >Antimicrobial... at 41.46%
15     45aa, >Antimicrobial... at 42.22%
16     16aa, >anti-Gram-;antibact... at 50.00%
17     21aa, >antibacterial11064... at 42.86%
>Cluster 163
0      14aa, >antibacterial... at 42.86%
1      24aa, >antimicrobial... at 45.83%
2      24aa, >antimicrobial... at 41.67%
3      21aa, >antimicrobial... at 47.62%
4      131aa, >Antibacterial... at 43.51%
5      130aa, >Antibacterial... at 46.92%
6      130aa, >Antibacterial... at 45.38%
7      130aa, >Antibacterial... at 43.85%
8      130aa, >Antibacterial... at 45.38%
9      130aa, >Antibacterial... at 46.15%
10     129aa, >Antibacterial... at 44.96%
11     125aa, >Antibacterial... at 45.60%
12     130aa, >Antibacterial... at 46.15%
13     130aa, >Antibacterial... at 45.38%
14     130aa, >Antibacterial... at 50.00%
15     129aa, >Antibacterial... *
16     129aa, >Antibacterial... at 45.74%
17     130aa, >Antibacterial... at 47.69%
18     120aa, >Antibacterial... at 43.33%
19     129aa, >Antibacterial... at 40.31%
20     120aa, >Antibacterial... at 43.33%
21     129aa, >Antibacterial... at 44.96%
22     121aa, >antifungal... at 42.15%
23     119aa, >Antibacterial... at 43.70%
24     130aa, >Antibacterial... at 41.54%
25     130aa, >Antibacterial... at 46.15%
26     129aa, >Antibacterial... at 41.09%
27     129aa, >Antibacterial... at 41.09%
28     130aa, >Antibacterial... at 47.69%
29     130aa, >anti-Gram+;Antibact... at 46.92%
30     128aa, >Antibacterial... at 47.66%
31     129aa, >Antibacterial... at 45.74%
32     130aa, >Antibacterial... at 47.69%

```

```

33 129aa, >Antibacterial... *
34 129aa, >Antibacterial... at 44.96%
35 130aa, >Antibacterial... at 43.85%
36 130aa, >Antibacterial... at 43.08%
37 130aa, >Antibacterial;Antif... at 51.54%
38 129aa, >Antibacterial... at 46.51%
39 129aa, >Antimicrobial... at 45.74%
40 129aa, >Antibacterial... at 44.19%
41 129aa, >Antibacterial... at 46.51%
42 129aa, >Antibacterial... at 47.29%
43 130aa, >Antibacterial;Antif... at 50.00%
44 129aa, >Antibacterial... at 44.96%
45 158aa, >Antibacterial... *
46 128aa, >Antibacterial... at 43.75%
47 49aa, >Antibacterial... at 40.82%
48 26aa, >antibacterial07784... at 42.31%
49 18aa, >antibacterial09551... at 44.44%
50 24aa, >antibacterial09723... at 41.67%
>Cluster 164
0 35aa, >Antimicrobial... at 42.86%
1 147aa, >Antimicrobial... at 40.82%
2 30aa, >antimicrobial... at 35.00%
3 23aa, >Antifungal... at 43.48%
4 158aa, >Antimicrobial... *
5 21aa, >antimicrobial... at 47.62%
6 19aa, >anti-Gram-;antibact... at 47.37%
7 19aa, >antibacterial06563... at 42.11%
8 22aa, >antibacterial10706... at 40.91%
>Cluster 165
0 16aa, >Antibacterial... at 56.25%
1 157aa, >Antibacterial... *
2 26aa, >antibacterial11599... at 42.31%
>Cluster 166
0 23aa, >Antimicrobial... at 47.83%
1 157aa, >Antimicrobial... *
2 23aa, >antibacterial11359... at 43.48%
3 19aa, >antibacterial13130... at 52.63%
4 19aa, >antibacterial13134... at 52.63%
5 19aa, >antibacterial13136... at 47.37%
6 19aa, >antibacterial13139... at 42.11%
7 19aa, >antibacterial13140... at 52.63%
8 19aa, >antibacterial13141... at 42.11%
9 19aa, >antibacterial13142... at 52.63%
10 12aa, >antibacterial13403... at 41.67%
>Cluster 167
0 18aa, >antibacterial;Antif... at 44.44%
1 21aa, >antimicrobial... at 42.86%
2 157aa, >Antimicrobial... *
3 141aa, >Antimicrobial... at 40.43%
4 73aa, >Antimicrobial... at 41.10%
5 35aa, >antibacterial08401... at 35.00%
6 28aa, >antibacterial10726... at 42.86%
7 18aa, >antibacterial10788... at 44.44%
8 20aa, >antibacterial11995... at 35.00%

```

```

>Cluster 168
0      120aa, >anti-Gram-... *
1      109aa, >anti-Gram-... at 67.89%
2      133aa, >anti-Gram-;Antibact... at 62.41%
3      13aa, >antimicrobial... at 46.15%
4      21aa, >antimicrobial... at 42.86%
5      21aa, >antimicrobial... at 42.86%
6      155aa, >antiviral... *
7      49aa, >antibacterial07322... at 46.94%
8      20aa, >antibacterial07814... at 45.00%
9      13aa, >antibacterial09035... at 53.85%
10     20aa, >antibacterial09124... at 35.00%
11     20aa, >antibacterial09127... at 35.00%
12     14aa, >antibacterial09465... at 50.00%
13     19aa, >antibacterial09925... at 52.63%
14     20aa, >antibacterial10622... at 35.00%
15     18aa, >antibacterial10939... at 44.44%
16     18aa, >antibacterial10945... at 44.44%
17     19aa, >antibacterial11115... *
18     20aa, >antibacterial11120... at 44.44%
>Cluster 169
0      23aa, >Antibacterial;Antim... at 43.48%
1      152aa, >Antimicrobial... *
>Cluster 170
0      152aa, >Gram-... *
1      13aa, >antibacterial110430... at 46.15%
2      12aa, >antibacterial111489... at 41.67%
>Cluster 171
0      42aa, >anti-Gram+;antibact... at 40.48%
1      151aa, >Antimicrobial... *
2      28aa, >anti-Gram+;antibact... at 42.86%
3      17aa, >antibacterial08243... at 41.18%
4      18aa, >antibacterial08405... at 50.00%
5      21aa, >antibacterial08716... at 42.86%
6      18aa, >antibacterial112827... at 50.00%
>Cluster 172
0      150aa, >Antibacterial... *
1      150aa, >Antimicrobial... at 67.33%
2      148aa, >Antimicrobial... at 56.08%
3      148aa, >Antimicrobial... at 52.03%
4      149aa, >Antimicrobial... at 73.83%
5      145aa, >Antimicrobial... at 66.21%
6      150aa, >Antimicrobial... at 78.00%
7      148aa, >Antimicrobial... at 51.35%
8      20aa, >antibacterial07951... at 35.00%
9      28aa, >antibacterial112755... at 42.86%
>Cluster 173
0      149aa, >Antibacterial... at 67.11%
1      150aa, >Antibacterial... *
2      149aa, >anti-Gram+;Antibact... at 70.47%
3      28aa, >antimicrobial... at 42.86%
4      138aa, >Antibacterial... at 72.03%
5      137aa, >Antibacterial... at 70.80%
6      30aa, >L02A001809... at 35.00%

```

```

7      30aa, >antibacterial13164... at 33.33%
>Cluster 174
0      24aa, >antimicrobial... at 45.83%
1      31aa, >antimicrobial... at 45.16%
2      78aa, >Antimicrobial... at 69.23%
3      32aa, >antimicrobial... at 40.62%
4      31aa, >antimicrobial... at 41.94%
5      18aa, >antibacterial... at 44.44%
6      148aa, >Antimicrobial... *
7      17aa, >anti-Gram+;antibact... at 41.18%
8      79aa, >Antimicrobial... at 64.56%
9      145aa, >Antimicrobial... at 57.24%
10     145aa, >Antimicrobial... at 53.10%
11     145aa, >Antimicrobial... at 59.31%
12     143aa, >Antimicrobial... at 53.85%
13     78aa, >antibacterial06983... at 62.82%
14     19aa, >antibacterial08657... at 42.11%
15     13aa, >antibacterial11469... at 53.85%
16     18aa, >antibacterial11898... at 44.44%
17     19aa, >antibacterial12015... at 47.37%
18     19aa, >antibacterial12017... *
19     21aa, >antibacterial12171... at 42.86%
>Cluster 175
0      31aa, >antimicrobial... at 45.16%
1      30aa, >Antiviral... at 46.67%
2      27aa, >antimicrobial... at 51.85%
3      45aa, >Antimicrobial... at 42.22%
4      46aa, >antimicrobial... *
5      41aa, >antibacterial;Antim... at 56.10%
6      46aa, >Antibacterial... at 58.70%
7      46aa, >Antibacterial... at 58.70%
8      46aa, >Antimicrobial... at 54.35%
9      46aa, >Antimicrobial;Antim... at 56.52%
10     46aa, >Antimicrobial;Antim... at 52.17%
11     47aa, >Antibacterial;Antim... at 53.19%
12     44aa, >anti-Gram+;antibact... at 61.36%
13     45aa, >anti-Gram+;antibact... at 53.33%
14     135aa, >Antimicrobial... at 49.63%
15     148aa, >Antimicrobial... *
16     112aa, >Antimicrobial... *
17     135aa, >Antimicrobial... at 53.33%
18     135aa, >Antimicrobial... at 48.15%
19     135aa, >Antimicrobial... at 48.89%
20     13aa, >antimicrobial... at 46.15%
21     46aa, >antibacterial07054... at 54.35%
22     20aa, >antibacterial07941... at 35.00%
23     24aa, >antibacterial08497... at 41.67%
24     16aa, >antibacterial08984... at 43.75%
25     45aa, >antibacterial09164... at 35.00%
26     25aa, >antibacterial11105... at 35.00%
27     15aa, >antibacterial11598... at 46.67%
>Cluster 176
0      26aa, >Antimicrobial... at 50.00%
1      35aa, >Antibacterial... at 35.00%

```



2 27aa, >anti-Gram+;Antimicr... at 41.85%  
 3 27aa, >antibacterial;Antif... at 38.15%  
 4 27aa, >anti-Gram-;antibact... at 51.85%  
 5 26aa, >antibacterial;Antif... at 32.31%  
 6 114aa, >Antimicrobial... at 79.86%  
 7 129aa, >Antimicrobial... at 81.94%  
 8 134aa, >Antimicrobial... at 87.50%  
 9 136aa, >Antimicrobial... \*  
 10 141aa, >Antimicrobial... at 75.52%  
 11 144aa, >Antimicrobial... at 79.17%  
 12 144aa, >Antimicrobial... at 79.86%  
 13 148aa, >Antimicrobial... \*  
 14 78aa, >Antimicrobial... \*  
 15 145aa, >Antimicrobial... at 80.34%  
 16 144aa, >Antimicrobial... at 83.33%  
 17 144aa, >Antimicrobial... at 81.94%  
 18 134aa, >Antimicrobial... at 82.84%  
 19 148aa, >Antimicrobial... at 82.43%  
 20 71aa, >Antimicrobial... at 80.28%  
 21 144aa, >Antimicrobial... \*  
 22 145aa, >Antimicrobial... at 82.76%  
 23 144aa, >Antimicrobial... at 81.25%  
 24 145aa, >Antimicrobial... at 80.28%  
 25 144aa, >Antimicrobial... at 79.86%  
 26 142aa, >Antimicrobial... at 80.28%  
 27 148aa, >Antimicrobial... \*  
 28 143aa, >Antimicrobial... at 83.22%  
 29 144aa, >Antimicrobial... at 79.17%  
 30 139aa, >Antimicrobial... at 81.29%  
 31 145aa, >Antimicrobial... at 84.83%  
 32 113aa, >Antimicrobial... at 71.68%  
 33 142aa, >Antimicrobial... at 80.99%  
 34 144aa, >Antimicrobial... at 82.64%  
 35 144aa, >Antimicrobial... at 77.08%  
 36 144aa, >Antimicrobial... at 72.22%  
 37 22aa, >antibacterial108061... at 30.91%  
 38 27aa, >antibacterial110398... \*  
 39 36aa, >antibacterial110770... at 44.44%  
 40 18aa, >antibacterial111178... at 40.00%  
 41 27aa, >antibacterial111801... \*  
 42 27aa, >antibacterial111810... at 52.96%  
 43 26aa, >antibacterial112861... at 50.00%

>Cluster 177

0 17aa, >antimicrobial... at 41.18%  
 1 101aa, >Antimicrobial... \*  
 2 89aa, >Antimicrobial... at 52.81%  
 3 95aa, >Antimicrobial... at 44.21%  
 4 146aa, >Antimicrobial... \*  
 5 113aa, >Antimicrobial... at 40.71%  
 6 87aa, >Antimicrobial... at 59.77%  
 7 91aa, >Antimicrobial... at 69.23%  
 8 106aa, >Antimicrobial... at 45.28%  
 9 14aa, >antibacterial110197... at 42.86%  
 10 27aa, >antibacterial112179... at 40.74%

```

11    31aa, >antibacterial13378... at 41.94%
>Cluster 178
0    32aa, >antimicrobial... at 40.62%
1    32aa, >antimicrobial... at 43.75%
2    33aa, >anti-Gram-;antibact... at 42.42%
3    32aa, >antimicrobial... at 40.62%
4    41aa, >antibacterial;antim... at 48.78%
5    23aa, >antibacterial;antim... at 52.17%
6    23aa, >antimicrobial.... at 52.17%
7    20aa, >antibacterial;antim... at 45.00%
8    30aa, >antibacterial;antim... *
9    25aa, >antibacterial;Antif... at 35.00%
10   20aa, >anti-Gram+;antibact... at 35.00%
11   49aa, >antibacterial;antim... at 53.06%
12   42aa, >antibacterial;antim... at 52.38%
13   29aa, >antimicrobial... at 44.83%
14   146aa, >Antibacterial... *
15   40aa, >antibacterial;antim... at 45.00%
16   18aa, >antibacterial07045... at 44.44%
17   15aa, >antibacterial08194... at 35.00%
18   22aa, >antibacterial09043... at 59.09%
19   22aa, >antibacterial09045... at 59.09%
20   66aa, >antibacterial09159... at 42.42%
21   33aa, >antibacterial09867... at 45.45%
22   27aa, >antibacterial11333... at 40.74%
>Cluster 179
0    26aa, >antibacterial... at 42.31%
1    145aa, >Antimicrobial... *
2    12aa, >antimicrobial... at 50.00%
3    38aa, >antibacterial07622... at 44.74%
4    17aa, >antibacterial07697... at 41.18%
5    19aa, >antibacterial07760... at 47.37%
6    24aa, >antibacterial08136... at 45.83%
7    13aa, >antibacterial09218... at 46.15%
8    16aa, >antibacterial09847... at 43.75%
9    14aa, >antibacterial10865... at 42.86%
10   19aa, >antibacterial11310... at 42.11%
>Cluster 180
0    143aa, >Antifungal... *
1    44aa, >antibacterial06623... at 40.91%
2    22aa, >antibacterial06649... at 40.91%
3    13aa, >antibacterial11284... at 46.15%
4    33aa, >antibacterial11767... at 42.42%
5    15aa, >antibacterial12098... at 46.67%
6    25aa, >antibacterial12691... at 44.00%
>Cluster 181
0    13aa, >antimicrobial... at 46.15%
1    24aa, >anti-Gram+;Antibact... at 41.67%
2    24aa, >anti-Gram+;antibact... at 41.67%
3    28aa, >antimicrobial... at 42.86%
4    143aa, >antifungal... *
5    22aa, >antibacterial08583... at 45.45%
6    13aa, >antibacterial09759... at 46.15%
>Cluster 182

```

```

0      142aa, >Antibacterial... *
1      19aa, >antibacterial07408... at 42.11%
2      16aa, >antibacterial07745... at 43.75%
3      17aa, >antibacterial07750... at 41.18%
4      19aa, >antibacterial09491... at 42.11%
>Cluster 183
0      24aa, >anti-Gram+;antibact... at 41.67%
1      103aa, >Antimicrobial... at 41.75%
2      29aa, >antimicrobial... at 44.83%
3      130aa, >Antimicrobial... at 46.92%
4      46aa, >antibacterial;Antim... at 56.52%
5      45aa, >Antimicrobial... at 53.33%
6      46aa, >Antibacterial;Antif... *
7      112aa, >Antimicrobial... at 47.32%
8      137aa, >Antimicrobial... at 68.61%
9      137aa, >Antimicrobial... at 66.42%
10     138aa, >Antimicrobial... at 59.42%
11     135aa, >Antimicrobial... *
12     135aa, >Antimicrobial... at 53.33%
13     135aa, >Antimicrobial... at 51.85%
14     137aa, >Antimicrobial... at 67.15%
15     142aa, >Antimicrobial... *
16     137aa, >Antimicrobial... at 71.53%
17     136aa, >Antimicrobial... at 68.38%
18     114aa, >Antimicrobial... at 41.23%
19     134aa, >Antimicrobial... at 44.78%
20     134aa, >Antimicrobial... at 40.30%
21     133aa, >Antimicrobial... at 45.86%
22     140aa, >Antimicrobial... at 43.57%
23     140aa, >Antimicrobial... at 46.43%
24     121aa, >Antimicrobial... at 42.15%
25     133aa, >Antimicrobial... at 48.87%
26     137aa, >Antimicrobial... at 54.01%
27     137aa, >Antimicrobial... at 54.74%
28     137aa, >Antimicrobial... at 47.45%
29     137aa, >Antimicrobial... at 49.64%
30     136aa, >Antimicrobial... at 47.79%
31     137aa, >Antimicrobial... at 50.36%
32     136aa, >Antimicrobial... at 52.21%
33     136aa, >Antimicrobial... at 48.53%
34     139aa, >Antimicrobial... at 53.24%
35     139aa, >Antimicrobial... at 53.96%
36     114aa, >Antimicrobial... at 45.61%
37     126aa, >Antimicrobial... at 56.35%
38     11aa, >antibacterial07872... at 54.55%
39     11aa, >antibacterial07873... at 45.45%
40     18aa, >antibacterial11466... at 50.00%
>Cluster 184
0      19aa, >Antimicrobial... at 42.11%
1      142aa, >Antibacterial... *
2      19aa, >antibacterial;antim... at 42.11%
3      20aa, >antibacterial110938... at 45.00%
4      24aa, >antibacterial11677... at 41.67%
>Cluster 185

```

```

0      142aa, >Antimicrobial... *
>Cluster 186
0      141aa, >Antibacterial... *
1      18aa, >Antibacterial;Antif... at 44.44%
2      20aa, >antibacterial;antim... at 50.00%
3      14aa, >antibacterial07332... at 42.86%
4      17aa, >antibacterial08244... at 41.18%
>Cluster 187
0      28aa, >antimicrobial... at 46.43%
1      31aa, >antimicrobial... at 61.29%
2      93aa, >Antimicrobial... at 47.31%
3      31aa, >antimicrobial... at 45.16%
4      31aa, >antimicrobial... *
5      28aa, >antibacterial;antim... at 46.43%
6      33aa, >antimicrobial;antiv... at 51.52%
7      30aa, >antimicrobial... at 50.00%
8      22aa, >Antibacterial... at 40.91%
9      31aa, >antimicrobial... at 74.19%
10     31aa, >antimicrobial... at 64.52%
11     31aa, >antimicrobial... *
12     31aa, >antimicrobial... at 64.52%
13     29aa, >antimicrobial... at 62.07%
14     28aa, >Anti-Gram-;antibact... at 64.29%
15     30aa, >antimicrobial;antiv... at 66.67%
16     25aa, >anti-Gram-... at 44.00%
17     31aa, >antimicrobial;antiv... at 61.29%
18     30aa, >antimicrobial... at 63.33%
19     30aa, >antimicrobial... at 70.00%
20     31aa, >Antimicrobial... at 61.29%
21     128aa, >Antimicrobial... at 80.47%
22     141aa, >Antimicrobial... *
23     64aa, >Antimicrobial... at 48.44%
24     31aa, >antibacterial06553... at 61.29%
25     30aa, >antibacterial06949... at 66.67%
26     26aa, >antibacterial07059... at 42.31%
27     32aa, >L02A001915... at 56.25%
28     31aa, >antibacterial07447... at 61.29%
29     18aa, >antibacterial08993... at 50.00%
30     21aa, >antibacterial09946... at 42.86%
31     15aa, >antibacterial10440... at 35.00%
32     13aa, >antibacterial11793... at 53.85%
>Cluster 188
0      22aa, >anti-Gram+;antibact... at 40.91%
1      21aa, >Anti-Gram-;antibact... at 42.86%
2      27aa, >antibacterial;antim... *
3      32aa, >antibacterial;antim... at 40.62%
4      23aa, >anti-Gram+;Antibact... at 43.48%
5      24aa, >Antibacterial;Antif... at 41.67%
6      24aa, >anti-Gram+;Antibact... at 41.67%
7      36aa, >antibacterial;antim... at 69.44%
8      46aa, >antibacterial;antim... at 67.39%
9      46aa, >antibacterial;antim... at 71.74%
10     42aa, >anti-Gram-;antibact... at 66.67%
11     40aa, >antibacterial;antim... at 67.50%

```

```

12    141aa, >Antibacterial... *
13    24aa, >antibacterial08279... at 41.67%
14    26aa, >antibacterial08347... at 50.00%
15    42aa, >antibacterial10652... at 54.76%
16    18aa, >antibacterial11184... at 44.44%
>Cluster 189
0     26aa, >antibiotic;Antimicr... at 46.15%
1     140aa, >Gram-... *
2     13aa, >antibacterial07802... at 46.15%
3     16aa, >antibacterial112109... at 43.75%
4     21aa, >antibacterial112354... at 42.86%
5     21aa, >antibacterial112409... at 42.86%
>Cluster 190
0     24aa, >anti-Gram+;antibact... at 45.83%
1     32aa, >anti-Gram+;Antibact... at 40.62%
2     23aa, >antimicrobial... at 43.48%
3     25aa, >antibacterial;antim... at 44.00%
4     140aa, >anti-Gram+;antifung... *
5     39aa, >Antimicrobial... at 41.03%
6     23aa, >antibacterial06647... at 33.48%
7     26aa, >antibacterial07785... at 46.15%
8     22aa, >antibacterial08758... at 30.91%
9     16aa, >antibacterial111850... at 43.75%
10    27aa, >antibacterial112135... at 40.74%
>Cluster 191
0     19aa, >antimicrobial... at 37.37%
1     87aa, >Antimicrobial... at 45.98%
2     96aa, >Antimicrobial... at 45.83%
3     81aa, >Antimicrobial... at 55.56%
4     41aa, >Antimicrobial... at 41.46%
5     118aa, >Antimicrobial... at 77.12%
6     137aa, >Antimicrobial... at 71.97%
7     137aa, >Antimicrobial... *
8     127aa, >Antimicrobial... at 39.48%
9     140aa, >Antimicrobial... *
10    139aa, >Antimicrobial... at 74.17%
11    11aa, >antibacterial08921... at 32.45%
12    18aa, >antibacterial09711... at 31.44%
13    29aa, >antibacterial112775... at 34.83%
>Cluster 192
0     30aa, >Antifungal;Gram-... at 43.33%
1     138aa, >Antimicrobial... *
2     30aa, >antibacterial110294... at 43.33%
3     45aa, >antibacterial110298... at 44.44%
4     15aa, >antibacterial111666... at 36.67%
>Cluster 193
0     137aa, >anti-Gram+;antifung... *
1     27aa, >Antifungal;Antimicr... at 44.44%
2     24aa, >antibacterial08134... at 45.83%
3     19aa, >antibacterial08203... at 32.11%
4     19aa, >antibacterial08205... at 32.11%
5     18aa, >antibacterial110374... at 44.44%
6     25aa, >antibacterial111427... at 35.00%
>Cluster 194

```

```

0      136aa, >anti-Gram-... *
1      27aa, >antibacterial06675... at 40.74%
2      26aa, >antibacterial06677... at 42.31%
3      25aa, >antibacterial07778... at 44.00%
4      25aa, >antibacterial08846... at 44.00%
5      13aa, >antibacterial08895... *
6      11aa, >antibacterial09332... at 45.45%
7      27aa, >antibacterial09336... at 40.74%
8      11aa, >antibacterial09819... at 45.45%
9      24aa, >antibacterial12014... at 41.67%
>Cluster 195
0      34aa, >Antimicrobial... at 41.18%
1      44aa, >Antimicrobial... at 40.91%
2      39aa, >Antimicrobial... at 43.59%
3      50aa, >Antimicrobial... at 44.00%
4      28aa, >antimicrobial... at 42.86%
5      33aa, >anti-Gram+;antibact... at 42.42%
6      43aa, >Antibacterial;Antim... at 58.14%
7      37aa, >anti-Gram+;Antibact... at 36.76%
8      43aa, >Antimicrobial... at 83.72%
9      43aa, >Antimicrobial... *
10     36aa, >antimicrobial... at 44.44%
11     35aa, >Antimicrobial... at 42.86%
12     66aa, >Antimicrobial... at 45.45%
13     61aa, >Antimicrobial... at 59.02%
14     61aa, >Antimicrobial... at 52.46%
15     63aa, >Antimicrobial... at 42.86%
16     136aa, >Antimicrobial... *
17     71aa, >Antimicrobial... at 49.30%
18     62aa, >Antimicrobial... at 40.32%
19     62aa, >Antimicrobial... at 41.94%
20     58aa, >Antimicrobial... at 74.14%
21     55aa, >Antimicrobial... at 41.82%
22     71aa, >Antimicrobial... at 43.66%
23     71aa, >Antimicrobial... at 43.66%
24     62aa, >Antimicrobial... at 59.68%
25     67aa, >Antimicrobial... at 43.28%
26     73aa, >Antimicrobial... at 45.21%
27     70aa, >Antimicrobial... at 45.71%
28     62aa, >Antimicrobial... at 58.06%
29     62aa, >Antimicrobial... at 40.32%
30     59aa, >Antimicrobial... at 40.68%
31     103aa, >Antimicrobial... *
32     61aa, >Antimicrobial... *
33     43aa, >anti-Gram+;antibact... at 48.84%
34     39aa, >antibacterial;antim... at 53.85%
35     49aa, >Antimicrobial... at 44.90%
36     41aa, >antibacterial07063... at 65.85%
37     11aa, >antibacterial07871... at 45.45%
38     44aa, >antibacterial08510... at 52.27%
39     44aa, >antibacterial08869... at 68.18%
40     47aa, >antibacterial09763... at 53.19%
41     21aa, >antibacterial10236... at 47.62%
42     29aa, >antibacterial11383... at 48.28%

```

```

43    20aa, >antibacterial11974... at 35.00%
44    36aa, >antibacterial12451... at 47.22%
45    33aa, >antibacterial12620... at 45.45%
46    20aa, >antibacterial13104... at 35.00%
>Cluster 196
0     29aa, >anti-Gram+;antibact... at 41.38%
1     22aa, >anti-Gram+;antibact... at 40.91%
2     30aa, >anti-Gram+;antibact... at 50.00%
3     34aa, >antibacterial;antim... *
4     84aa, >Antimicrobial... at 45.24%
5     136aa, >Antimicrobial... *
6     38aa, >anti-Gram+;antibact... at 42.11%
7     29aa, >antibacterial06491... at 41.38%
8     28aa, >antibacterial06632... at 60.71%
9     21aa, >antibacterial06671... at 42.86%
10    32aa, >antibacterial06687... at 46.88%
11    17aa, >antibacterial07465... at 41.18%
12    24aa, >antibacterial08129... at 41.67%
13    30aa, >antibacterial08207... at 63.33%
14    26aa, >antibacterial09761... at 42.31%
15    22aa, >antibacterial10621... at 40.91%
16    18aa, >antibacterial10632... at 44.44%
17    18aa, >antibacterial10658... at 50.00%
18    37aa, >antibacterial11612... at 43.24%
19    29aa, >antibacterial12170... at 41.38%
20    21aa, >antibacterial12371... at 42.86%
21    23aa, >antibacterial13238... at 43.48%
>Cluster 197
0     28aa, >anti-Gram+;antibact... at 42.86%
1     56aa, >Antimicrobial... at 51.79%
2     135aa, >Antimicrobial... *
3     56aa, >Antimicrobial... at 55.36%
4     52aa, >Antimicrobial... at 42.31%
5     47aa, >Antimicrobial... at 42.55%
6     56aa, >Antimicrobial... *
7     34aa, >anti-Gram+;antibact... at 41.18%
8     55aa, >Antimicrobial... at 50.91%
9     55aa, >Antimicrobial... at 47.27%
10    46aa, >antibacterial;antim... at 43.48%
11    46aa, >Antimicrobial... at 47.83%
12    51aa, >Antimicrobial... at 45.10%
13    53aa, >Antimicrobial... at 52.83%
14    56aa, >Antimicrobial... at 50.00%
15    56aa, >Antimicrobial... at 48.21%
16    57aa, >Antimicrobial... at 43.86%
17    57aa, >Antimicrobial... at 43.86%
18    54aa, >Antimicrobial... at 46.30%
19    57aa, >Antimicrobial... at 42.11%
>Cluster 198
0     24aa, >antibacterial;Antif... at 45.83%
1     19aa, >antimicrobial... at 42.11%
2     134aa, >Antimicrobial... at 54.48%
3     134aa, >Antimicrobial... at 51.49%
4     135aa, >Antimicrobial... *

```

5 133aa, >Antimicrobial... at 47.37%  
6 135aa, >Antimicrobial... at 57.78%  
7 125aa, >Antimicrobial... at 52.80%  
8 134aa, >Antimicrobial... at 52.99%  
9 134aa, >Antimicrobial... at 41.79%  
10 125aa, >Antimicrobial... at 49.60%  
11 48aa, >antibacterial;antim... at 43.75%  
12 118aa, >Antimicrobial... at 45.76%  
13 127aa, >Antimicrobial... at 52.76%  
14 13aa, >antibacterial08313... at 46.15%  
15 19aa, >antibacterial09149... at 47.37%  
16 20aa, >antibacterial12600... at 35.00%

>Cluster 199

0 21aa, >antimicrobial... at 32.86%  
1 21aa, >antimicrobial... at 32.86%  
2 32aa, >antimicrobial... at 48.75%  
3 31aa, >Antimicrobial... at 48.06%  
4 28aa, >antimicrobial... at 36.43%  
5 28aa, >antimicrobial... at 40.00%  
6 24aa, >anti-Gram+;Antibact... at 30.00%  
7 29aa, >Antimicrobial;Antim... at 34.83%  
8 29aa, >antimicrobial... at 34.83%  
9 31aa, >antibacterial;antim... at 35.16%  
10 31aa, >Antimicrobial... \*  
11 30aa, >Antimicrobial;Antim... at 76.67%  
12 31aa, >antimicrobial... at 83.87%  
13 31aa, >antimicrobial... at 67.74%  
14 29aa, >antimicrobial... at 55.17%  
15 31aa, >Antimicrobial;Antim... at 67.74%  
16 28aa, >antimicrobial... at 50.00%  
17 32aa, >antimicrobial... at 40.62%  
18 17aa, >anti-Gram+;antibact... at 41.18%  
19 130aa, >Antimicrobial... at 70.77%  
20 78aa, >Antimicrobial... at 41.03%  
21 77aa, >Antimicrobial... at 42.86%  
22 77aa, >Antimicrobial... at 44.16%  
23 124aa, >Antimicrobial... at 63.71%  
24 123aa, >Antimicrobial... at 65.04%  
25 122aa, >Antimicrobial... \*  
26 132aa, >Antimicrobial... at 53.03%  
27 135aa, >Antimicrobial... \*  
28 32aa, >Antimicrobial... at 53.12%  
29 29aa, >antimicrobial... at 41.38%  
30 30aa, >antibacterial06940... at 73.33%  
31 18aa, >antibacterial11523... at 44.44%

>Cluster 200

0 135aa, >Antifungal... \*  
1 16aa, >antimicrobial... at 50.00%  
2 21aa, >antibacterial08621... at 47.62%

>Cluster 201

0 127aa, >anti-Gram+;Antibact... at 44.88%  
1 128aa, >Antibacterial;Antif... at 42.97%  
2 134aa, >antiviral... \*  
3 131aa, >antiviral... at 47.33%



```

4      127aa, >anti-Gram+;Gram-... at 44.88%
5      127aa, >anti-Gram+;Gram-... at 47.24%
6      27aa, >antibacterial09888... at 59.26%
7      30aa, >antibacterial09890... at 53.33%
8      133aa, >antibacterial13429... at 65.41%
>Cluster 202
0      133aa, >Antibacterial... *
1      17aa, >antibacterial09504... at 41.18%
2      40aa, >antibacterial11480... at 35.00%
>Cluster 203
0      20aa, >antimicrobial... at 35.00%
1      25aa, >antimicrobial... at 48.00%
2      21aa, >Antimicrobial... at 47.62%
3      133aa, >Antimicrobial... *
4      16aa, >antibacterial07955... at 43.75%
5      20aa, >antibacterial12795... at 35.00%
>Cluster 204
0      132aa, >Antimicrobial... *
1      16aa, >antimicrobial... at 43.75%
2      40aa, >Antibacterial;Antif... at 47.50%
3      11aa, >antibacterial11199... at 45.45%
>Cluster 205
0      30aa, >anti-Gram+;Antibact... at 46.67%
1      21aa, >antimicrobial... at 42.86%
2      46aa, >Antibacterial;Antif... at 45.65%
3      126aa, >Antimicrobial... at 62.70%
4      57aa, >Antimicrobial... *
5      93aa, >Antimicrobial... at 46.24%
6      93aa, >Antimicrobial... at 44.09%
7      93aa, >Antimicrobial... at 47.31%
8      97aa, >Antimicrobial... at 40.21%
9      94aa, >Antimicrobial... at 43.62%
10     94aa, >Antimicrobial... at 40.43%
11     89aa, >Antimicrobial... at 40.45%
12     89aa, >Antimicrobial... at 43.82%
13     132aa, >Antimicrobial... *
14     34aa, >Antimicrobial... at 52.94%
15     92aa, >antibacterial06840... at 42.39%
16     93aa, >antibacterial06841... at 47.31%
17     93aa, >antibacterial06843... at 40.86%
18     93aa, >antibacterial06881... at 43.01%
19     87aa, >antibacterial06885... at 43.68%
20     95aa, >antibacterial06887... at 41.05%
21     92aa, >antibacterial07055... at 43.48%
22     93aa, >antibacterial07110... at 44.09%
23     93aa, >antibacterial07112... at 44.09%
24     93aa, >antibacterial07113... at 41.94%
25     91aa, >antibacterial07212... at 76.92%
26     96aa, >antibacterial07213... *
27     14aa, >antibacterial08314... at 42.86%
28     15aa, >antibacterial08532... at 35.00%
29     22aa, >antibacterial10248... at 45.45%
30     30aa, >antibacterial10736... at 46.67%
31     33aa, >antibacterial10757... at 45.45%

```

```

32    30aa, >antibacterial10759... at 35.00%
33    92aa, >antibacterial11032... at 47.83%
34    25aa, >antibacterial11436... at 44.00%
>Cluster 206
0     131aa, >antibacterial... *
1     15aa, >Gram-... at 35.00%
2     21aa, >antibacterial107459... at 42.86%
>Cluster 207
0     23aa, >anti-Gram+;antifung... at 43.48%
1     26aa, >anti-Gram+;antibact... at 42.31%
2     23aa, >antibacterial;antim... at 43.48%
3     29aa, >antimicrobial... at 41.38%
4     131aa, >Antimicrobial... *
5     31aa, >antibacterial10252... at 45.16%
6     28aa, >antibacterial10262... at 42.86%
>Cluster 208
0     18aa, >antibacterial... at 55.56%
1     131aa, >Antibacterial;Antif... *
2     131aa, >anti-Gram+;antifung... at 44.27%
3     18aa, >antibacterial106545... at 44.44%
4     53aa, >antibacterial107323... at 41.51%
5     18aa, >antibacterial107362... at 50.00%
6     25aa, >antibacterial107415... at 35.00%
7     18aa, >antibacterial109900... at 50.00%
8     35aa, >antibacterial110844... at 45.71%
9     19aa, >antibacterial111661... at 42.11%
>Cluster 209
0     102aa, >Antibacterial... at 40.20%
1     18aa, >anti-Gram+;antibact... at 44.44%
2     123aa, >Antimicrobial... at 45.53%
3     95aa, >anti-Gram-;antifung... at 44.21%
4     98aa, >Antimicrobial... at 45.92%
5     98aa, >anti-Gram+;antifung... at 51.02%
6     97aa, >Antibacterial... at 42.27%
7     131aa, >Antibacterial... *
8     24aa, >antibacterial107806... at 50.00%
9     94aa, >antibacterial109737... at 57.45%
10    24aa, >antibacterial110364... at 50.00%
11    24aa, >antibacterial110367... at 45.83%
12    95aa, >antibacterial110883... at 35.00%
13    80aa, >antibacterial110978... at 47.50%
>Cluster 210
0     74aa, >Antimicrobial... at 68.92%
1     75aa, >Antimicrobial... at 68.00%
2     78aa, >Antimicrobial... at 70.51%
3     74aa, >Antimicrobial... at 63.51%
4     74aa, >Antimicrobial... at 64.86%
5     130aa, >Antimicrobial... *
6     36aa, >Antimicrobial... at 41.67%
7     64aa, >antibacterial106894... at 42.19%
8     64aa, >antibacterial107219... at 40.62%
9     36aa, >antibacterial109629... at 47.22%
10    23aa, >antibacterial109806... at 47.83%
11    28aa, >antibacterial112777... at 42.86%

```

```

>Cluster 211
0      126aa, >Antibacterial... at 46.03%
1      127aa, >Antibacterial... at 51.97%
2      128aa, >Antibacterial... at 53.91%
3      129aa, >Antimicrobial... at 55.81%
4      130aa, >Antibacterial... *
5      50aa, >Antifungal... at 35.00%
6      20aa, >antibacterial12403... at 35.00%
>Cluster 212
0      43aa, >Antibacterial;Antim... at 41.86%
1      107aa, >Antimicrobial... at 49.53%
2      125aa, >Antimicrobial... at 50.40%
3      124aa, >Antimicrobial... at 54.84%
4      128aa, >Antimicrobial... *
5      96aa, >Antimicrobial... at 48.96%
6      18aa, >antibacterial;antif... at 44.44%
7      19aa, >antibacterial07664... at 42.11%
8      18aa, >antibacterial07815... at 44.44%
9      20aa, >antibacterial07920... at 35.00%
10     18aa, >antibacterial08371... at 44.44%
11     20aa, >antibacterial09120... at 35.00%
12     18aa, >antibacterial09618... at 44.44%
13     18aa, >antibacterial09620... at 44.44%
>Cluster 213
0      128aa, >Antimicrobial... *
1      125aa, >Antimicrobial... at 68.80%
2      22aa, >antibacterial11638... at 40.91%
3      20aa, >antibacterial12163... at 50.00%
>Cluster 214
0      13aa, >antimicrobial... at 53.85%
1      23aa, >Antimicrobial... at 43.48%
2      40aa, >antimicrobial... at 35.00%
3      50aa, >anti-Gram+;antibact... at 35.00%
4      104aa, >Antibacterial... at 49.04%
5      92aa, >anti-Gram+;Antibact... at 63.04%
6      128aa, >anti-Gram+... *
7      37aa, >anti-Gram+;antibact... at 43.24%
8      20aa, >antibacterial09111... at 35.00%
9      20aa, >antibacterial09121... at 35.00%
10     20aa, >antibacterial09125... at 35.00%
11     19aa, >antibacterial09979... at 42.11%
12     37aa, >antibacterial10048... at 40.54%
>Cluster 215
0      118aa, >Antibacterial... at 56.78%
1      119aa, >Antibacterial;Antif... at 53.78%
2      119aa, >Antibacterial;Antif... *
3      21aa, >antibacterial;antim... at 42.86%
4      30aa, >antimicrobial... at 46.67%
5      128aa, >Antibacterial;Antif... *
6      13aa, >antibacterial08079... at 53.85%
7      19aa, >antibacterial09147... at 42.11%
>Cluster 216
0      127aa, >Antimicrobial... *
1      72aa, >antibacterial07476... at 66.67%

```

```

2      72aa, >antibacterial07478... *
3      13aa, >antibacterial07566... at 53.85%
4      20aa, >antibacterial08084... at 50.00%
>Cluster 217
0      27aa, >Antifungal... at 40.74%
1      25aa, >antibacterial;Antif... at 44.00%
2      32aa, >Antibacterial;Antif... at 40.62%
3      30aa, >antibacterial06571... *
4      24aa, >antibacterial08257... at 41.67%
5      18aa, >antibacterial08266... at 50.00%
6      17aa, >antibacterial08460... at 47.06%
7      18aa, >antibacterial08616... at 44.44%
8      22aa, >antibacterial09046... at 45.45%
9      13aa, >antibacterial09581... at 46.15%
10     11aa, >antibacterial09939... at 45.45%
11     14aa, >antibacterial10205... at 42.86%
12     13aa, >antibacterial10393... at 46.15%
13     13aa, >antibacterial12058... at 46.15%
14     26aa, >antibacterial12436... at 42.31%
15     15aa, >antibacterial13202... at 46.67%
16     127aa, >antibacterial13426... *
>Cluster 218
0      21aa, >antibacterial;antif... at 52.38%
1      114aa, >anti-Gram+;Antibact... at 62.28%
2      24aa, >antibacterial08396... at 41.67%
3      14aa, >antibacterial08470... at 42.86%
4      23aa, >antibacterial08884... at 43.48%
5      19aa, >antibacterial11457... at 42.11%
6      127aa, >antibacterial13432... *
>Cluster 219
0      25aa, >anti-Gram-;antibact... at 35.00%
1      126aa, >Antimicrobial... *
2      46aa, >antibacterial08983... at 41.30%
3      20aa, >antibacterial09379... at 35.00%
>Cluster 220
0      23aa, >antimicrobial... at 43.48%
1      126aa, >anti-Gram-... *
2      115aa, >Antibacterial... at 72.80%
3      28aa, >antibacterial06642... at 50.00%
4      32aa, >antibacterial07484... at 40.62%
5      18aa, >antibacterial08512... at 44.44%
6      20aa, >antibacterial12931... at 35.00%
>Cluster 221
0      115aa, >Antimicrobial... at 46.09%
1      126aa, >Antimicrobial... *
2      74aa, >antibacterial07475... at 55.41%
3      20aa, >antibacterial12707... at 45.00%
>Cluster 222
0      63aa, >Antibacterial... *
1      63aa, >Antibacterial... at 71.43%
2      59aa, >Antimicrobial... at 67.80%
3      83aa, >Antimicrobial... at 54.22%
4      83aa, >Antimicrobial... at 50.60%
5      83aa, >Antimicrobial... at 53.01%

```

```
6      81aa, >Antimicrobial... at 60.49%
7      84aa, >Antimicrobial... at 60.71%
8      84aa, >Antimicrobial... at 60.71%
9      126aa, >Antimicrobial... *
10     63aa, >Antimicrobial... at 69.84%
11     63aa, >Antimicrobial... at 73.02%
12     103aa, >Antimicrobial... at 48.54%
13     26aa, >antibacterial06680... at 42.31%
14     83aa, >antibacterial06859... at 56.63%
15     26aa, >antibacterial07061... at 50.00%
16     18aa, >antibacterial08053... at 55.56%
17     18aa, >antibacterial09486... at 44.44%
18     13aa, >antibacterial09582... at 46.15%
19     14aa, >antibacterial10198... at 42.86%
20     19aa, >antibacterial112430... at 42.11%
21     26aa, >antibacterial112442... at 50.00%
>Cluster 223
0      40aa, >antibacterial;antim... at 35.00%
1      125aa, >Antimicrobial... *
2      20aa, >anti-Gram+;antibact... at 45.00%
3      28aa, >antibacterial112749... at 42.86%
>Cluster 224
0      57aa, >Antibacterial... at 47.37%
1      30aa, >Anti-Gram-;antibact... at 35.00%
2      88aa, >Antibacterial... at 54.55%
3      88aa, >Antibacterial... at 59.09%
4      125aa, >Antibacterial... *
5      88aa, >Antibacterial... at 54.55%
6      88aa, >Antibacterial... at 55.68%
>Cluster 225
0      28aa, >antimicrobial... at 42.86%
1      29aa, >antimicrobial... at 41.38%
2      29aa, >antimicrobial... at 41.38%
3      120aa, >anti-Gram+;Antimicr... at 64.17%
4      97aa, >anti-Gram+;antifung... at 74.23%
5      30aa, >antibacterial07497... at 46.67%
6      20aa, >antibacterial07552... at 45.00%
7      47aa, >antibacterial110221... at 44.68%
8      19aa, >antibacterial111442... at 42.11%
9      125aa, >antibacterial113423... *
>Cluster 226
0      124aa, >Antimicrobial... *
1      67aa, >Antimicrobial... at 46.27%
2      37aa, >anti-Gram+;antibact... at 40.54%
3      24aa, >antibacterial07069... at 41.67%
4      24aa, >antibacterial08133... at 41.67%
5      17aa, >antibacterial110368... at 41.18%
6      13aa, >antibacterial110471... at 46.15%
7      15aa, >antibacterial111453... at 35.00%
8      13aa, >antibacterial112056... at 46.15%
9      13aa, >antibacterial112981... at 46.15%
>Cluster 227
0      35aa, >antimicrobial... at 35.00%
1      46aa, >antibacterial;Antim... at 47.83%
```

```

2    46aa, >Antibacterial... at 45.65%
3    121aa, >Antimicrobial... at 79.34%
4    124aa, >Antimicrobial... *
5    46aa, >Antimicrobial... at 50.00%
>Cluster 228
0    122aa, >Antibacterial... at 50.82%
1    122aa, >Antibacterial... at 48.36%
2    124aa, >anti-Gram+;Gram-... *
3    118aa, >Antibacterial... at 40.68%
4    21aa, >antimicrobial... at 47.62%
5    121aa, >anti-Gram+;Gram-... at 46.28%
6    121aa, >anti-Gram+;Antibact... at 51.24%
7    122aa, >Antibacterial... at 50.00%
8    122aa, >Antibacterial... at 45.90%
9    12aa, >antibacterial07900... at 41.67%
10   25aa, >antibacterial10299... at 35.00%
11   25aa, >antibacterial10711... at 35.00%
12   19aa, >antibacterial11405... at 47.37%
>Cluster 229
0    87aa, >Antimicrobial... at 42.53%
1    42aa, >Antimicrobial... at 50.00%
2    42aa, >Antimicrobial... at 34.76%
3    104aa, >Antimicrobial... at 45.19%
4    19aa, >anti-Gram+;antibact... at 42.11%
5    53aa, >Antimicrobial... at 52.83%
6    81aa, >Antimicrobial... at 40.74%
7    122aa, >Antimicrobial... at 44.26%
8    123aa, >Antimicrobial... *
9    123aa, >Antimicrobial... at 82.11%
10   123aa, >Antimicrobial... at 81.30%
11   69aa, >Antimicrobial... at 42.03%
12   67aa, >Antimicrobial... at 33.28%
13   123aa, >Antimicrobial... at 40.65%
14   102aa, >anti-Gram-... *
15   100aa, >Antimicrobial... at 81.26%
16   103aa, >Antimicrobial... at 78.35%
17   83aa, >antibacterial07183... at 48.19%
18   32aa, >antibacterial11463... at 46.88%
19   24aa, >antibacterial112448... at 45.83%
20   27aa, >antibacterial112779... at 40.74%
21   15aa, >antibacterial113170... at 33.10%
>Cluster 230
0    39aa, >anti-Gram+;antibact... *
1    29aa, >Gram-... at 41.38%
2    38aa, >anti-Gram+;Gram-... at 68.42%
3    123aa, >anti-Gram+... *
4    31aa, >antibacterial07401... at 41.94%
5    34aa, >antibacterial08561... at 41.18%
6    27aa, >antibacterial110257... at 34.44%
7    18aa, >antibacterial110704... at 34.44%
8    52aa, >antibacterial110825... at 74.62%
9    20aa, >antibacterial111817... at 35.00%
10   21aa, >antibacterial112876... at 37.14%
>Cluster 231

```

```
0    122aa, >Antibacterial... *
1    50aa, >antibacterial;antim... at 42.00%
2    37aa, >anti-Gram+;antibact... at 43.24%
3    23aa, >antimicrobial... at 43.48%
4    14aa, >antibacterial07756... at 42.86%
5    20aa, >antibacterial11320... at 35.00%
6    24aa, >antibacterial11779... at 45.83%
>Cluster 232
0    122aa, >Antimicrobial... *
1    96aa, >Antimicrobial... at 40.62%
2    16aa, >antibacterial12111... at 43.75%
>Cluster 233
0    121aa, >anti-Gram+... *
1    35aa, >anti-Gram+;antibact... at 35.00%
2    12aa, >antibacterial12699... at 41.67%
>Cluster 234
0    32aa, >Antimicrobial... at 46.88%
1    25aa, >Antibacterial;Gram-... at 44.00%
2    32aa, >antimicrobial... at 46.88%
3    37aa, >anti-HIV;antiviral... at 45.95%
4    28aa, >antimicrobial... at 50.00%
5    30aa, >Antimicrobial... at 53.33%
6    30aa, >Antimicrobial... at 53.33%
7    34aa, >antimicrobial... at 44.12%
8    34aa, >antibacterial... at 41.18%
9    29aa, >anti-Gram-;antibact... at 65.52%
10   29aa, >antimicrobial... *
11   31aa, >anti-Gram+;anti-HIV... at 45.16%
12   30aa, >Antimicrobial;Antim... at 80.00%
13   121aa, >Antimicrobial... *
14   27aa, >Antimicrobial... at 44.44%
15   31aa, >antibacterial06486... at 48.39%
16   37aa, >antibacterial07505... at 45.95%
17   30aa, >antibacterial09128... at 83.33%
18   33aa, >antibacterial10751... at 45.45%
19   29aa, >antibacterial11445... at 62.07%
20   25aa, >antibacterial11863... at 35.00%
21   29aa, >antibacterial13221... *
>Cluster 235
0    121aa, >anti-HIV;antiviral... *
1    20aa, >antibacterial07442... at 35.00%
>Cluster 236
0    120aa, >Antimicrobial... *
1    120aa, >Antimicrobial... at 80.00%
2    27aa, >antibacterial09764... at 40.74%
>Cluster 237
0    102aa, >Antimicrobial... at 56.86%
1    106aa, >Antimicrobial... at 59.43%
2    106aa, >Antimicrobial... at 50.94%
3    106aa, >Antimicrobial... at 54.72%
4    27aa, >Antimicrobial... at 44.44%
5    95aa, >Antimicrobial... at 50.53%
6    98aa, >Antimicrobial... at 45.92%
7    115aa, >Antimicrobial... at 58.26%
```

```

8      111aa, >Antimicrobial... at 48.65%
9      113aa, >Antimicrobial... at 57.52%
10     118aa, >Antimicrobial... at 55.93%
11     120aa, >Antimicrobial... *
12     100aa, >Antimicrobial... at 49.00%
13     19aa, >antibacterial08645... at 42.11%
14     23aa, >antibacterial09073... at 47.83%
15     20aa, >antibacterial09393... at 35.00%
16     24aa, >antibacterial09704... at 41.67%
17     20aa, >antibacterial10036... *
18     23aa, >antibacterial12365... at 43.48%
19     27aa, >antibacterial12892... at 44.44%
>Cluster 238
0      83aa, >anti-Gram-... at 46.99%
1      82aa, >Antibacterial... at 42.68%
2      120aa, >Gram-... *
3      22aa, >Gram-... at 40.91%
>Cluster 239
0      36aa, >Antimicrobial... at 72.22%
1      119aa, >Antimicrobial... *
2      50aa, >anti-Gram+;antibact... at 46.00%
3      99aa, >antibacterial06798... at 40.40%
4      19aa, >antibacterial09144... at 47.37%
5      15aa, >antibacterial11588... at 53.33%
>Cluster 240
0      38aa, >Antimicrobial... at 47.37%
1      98aa, >Antimicrobial... at 40.82%
2      104aa, >Antimicrobial... at 40.38%
3      117aa, >Antimicrobial... at 66.67%
4      119aa, >anti-Gram+;Gram-... *
5      87aa, >Antimicrobial... at 57.47%
6      33aa, >antibacterial07590... at 45.45%
7      18aa, >antibacterial08106... at 44.44%
8      14aa, >antibacterial10380... at 42.86%
9      20aa, >antibacterial12889... at 35.00%
10     18aa, >antibacterial13251... at 50.00%
>Cluster 241
0      31aa, >Anti-Gram-... at 41.94%
1      119aa, >Antibacterial... *
2      32aa, >anti-Gram+;antibact... at 40.62%
3      13aa, >antibacterial07015... at 46.15%
4      18aa, >antibacterial07810... at 55.56%
5      32aa, >antibacterial08553... at 40.62%
6      20aa, >antibacterial09301... at 50.00%
7      21aa, >antibacterial09506... at 42.86%
8      18aa, >antibacterial10784... at 44.44%
9      18aa, >antibacterial10785... at 50.00%
10     14aa, >antibacterial10866... at 50.00%
>Cluster 242
0      112aa, >Antimicrobial... at 40.18%
1      21aa, >antibacterial;antim... at 42.86%
2      104aa, >Antimicrobial... at 41.35%
3      36aa, >Gram-... at 47.22%
4      118aa, >Antimicrobial... *

```



```

5      20aa, >antibacterial09387... at 45.00%
6      20aa, >antibacterial12161... at 35.00%
>Cluster 243
0      118aa, >Antimicrobial... *
1      41aa, >Antimicrobial... at 43.90%
2      24aa, >antibacterial12984... at 41.67%
>Cluster 244
0      40aa, >Antimicrobial... at 35.00%
1      117aa, >Antimicrobial... *
2      49aa, >antithrombotic... at 57.14%
3      32aa, >Antimicrobial... at 45.62%
4      29aa, >antibacterial... at 48.28%
5      24aa, >antimicrobial... at 41.67%
6      43aa, >antithrombotic... at 44.42%
7      25aa, >Antimicrobial... *
8      27aa, >antimicrobial... at 40.74%
9      26aa, >antibacterial;antib... at 39.23%
10     39aa, >antimicrobial... at 43.59%
11     29aa, >antimicrobial... at 58.62%
12     67aa, >Antimicrobial... at 44.78%
13     26aa, >antibacterial06551... at 34.62%
14     26aa, >antibacterial06676... at 41.54%
15     70aa, >antibacterial06819... at 48.57%
16     30aa, >antibacterial07058... at 56.67%
17     23aa, >L01A000169... at 56.52%
18     23aa, >antibacterial07961... at 52.17%
19     27aa, >antibacterial07981... at 48.15%
20     30aa, >antibacterial09036... at 56.67%
21     21aa, >antibacterial09471... at 42.86%
22     26aa, >antibacterial10222... at 42.31%
23     29aa, >antibacterial10300... at 44.83%
24     28aa, >antibacterial10301... at 46.43%
25     26aa, >antibacterial10521... *
26     30aa, >antibacterial10733... at 35.00%
27     34aa, >antibacterial10932... at 54.71%
28     37aa, >antibacterial12426... at 43.24%
>Cluster 245
0      117aa, >Antibacterial... *
1      34aa, >antimicrobial... at 41.18%
2      18aa, >antibacterial06540... at 44.44%
3      21aa, >antibacterial08620... at 42.86%
4      21aa, >antibacterial08922... at 42.86%
5      18aa, >antibacterial10705... at 44.44%
6      17aa, >antibacterial10901... at 41.18%
7      16aa, >antibacterial12942... at 43.75%
>Cluster 246
0      24aa, >antimicrobial... at 41.67%
1      117aa, >Gram-... *
2      28aa, >antibacterial08575... at 42.86%
>Cluster 247
0      84aa, >Antibacterial;Antif... at 47.62%
1      115aa, >Antimicrobial... at 47.83%
2      117aa, >Antibacterial;Antif... *
3      92aa, >Antimicrobial... at 61.96%

```

```
4      79aa, >Antibacterial... at 43.04%
5      29aa, >Antimicrobial... at 41.38%
6      11aa, >antibacterial10282... at 45.45%
7      32aa, >antibacterial10880... at 40.62%
8      33aa, >antibacterial11176... at 42.42%
>Cluster 248
0      116aa, >Antibacterial... *
>Cluster 249
0      32aa, >anti-Gram+;antimicr... at 40.62%
1      31aa, >antimicrobial... at 41.94%
2      28aa, >antimicrobial... at 42.86%
3      115aa, >Antimicrobial... *
4      111aa, >Antimicrobial... at 61.26%
5      111aa, >Antimicrobial... at 62.16%
6      13aa, >antibacterial10843... at 46.15%
>Cluster 250
0      91aa, >Antimicrobial... at 82.42%
1      84aa, >Antimicrobial... *
2      115aa, >Antimicrobial... *
3      91aa, >Antimicrobial... at 42.86%
4      91aa, >Antimicrobial... at 60.44%
5      91aa, >anti-Gram+;antifung... at 58.24%
6      88aa, >Antimicrobial... at 56.82%
7      98aa, >Antimicrobial... at 60.20%
8      21aa, >antibacterial107847... at 42.86%
>Cluster 251
0      114aa, >anti-HIV;antiviral... *
1      14aa, >antibacterial109895... at 42.86%
>Cluster 252
0      42aa, >Antibacterial... at 42.86%
1      114aa, >Antimicrobial... *
2      111aa, >Antimicrobial... at 80.99%
3      108aa, >Antimicrobial... at 76.74%
>Cluster 253
0      114aa, >Antifungal... *
1      95aa, >antibacterial110813... at 45.26%
>Cluster 254
0      114aa, >Antibacterial... *
1      28aa, >antibacterial106500... at 42.86%
2      16aa, >antibacterial112617... at 43.75%
>Cluster 255
0      45aa, >antibacterial;Antif... at 35.00%
1      47aa, >Antibacterial;Antif... at 40.43%
2      26aa, >Antibacterial;Antif... at 46.15%
3      34aa, >antibacterial;antim... at 44.12%
4      30aa, >anti-Gram+;Antibact... at 43.33%
5      113aa, >Antimicrobial... *
6      108aa, >Antimicrobial... at 79.63%
7      20aa, >Antibacterial... at 35.00%
8      29aa, >antibacterial;antim... at 41.38%
9      18aa, >antibacterial108267... *
10     18aa, >antibacterial108679... at 44.44%
11     18aa, >antibacterial109485... at 44.44%
12     11aa, >antibacterial109820... at 45.45%
```

```

13    24aa, >antibacterial10003... at 41.67%
14    28aa, >antibacterial10310... at 42.86%
15    21aa, >antibacterial10898... at 42.86%
16    28aa, >antibacterial12972... at 42.86%
>Cluster 256
0     20aa, >antimicrobial... at 35.00%
1     27aa, >antimicrobial... at 44.44%
2     24aa, >Antimicrobial... at 41.67%
3     19aa, >anti-Gram+;Antibact... at 42.11%
4     30aa, >antimicrobial... at 35.00%
5     87aa, >Antimicrobial... at 50.57%
6     112aa, >Antimicrobial... *
7     29aa, >anti-Gram+;antimicr... at 44.83%
8     18aa, >antibacterial11948... at 44.44%
>Cluster 257
0     112aa, >Antibacterial... *
>Cluster 258
0     44aa, >Antimicrobial... at 65.91%
1     88aa, >Antimicrobial... at 45.45%
2     50aa, >Antimicrobial... *
3     111aa, >Antimicrobial... *
4     44aa, >Antimicrobial... at 56.82%
5     49aa, >Antimicrobial... at 40.82%
6     19aa, >anti-Gram-;antibact... at 42.11%
7     81aa, >Antimicrobial... at 40.74%
8     72aa, >Antimicrobial... at 43.06%
9     73aa, >Antimicrobial... at 41.10%
10    73aa, >Antimicrobial... at 43.84%
11    72aa, >Antimicrobial... at 40.28%
12    73aa, >Antimicrobial... at 42.47%
13    72aa, >Antimicrobial... at 41.67%
14    72aa, >Antimicrobial... at 40.28%
15    54aa, >Antimicrobial... at 77.78%
16    19aa, >antibacterial... at 42.11%
17    52aa, >Antimicrobial... at 57.69%
18    42aa, >Antimicrobial... at 52.38%
19    18aa, >antibacterial07409... at 44.44%
20    18aa, >antibacterial07413... at 44.44%
21    39aa, >antibacterial07904... *
22    39aa, >antibacterial07906... at 58.97%
23    18aa, >antibacterial08076... at 61.11%
24    17aa, >antibacterial08241... at 41.18%
25    22aa, >antibacterial10186... at 59.09%
26    23aa, >antibacterial10878... at 47.83%
27    72aa, >antibacterial11068... at 43.06%
>Cluster 259
0     21aa, >antimicrobial... at 47.62%
1     110aa, >Antibacterial... at 75.45%
2     111aa, >Antimicrobial... *
3     36aa, >Antibacterial;Antim... at 41.67%
4     90aa, >Antimicrobial... at 80.00%
5     88aa, >antibacterial06559... at 62.50%
>Cluster 260
0     44aa, >Antimicrobial... at 40.91%

```

```

1    40aa, >Antimicrobial... at 35.00%
2    39aa, >antimicrobial... at 43.59%
3    40aa, >antibacterial;antim... at 42.50%
4    39aa, >Antimicrobial... at 46.15%
5    40aa, >anti-Gram+;antibact... at 42.50%
6    39aa, >Antimicrobial... at 48.72%
7    46aa, >anti-Gram+;antibact... at 45.65%
8    40aa, >antimicrobial... at 45.00%
9    40aa, >antimicrobial... at 35.00%
10   24aa, >antibacterial;Antif... at 41.67%
11   40aa, >Antibacterial;antim... at 50.00%
12   43aa, >Antibacterial;antim... at 44.19%
13   29aa, >anti-Gram+;Antibact... at 41.38%
14   36aa, >antimicrobial;Antim... at 41.67%
15   36aa, >antimicrobial;Antim... at 44.44%
16   111aa, >Antimicrobial... *
17   29aa, >Antimicrobial;Antiv... at 41.38%
18   42aa, >antifungal;antimicr... at 40.48%
19   29aa, >Antibacterial... *
20   39aa, >Antimicrobial... at 46.15%
21   40aa, >Antimicrobial... at 47.50%
22   51aa, >Antimicrobial... at 41.18%
23   43aa, >antibacterial107546... at 41.86%
24   40aa, >antibacterial10748... at 42.50%
>Cluster 261
0    51aa, >Antibacterial... at 66.67%
1    24aa, >antibacterial;Antif... at 41.67%
2    51aa, >Antibacterial... at 66.67%
3    42aa, >antimicrobial... at 40.48%
4    52aa, >Antibacterial... at 65.38%
5    111aa, >Antibacterial... *
6    25aa, >antibacterial;antim... at 48.00%
7    52aa, >Antibacterial... at 73.08%
8    26aa, >antibacterial10839... at 42.31%
9    31aa, >antibacterial11438... at 45.16%
>Cluster 262
0    111aa, >antibacterial13427... *
>Cluster 263
0    110aa, >Antimicrobial... *
>Cluster 264
0    30aa, >anti-Gram+... at 35.00%
1    110aa, >Antimicrobial... *
2    18aa, >antibacterial112789... at 44.44%
>Cluster 265
0    93aa, >Gram-... at 43.01%
1    38aa, >Antibacterial... at 42.11%
2    91aa, >anti-Gram+;Gram-... at 69.23%
3    109aa, >Antimicrobial... *
4    13aa, >antimicrobial... at 46.15%
>Cluster 266
0    108aa, >Antifungal... *
1    40aa, >anti-Gram+;anti-HIV... at 87.50%
2    19aa, >antibacterial112943... at 42.11%
>Cluster 267

```

```

0      108aa, >Antibacterial... *
1      18aa, >antibacterial08074... at 44.44%
>Cluster 268
0      27aa, >antimicrobial... at 40.74%
1      24aa, >anti-Gram+;antibact... at 41.67%
2      26aa, >antimicrobial... at 42.31%
3      108aa, >Antimicrobial... *
4      105aa, >Antimicrobial... at 69.52%
5      31aa, >antibacterial07387... at 41.94%
6      25aa, >antibacterial08004... *
7      26aa, >antibacterial08007... at 78.00%
8      26aa, >antibacterial08009... at 78.00%
9      24aa, >antibacterial08011... at 80.00%
10     20aa, >antibacterial11566... at 35.00%
>Cluster 269
0      43aa, >Antimicrobial... at 41.86%
1      62aa, >Antimicrobial... at 72.58%
2      62aa, >Antibacterial... at 74.19%
3      37aa, >anti-Gram-;antibact... at 64.86%
4      31aa, >antimicrobial... at 41.94%
5      35aa, >Antimicrobial... *
6      35aa, >Antimicrobial... at 80.00%
7      108aa, >Antibacterial... *
8      68aa, >antibacterial06893... at 57.35%
9      52aa, >antibacterial07295... at 71.15%
10     24aa, >antibacterial110946... at 41.67%
11     80aa, >antibacterial111038... at 78.75%
12     29aa, >antibacterial113027... at 41.38%
>Cluster 270
0      107aa, >Antibacterial... *
1      30aa, >Antibacterial... at 35.00%
>Cluster 271
0      18aa, >antibacterial... at 44.44%
1      24aa, >antimicrobial... at 45.83%
2      107aa, >Antimicrobial... *
>Cluster 272
0      24aa, >antimicrobial... at 41.67%
1      107aa, >Antimicrobial... *
2      20aa, >antibacterial07921... at 45.00%
3      23aa, >antibacterial07925... at 43.48%
4      25aa, >antibacterial111431... at 35.00%
5      20aa, >antibacterial112612... at 35.00%
6      18aa, >antibacterial112849... at 44.44%
>Cluster 273
0      57aa, >anti-Gram+;anti-HIV... at 47.37%
1      16aa, >antimicrobial... at 56.25%
2      16aa, >antibacterial06607... at 43.75%
3      107aa, >antibacterial113428... *
>Cluster 274
0      26aa, >antimicrobial... at 42.31%
1      77aa, >Antimicrobial... at 48.05%
2      75aa, >Antimicrobial... at 35.00%
3      78aa, >Antimicrobial... at 53.85%
4      78aa, >Antimicrobial... at 50.00%

```

```

5    42aa, >Antimicrobial... at 80.95%
6    92aa, >Antimicrobial... at 44.57%
7    94aa, >Antimicrobial... at 50.00%
8    106aa, >Antimicrobial... *
9    96aa, >Antimicrobial... at 42.71%
10   40aa, >Antimicrobial... at 35.00%
11   41aa, >anti-Gram-... at 58.54%
12   77aa, >Antimicrobial... at 40.26%
13   11aa, >antimicrobial... at 45.45%
14   43aa, >Antimicrobial... at 53.49%
15   60aa, >Antimicrobial... at 45.00%
16   44aa, >Antimicrobial... *
17   65aa, >Antimicrobial... at 41.54%
18   41aa, >antibacterial07235... at 63.41%
19   46aa, >antibacterial12664... at 73.91%
>Cluster 275
0    106aa, >anti-Gram+... *
>Cluster 276
0    102aa, >Antimicrobial... *
1    64aa, >Antimicrobial... at 42.19%
2    77aa, >Antimicrobial... at 72.73%
3    63aa, >Antimicrobial... at 65.08%
4    76aa, >Antimicrobial... at 36.84%
5    78aa, >Antimicrobial... at 48.72%
6    105aa, >Antimicrobial... *
7    75aa, >Antimicrobial... at 35.00%
8    77aa, >Antimicrobial... at 83.12%
9    77aa, >Antimicrobial... at 81.82%
10   77aa, >Antimicrobial... *
11   77aa, >Antimicrobial... at 84.42%
12   77aa, >Antimicrobial... at 81.82%
13   77aa, >Antimicrobial... at 83.12%
14   77aa, >Antimicrobial... at 79.22%
15   77aa, >Antimicrobial... at 84.42%
16   77aa, >Antimicrobial... at 85.71%
17   59aa, >Antimicrobial... *
18   59aa, >Antimicrobial... at 80.14%
19   76aa, >Antimicrobial... at 82.89%
20   75aa, >Antimicrobial... *
21   76aa, >Antimicrobial... at 84.21%
22   77aa, >antibacterial07256... at 80.52%
23   11aa, >antibacterial09335... at 45.45%
24   81aa, >antibacterial11093... at 66.67%
25   77aa, >antibacterial11094... *
>Cluster 277
0    24aa, >Antifungal;Antimicr... at 41.67%
1    82aa, >anti-Gram+;Antibact... *
2    102aa, >Antimicrobial... at 78.43%
3    67aa, >Antimicrobial... at 40.30%
4    104aa, >Antimicrobial... *
5    104aa, >Antimicrobial... at 74.04%
6    66aa, >Antibacterial;Antif... at 42.42%
7    25aa, >antibacterial;antif... at 35.00%
8    13aa, >antimicrobial... at 31.54%

```

```

9      55aa, >anti-Gram+;Antibact... at 41.82%
>Cluster 278
0      104aa, >Antimicrobial... *
1      21aa, >Antimicrobial... at 37.62%
2      13aa, >antibacterial10851... at 53.85%
3      18aa, >antibacterial13103... at 44.44%
>Cluster 279
0      104aa, >Antimicrobial... *
1      23aa, >antibacterial11791... at 43.48%
>Cluster 280
0      23aa, >anti-Gram+;antibact... at 43.48%
1      23aa, >anti-Gram+;antimicr... at 43.48%
2      104aa, >anti-Gram+;Antibact... *
3      15aa, >antibacterial13253... at 35.00%
>Cluster 281
0      103aa, >Antimicrobial... *
1      96aa, >Antimicrobial... at 62.50%
2      18aa, >antibacterial06536... at 44.44%
3      29aa, >antibacterial07844... at 41.38%
>Cluster 282
0      103aa, >Antimicrobial... *
>Cluster 283
0      84aa, >Antimicrobial... at 52.38%
1      49aa, >Antimicrobial... at 42.86%
2      103aa, >Antimicrobial... *
3      61aa, >Antimicrobial... at 40.98%
4      75aa, >Antimicrobial... at 46.67%
5      75aa, >Antimicrobial... at 41.33%
6      13aa, >antimicrobial... at 46.15%
7      27aa, >antibacterial06679... at 40.74%
8      35aa, >antibacterial07439... at 35.00%
9      29aa, >antibacterial110307... at 41.38%
10     39aa, >antibacterial112618... at 41.03%
>Cluster 284
0      37aa, >anti-Gram+;antibact... at 43.24%
1      19aa, >anti-Gram+;antibact... at 42.11%
2      20aa, >anti-Gram+;antibact... at 45.00%
3      103aa, >Antimicrobial... *
4      103aa, >Antimicrobial... at 77.67%
5      101aa, >Antimicrobial... at 64.36%
6      31aa, >antibacterial... at 77.42%
7      22aa, >antimicrobial... at 40.91%
8      22aa, >antimicrobial... at 40.91%
9      18aa, >antibacterial07410... at 44.44%
10     19aa, >antibacterial07411... at 42.11%
11     36aa, >antibacterial07550... at 58.33%
12     18aa, >antibacterial07812... *
13     18aa, >antibacterial08411... at 44.44%
14     22aa, >antibacterial08416... at 40.91%
15     19aa, >antibacterial09550... at 44.44%
16     19aa, >antibacterial09714... at 44.44%
17     13aa, >antibacterial13292... at 46.15%
>Cluster 285
0      43aa, >Antibacterial;antim... at 65.12%

```

```

1    45aa, >Antibacterial;Antim... at 42.22%
2    42aa, >Antibacterial;Antim... at 76.19%
3    48aa, >Antimicrobial... at 43.75%
4    27aa, >Antimicrobial... at 40.74%
5    103aa, >Antibacterial... *
6    85aa, >Antibacterial... at 80.59%
7    22aa, >antibacterial06592... at 40.91%
8    92aa, >antibacterial06814... at 47.83%
9    43aa, >antibacterial07547... at 62.79%
10   24aa, >antibacterial07665... at 41.67%
>Cluster 286
0    27aa, >antimicrobial... at 44.44%
1    103aa, >anti-Gram-... *
2    28aa, >antibacterial07065... at 42.86%
3    24aa, >antibacterial09879... at 41.67%
4    15aa, >antibacterial10168... at 35.00%
5    37aa, >antibacterial12390... at 45.95%
>Cluster 287
0    73aa, >anti-Gram+;Antibact... at 47.95%
1    73aa, >anti-Gram+;Antibact... at 42.47%
2    73aa, >anti-Gram+;Antibact... at 42.47%
3    20aa, >Antifungal;antivira... at 45.00%
4    18aa, >Antimicrobial... at 44.44%
5    28aa, >antibacterial06691... at 42.86%
6    103aa, >antibacterial13425... *
>Cluster 288
0    100aa, >anti-Gram+... at 64.00%
1    102aa, >Antibacterial... *
2    98aa, >anti-Gram+;Antimicr... at 89.14%
>Cluster 289
0    102aa, >Antimicrobial... *
1    41aa, >anti-Gram+;antibact... at 41.46%
>Cluster 290
0    24aa, >antimicrobial... at 41.67%
1    46aa, >anti-Gram+;Antibact... at 41.30%
2    46aa, >antimicrobial... at 41.30%
3    102aa, >Antimicrobial... *
4    102aa, >Antimicrobial... at 75.49%
5    32aa, >antibacterial08494... at 40.62%
6    26aa, >antibacterial09001... at 42.31%
7    30aa, >antibacterial10610... at 43.33%
>Cluster 291
0    25aa, >anti-Gram+;antibact... at 35.00%
1    78aa, >Antimicrobial... at 64.10%
2    85aa, >Antimicrobial... at 55.29%
3    93aa, >Antimicrobial... at 67.74%
4    57aa, >Antimicrobial... at 50.88%
5    62aa, >Antimicrobial... at 40.32%
6    64aa, >Antimicrobial... at 42.19%
7    67aa, >Antimicrobial... at 52.24%
8    66aa, >Antimicrobial... at 50.00%
9    81aa, >Antimicrobial... at 50.62%
10   68aa, >Antimicrobial... at 60.29%
11   71aa, >Antimicrobial... at 56.34%

```



```

12    71aa, >Antimicrobial... at 64.79%
13    74aa, >Antimicrobial... *
14    102aa, >Antimicrobial... *
15    30aa, >antibacterial13299... at 35.00%
>Cluster 292
0     101aa, >anti-Gram-;antibact... *
1     19aa, >antibacterial08579... at 42.11%
2     13aa, >antibacterial09216... at 46.15%
3     13aa, >antibacterial09219... at 46.15%
4     21aa, >antibacterial09296... at 71.43%
5     21aa, >antibacterial09302... at 47.62%
6     19aa, >antibacterial09303... at 47.37%
7     14aa, >antibacterial10203... at 50.00%
>Cluster 293
0     22aa, >anti-Gram+;antibact... at 40.91%
1     101aa, >anti-HIV;antiviral... *
>Cluster 294
0     45aa, >Antimicrobial... at 42.22%
1     41aa, >antifungal;antimicr... at 41.46%
2     43aa, >Antibacterial;antim... at 41.86%
3     43aa, >Antimicrobial... *
4     43aa, >anti-Gram+;antibact... at 53.49%
5     43aa, >Antimicrobial... at 51.16%
6     43aa, >Antibacterial... at 53.49%
7     43aa, >Antimicrobial... at 51.16%
8     40aa, >antimicrobial... at 57.50%
9     45aa, >Antimicrobial... at 55.56%
10    43aa, >Antibacterial... at 53.49%
11    40aa, >antimicrobial... at 57.50%
12    48aa, >Antimicrobial... at 47.92%
13    37aa, >Antimicrobial... at 40.54%
14    38aa, >Antimicrobial... at 42.11%
15    23aa, >antimicrobial... at 43.48%
16    42aa, >Antimicrobial... at 52.38%
17    47aa, >antifungal;antimicr... at 42.55%
18    101aa, >Antimicrobial... *
19    101aa, >Antimicrobial... at 72.28%
20    97aa, >Antimicrobial... at 42.27%
21    52aa, >anti-Gram+;Antibact... at 57.69%
22    47aa, >antifungal;antimicr... at 40.43%
23    32aa, >Antimicrobial... at 46.88%
24    43aa, >Antimicrobial... at 60.47%
25    51aa, >Antimicrobial... at 70.59%
26    51aa, >Antimicrobial... *
27    51aa, >Antimicrobial... at 72.55%
28    43aa, >Antimicrobial... at 62.79%
29    42aa, >Antimicrobial... at 57.14%
30    52aa, >anti-Gram+;Antibact... *
31    28aa, >antibacterial... at 42.86%
32    94aa, >antibacterial06811... at 43.62%
33    97aa, >antibacterial06812... at 43.30%
34    79aa, >antibacterial06817... at 41.77%
35    84aa, >antibacterial06857... at 41.67%
36    94aa, >antibacterial06866... at 40.43%

```

```

37 57aa, >antibacterial06953... at 47.37%
38 79aa, >antibacterial07226... at 44.30%
39 96aa, >antibacterial07249... at 59.38%
40 43aa, >antibacterial07544... *
41 43aa, >antibacterial07545... at 58.14%
42 43aa, >antibacterial10745... at 46.51%
43 45aa, >antibacterial10746... at 42.22%
44 41aa, >antibacterial10747... at 53.66%
45 40aa, >antibacterial10749... at 45.00%
46 65aa, >antibacterial10884... at 52.31%
47 95aa, >antibacterial11007... at 58.95%
48 98aa, >antibacterial11084... at 40.82%
49 99aa, >antibacterial11087... at 40.40%
50 21aa, >antibacterial112647... at 47.62%
>Cluster 295
0 25aa, >Antimicrobial... at 35.00%
1 101aa, >Antimicrobial... *
2 28aa, >antibacterial07570... at 42.86%
3 18aa, >antibacterial08892... at 44.44%
4 21aa, >antibacterial09348... at 42.86%
5 39aa, >antibacterial112721... at 43.59%
>Cluster 296
0 94aa, >Antimicrobial... at 50.00%
1 94aa, >Antimicrobial... at 44.68%
2 97aa, >Antimicrobial... at 46.39%
3 101aa, >Antimicrobial... *
4 101aa, >Antimicrobial... at 74.26%
5 94aa, >Antimicrobial... at 52.13%
6 94aa, >Antimicrobial... at 45.74%
7 93aa, >Antimicrobial... at 45.16%
8 94aa, >Antimicrobial... at 47.87%
9 94aa, >Antimicrobial... at 51.06%
10 94aa, >Antimicrobial... at 46.81%
11 94aa, >Antimicrobial... at 44.68%
12 94aa, >Antimicrobial... at 44.68%
13 84aa, >Antimicrobial... at 41.67%
14 94aa, >Antimicrobial... at 75.53%
15 100aa, >Antimicrobial... at 44.00%
16 94aa, >Antimicrobial... at 51.06%
17 100aa, >Antimicrobial... at 47.00%
18 100aa, >Antimicrobial... at 46.00%
19 100aa, >Antimicrobial... at 44.00%
20 96aa, >Antimicrobial... at 83.33%
21 81aa, >Antimicrobial... *
22 27aa, >antibacterial;antim... at 44.44%
23 27aa, >antimicrobial... at 40.74%
24 34aa, >antimicrobial... at 44.12%
25 59aa, >antibacterial06467... at 47.46%
26 43aa, >antibacterial07182... at 46.51%
27 88aa, >antibacterial07194... at 45.45%
28 76aa, >antibacterial07195... at 46.05%
29 76aa, >antibacterial07196... at 46.05%
30 87aa, >antibacterial07197... at 45.98%
31 94aa, >antibacterial07199... at 43.62%

```

32 94aa, >antibacterial07200... at 45.74%  
33 95aa, >antibacterial07201... at 44.21%  
34 95aa, >antibacterial07202... at 35.00%  
35 93aa, >antibacterial07208... at 44.09%  
36 94aa, >antibacterial07209... at 43.62%  
37 94aa, >antibacterial07210... at 47.87%  
38 94aa, >antibacterial07211... at 48.94%  
39 34aa, >antibacterial07488... at 47.06%  
40 21aa, >antibacterial10076... at 47.62%  
41 12aa, >antibacterial10512... at 41.67%  
42 30aa, >antibacterial10735... \*  
43 76aa, >antibacterial11083... at 44.74%  
44 94aa, >antibacterial11085... at 50.00%  
45 97aa, >antibacterial11086... at 49.48%  
46 20aa, >antibacterial11888... at 35.00%  
47 15aa, >antibacterial12008... at 35.00%  
48 22aa, >antibacterial12010... at 40.91%

>Cluster 297

0 27aa, >Antifungal;antimicr... at 40.74%  
1 37aa, >antimicrobial... at 40.54%  
2 101aa, >Antimicrobial... \*  
3 30aa, >antibacterial11353... at 35.00%  
4 101aa, >antibacterial13424... at 78.22%

>Cluster 298

0 100aa, >Antimicrobial... \*  
1 100aa, >Antimicrobial... at 86.00%  
2 96aa, >Antimicrobial... at 53.12%  
3 96aa, >Antimicrobial... at 58.33%  
4 96aa, >Antimicrobial... at 56.25%  
5 96aa, >Antimicrobial... at 56.25%  
6 100aa, >Antimicrobial... at 82.00%  
7 96aa, >Antimicrobial... at 84.38%  
8 100aa, >Antimicrobial... at 69.00%  
9 100aa, >Antimicrobial... at 69.00%  
10 99aa, >Antimicrobial... at 80.00%  
11 98aa, >Antimicrobial... at 82.00%  
12 101aa, >Antimicrobial... at 69.00%  
13 102aa, >Antimicrobial... at 83.00%  
14 100aa, >Antimicrobial... at 69.00%  
15 78aa, >Antimicrobial... at 85.00%  
16 80aa, >Antimicrobial... at 80.00%  
17 103aa, >Antimicrobial... \*  
18 96aa, >Antimicrobial... at 81.00%  
19 105aa, >Antimicrobial... at 83.00%  
20 40aa, >antimicrobial... at 67.50%  
21 40aa, >antimicrobial... \*  
22 40aa, >antibacterial06583... at 55.00%  
23 96aa, >antibacterial06807... at 55.21%  
24 19aa, >antibacterial08547... \*  
25 28aa, >antibacterial09527... at 42.86%

>Cluster 299

0 26aa, >antimicrobial... at 42.31%  
1 51aa, >Antimicrobial... at 62.16%  
2 51aa, >Antimicrobial... \*

```

3      51aa, >Antimicrobial... at 60.78%
4      51aa, >Antibacterial;Antim... at 66.67%
5      51aa, >Antimicrobial... at 66.67%
6      43aa, >Antimicrobial... at 55.81%
7      35aa, >Antimicrobial;Antim... at 42.86%
8      78aa, >Antimicrobial... at 83.59%
9      78aa, >Antimicrobial... *
10     78aa, >Antimicrobial... at 84.62%
11     79aa, >Antimicrobial... at 60.76%
12     63aa, >Antimicrobial... at 60.32%
13     41aa, >Antimicrobial... at 41.46%
14     100aa, >Antimicrobial... *
15     78aa, >Antimicrobial... at 75.64%
16     42aa, >Antimicrobial... at 42.86%
17     34aa, >Antimicrobial... at 76.47%
18     85aa, >antibacterial06861... at 58.82%
19     63aa, >antibacterial07143... at 53.97%
20     35aa, >antibacterial07487... at 35.00%
21     79aa, >antibacterial11092... at 64.56%
>Cluster 300
0      99aa, >anti-Gram-;Antibact... *
1      95aa, >anti-Gram+;Gram-... at 42.11%
2      23aa, >Antimicrobial... at 43.48%
3      80aa, >anti-Gram-;Antibact... at 46.25%
4      16aa, >antibacterial08866... at 43.75%
5      98aa, >antibacterial10045... at 40.82%
6      24aa, >antibacterial10366... *
>Cluster 301
0      62aa, >Antibacterial;Antim... at 45.16%
1      62aa, >Antibacterial... at 51.61%
2      99aa, >Antimicrobial... *
3      66aa, >Antimicrobial... at 59.09%
4      64aa, >Antimicrobial... at 64.06%
5      65aa, >Antimicrobial... at 58.46%
6      66aa, >Antimicrobial... at 62.12%
7      56aa, >Antimicrobial... at 67.86%
8      66aa, >Antimicrobial... at 59.09%
9      66aa, >Antimicrobial... at 56.06%
10     58aa, >Antimicrobial... *
11     77aa, >Antimicrobial... at 54.55%
12     82aa, >antibacterial06830... at 43.90%
13     18aa, >antibacterial13002... at 44.44%
>Cluster 302
0      99aa, >anti-Gram+;Gram-... *
>Cluster 303
0      47aa, >Antimicrobial... at 61.70%
1      45aa, >Antimicrobial... at 80.00%
2      40aa, >Antimicrobial... at 35.00%
3      84aa, >Antimicrobial... at 58.33%
4      69aa, >Antimicrobial... *
5      99aa, >Antimicrobial... *
6      83aa, >Antimicrobial... at 44.58%
7      67aa, >Antimicrobial... at 59.70%
8      67aa, >Antimicrobial... at 61.19%

```

9 83aa, >Antimicrobial... at 49.40%  
10 89aa, >Antimicrobial... at 47.19%  
11 69aa, >Antimicrobial... at 52.32%  
12 63aa, >Antimicrobial... at 60.32%  
13 20aa, >antimicrobial... at 35.00%  
14 37aa, >Antimicrobial... at 59.46%  
15 48aa, >Antimicrobial... at 60.42%  
16 40aa, >Antimicrobial... at 37.50%  
17 47aa, >Antimicrobial... at 70.21%  
18 48aa, >Antimicrobial... at 64.58%  
19 45aa, >Antimicrobial... \*  
20 67aa, >antibacterial06874... at 53.73%  
21 18aa, >antibacterial09719... at 34.44%  
22 67aa, >antibacterial11009... at 53.73%  
23 98aa, >antibacterial11013... at 68.37%  
24 66aa, >antibacterial11018... at 56.06%  
25 69aa, >antibacterial11019... at 62.32%  
26 69aa, >antibacterial11020... at 68.12%

>Cluster 304

0 21aa, >Antimicrobial... at 52.38%  
1 42aa, >Antibacterial... \*  
2 50aa, >Antimicrobial... at 50.00%  
3 82aa, >Antimicrobial... at 47.56%  
4 82aa, >Antimicrobial... at 31.46%  
5 85aa, >Antimicrobial... at 30.00%  
6 83aa, >Antimicrobial... at 30.96%  
7 86aa, >Antimicrobial... at 41.86%  
8 87aa, >Antimicrobial... at 41.38%  
9 89aa, >Antimicrobial... at 43.82%  
10 90aa, >Antimicrobial... at 35.00%  
11 21aa, >Antimicrobial... at 47.62%  
12 86aa, >Antimicrobial... at 40.70%  
13 65aa, >Antimicrobial... at 35.00%  
14 99aa, >Antibacterial... \*  
15 42aa, >Antimicrobial... at 32.86%  
16 59aa, >Antimicrobial... at 34.07%  
17 84aa, >antibacterial06741... at 30.48%  
18 29aa, >antibacterial08554... at 41.38%  
19 16aa, >antibacterial09944... at 56.25%  
20 29aa, >antibacterial110371... at 41.38%  
21 81aa, >antibacterial11014... at 40.74%

>Cluster 305

0 33aa, >antimicrobial... at 42.42%  
1 33aa, >Antimicrobial... at 42.42%  
2 99aa, >Antimicrobial... \*  
3 89aa, >Antimicrobial... at 57.30%  
4 90aa, >Antimicrobial... at 50.00%  
5 24aa, >antibacterial09473... at 45.83%  
6 31aa, >antibacterial110606... at 41.94%

>Cluster 306

0 99aa, >Antibacterial... \*  
1 13aa, >antibacterial113011... at 53.85%  
2 26aa, >antibacterial113033... at 46.15%

>Cluster 307

```

0      66aa, >Antimicrobial... *
1      66aa, >Antimicrobial... at 80.30%
2      66aa, >Antimicrobial... at 68.18%
3      66aa, >Antimicrobial... at 51.52%
4      67aa, >Antimicrobial... at 40.30%
5      66aa, >Antimicrobial... at 42.42%
6      67aa, >Antimicrobial... at 59.70%
7      75aa, >antibacterial06514... at 61.33%
8      99aa, >antibacterial06588... *
9      97aa, >antibacterial06708... at 46.39%
10     84aa, >antibacterial06719... at 57.14%
11     77aa, >antibacterial06792... at 61.04%
12     70aa, >antibacterial07321... at 42.86%
13     78aa, >antibacterial07496... at 61.54%
14     20aa, >antibacterial07677... at 45.00%
15     18aa, >antibacterial07908... at 50.00%
16     20aa, >antibacterial09113... at 35.00%
17     25aa, >antibacterial12798... at 35.00%
>Cluster 308
0      37aa, >Antimicrobial... at 40.54%
1      41aa, >Antibacterial;Antif... at 41.46%
2      64aa, >Antimicrobial... at 46.88%
3      66aa, >anti-Gram+;antifung... *
4      79aa, >anti-Gram+;Gram-... *
5      66aa, >Antimicrobial... at 45.45%
6      66aa, >anti-Gram+;antifung... at 40.91%
7      66aa, >Antimicrobial... at 71.21%
8      74aa, >antibacterial06441... at 60.81%
9      76aa, >antibacterial06448... at 68.42%
10     36aa, >antibacterial06506... at 41.67%
11     66aa, >antibacterial06573... at 81.82%
12     62aa, >antibacterial06628... at 51.61%
13     76aa, >antibacterial06703... at 73.68%
14     96aa, >antibacterial06721... at 46.88%
15     94aa, >antibacterial06722... at 53.19%
16     99aa, >antibacterial06740... *
17     98aa, >antibacterial06839... at 40.82%
18     88aa, >antibacterial06844... at 43.18%
19     93aa, >antibacterial06848... at 46.24%
20     95aa, >antibacterial06850... at 46.32%
21     90aa, >antibacterial06858... at 35.00%
22     90aa, >antibacterial06912... at 68.89%
23     59aa, >antibacterial06951... at 42.37%
24     75aa, >antibacterial07083... at 73.33%
25     94aa, >antibacterial07106... at 47.87%
26     54aa, >antibacterial07253... at 72.22%
27     80aa, >antibacterial07592... at 55.00%
>Cluster 309
0      99aa, >antibacterial10741... *
1      40aa, >antibacterial11938... at 35.00%
>Cluster 310
0      79aa, >anti-Gram+;Gram-... at 59.49%
1      99aa, >antibacterial10903... *
>Cluster 311

```

```

0      98aa, >antibacterial... *
1      23aa, >antibacterial08215... at 43.48%
2      41aa, >antibacterial08459... at 41.46%
>Cluster 312
0      98aa, >Antimicrobial... *
1      77aa, >anti-Gram+;Antibact... at 82.21%
2      16aa, >antibacterial08413... at 43.75%
>Cluster 313
0      56aa, >Antimicrobial... at 44.64%
1      54aa, >Antimicrobial... at 51.85%
2      35aa, >Antimicrobial... *
3      41aa, >Antimicrobial... at 48.78%
4      95aa, >Antimicrobial... at 47.37%
5      89aa, >Antimicrobial... at 52.81%
6      90aa, >Antimicrobial... at 60.00%
7      90aa, >Antimicrobial... at 64.44%
8      90aa, >Antimicrobial... at 63.33%
9      90aa, >Antimicrobial... at 56.67%
10     90aa, >Antimicrobial... at 62.22%
11     90aa, >Antimicrobial... at 64.44%
12     98aa, >Antimicrobial... *
13     85aa, >Antimicrobial... at 45.88%
14     90aa, >Antimicrobial... at 62.22%
15     88aa, >Antimicrobial... at 60.23%
16     88aa, >Antimicrobial... at 61.36%
17     90aa, >Antimicrobial... at 57.78%
18     93aa, >Antimicrobial... at 47.31%
19     89aa, >Antimicrobial... at 40.45%
20     89aa, >Antimicrobial... at 42.70%
21     83aa, >Antimicrobial... at 44.58%
22     84aa, >Antimicrobial... at 41.67%
23     85aa, >Antimicrobial... at 48.24%
24     92aa, >Antimicrobial... at 46.74%
25     88aa, >Antimicrobial... at 40.91%
26     87aa, >Antimicrobial... at 42.53%
27     86aa, >Antimicrobial... at 43.02%
28     86aa, >Antimicrobial... at 41.86%
29     93aa, >Antimicrobial... at 40.86%
30     88aa, >Antimicrobial... at 45.45%
31     86aa, >Antimicrobial... at 44.19%
32     95aa, >Antimicrobial... at 35.00%
33     88aa, >Antimicrobial... at 43.18%
34     32aa, >Antimicrobial... at 50.00%
35     86aa, >Antimicrobial... at 45.35%
36     90aa, >Antimicrobial... at 51.11%
37     96aa, >Antimicrobial... at 55.21%
38     88aa, >Antimicrobial... *
39     93aa, >Antimicrobial... at 46.24%
40     52aa, >Antimicrobial... at 59.62%
41     61aa, >antibacterial06692... at 49.18%
42     85aa, >antibacterial06879... at 41.18%
43     96aa, >antibacterial07190... at 45.83%
44     87aa, >antibacterial09845... at 41.38%
45     81aa, >antibacterial11021... at 43.21%

```

```

46      85aa, >antibacterial11022... at 44.71%
47      88aa, >antibacterial11024... at 43.18%
48      95aa, >antibacterial11025... at 41.05%
49      88aa, >antibacterial11027... at 44.32%
50      88aa, >antibacterial11028... at 42.05%
51      84aa, >antibacterial11029... at 40.48%
52      84aa, >antibacterial11030... at 42.86%
53      84aa, >antibacterial11031... at 46.43%
>Cluster 314
0       98aa, >Antibacterial... *
1       13aa, >antibacterial06596... at 46.15%
2       24aa, >antibacterial06977... at 45.83%
>Cluster 315
0       24aa, >antimicrobial... at 41.67%
1       98aa, >anti-Gram+;Antibact... *
2       11aa, >antibacterial09818... at 45.45%
>Cluster 316
0       33aa, >antimicrobial... at 42.42%
1       34aa, >antibacterial... at 41.18%
2       77aa, >anti-Gram+;Antibact... at 46.75%
3       98aa, >antibacterial06805... *
4       96aa, >antibacterial07155... at 60.42%
5       96aa, >antibacterial07156... at 62.50%
>Cluster 317
0       35aa, >antimicrobial... at 35.00%
1       38aa, >anti-Gram+;antibact... at 42.11%
2       38aa, >antimicrobial... at 42.11%
3       38aa, >antimicrobial... at 42.11%
4       38aa, >antibacterial;antim... at 44.74%
5       36aa, >antimicrobial... at 41.67%
6       37aa, >antimicrobial... at 40.54%
7       38aa, >antimicrobial... at 42.11%
8       38aa, >antibacterial;antim... at 44.74%
9       34aa, >anti-Gram+;antimicr... at 44.12%
10      42aa, >antimicrobial... at 47.62%
11      34aa, >anti-Gram+;antimicr... at 50.00%
12      44aa, >Antibacterial;antim... at 40.91%
13      42aa, >antimicrobial... at 42.86%
14      41aa, >antifungal;antimicr... at 51.22%
15      94aa, >antibacterial06808... at 42.55%
16      94aa, >antibacterial06809... at 40.43%
17      83aa, >antibacterial06810... at 48.19%
18      98aa, >antibacterial06867... *
19      98aa, >antibacterial06903... at 50.00%
20      46aa, >antibacterial07541... *
21      18aa, >antibacterial07948... at 44.44%
>Cluster 318
0       24aa, >antimicrobial... at 41.67%
1       24aa, >antibacterial;antif... at 41.67%
2       23aa, >antimicrobial... at 52.17%
3       20aa, >antimicrobial... at 35.00%
4       66aa, >Antimicrobial... at 40.91%
5       96aa, >antibacterial06804... at 45.83%
6       88aa, >antibacterial06845... at 43.18%

```



```

7      88aa, >antibacterial06890... at 45.45%
8      90aa, >antibacterial07109... at 45.56%
9      88aa, >antibacterial07114... at 45.45%
10     98aa, >antibacterial07222... *
11     50aa, >antibacterial07266... at 35.00%
12     63aa, >antibacterial10943... at 44.44%
13     26aa, >antibacterial11396... at 42.31%
14     25aa, >antibacterial11415... at 44.00%
>Cluster 319
0      97aa, >Antiviral... *
1      20aa, >antibacterial11322... at 35.00%
2      13aa, >antibacterial12246... at 46.15%
>Cluster 320
0      59aa, >anti-Gram+;Antibact... at 44.07%
1      41aa, >antimicrobial... at 41.46%
2      97aa, >Antibacterial... *
3      76aa, >Antimicrobial... at 42.11%
>Cluster 321
0      33aa, >anti-Gram+;antibact... at 42.42%
1      97aa, >Antimicrobial... *
2      33aa, >antimicrobial... at 42.42%
>Cluster 322
0      61aa, >Antimicrobial... at 85.25%
1      97aa, >Antimicrobial... *
2      58aa, >Antimicrobial... at 50.00%
3      52aa, >Antimicrobial... at 51.92%
4      13aa, >antibacterial11654... at 46.15%
>Cluster 323
0      97aa, >Antimicrobial... *
1      20aa, >antibacterial08062... at 45.00%
>Cluster 324
0      97aa, >anti-Gram+;Antibact... *
1      97aa, >anti-Gram+;Gram-... at 64.95%
2      97aa, >Antibacterial... at 63.92%
3      26aa, >antibacterial09201... at 42.31%
4      66aa, >antibacterial09738... at 53.03%
5      24aa, >antibacterial10044... at 41.67%
6      14aa, >antibacterial10642... at 42.86%
7      11aa, >antibacterial10662... at 54.55%
8      80aa, >antibacterial11073... at 67.50%
9      13aa, >antibacterial12050... at 46.15%
10     13aa, >antibacterial12057... *
>Cluster 325
0      18aa, >Antimicrobial... at 44.44%
1      94aa, >antibacterial06733... at 43.62%
2      97aa, >antibacterial06748... *
3      93aa, >antibacterial06751... at 47.31%
4      95aa, >antibacterial06752... at 44.21%
5      86aa, >antibacterial07234... at 43.02%
6      87aa, >antibacterial07298... at 41.38%
7      20aa, >antibacterial07634... at 35.00%
>Cluster 326
0      29aa, >anti-Gram+;antifung... at 44.83%
1      50aa, >antibacterial06470... at 50.00%

```

```

2    13aa, >antibacterial06605... at 46.15%
3    46aa, >antibacterial07051... at 52.17%
4    46aa, >antibacterial07052... at 50.00%
5    46aa, >antibacterial07075... at 43.48%
6    46aa, >antibacterial07079... at 45.65%
7    46aa, >antibacterial07282... at 43.48%
8    97aa, >antibacterial07542... *
9    71aa, >antibacterial07618... at 42.25%
10   24aa, >antibacterial08131... at 41.67%
11   29aa, >antibacterial09884... at 41.38%
12   18aa, >antibacterial10339... at 44.44%
13   13aa, >antibacterial10428... at 53.85%
14   18aa, >antibacterial10543... *
15   27aa, >antibacterial113147... at 44.44%
>Cluster 327
0    75aa, >Antibacterial... at 79.00%
1    97aa, >antibacterial110809... *
2    28aa, >antibacterial113003... at 42.86%
>Cluster 328
0    30aa, >antibacterial108495... at 35.00%
1    30aa, >antibacterial108496... at 35.00%
2    97aa, >antibacterial110899... *
3    21aa, >antibacterial112834... at 42.86%
>Cluster 329
0    78aa, >Antimicrobial... at 55.13%
1    52aa, >Antimicrobial... at 50.00%
2    36aa, >antimicrobial... at 41.67%
3    55aa, >Antibacterial;Antim... at 54.55%
4    80aa, >Antimicrobial... at 46.25%
5    73aa, >Antimicrobial... at 53.42%
6    79aa, >Antimicrobial... at 50.63%
7    67aa, >Antimicrobial... at 58.21%
8    80aa, >Antimicrobial... at 50.00%
9    94aa, >Antimicrobial... at 50.00%
10   96aa, >Antimicrobial... *
11   78aa, >Antimicrobial... at 55.13%
12   36aa, >antibacterial109012... at 41.67%
>Cluster 330
0    96aa, >Anti-Gram-... *
>Cluster 331
0    31aa, >antimicrobial... at 41.94%
1    96aa, >Antimicrobial... *
>Cluster 332
0    96aa, >anti-Gram+;Antibact... *
1    15aa, >antibacterial110441... at 35.00%
>Cluster 333
0    73aa, >Antimicrobial... at 42.47%
1    96aa, >antibacterial106880... *
2    84aa, >antibacterial107593... at 51.19%
>Cluster 334
0    96aa, >antibacterial107220... *
1    23aa, >antibacterial107655... at 43.48%
>Cluster 335
0    26aa, >Antibacterial;Antif... at 42.31%

```

```

1      93aa, >antibacterial06725... at 40.86%
2      96aa, >antibacterial07241... *
3      95aa, >antibacterial07248... at 80.00%
4      73aa, >antibacterial07250... at 45.21%
>Cluster 336
0      95aa, >anti-HIV;antiviral... *
>Cluster 337
0      95aa, >Antimicrobial... *
1      74aa, >Antimicrobial... at 47.30%
>Cluster 338
0      95aa, >Antimicrobial... *
1      12aa, >antibacterial08969... at 41.67%
2      12aa, >antibacterial08971... at 41.67%
>Cluster 339
0      95aa, >Antimicrobial... *
>Cluster 340
0      13aa, >antimicrobial... at 53.85%
1      32aa, >antimicrobial... at 43.75%
2      91aa, >antibacterial06476... at 61.54%
3      91aa, >antibacterial06564... *
4      92aa, >antibacterial06757... at 51.09%
5      92aa, >antibacterial06759... at 61.96%
6      92aa, >antibacterial06760... at 59.78%
7      91aa, >antibacterial06761... at 63.74%
8      88aa, >antibacterial06762... at 60.23%
9      92aa, >antibacterial06763... at 55.43%
10     78aa, >antibacterial06764... at 44.87%
11     92aa, >antibacterial06796... at 63.04%
12     95aa, >antibacterial06797... *
13     94aa, >antibacterial06799... at 46.81%
14     92aa, >antibacterial07144... at 55.43%
15     93aa, >antibacterial07145... at 59.14%
16     83aa, >antibacterial07225... at 43.37%
17     87aa, >antibacterial07227... at 50.57%
18     92aa, >antibacterial07228... at 56.52%
19     93aa, >antibacterial07229... at 51.61%
20     94aa, >antibacterial07230... at 50.00%
21     91aa, >antibacterial07301... at 57.14%
22     90aa, >antibacterial07302... at 63.33%
23     92aa, >antibacterial07508... at 51.09%
24     91aa, >antibacterial07509... at 60.44%
25     91aa, >antibacterial07510... at 56.04%
26     91aa, >antibacterial07511... at 57.14%
27     91aa, >antibacterial07512... at 54.95%
28     91aa, >antibacterial07513... at 59.34%
29     14aa, >antibacterial09919... at 42.86%
30     23aa, >antibacterial11646... at 43.48%
>Cluster 341
0      76aa, >Antimicrobial... at 84.21%
1      76aa, >Antimicrobial... at 89.47%
2      51aa, >Antimicrobial... at 41.18%
3      19aa, >anti-Gram+;antibact... at 52.63%
4      67aa, >Antimicrobial... at 43.28%
5      67aa, >Antimicrobial... at 40.30%

```

```

6      95aa, >antibacterial06816... *
7      33aa, >antibacterial07543... at 42.42%
8      29aa, >antibacterial10263... at 41.38%
>Cluster 342
0      38aa, >antifungal;antimicr... at 42.11%
1      38aa, >antifungal... at 44.74%
2      49aa, >anti-Gram+;antibact... at 42.86%
3      42aa, >anti-Gram+;antibact... at 40.48%
4      37aa, >anti-Gram+;Antibact... *
5      38aa, >anti-Gram+;antibact... at 37.89%
6      39aa, >antimicrobial... at 46.15%
7      39aa, >antibacterial;antim... at 48.72%
8      38aa, >antimicrobial... at 33.16%
9      39aa, >antimicrobial... at 41.03%
10     39aa, >antimicrobial... at 36.15%
11     37aa, >antimicrobial... at 40.54%
12     73aa, >antibacterial07125... at 42.47%
13     73aa, >antibacterial07126... at 42.47%
14     40aa, >antibacterial08370... at 82.50%
15     40aa, >antibacterial08792... *
16     40aa, >antibacterial08794... at 80.00%
17     11aa, >antibacterial09466... at 45.45%
18     17aa, >antibacterial10179... at 41.18%
19     40aa, >antibacterial10274... at 72.50%
20     37aa, >antibacterial10378... at 67.57%
21     40aa, >antibacterial10480... at 35.00%
22     55aa, >antibacterial10681... at 35.00%
23     36aa, >antibacterial10772... at 55.56%
24     95aa, >antibacterial10821... *
25     42aa, >antibacterial112388... at 72.86%
>Cluster 343
0      37aa, >anti-Gram+;Antibact... at 40.54%
1      32aa, >antimicrobial... at 40.62%
2      68aa, >Antibacterial... at 42.65%
3      76aa, >Antiviral... at 72.37%
4      76aa, >Antibacterial;Antif... *
5      94aa, >antibacterial07133... at 73.40%
6      21aa, >antibacterial09715... at 47.62%
7      25aa, >antibacterial10306... at 35.00%
8      95aa, >antibacterial11058... *
9      95aa, >antibacterial11063... at 78.95%
10     91aa, >antibacterial11069... at 40.66%
>Cluster 344
0      91aa, >Antibacterial;Antif... at 49.45%
1      90aa, >Antimicrobial... at 48.89%
2      93aa, >Antibacterial... at 49.46%
3      93aa, >Antimicrobial... at 50.54%
4      90aa, >Antimicrobial... at 43.33%
5      93aa, >Antimicrobial... at 49.46%
6      90aa, >Antibacterial;Antif... at 52.22%
7      90aa, >Antimicrobial... at 54.44%
8      90aa, >Antimicrobial... at 45.56%
9      93aa, >Antibacterial... at 45.16%
10     94aa, >Antimicrobial... *

```

11 92aa, >Antimicrobial... at 48.91%  
12 93aa, >Antimicrobial... at 48.39%  
13 90aa, >Antibacterial;Antif... at 43.33%  
14 90aa, >Antimicrobial... at 44.44%  
15 92aa, >Antimicrobial... at 47.83%  
16 91aa, >Antimicrobial... at 53.85%  
17 93aa, >Antibacterial... at 40.86%  
18 94aa, >Antimicrobial... at 40.43%  
19 93aa, >Antimicrobial... at 48.39%  
20 90aa, >Antifungal;Antimicr... at 47.78%  
21 91aa, >Antimicrobial... at 51.65%  
22 91aa, >Antifungal... at 48.35%  
23 92aa, >Antimicrobial... at 50.00%  
24 32aa, >Antifungal... at 43.75%  
25 23aa, >Antifungal... \*  
26 91aa, >Antimicrobial... at 42.86%  
27 13aa, >antimicrobial... \*  
28 93aa, >Antimicrobial... at 43.01%  
29 17aa, >antibacterial07398... at 41.18%  
30 25aa, >antibacterial07623... at 35.00%

>Cluster 345

0 25aa, >anti-Gram+;Gram-... at 35.00%  
1 34aa, >anti-Gram+;antibact... at 41.18%  
2 94aa, >Antibacterial... \*  
3 27aa, >antibacterial;antif... at 40.74%  
4 14aa, >antibacterial08916... at 42.86%  
5 18aa, >antibacterial09326... at 44.44%  
6 18aa, >antibacterial09709... at 44.44%  
7 13aa, >antibacterial12060... at 46.15%

>Cluster 346

0 36aa, >Antibacterial;Antim... at 44.44%  
1 79aa, >Antimicrobial... at 56.96%  
2 82aa, >Antimicrobial... at 56.10%  
3 80aa, >Antimicrobial... at 61.25%  
4 63aa, >Antimicrobial... at 61.90%  
5 82aa, >Antimicrobial... at 54.88%  
6 81aa, >Antimicrobial... at 53.09%  
7 81aa, >Antimicrobial... at 55.56%  
8 68aa, >Antimicrobial... at 61.76%  
9 38aa, >Antimicrobial... at 44.74%  
10 58aa, >Antimicrobial... at 62.07%  
11 91aa, >Antimicrobial... at 52.75%  
12 94aa, >Antimicrobial... \*  
13 81aa, >Antimicrobial... at 56.79%  
14 23aa, >antibacterial08097... at 43.48%  
15 20aa, >antibacterial11596... at 35.00%

>Cluster 347

0 47aa, >anti-Gram+;antibact... \*  
1 33aa, >Antimicrobial... at 42.42%  
2 94aa, >Antimicrobial... \*  
3 94aa, >Antimicrobial... at 85.11%  
4 91aa, >Antimicrobial... at 43.96%  
5 33aa, >anti-Gram+;antibact... at 42.42%

>Cluster 348

```

0      27aa, >antibacterial;antim... at 44.44%
1      36aa, >antimicrobial... at 44.44%
2      94aa, >Antimicrobial... *
3      94aa, >Antimicrobial... at 63.83%
4      94aa, >Antimicrobial... at 61.70%
5      94aa, >Antimicrobial... at 53.19%
6      39aa, >antimicrobial... at 51.28%
7      24aa, >antibacterial10365... at 41.67%
>Cluster 349
0      94aa, >Antibacterial... *
>Cluster 350
0      55aa, >Antifungal... at 43.64%
1      33aa, >Antimicrobial... at 42.42%
2      21aa, >Antibacterial... at 42.86%
3      57aa, >antifungal... at 45.61%
4      55aa, >Antifungal... at 35.00%
5      50aa, >antimicrobial... at 35.00%
6      94aa, >antibacterial06826... *
7      55aa, >antibacterial08467... at 43.64%
8      42aa, >antibacterial10848... at 40.48%
>Cluster 351
0      18aa, >antibacterial;antim... at 44.44%
1      94aa, >antibacterial07191... *
2      23aa, >antibacterial07960... at 47.83%
3      35aa, >antibacterial08400... at 35.00%
4      46aa, >antibacterial10833... at 83.48%
>Cluster 352
0      94aa, >antibacterial07294... *
1      18aa, >antibacterial10129... at 50.00%
2      29aa, >antibacterial11636... at 41.38%
>Cluster 353
0      24aa, >antimicrobial... at 41.67%
1      94aa, >antibacterial10807... *
2      86aa, >antibacterial10808... at 67.44%
3      87aa, >antibacterial10902... at 66.67%
>Cluster 354
0      48aa, >Antimicrobial... at 45.83%
1      53aa, >Antimicrobial... at 43.40%
2      66aa, >Antimicrobial... at 54.55%
3      75aa, >Antimicrobial... *
4      78aa, >Antimicrobial... at 52.56%
5      66aa, >Antimicrobial... at 57.58%
6      71aa, >Antimicrobial... at 57.75%
7      81aa, >Antimicrobial... at 50.62%
8      81aa, >Antimicrobial... at 50.62%
9      76aa, >Antimicrobial... at 55.26%
10     79aa, >Antimicrobial... at 45.57%
11     73aa, >antibacterial06710... at 52.05%
12     77aa, >antibacterial06711... at 51.95%
13     77aa, >antibacterial06712... at 51.95%
14     72aa, >antibacterial06713... at 56.94%
15     72aa, >antibacterial06715... at 58.33%
16     75aa, >antibacterial06745... at 52.00%
17     71aa, >antibacterial07087... at 54.93%

```

```

18 66aa, >antibacterial07221... at 51.52%
19 64aa, >antibacterial07240... at 57.81%
20 66aa, >antibacterial10804... at 59.09%
21 57aa, >antibacterial10966... at 59.65%
22 66aa, >antibacterial10970... at 56.06%
23 81aa, >antibacterial10971... at 54.32%
24 77aa, >antibacterial10973... at 55.84%
25 73aa, >antibacterial10975... at 57.53%
26 94aa, >antibacterial10980... *
27 91aa, >antibacterial10981... at 72.53%
28 67aa, >antibacterial10982... at 67.16%
>Cluster 355
0 93aa, >Antifungal;Antimicro... *
1 33aa, >antimicrobial... at 45.45%
2 33aa, >antimicrobial... at 45.45%
3 33aa, >antimicrobial... at 42.42%
4 90aa, >Antifungal... at 35.00%
5 91aa, >Antibacterial;Antif... at 40.66%
6 92aa, >Antimicrobial... at 46.74%
7 13aa, >antibacterial08030... at 46.15%
>Cluster 356
0 93aa, >Antibacterial... *
1 87aa, >Antibacterial... at 41.38%
>Cluster 357
0 28aa, >Antibacterial... at 57.14%
1 30aa, >antimicrobial... at 43.33%
2 32aa, >antimicrobial... at 56.25%
3 31aa, >antimicrobial... *
4 33aa, >antimicrobial... at 45.45%
5 31aa, >anti-HIV;Antimicrob... at 41.94%
6 31aa, >Antibacterial;Antim... at 61.29%
7 28aa, >anti-HIV;antimicrob... at 42.86%
8 31aa, >Antimicrobial... at 58.06%
9 31aa, >antimicrobial... at 61.29%
10 93aa, >Antimicrobial... *
11 31aa, >antibacterial06485... at 58.06%
>Cluster 358
0 93aa, >antifungal... *
>Cluster 359
0 38aa, >antimicrobial... at 42.11%
1 38aa, >antimicrobial... at 42.11%
2 93aa, >Antimicrobial... *
3 32aa, >antibacterial07420... at 40.62%
>Cluster 360
0 93aa, >Antimicrobial... *
1 90aa, >Antimicrobial... at 54.44%
>Cluster 361
0 13aa, >antimicrobial... at 46.15%
1 36aa, >antibacterial;antim... at 44.44%
2 93aa, >Antibacterial;Antif... *
3 46aa, >antimicrobial... at 41.30%
4 13aa, >antibacterial06598... at 46.15%
5 29aa, >antibacterial07359... at 44.83%
6 29aa, >antibacterial07360... at 44.83%

```

>Cluster 362

```
0    28aa, >antimicrobial... at 42.86%
1    21aa, >Antifungal... at 42.86%
2    77aa, >Antibacterial... at 49.35%
3    76aa, >Antibacterial... at 55.26%
4    77aa, >anti-Gram+;Antibact... at 42.86%
5    29aa, >antibacterial;Antif... at 44.83%
6    33aa, >antibacterial... at 45.45%
7    34aa, >antibacterial... at 55.88%
8    23aa, >antibacterial06452... at 43.48%
9    93aa, >antibacterial06793... *
10   86aa, >antibacterial07129... at 83.72%
11   74aa, >antibacterial07449... at 44.59%
12   77aa, >antibacterial10399... at 44.16%
13   70aa, >antibacterial10761... at 52.86%
```

>Cluster 363

```
0    75aa, >Antibacterial... at 83.33%
1    75aa, >Antibacterial;Antim... *
2    75aa, >Antimicrobial... at 82.67%
3    46aa, >Antimicrobial... at 81.30%
4    76aa, >Antimicrobial... at 44.74%
5    76aa, >Antimicrobial... at 50.00%
6    77aa, >Antimicrobial... at 51.95%
7    76aa, >Antimicrobial... at 52.63%
8    28aa, >antibacterial;Antif... at 42.86%
9    75aa, >Antimicrobial... at 54.67%
10   75aa, >Antimicrobial... at 46.67%
11   75aa, >Antibacterial;Antim... at 45.33%
12   75aa, >Antibacterial... at 49.33%
13   88aa, >Antimicrobial... at 85.23%
14   79aa, >Antimicrobial... at 48.10%
15   75aa, >Antimicrobial... at 52.00%
16   73aa, >Antimicrobial... at 57.53%
17   75aa, >Antimicrobial... at 44.00%
18   77aa, >Antimicrobial... at 54.55%
19   76aa, >Antimicrobial... at 52.63%
20   93aa, >antibacterial06846... *
```

>Cluster 364

```
0    37aa, >Antimicrobial... at 40.54%
1    34aa, >anti-Gram+;Antibact... at 41.18%
2    60aa, >Antibacterial... *
3    60aa, >Antibacterial... at 56.67%
4    67aa, >Antibacterial... at 41.79%
5    89aa, >Antibacterial... at 40.45%
6    71aa, >Antibacterial... at 42.25%
7    76aa, >Antibacterial... at 53.95%
8    38aa, >anti-Gram+;antifung... at 42.11%
9    43aa, >antifungal;antimicr... at 41.86%
10   85aa, >antibacterial06791... at 56.47%
11   93aa, >antibacterial06873... *
12   39aa, >antibacterial08785... at 46.15%
13   26aa, >antibacterial11425... at 42.31%
14   38aa, >antibacterial11792... at 42.11%
```

>Cluster 365



```

0      20aa, >antibacterial08544... at 35.00%
1      93aa, >antibacterial10859... *
2      25aa, >antibacterial11451... at 35.00%
>Cluster 366
0      20aa, >antibacterial06684... at 35.00%
1      20aa, >antibacterial07485... at 35.00%
2      21aa, >antibacterial09523... at 42.86%
3      84aa, >antibacterial10819... at 54.76%
4      88aa, >antibacterial10820... at 45.45%
5      82aa, >antibacterial11036... at 53.66%
6      93aa, >antibacterial11039... *
7      36aa, >antibacterial11544... at 41.67%
8      37aa, >antibacterial13231... at 43.24%
>Cluster 367
0      11aa, >antibacterial08025... at 45.45%
1      19aa, >antibacterial09622... at 47.37%
2      93aa, >antibacterial11041... *
>Cluster 368
0      35aa, >Antimicrobial... at 35.00%
1      27aa, >antibacterial;antif... at 40.74%
2      87aa, >antibacterial07214... at 41.38%
3      93aa, >antibacterial11088... *
>Cluster 369
0      92aa, >Antimicrobial... *
>Cluster 370
0      45aa, >Antifungal... at 42.22%
1      42aa, >antimicrobial... at 40.48%
2      52aa, >anti-Gram+;antibact... at 46.15%
3      48aa, >antifungal;antimicr... *
4      29aa, >Antimicrobial... at 41.38%
5      47aa, >Antimicrobial... at 42.55%
6      48aa, >antibacterial... at 47.92%
7      47aa, >antifungal;antimicr... at 44.68%
8      47aa, >Antimicrobial... at 46.81%
9      47aa, >Antimicrobial... at 40.43%
10     47aa, >anti-Gram+;antibact... at 42.55%
11     50aa, >Antimicrobial... at 35.00%
12     77aa, >Antimicrobial... at 63.64%
13     78aa, >Antimicrobial... *
14     92aa, >Antimicrobial... *
15     76aa, >Antimicrobial... at 46.05%
16     51aa, >Antifungal;antimicr... at 45.10%
17     48aa, >anti-Gram+;antibact... at 64.58%
18     49aa, >antimicrobial... at 51.02%
19     47aa, >antimicrobial... at 44.68%
20     46aa, >Antimicrobial... at 54.35%
21     12aa, >anti-Gram+;antibact... at 41.67%
22     74aa, >antibacterial06717... at 52.16%
23     75aa, >antibacterial06718... at 44.00%
24     80aa, >antibacterial06754... at 51.25%
25     77aa, >antibacterial06776... *
26     74aa, >antibacterial06779... at 47.30%
27     73aa, >antibacterial06780... at 46.58%
28     77aa, >antibacterial06820... at 57.14%

```

```

29    80aa, >antibacterial06852... at 43.75%
30    73aa, >antibacterial06853... at 52.05%
31    77aa, >antibacterial06854... at 61.04%
32    77aa, >antibacterial06856... at 58.44%
33    78aa, >antibacterial06869... at 58.97%
34    76aa, >antibacterial06895... at 53.95%
35    47aa, >antibacterial07364... at 51.06%
36    49aa, >antibacterial07418... at 48.98%
37    22aa, >antibacterial07577... at 59.09%
38    24aa, >antibacterial08333... at 41.67%
39    46aa, >antibacterial10574... at 50.00%
40    24aa, >antibacterial11881... at 41.67%
>Cluster 371
0     92aa, >Antimicrobial... *
>Cluster 372
0     30aa, >anti-Gram-;antibact... at 43.33%
1     16aa, >antibacterial... at 50.00%
2     92aa, >Gram-... *
3     36aa, >antibacterial10760... at 41.67%
4     19aa, >antibacterial113078... at 42.11%
>Cluster 373
0     24aa, >anti-Gram+;Antibact... at 41.67%
1     29aa, >antibacterial;antif... at 41.38%
2     30aa, >antimicrobial;antiv... at 35.00%
3     24aa, >Antibacterial;Antif... at 45.83%
4     92aa, >Antimicrobial... *
>Cluster 374
0     37aa, >anti-Gram+;antibact... at 40.54%
1     70aa, >antibacterial06770... at 50.00%
2     64aa, >antibacterial06901... at 46.88%
3     72aa, >antibacterial06902... at 48.61%
4     77aa, >antibacterial06931... at 41.56%
5     75aa, >antibacterial07128... at 70.67%
6     71aa, >antibacterial07231... at 54.93%
7     92aa, >antibacterial07257... *
8     13aa, >antibacterial11745... at 46.15%
9     18aa, >antibacterial113095... at 44.44%
>Cluster 375
0     26aa, >antimicrobial... at 46.15%
1     58aa, >antibacterial08293... at 68.93%
2     59aa, >antibacterial08294... at 81.36%
3     58aa, >antibacterial09909... at 79.31%
4     92aa, >antibacterial111066... *
>Cluster 376
0     91aa, >Antifungal... *
1     24aa, >antibacterial;Antif... at 41.67%
2     47aa, >antibacterial07324... at 46.81%
>Cluster 377
0     24aa, >anti-Gram+;antibact... at 45.83%
1     24aa, >antibacterial;antif... at 41.67%
2     42aa, >Antibacterial... at 40.48%
3     65aa, >Antibacterial... *
4     65aa, >Antibacterial... at 82.31%
5     91aa, >Antimicrobial... *

```

```

6      87aa, >antibacterial07184... at 59.77%
7      38aa, >antibacterial07938... at 42.11%
8      39aa, >antibacterial08309... at 41.03%
>Cluster 378
0      26aa, >antibacterial;Antif... at 53.85%
1      63aa, >Antimicrobial... at 55.56%
2      21aa, >Antimicrobial... *
3      44aa, >antimicrobial... at 50.00%
4      46aa, >antimicrobial... at 47.83%
5      46aa, >antimicrobial... at 47.83%
6      46aa, >antimicrobial... at 45.65%
7      46aa, >anti-Gram+;antibact... at 43.48%
8      46aa, >anti-Gram+;antibact... at 52.17%
9      46aa, >Antimicrobial... at 52.17%
10     46aa, >antimicrobial... at 54.35%
11     46aa, >anti-Gram+;antibact... at 50.00%
12     46aa, >anti-Gram+;antibact... at 50.00%
13     44aa, >antimicrobial... at 45.45%
14     46aa, >anti-Gram+;Antibact... at 45.65%
15     44aa, >antimicrobial... at 50.00%
16     44aa, >antimicrobial... at 50.00%
17     46aa, >anti-Gram+;Antibact... at 47.83%
18     56aa, >Antimicrobial... at 46.43%
19     32aa, >anti-Gram+;Antibact... at 40.62%
20     33aa, >antibacterial;antim... at 45.45%
21     35aa, >antibacterial;antim... at 35.00%
22     46aa, >anti-Gram+;anti-HIV... at 47.83%
23     46aa, >anti-Gram+;Antibact... at 45.65%
24     46aa, >antimicrobial... at 56.52%
25     46aa, >Antimicrobial... *
26     46aa, >antimicrobial... at 60.87%
27     46aa, >antimicrobial... at 54.35%
28     46aa, >anti-Gram+;antibact... at 45.65%
29     46aa, >anti-Gram+;Antibact... at 58.70%
30     28aa, >antimicrobial... at 46.43%
31     70aa, >Antimicrobial... at 52.86%
32     70aa, >Antimicrobial... at 54.29%
33     84aa, >Antimicrobial... at 66.67%
34     75aa, >Antimicrobial... at 41.33%
35     84aa, >Antimicrobial... at 71.43%
36     84aa, >Antimicrobial... at 66.67%
37     84aa, >Antimicrobial... at 67.86%
38     84aa, >Antimicrobial... *
39     91aa, >Antimicrobial... *
40     86aa, >Antimicrobial... at 61.63%
41     85aa, >Antimicrobial... at 64.71%
42     84aa, >antibacterial06785... at 61.90%
43     20aa, >antibacterial10625... at 45.00%
44     23aa, >antibacterial11574... at 43.48%
>Cluster 379
0      76aa, >anti-Gram+... at 43.42%
1      91aa, >Antimicrobial... *
>Cluster 380
0      58aa, >anti-Gram+... at 63.79%

```

```

1      19aa, >anti-Gram+;antifung... at 42.11%
2      91aa, >Antimicrobial... *
3      91aa, >Antimicrobial... at 49.45%
4      21aa, >antibacterial;antim... at 47.62%
5      13aa, >antibacterial10431... at 46.15%
6      13aa, >antibacterial10433... at 46.15%
7      13aa, >antibacterial12331... at 46.15%
>Cluster 381
0      39aa, >Antimicrobial... at 41.03%
1      86aa, >Antimicrobial... at 40.70%
2      87aa, >Antimicrobial... at 40.23%
3      91aa, >Antimicrobial... *
>Cluster 382
0      16aa, >antibacterial06585... at 43.75%
1      13aa, >antibacterial06615... at 46.15%
2      91aa, >antibacterial06842... *
3      91aa, >antibacterial07107... at 80.22%
4      91aa, >antibacterial07108... at 86.81%
>Cluster 383
0      23aa, >antimicrobial... at 43.48%
1      91aa, >antibacterial07148... *
>Cluster 384
0      90aa, >Antimicrobial... *
1      24aa, >antibacterial12677... at 41.67%
>Cluster 385
0      90aa, >anti-Gram+;Antibact... *
1      18aa, >antibacterial;Antif... at 44.44%
>Cluster 386
0      56aa, >Antimicrobial... *
1      88aa, >Antimicrobial... at 40.91%
2      88aa, >Antimicrobial... at 51.14%
3      89aa, >Antimicrobial... at 49.44%
4      89aa, >Antimicrobial... at 50.56%
5      88aa, >Antimicrobial... at 45.45%
6      86aa, >Antimicrobial... at 55.81%
7      88aa, >Antimicrobial... at 59.09%
8      88aa, >Antimicrobial... at 67.05%
9      66aa, >Antimicrobial... at 40.91%
10     55aa, >Antimicrobial... at 80.91%
11     88aa, >Antimicrobial... at 83.18%
12     90aa, >Antimicrobial... *
13     88aa, >Antimicrobial... at 83.18%
14     87aa, >Antimicrobial... at 43.68%
15     89aa, >Antimicrobial... at 43.82%
16     86aa, >Antimicrobial... at 48.84%
17     89aa, >Antimicrobial... at 41.57%
18     88aa, >Antimicrobial... at 50.00%
19     88aa, >Antimicrobial... at 50.00%
20     20aa, >antibacterial;antim... at 50.00%
21     43aa, >Antimicrobial... *
22     88aa, >antibacterial06877... at 44.32%
23     87aa, >antibacterial06878... at 45.98%
24     88aa, >antibacterial11023... at 59.09%
25     88aa, >antibacterial11026... at 56.82%

```

```

>Cluster 387
0      84aa, >Antimicrobial... at 67.86%
1      81aa, >Antimicrobial... at 70.37%
2      77aa, >Antimicrobial... at 77.92%
3      90aa, >Antimicrobial... *
4      87aa, >Antimicrobial... at 62.07%
5      83aa, >Antimicrobial... at 67.47%
>Cluster 388
0      33aa, >antibacterial;antim... at 42.42%
1      88aa, >antibacterial06456... at 46.59%
2      88aa, >antibacterial06460... at 48.86%
3      90aa, >antibacterial06738... *
4      90aa, >antibacterial06739... at 57.78%
5      89aa, >antibacterial06744... at 51.69%
6      88aa, >antibacterial06801... at 40.91%
7      88aa, >antibacterial06802... at 42.05%
8      86aa, >antibacterial06827... at 44.19%
9      89aa, >antibacterial07098... at 53.93%
10     86aa, >antibacterial07147... at 46.51%
11     89aa, >antibacterial07224... at 43.82%
12     88aa, >antibacterial07297... at 53.41%
13     88aa, >antibacterial07479... at 51.14%
14     88aa, >antibacterial07480... at 52.27%
15     88aa, >antibacterial07481... at 48.86%
16     88aa, >antibacterial07482... at 53.41%
17     24aa, >antibacterial08130... at 50.00%
18     24aa, >antibacterial08138... *
19     24aa, >antibacterial08140... at 45.83%
20     22aa, >antibacterial08729... at 40.91%
21     24aa, >antibacterial10317... at 41.67%
22     21aa, >antibacterial10599... at 47.62%
>Cluster 389
0      47aa, >antimicrobial... at 40.43%
1      90aa, >antibacterial10983... *
>Cluster 390
0      31aa, >Antimicrobial... at 45.16%
1      32aa, >antimicrobial... at 53.12%
2      30aa, >antimicrobial... at 46.67%
3      31aa, >Antimicrobial;Antim... at 58.06%
4      31aa, >antibacterial;antim... at 54.84%
5      30aa, >antimicrobial... at 35.00%
6      30aa, >antimicrobial... at 35.00%
7      78aa, >Antimicrobial... at 69.23%
8      89aa, >Antimicrobial... *
9      79aa, >Antimicrobial... *
10     31aa, >antibacterial10753... at 54.84%
11     20aa, >antibacterial10918... at 50.00%
12     59aa, >antibacterial11044... at 40.68%
13     23aa, >antibacterial11849... at 43.48%
>Cluster 391
0      89aa, >Antimicrobial... *
>Cluster 392
0      71aa, >anti-Gram+;Antimicr... at 46.48%
1      23aa, >anti-Gram+;antibact... at 43.48%

```

```

2      76aa, >Antimicrobial... at 46.05%
3      77aa, >Antimicrobial... at 40.26%
4      81aa, >Antimicrobial... at 58.02%
5      85aa, >Antimicrobial... at 47.06%
6      89aa, >Antimicrobial... *
7      65aa, >Antimicrobial... at 35.00%
8      76aa, >Antimicrobial... at 48.68%
9      34aa, >antibacterial10603... at 41.18%
10     18aa, >antibacterial11262... at 50.00%
11     23aa, >antibacterial11809... at 43.48%
>Cluster 393
0      27aa, >antimicrobial... at 44.44%
1      34aa, >antimicrobial... at 41.18%
2      11aa, >antimicrobial... at 45.45%
3      89aa, >antibacterial06482... *
4      79aa, >antibacterial06906... at 46.84%
5      89aa, >antibacterial07185... at 44.94%
6      88aa, >antibacterial07186... at 47.73%
7      76aa, >antibacterial07239... at 48.68%
8      82aa, >antibacterial07254... at 46.34%
9      82aa, >antibacterial07255... at 51.22%
10     23aa, >antibacterial08681... *
>Cluster 394
0      46aa, >antibacterial;antim... at 41.30%
1      27aa, >antimicrobial... at 40.74%
2      29aa, >antimicrobial... at 41.38%
3      24aa, >Gram-... at 41.67%
4      89aa, >antibacterial06746... *
5      88aa, >antibacterial06753... at 40.91%
6      21aa, >antibacterial07391... at 42.86%
7      20aa, >antibacterial08982... at 35.00%
8      16aa, >antibacterial10494... at 43.75%
9      26aa, >antibacterial11370... at 50.00%
10     19aa, >antibacterial12016... at 42.11%
>Cluster 395
0      19aa, >antibacterial;Antif... at 42.11%
1      24aa, >anti-Gram+;antibact... at 41.67%
2      18aa, >anti-Gram+;antibact... at 44.44%
3      89aa, >antibacterial06823... *
4      72aa, >antibacterial06824... *
5      68aa, >antibacterial06825... at 45.59%
6      68aa, >antibacterial07105... at 47.06%
7      68aa, >antibacterial10816... at 41.18%
8      68aa, >antibacterial11002... at 45.59%
9      13aa, >antibacterial12145... at 36.15%
>Cluster 396
0      22aa, >antimicrobial... at 40.91%
1      35aa, >antibacterial06523... at 35.00%
2      35aa, >antibacterial07371... at 35.00%
3      89aa, >antibacterial09483... *
>Cluster 397
0      84aa, >antibacterial07252... at 83.02%
1      89aa, >antibacterial10828... *
>Cluster 398

```

```

0      55aa, >Gram-... at 41.82%
1      89aa, >antibacterial10832... *
2      70aa, >antibacterial11065... at 61.43%
>Cluster 399
0      89aa, >antibacterial10979... *
>Cluster 400
0      43aa, >Antimicrobial... at 41.86%
1      48aa, >Antimicrobial... at 41.67%
2      42aa, >Antimicrobial... at 40.48%
3      34aa, >anti-Gram+;Antibact... at 41.18%
4      45aa, >antimicrobial... at 35.00%
5      61aa, >Antimicrobial... at 81.97%
6      64aa, >antibacterial07158... at 40.62%
7      89aa, >antibacterial11072... *
8      26aa, >antibacterial13090... at 46.15%
>Cluster 401
0      88aa, >Gram-... *
1      13aa, >antibacterial12152... at 46.15%
>Cluster 402
0      33aa, >Antimicrobial... at 42.42%
1      24aa, >Antibacterial... at 50.00%
2      38aa, >Antimicrobial... at 42.11%
3      88aa, >Antimicrobial... *
4      21aa, >antibacterial08910... at 52.38%
>Cluster 403
0      81aa, >Antimicrobial... at 80.25%
1      88aa, >Antimicrobial... *
>Cluster 404
0      33aa, >antibacterial... at 45.45%
1      25aa, >Anti-Gram-;antibact... at 44.00%
2      88aa, >antibacterial06749... *
3      87aa, >antibacterial06750... at 77.01%
4      12aa, >antibacterial07581... at 41.67%
5      24aa, >antibacterial08122... at 41.67%
6      24aa, >antibacterial08135... at 41.67%
7      18aa, >antibacterial09488... at 50.00%
>Cluster 405
0      88aa, >antibacterial06766... *
>Cluster 406
0      20aa, >antiviral... at 35.00%
1      58aa, >Antimicrobial... at 44.83%
2      22aa, >antimicrobial... at 45.45%
3      83aa, >Antimicrobial... at 57.83%
4      60aa, >Antimicrobial... at 41.67%
5      86aa, >antibacterial06907... at 52.33%
6      88aa, >antibacterial06908... *
7      20aa, >antibacterial09116... at 35.00%
8      20aa, >antibacterial13175... at 35.00%
>Cluster 407
0      33aa, >Antibacterial;Antif... at 42.42%
1      88aa, >antibacterial07135... *
2      35aa, >antibacterial10571... at 48.57%
>Cluster 408
0      83aa, >antibacterial07149... at 65.06%

```

```

1      88aa, >antibacterial07150... *
2      81aa, >antibacterial07151... at 46.91%
3      82aa, >antibacterial07152... at 54.88%
>Cluster 409
0      35aa, >antibacterial;antim... at 35.00%
1      27aa, >antibacterial06705... at 40.74%
2      82aa, >antibacterial06800... at 52.44%
3      77aa, >antibacterial06904... at 41.56%
4      62aa, >antibacterial06905... at 66.13%
5      85aa, >antibacterial07243... at 81.18%
6      88aa, >antibacterial07244... *
7      88aa, >antibacterial07245... at 81.82%
8      77aa, >antibacterial07246... at 53.25%
9      82aa, >antibacterial07247... at 51.22%
>Cluster 410
0      25aa, >Antibacterial;antim... at 56.00%
1      25aa, >antimicrobial... *
2      24aa, >antifungal;antimicr... at 75.00%
3      24aa, >antimicrobial... at 79.17%
4      88aa, >antibacterial07258... *
5      81aa, >antibacterial07259... at 86.42%
6      64aa, >antibacterial07260... at 53.12%
7      15aa, >antibacterial11356... at 35.00%
>Cluster 411
0      88aa, >antibacterial07495... *
1      20aa, >antibacterial07946... at 35.00%
>Cluster 412
0      88aa, >antibacterial09677... *
>Cluster 413
0      88aa, >antibacterial11000... *
>Cluster 414
0      87aa, >Antibacterial... *
>Cluster 415
0      87aa, >Antimicrobial... *
>Cluster 416
0      87aa, >Antimicrobial... *
1      83aa, >Antimicrobial... at 51.81%
2      51aa, >Antibacterial;Gram-... at 41.18%
3      11aa, >antibacterial113245... at 45.45%
>Cluster 417
0      87aa, >Antimicrobial... *
1      50aa, >Antimicrobial... at 42.00%
>Cluster 418
0      87aa, >anti-Gram-... *
1      18aa, >antibacterial07043... at 44.44%
2      26aa, >antibacterial11460... at 42.31%
>Cluster 419
0      32aa, >anti-Gram+;antibact... at 50.00%
1      28aa, >anti-Gram+;Antibact... at 42.86%
2      17aa, >antibacterial08393... at 41.18%
3      87aa, >antibacterial110827... *
>Cluster 420
0      13aa, >antibacterial06599... at 46.15%
1      33aa, >antibacterial08219... at 42.42%

```



```

2      19aa, >antibacterial09220... at 42.11%
3      87aa, >antibacterial10861... *
>Cluster 421
0      31aa, >antimicrobial... at 45.16%
1      36aa, >antibacterial... at 41.67%
2      87aa, >antibacterial11004... *
>Cluster 422
0      67aa, >Antimicrobial... at 61.19%
1      82aa, >Antibacterial;Antif... *
2      74aa, >Antimicrobial... at 63.51%
3      72aa, >Antimicrobial... at 66.67%
4      72aa, >Antimicrobial... at 59.72%
5      75aa, >Antimicrobial... at 81.33%
6      71aa, >Antimicrobial... at 71.83%
7      67aa, >Antimicrobial... at 65.67%
8      79aa, >Antimicrobial... at 65.82%
9      71aa, >Antimicrobial... at 66.20%
10     80aa, >Antimicrobial... at 60.00%
11     72aa, >Antimicrobial... at 63.89%
12     42aa, >antibacterial08795... at 40.48%
13     22aa, >antibacterial09615... at 40.91%
14     72aa, >antibacterial11075... at 68.06%
15     73aa, >antibacterial11076... at 67.12%
16     73aa, >antibacterial11077... at 65.75%
17     71aa, >antibacterial11078... at 59.15%
18     87aa, >antibacterial11079... *
19     79aa, >antibacterial11080... *
20     71aa, >antibacterial11081... at 78.87%
21     79aa, >antibacterial11082... at 65.82%
>Cluster 423
0      86aa, >anti-Gram+;Antibact... *
1      50aa, >Antimicrobial... at 35.00%
2      30aa, >antibacterial11513... at 35.00%
>Cluster 424
0      79aa, >Antimicrobial... at 59.49%
1      86aa, >Antimicrobial... *
2      33aa, >antimicrobial... at 42.42%
>Cluster 425
0      86aa, >Antifungal... *
>Cluster 426
0      27aa, >antimicrobial... at 40.74%
1      83aa, >Antimicrobial... at 66.27%
2      81aa, >Antimicrobial... at 75.31%
3      83aa, >Antimicrobial... at 61.45%
4      86aa, >Antimicrobial... *
5      83aa, >Antimicrobial... at 79.52%
6      84aa, >Antimicrobial... at 64.29%
7      83aa, >Antimicrobial... at 79.52%
8      83aa, >Antimicrobial... at 62.65%
9      83aa, >Antimicrobial... at 69.88%
10     81aa, >Antimicrobial... at 70.37%
11     82aa, >Antimicrobial... at 78.05%
12     82aa, >Antimicrobial... at 73.17%
13     82aa, >Antimicrobial... *

```

```

14    83aa, >Antimicrobial... at 56.63%
15    54aa, >Antimicrobial... at 46.30%
16    54aa, >Antimicrobial... at 70.37%
17    54aa, >Antimicrobial... at 75.93%
18    83aa, >antibacterial06742... at 54.22%
19    82aa, >antibacterial06743... at 74.39%
>Cluster 427
0      86aa, >Antimicrobial... *
1      65aa, >Antimicrobial... at 61.54%
2      18aa, >antibacterial11531... at 44.44%
>Cluster 428
0      86aa, >antibacterial06465... *
1      86aa, >antibacterial06466... at 73.26%
>Cluster 429
0      86aa, >antibacterial06818... *
1      26aa, >antibacterial09000... at 42.31%
2      24aa, >antibacterial110363... at 41.67%
>Cluster 430
0      86aa, >antibacterial06847... *
1      24aa, >antibacterial07472... at 41.67%
2      20aa, >antibacterial09105... at 35.00%
>Cluster 431
0      38aa, >antimicrobial... at 42.11%
1      86aa, >antibacterial06871... *
2      82aa, >antibacterial06872... at 65.85%
>Cluster 432
0      37aa, >antibacterial;antim... at 43.24%
1      42aa, >antimicrobial... at 40.48%
2      86aa, >antibacterial06919... *
>Cluster 433
0      81aa, >antibacterial06720... at 44.44%
1      82aa, >antibacterial06769... at 45.12%
2      85aa, >antibacterial06783... at 43.53%
3      86aa, >antibacterial07134... *
4      84aa, >antibacterial07232... at 44.05%
5      86aa, >antibacterial07451... at 40.70%
6      86aa, >antibacterial07452... at 41.86%
7      84aa, >antibacterial07503... at 50.00%
8      21aa, >antibacterial110372... at 42.86%
9      35aa, >antibacterial112928... at 35.00%
>Cluster 434
0      21aa, >Antimicrobial... at 42.86%
1      86aa, >antibacterial07153... *
>Cluster 435
0      84aa, >antibacterial07141... at 46.43%
1      86aa, >antibacterial07251... *
2      20aa, >antibacterial08254... at 35.00%
>Cluster 436
0      86aa, >antibacterial08551... *
>Cluster 437
0      24aa, >antimicrobial... at 41.67%
1      85aa, >Antimicrobial... *
>Cluster 438
0      85aa, >Antimicrobial... *

```

```

>Cluster 439
0      44aa, >antimicrobial... at 40.91%
1      22aa, >antimicrobial... at 40.91%
2      85aa, >Antimicrobial... *
3      27aa, >antibacterial07309... at 40.74%
4      20aa, >antibacterial07331... at 35.00%
5      11aa, >antibacterial10659... at 45.45%
6      84aa, >antibacterial10824... at 67.86%
7      19aa, >antibacterial11462... *
8      23aa, >antibacterial113042... at 43.48%
>Cluster 440
0      85aa, >antibacterial06449... *
1      70aa, >antibacterial06450... at 70.00%
>Cluster 441
0      78aa, >antibacterial06451... at 43.59%
1      74aa, >antibacterial06477... at 40.54%
2      76aa, >antibacterial06755... at 44.74%
3      85aa, >antibacterial06781... *
4      74aa, >antibacterial06938... at 40.54%
5      77aa, >antibacterial07132... at 40.26%
6      25aa, >antibacterial08067... at 35.00%
7      24aa, >antibacterial08145... at 41.67%
8      35aa, >antibacterial08883... at 42.86%
9      27aa, >antibacterial08926... at 40.74%
10     18aa, >antibacterial09202... at 44.44%
>Cluster 442
0      83aa, >antibacterial06765... at 46.99%
1      85aa, >antibacterial06864... *
2      85aa, >antibacterial06865... at 80.00%
3      83aa, >antibacterial07142... at 40.96%
4      84aa, >antibacterial07146... at 41.67%
5      85aa, >antibacterial07154... at 50.59%
>Cluster 443
0      30aa, >Antimicrobial... at 35.00%
1      85aa, >antibacterial06909... *
2      35aa, >antibacterial112096... at 35.00%
>Cluster 444
0      17aa, >antimicrobial... at 41.18%
1      85aa, >antibacterial07174... *
>Cluster 445
0      85aa, >antibacterial07242... *
>Cluster 446
0      85aa, >antibacterial07525... *
1      24aa, >antibacterial112399... at 41.67%
>Cluster 447
0      85aa, >antibacterial110814... *
>Cluster 448
0      33aa, >Antifungal... at 42.42%
1      85aa, >antibacterial111095... *
2      17aa, >antibacterial112345... at 41.18%
>Cluster 449
0      83aa, >Antimicrobial... at 59.04%
1      84aa, >Antibacterial;Antif... *
2      76aa, >Antimicrobial... at 42.11%

```

```

3      76aa, >Antibacterial... at 47.37%
4      52aa, >Antibacterial... at 65.38%
5      24aa, >antimicrobial... at 41.67%
6      32aa, >antibacterial11656... at 40.62%
>Cluster 450
0      84aa, >Antimicrobial... *
1      13aa, >anti-Gram-;antibact... at 53.85%
>Cluster 451
0      41aa, >Antimicrobial... *
1      37aa, >Antimicrobial... at 43.24%
2      38aa, >antimicrobial... at 42.11%
3      37aa, >Antimicrobial... at 40.54%
4      84aa, >Antimicrobial... *
5      84aa, >Antimicrobial... at 46.43%
6      39aa, >antimicrobial... at 41.03%
7      39aa, >antimicrobial... at 41.03%
8      34aa, >antimicrobial... at 44.12%
9      17aa, >antibacterial08240... at 41.18%
10     20aa, >antibacterial09122... at 35.00%
>Cluster 452
0      80aa, >Antimicrobial... at 76.25%
1      84aa, >Antimicrobial... *
2      25aa, >antibacterial;antif... at 44.00%
3      26aa, >antibacterial09849... at 50.00%
4      30aa, >antibacterial09851... at 83.33%
5      74aa, >antibacterial10985... at 68.92%
6      74aa, >antibacterial10986... at 64.86%
>Cluster 453
0      53aa, >Antimicrobial... at 50.38%
1      44aa, >Antimicrobial... at 43.18%
2      45aa, >antibacterial;Antif... at 42.22%
3      51aa, >Antimicrobial... at 56.67%
4      51aa, >Antimicrobial... at 58.63%
5      51aa, >Antimicrobial... *
6      51aa, >Antimicrobial... at 70.20%
7      69aa, >Antimicrobial... at 40.58%
8      65aa, >Antimicrobial... at 35.00%
9      84aa, >Antimicrobial... *
10     51aa, >Antimicrobial... at 78.43%
11     51aa, >Antimicrobial... at 68.63%
12     54aa, >Antimicrobial... at 75.19%
13     51aa, >Antimicrobial... at 58.82%
14     58aa, >Antimicrobial... at 50.34%
>Cluster 454
0      37aa, >Gram-... at 40.54%
1      69aa, >anti-Gram+;Antibact... at 46.38%
2      30aa, >Antibacterial;Antif... at 43.33%
3      28aa, >Antimicrobial... at 42.86%
4      34aa, >Antimicrobial;Gram-... at 52.94%
5      34aa, >anti-Gram+;Antimicr... at 47.06%
6      84aa, >antibacterial06630... *
7      63aa, >antibacterial06634... *
8      18aa, >antibacterial08511... at 44.44%
9      33aa, >antibacterial11806... at 42.42%

```

```

10    43aa, >antibacterial112191... at 41.86%
11    27aa, >antibacterial112391... at 44.44%
>Cluster 455
0     84aa, >antibacterial06734... *
1     71aa, >antibacterial07136... at 50.70%
>Cluster 456
0     61aa, >Antimicrobial... at 50.82%
1     35aa, >Antimicrobial... at 65.71%
2     24aa, >anti-Gram+;Antibact... at 41.67%
3     43aa, >Antimicrobial... at 55.81%
4     41aa, >Antimicrobial... at 56.10%
5     41aa, >Antimicrobial... at 60.73%
6     41aa, >Antimicrobial... at 58.54%
7     84aa, >antibacterial06849... *
8     15aa, >antibacterial112501... at 35.00%
9     12aa, >antibacterial112592... at 41.67%
>Cluster 457
0     84aa, >antibacterial07486... *
1     19aa, >antibacterial08055... at 42.11%
>Cluster 458
0     24aa, >Antimicrobial... at 41.67%
1     20aa, >Antibacterial... at 35.00%
2     24aa, >antimicrobial... at 41.67%
3     24aa, >antibacterial;Antif... at 41.67%
4     24aa, >Antibacterial;Antif... at 41.67%
5     24aa, >Antibacterial;Antif... at 50.00%
6     24aa, >antimicrobial... at 41.67%
7     84aa, >antibacterial07494... *
>Cluster 459
0     23aa, >anti-Gram+;Antibact... at 43.48%
1     36aa, >Antimicrobial... at 44.44%
2     84aa, >antibacterial110812... *
>Cluster 460
0     84aa, >antibacterial111010... *
1     74aa, >antibacterial111011... at 75.68%
>Cluster 461
0     28aa, >antimicrobial;antiv... at 42.86%
1     84aa, >antibacterial111060... *
>Cluster 462
0     83aa, >Antimicrobial... *
1     68aa, >Antimicrobial... at 41.18%
2     49aa, >Antimicrobial... at 44.90%
3     29aa, >antibacterial112918... at 41.38%
>Cluster 463
0     83aa, >Antibacterial;Antif... *
1     26aa, >antibacterial113080... at 78.31%
>Cluster 464
0     41aa, >anti-Gram+;antibact... at 41.46%
1     81aa, >Antimicrobial... at 74.07%
2     83aa, >Antimicrobial... *
3     29aa, >antibacterial06891... at 38.38%
>Cluster 465
0     43aa, >Antimicrobial... at 60.47%
1     60aa, >Antibacterial... at 43.33%

```

```

2    44aa, >Antimicrobial... at 70.45%
3    44aa, >Antibacterial;Antif... at 77.27%
4    44aa, >Antibacterial;antif... at 65.91%
5    28aa, >antimicrobial... at 42.86%
6    43aa, >anti-Gram+;antifung... at 74.42%
7    83aa, >Antimicrobial... *
8    33aa, >anti-Gram+;Antibact... at 42.42%
9    24aa, >antibacterial08280... at 41.67%
10   82aa, >antibacterial11059... at 74.39%
>Cluster 466
0    27aa, >antibacterial;Antif... at 44.44%
1    83aa, >Antimicrobial... *
>Cluster 467
0    47aa, >antibacterial;antim... at 48.94%
1    46aa, >Antibacterial;Antif... at 43.48%
2    45aa, >antifungal;antimicr... at 35.00%
3    44aa, >antimicrobial... at 43.18%
4    42aa, >antifungal;antimicr... at 42.86%
5    42aa, >antimicrobial... at 40.48%
6    48aa, >antifungal;antimicr... at 41.67%
7    39aa, >antimicrobial... at 46.15%
8    50aa, >antifungal;antimicr... at 35.00%
9    49aa, >antimicrobial... at 42.86%
10   50aa, >Antifungal... at 35.00%
11   45aa, >antifungal;antimicr... at 35.00%
12   47aa, >antibacterial;antim... at 48.94%
13   47aa, >antimicrobial;Antim... *
14   47aa, >antifungal;antimicr... at 55.32%
15   47aa, >Antimicrobial;Antim... at 40.43%
16   47aa, >antimicrobial... at 51.06%
17   47aa, >antimicrobial... at 57.45%
18   47aa, >antimicrobial... at 48.94%
19   47aa, >Antimicrobial... at 40.43%
20   49aa, >antimicrobial... at 46.94%
21   49aa, >Antifungal;antimicr... at 57.14%
22   83aa, >antibacterial06709... *
23   64aa, >antibacterial07175... at 40.62%
24   47aa, >antibacterial07339... at 53.19%
25   45aa, >antibacterial07340... at 57.78%
26   46aa, >antibacterial07341... at 50.00%
27   45aa, >antibacterial07342... at 44.44%
28   46aa, >antibacterial07343... at 52.17%
29   49aa, >antibacterial07419... at 55.10%
30   51aa, >antibacterial08530... at 41.18%
31   47aa, >antibacterial08830... at 44.68%
32   83aa, >antibacterial10976... at 78.31%
>Cluster 468
0    31aa, >Antimicrobial... at 41.94%
1    24aa, >antibacteria;Antiba... at 45.83%
2    66aa, >anti-Gram-;antifung... at 57.58%
3    83aa, >antibacterial06758... *
>Cluster 469
0    40aa, >antimicrobial... at 35.00%
1    38aa, >antibacterial;antim... at 52.63%

```

```

2    38aa, >antimicrobial... at 47.37%
3    38aa, >antifungal;antimicr... at 60.53%
4    38aa, >Antimicrobial... at 63.16%
5    43aa, >anti-Gram+;antibact... at 53.49%
6    43aa, >anti-Gram+;antibact... at 55.81%
7    38aa, >Antifungal;antimicr... at 55.26%
8    44aa, >anti-Gram+;antimicr... at 54.55%
9    43aa, >anti-Gram+;antibact... at 53.49%
10   40aa, >antimicrobial... at 42.50%
11   38aa, >antifungal;antimicr... at 47.37%
12   26aa, >Antimicrobial... at 53.85%
13   82aa, >Antimicrobial... *
14   52aa, >antibacterial07307... at 46.15%
15   38aa, >antibacterial08796... at 57.89%
16   60aa, >antibacterial10771... at 80.00%
>Cluster 470
0    82aa, >Antimicrobial... *
1    19aa, >antibacterial09982... at 42.11%
2    30aa, >antibacterial10887... at 35.00%
3    18aa, >antibacterial12924... at 44.44%
>Cluster 471
0    71aa, >Antimicrobial... at 40.85%
1    71aa, >Antimicrobial... at 45.07%
2    82aa, >Antimicrobial... *
3    75aa, >antibacterial06716... at 44.00%
4    19aa, >antibacterial08580... at 47.37%
5    80aa, >antibacterial10969... at 35.00%
>Cluster 472
0    31aa, >antimicrobial... at 41.94%
1    82aa, >antiviral... *
2    82aa, >antibacterial07491... at 53.66%
>Cluster 473
0    33aa, >Antibacterial;antim... at 42.42%
1    82aa, >antibacterial10818... *
>Cluster 474
0    81aa, >anti-Gram+;Antibact... *
>Cluster 475
0    81aa, >Antimicrobial... *
1    76aa, >Antimicrobial... at 52.63%
2    76aa, >Antimicrobial... at 47.37%
3    67aa, >Antimicrobial... at 41.79%
4    67aa, >Antimicrobial... at 44.78%
5    67aa, >Antimicrobial... at 43.28%
6    77aa, >Antimicrobial... at 46.75%
7    68aa, >Antimicrobial... at 44.12%
8    20aa, >antibacterial08364... at 35.00%
>Cluster 476
0    40aa, >antibacterial;antif... at 42.50%
1    40aa, >anti-Gram-;antibact... *
2    45aa, >Antibacterial... at 73.78%
3    40aa, >anti-Gram+;antibact... at 72.50%
4    34aa, >anti-Gram+;Antibact... *
5    40aa, >anti-Gram-;antibact... at 80.00%
6    81aa, >Antimicrobial... *

```

```

7      63aa, >Antimicrobial... at 42.86%
8      63aa, >Antimicrobial... at 55.56%
9      64aa, >Antimicrobial... at 54.69%
10     64aa, >Antimicrobial... at 56.25%
11     63aa, >Antimicrobial... at 63.49%
12     63aa, >Antimicrobial... at 58.73%
13     63aa, >Antimicrobial... at 57.14%
14     37aa, >antibacterial06627... at 45.95%
15     30aa, >antibacterial06657... at 35.00%
16     63aa, >antibacterial06922... at 57.14%
17     63aa, >antibacterial06923... at 55.56%
18     63aa, >antibacterial06924... at 63.49%
19     63aa, >antibacterial07116... at 58.73%
20     37aa, >antibacterial07562... at 40.54%
21     39aa, >antibacterial08828... at 51.28%
22     41aa, >antibacterial09770... at 63.41%
23     27aa, >antibacterial10613... at 44.44%
24     64aa, >antibacterial11046... at 54.69%
25     63aa, >antibacterial11054... at 55.56%
26     63aa, >antibacterial11055... at 53.97%
27     63aa, >antibacterial11056... at 61.90%
28     63aa, >antibacterial11057... at 61.90%
>Cluster 477
0      27aa, >Antibacterial... at 40.74%
1      54aa, >anti-Gram-... at 70.37%
2      81aa, >Antimicrobial... *
3      46aa, >Antimicrobial... at 60.87%
4      22aa, >antimicrobial... at 40.91%
5      41aa, >Antibacterial;Antim... at 41.46%
>Cluster 478
0      52aa, >Antimicrobial... at 67.31%
1      41aa, >antifungal;antimicr... at 41.46%
2      56aa, >Antimicrobial... at 50.00%
3      53aa, >Antimicrobial... at 45.28%
4      74aa, >Antibacterial... at 43.24%
5      45aa, >Antimicrobial... at 83.33%
6      81aa, >Antimicrobial... *
>Cluster 479
0      46aa, >Antimicrobial... at 54.35%
1      46aa, >Antimicrobial... at 56.52%
2      46aa, >Antimicrobial... at 58.70%
3      59aa, >Antimicrobial... at 52.54%
4      59aa, >Antimicrobial... at 57.63%
5      44aa, >Antimicrobial... at 65.91%
6      48aa, >Antimicrobial... at 52.08%
7      47aa, >Antimicrobial... at 55.32%
8      53aa, >Antimicrobial... at 66.04%
9      59aa, >Antibacterial;Antim... at 79.66%
10     42aa, >Antimicrobial... at 57.14%
11     41aa, >Antimicrobial... at 41.46%
12     40aa, >Antimicrobial... at 50.00%
13     46aa, >Antimicrobial... at 52.17%
14     66aa, >antibacterial06863... at 40.91%
15     79aa, >antibacterial06875... at 84.81%

```



```

16      81aa, >antibacterial06876... *
17      65aa, >antibacterial07198... at 60.00%
18      30aa, >antibacterial09010... at 35.00%
19      40aa, >antibacterial11100... at 50.00%
>Cluster 480
0       27aa, >antibacterial;antif... at 40.74%
1       81aa, >antibacterial07300... *
2       34aa, >antibacterial07877... at 41.18%
3       20aa, >antibacterial09110... at 45.00%
>Cluster 481
0       23aa, >anti-Gram-;antifung... at 43.48%
1       58aa, >antibacterial... at 63.79%
2       26aa, >antifungal... at 42.31%
3       32aa, >antibacterial09621... at 62.50%
4       81aa, >antibacterial11067... *
5       24aa, >antibacterial12919... at 45.83%
>Cluster 482
0       29aa, >anti-Gram+;Antibact... at 41.38%
1       74aa, >Antimicrobial... at 41.89%
2       76aa, >Antimicrobial... at 60.53%
3       80aa, >Antimicrobial... *
4       58aa, >Antimicrobial... at 51.72%
5       74aa, >Antimicrobial... at 40.54%
6       22aa, >anti-Gram+;antibact... at 40.91%
>Cluster 483
0       48aa, >Antimicrobial... at 43.75%
1       44aa, >Antimicrobial... at 45.45%
2       41aa, >Antimicrobial... at 51.22%
3       42aa, >Antimicrobial... at 47.62%
4       24aa, >anti-Gram+;Antibact... at 45.83%
5       37aa, >antimicrobial... at 54.05%
6       33aa, >anti-Gram+;antibact... at 42.42%
7       30aa, >antimicrobial... at 35.00%
8       29aa, >antimicrobial... at 44.83%
9       28aa, >antimicrobial... at 46.43%
10      29aa, >Antimicrobial... at 48.28%
11      29aa, >anti-Gram+;Antibact... at 44.83%
12      29aa, >Antimicrobial... at 41.38%
13      34aa, >antibacterial;antim... at 47.06%
14      28aa, >antimicrobial... at 60.71%
15      28aa, >antifungal;antimicr... at 57.14%
16      37aa, >antimicrobial... at 70.27%
17      37aa, >antibacterial;Antif... at 45.95%
18      37aa, >Antimicrobial... at 56.76%
19      37aa, >anti-Gram+;antibact... at 56.76%
20      37aa, >antimicrobial... at 67.57%
21      37aa, >anti-Gram+;antibact... at 70.27%
22      37aa, >Antimicrobial... at 62.16%
23      37aa, >anti-Gram+;antibact... at 70.27%
24      37aa, >antimicrobial... at 70.27%
25      28aa, >anti-Gram+;antibact... at 57.14%
26      33aa, >antimicrobial... at 45.45%
27      37aa, >anti-Gram+;Antibact... at 51.35%
28      37aa, >Antimicrobial... at 59.46%

```

29 37aa, >Antimicrobial... at 70.27%  
30 36aa, >Antimicrobial... at 63.89%  
31 32aa, >anti-Gram+;Antibact... at 53.12%  
32 33aa, >antibacterial;antim... at 45.45%  
33 28aa, >antifungal;antimicr... at 53.57%  
34 28aa, >anti-Gram-;antimicr... at 46.43%  
35 28aa, >Antibacterial;Antif... at 57.14%  
36 28aa, >antibacterial;antif... at 53.57%  
37 28aa, >antibacterial;antif... at 53.57%  
38 28aa, >anti-Gram+;Antimicr... at 50.00%  
39 33aa, >anti-Gram+;antibact... at 42.42%  
40 37aa, >anti-Gram+;Antibact... at 51.35%  
41 37aa, >anti-Gram+;Antibact... at 56.76%  
42 49aa, >Gram-... at 40.82%  
43 37aa, >antimicrobial... at 64.86%  
44 37aa, >anti-Gram+;Antibact... at 62.16%  
45 28aa, >antibacterial;antim... at 50.00%  
46 28aa, >anti-Gram-;antibact... at 42.86%  
47 28aa, >anti-Gram-;antibact... at 42.86%  
48 57aa, >Antimicrobial... at 52.63%  
49 66aa, >Antimicrobial... at 63.64%  
50 66aa, >Antimicrobial... \*  
51 58aa, >Antimicrobial... at 55.17%  
52 60aa, >Antimicrobial... at 58.33%  
53 37aa, >antimicrobial... at 51.35%  
54 66aa, >Antimicrobial... at 53.03%  
55 73aa, >Antimicrobial... at 42.47%  
56 72aa, >Antimicrobial... at 43.06%  
57 75aa, >Antimicrobial... at 35.00%  
58 76aa, >Antimicrobial... at 46.05%  
59 67aa, >Antimicrobial... at 61.19%  
60 71aa, >Antimicrobial... at 53.52%  
61 76aa, >Antimicrobial... at 55.26%  
62 75aa, >Antimicrobial... at 60.00%  
63 76aa, >Antimicrobial... at 56.58%  
64 71aa, >Antimicrobial... at 49.30%  
65 78aa, >Antimicrobial... at 69.23%  
66 72aa, >Antimicrobial... at 51.39%  
67 70aa, >Antimicrobial... at 47.14%  
68 70aa, >Antimicrobial... at 48.57%  
69 78aa, >Antimicrobial... at 43.59%  
70 76aa, >Antimicrobial... at 59.21%  
71 71aa, >Antimicrobial... at 59.15%  
72 76aa, >Antimicrobial... at 64.47%  
73 76aa, >Antimicrobial... at 59.21%  
74 76aa, >Antimicrobial... at 57.89%  
75 75aa, >Antimicrobial... at 60.00%  
76 71aa, >Antimicrobial... at 61.97%  
77 75aa, >Antimicrobial... at 58.67%  
78 78aa, >Antimicrobial... at 73.08%  
79 76aa, >Antimicrobial... at 67.11%  
80 72aa, >Antibacterial... at 59.72%  
81 63aa, >Antimicrobial... at 49.21%  
82 73aa, >Antimicrobial... at 49.32%

|     |                         |           |
|-----|-------------------------|-----------|
| 83  | 67aa, >Antimicrobial... | at 47.76% |
| 84  | 67aa, >Antimicrobial... | at 53.73% |
| 85  | 70aa, >Antimicrobial... | at 52.86% |
| 86  | 77aa, >Antimicrobial... | at 49.35% |
| 87  | 71aa, >Antimicrobial... | at 50.70% |
| 88  | 71aa, >Antimicrobial... | at 49.30% |
| 89  | 71aa, >Antimicrobial... | at 46.48% |
| 90  | 70aa, >Antimicrobial... | at 47.14% |
| 91  | 68aa, >Antimicrobial... | at 48.53% |
| 92  | 72aa, >Antimicrobial... | at 52.78% |
| 93  | 75aa, >Antimicrobial... | at 60.00% |
| 94  | 69aa, >Antimicrobial... | at 62.32% |
| 95  | 75aa, >Antimicrobial... | at 58.67% |
| 96  | 66aa, >Antimicrobial... | at 48.48% |
| 97  | 71aa, >Antimicrobial... | at 64.79% |
| 98  | 72aa, >Antimicrobial... | at 56.94% |
| 99  | 72aa, >Antimicrobial... | at 54.17% |
| 100 | 78aa, >Antimicrobial... | at 76.92% |
| 101 | 75aa, >Antimicrobial... | at 60.00% |
| 102 | 76aa, >Antimicrobial... | at 61.84% |
| 103 | 78aa, >Antimicrobial... | at 75.64% |
| 104 | 74aa, >Antimicrobial... | at 66.22% |
| 105 | 70aa, >Antimicrobial... | at 47.14% |
| 106 | 75aa, >Antimicrobial... | at 57.33% |
| 107 | 75aa, >Antimicrobial... | at 57.33% |
| 108 | 74aa, >Antimicrobial... | at 54.05% |
| 109 | 63aa, >Antimicrobial... | at 55.56% |
| 110 | 78aa, >Antimicrobial... | at 71.79% |
| 111 | 72aa, >Antimicrobial... | at 58.33% |
| 112 | 71aa, >Antimicrobial... | at 49.30% |
| 113 | 76aa, >Antimicrobial... | at 73.68% |
| 114 | 70aa, >Antimicrobial... | at 62.86% |
| 115 | 71aa, >Antimicrobial... | at 61.97% |
| 116 | 72aa, >Antimicrobial... | at 52.78% |
| 117 | 72aa, >Antimicrobial... | at 51.39% |
| 118 | 75aa, >Antimicrobial... | at 48.00% |
| 119 | 72aa, >Antimicrobial... | at 58.33% |
| 120 | 70aa, >Antimicrobial... | at 45.71% |
| 121 | 70aa, >Antimicrobial... | at 48.57% |
| 122 | 76aa, >Antimicrobial... | at 64.47% |
| 123 | 74aa, >Antimicrobial... | at 63.51% |
| 124 | 76aa, >Antimicrobial... | at 64.47% |
| 125 | 65aa, >Antimicrobial... | at 49.23% |
| 126 | 70aa, >Antimicrobial... | at 65.71% |
| 127 | 71aa, >Antimicrobial... | at 53.52% |
| 128 | 69aa, >Antimicrobial... | at 49.28% |
| 129 | 63aa, >Antimicrobial... | at 60.32% |
| 130 | 66aa, >Antimicrobial... | at 50.00% |
| 131 | 76aa, >Antimicrobial... | at 69.74% |
| 132 | 76aa, >Antimicrobial... | at 56.58% |
| 133 | 73aa, >Antimicrobial... | at 61.64% |
| 134 | 78aa, >Antimicrobial... | at 71.79% |
| 135 | 76aa, >Antimicrobial... | at 59.21% |
| 136 | 76aa, >Antimicrobial... | at 68.42% |

```

137 73aa, >Antimicrobial... at 57.53%
138 70aa, >Antimicrobial... at 47.14%
139 74aa, >Antimicrobial... at 58.11%
140 70aa, >Antimicrobial... at 48.57%
141 74aa, >Antimicrobial... at 60.81%
142 74aa, >Antimicrobial... at 64.86%
143 80aa, >Antimicrobial... *
144 40aa, >Antimicrobial... at 52.50%
145 71aa, >Antimicrobial... at 53.52%
146 30aa, >Antimicrobial... at 35.00%
147 37aa, >Antibacterial;Antif... at 54.05%
148 45aa, >Antimicrobial... at 60.00%
149 46aa, >Antimicrobial... at 52.17%
150 30aa, >antimicrobial... at 43.33%
151 34aa, >antibacterial... at 47.06%
152 80aa, >antibacterial06714... at 35.00%
153 71aa, >antibacterial06788... at 56.34%
154 80aa, >antibacterial06789... at 57.50%
155 80aa, >antibacterial07088... at 43.75%
156 33aa, >antibacterial07471... at 48.48%
157 25aa, >antibacterial07483... at 52.00%
158 25aa, >antibacterial09100... at 35.00%
159 25aa, >antibacterial09101... at 35.00%
160 28aa, >antibacterial09501... at 46.43%
161 33aa, >antibacterial10106... at 42.42%
162 76aa, >antibacterial10972... at 40.79%
163 74aa, >antibacterial10974... at 41.89%
164 72aa, >antibacterial10996... at 61.11%
165 37aa, >antibacterial11845... at 48.65%
>Cluster 484
0 66aa, >Antimicrobial... at 46.97%
1 80aa, >Antimicrobial... *
2 13aa, >antibacterial08024... at 53.85%
3 11aa, >antibacterial08113... at 45.45%
4 23aa, >antibacterial112533... at 43.48%
5 19aa, >antibacterial113135... at 42.11%
>Cluster 485
0 80aa, >Antimicrobial... *
>Cluster 486
0 80aa, >Antimicrobial... *
>Cluster 487
0 80aa, >Antimicrobial... *
>Cluster 488
0 47aa, >Antifungal;antimicr... at 57.45%
1 49aa, >Antifungal... at 37.35%
2 47aa, >antifungal;Antimicr... *
3 48aa, >antifungal;Antimicr... at 79.17%
4 47aa, >antimicrobial... at 46.81%
5 80aa, >Antimicrobial... *
6 70aa, >antibacterial06756... at 41.43%
7 47aa, >antibacterial07831... at 69.36%
8 47aa, >antibacterial07832... at 69.36%
9 47aa, >antibacterial07833... at 82.49%
10 47aa, >antibacterial07834... at 82.49%

```

```

11    48aa, >antibacterial07835... at 82.49%
12    46aa, >antibacterial08526... at 76.98%
>Cluster 489
0     49aa, >Antimicrobial... at 40.82%
1     55aa, >antibacterial... at 45.45%
2     50aa, >antibacterial;Antif... at 52.00%
3     50aa, >Antifungal... at 48.00%
4     19aa, >antimicrobial... at 32.11%
5     24aa, >antibacterial;Antif... at 35.00%
6     50aa, >anti-Gram+;Antibact... *
7     50aa, >antifungal;antimicr... at 48.00%
8     50aa, >antifungal;antimicr... at 38.00%
9     49aa, >antifungal;antimicr... at 46.94%
10    50aa, >antifungal;antimicr... at 42.00%
11    50aa, >antibacterial;antif... at 54.00%
12    52aa, >antibacterial... at 57.69%
13    50aa, >antifungal;antimicr... at 35.00%
14    51aa, >antifungal;antimicr... at 47.06%
15    52aa, >Antifungal... at 76.92%
16    51aa, >Antifungal;antimicr... *
17    50aa, >Antifungal;antimicr... at 76.00%
18    80aa, >antibacterial06723... *
19    80aa, >antibacterial06724... at 48.75%
20    78aa, >antibacterial06768... at 43.59%
21    23aa, >antibacterial06969... at 43.48%
22    80aa, >antibacterial07089... at 82.75%
23    80aa, >antibacterial07090... at 86.25%
24    79aa, >antibacterial07091... at 82.14%
25    80aa, >antibacterial07092... *
26    79aa, >antibacterial07093... at 80.61%
27    70aa, >antibacterial07094... at 80.57%
28    80aa, >antibacterial07096... *
29    80aa, >antibacterial07097... at 86.25%
30    75aa, >antibacterial07102... at 35.00%
31    24aa, >antibacterial09037... at 41.67%
32    51aa, >antibacterial09052... *
33    75aa, >antibacterial09150... at 35.00%
>Cluster 490
0     50aa, >anti-Gram+;Antibact... at 66.00%
1     62aa, >Antimicrobial... at 51.61%
2     74aa, >Antimicrobial... at 40.54%
3     65aa, >Antibacterial;Antif... at 43.08%
4     65aa, >Antimicrobial... at 35.00%
5     80aa, >antibacterial06832... *
6     67aa, >antibacterial07163... at 40.30%
7     58aa, >antibacterial07171... at 79.31%
8     65aa, >antibacterial07172... at 41.54%
>Cluster 491
0     80aa, >antibacterial06883... *
1     80aa, >antibacterial06889... at 70.00%
2     23aa, >antibacterial08095... at 42.61%
3     23aa, >antibacterial08098... *
4     23aa, >antibacterial08099... at 71.30%
5     32aa, >antibacterial10522... at 40.62%

```

```

>Cluster 492
0      48aa, >Antibacterial;Antif... at 72.92%
1      80aa, >antibacterial06910... *
2      26aa, >antibacterial09199... at 42.31%
3      26aa, >antibacterial09200... at 42.31%
>Cluster 493
0      60aa, >Antibacterial... at 58.33%
1      80aa, >antibacterial11008... *
>Cluster 494
0      79aa, >Antibacterial... *
>Cluster 495
0      69aa, >Antimicrobial... at 47.83%
1      66aa, >Antimicrobial... at 62.12%
2      79aa, >Antimicrobial... *
3      74aa, >Antimicrobial... at 64.86%
4      77aa, >Antimicrobial... at 53.25%
5      76aa, >Antimicrobial... at 42.11%
6      66aa, >antibacterial11104... at 40.91%
>Cluster 496
0      29aa, >antimicrobial... at 51.72%
1      79aa, >Antimicrobial... *
2      79aa, >Antimicrobial... at 70.89%
3      31aa, >antibacterial07445... at 51.61%
>Cluster 497
0      40aa, >antibacterial;antim... at 42.50%
1      79aa, >Antimicrobial... *
2      79aa, >antibacterial07192... at 65.82%
>Cluster 498
0      69aa, >Antimicrobial... *
1      70aa, >Antimicrobial... at 42.86%
2      72aa, >Antimicrobial... at 51.39%
3      72aa, >Antimicrobial... at 45.83%
4      79aa, >Antimicrobial... *
5      72aa, >Antimicrobial... at 52.78%
6      35aa, >Antibacterial;Antim... at 32.86%
7      30aa, >antibacterial112453... at 35.00%
>Cluster 499
0      79aa, >Antimicrobial... *
1      79aa, >Antimicrobial... at 54.43%
2      78aa, >Antimicrobial... at 52.56%
>Cluster 500
0      79aa, >antifungal;Antimicr... *
1      79aa, >Antimicrobial... at 80.41%
2      38aa, >antimicrobial... at 41.74%
3      76aa, >antibacterial07441... at 65.79%
>Cluster 501
0      23aa, >Gram-... *
1      23aa, >Antibacterial;Antif... at 81.30%
2      22aa, >Antibacterial... at 82.91%
3      67aa, >Antimicrobial... at 68.66%
4      69aa, >Antimicrobial... at 49.28%
5      68aa, >Antimicrobial... at 48.53%
6      69aa, >Antimicrobial... at 36.38%
7      41aa, >Antimicrobial... at 60.98%

```

```

8      22aa, >antibacterial09616... at 71.82%
9      22aa, >antibacterial10109... at 78.91%
10     22aa, >antibacterial10110... at 78.91%
11     11aa, >antibacterial10601... at 45.45%
12     79aa, >antibacterial10815... *
13     67aa, >antibacterial11071... at 40.75%
>Cluster 502
0      79aa, >antibacterial10836... *
>Cluster 503
0      26aa, >Antibacterial... at 42.31%
1      71aa, >antibacterial11015... at 64.79%
2      79aa, >antibacterial11016... *
3      65aa, >antibacterial11040... at 49.23%
4      40aa, >antibacterial11089... at 50.00%
5      68aa, >antibacterial11091... at 60.29%
>Cluster 504
0      28aa, >antimicrobial... at 46.43%
1      79aa, >antibacterial11090... *
>Cluster 505
0      28aa, >antimicrobial... at 50.00%
1      77aa, >Antimicrobial... at 53.25%
2      75aa, >Antimicrobial... at 50.67%
3      78aa, >Antimicrobial... *
4      31aa, >antimicrobial... at 45.16%
>Cluster 506
0      78aa, >Antimicrobial... *
>Cluster 507
0      43aa, >Antimicrobial... at 41.86%
1      45aa, >Antibacterial... at 35.00%
2      78aa, >Antimicrobial... *
3      42aa, >antibacterial10395... at 40.48%
>Cluster 508
0      78aa, >antibacterial06519... *
1      52aa, >antibacterial06520... at 84.62%
2      45aa, >antibacterial06580... at 46.67%
3      45aa, >antibacterial06959... at 35.00%
4      24aa, >antibacterial08126... at 58.33%
5      19aa, >antibacterial08204... at 42.11%
6      24aa, >antibacterial08237... at 50.00%
7      24aa, >antibacterial112687... at 45.83%
>Cluster 509
0      76aa, >antibacterial06726... at 47.37%
1      78aa, >antibacterial06860... *
>Cluster 510
0      68aa, >antibacterial06773... at 48.53%
1      65aa, >antibacterial06774... at 50.77%
2      69aa, >antibacterial06775... at 47.83%
3      78aa, >antibacterial06915... *
4      67aa, >antibacterial07100... at 55.22%
5      64aa, >antibacterial07101... at 51.56%
6      25aa, >antibacterial10256... at 35.00%
>Cluster 511
0      78aa, >antibacterial07193... *
1      17aa, >antibacterial09934... at 41.18%

```

```

2      35aa, >antibacterial10800... at 35.00%
3      18aa, >antibacterial11901... at 44.44%
>Cluster 512
0      78aa, >antibacterial07606... *
1      19aa, >antibacterial12413... at 42.11%
>Cluster 513
0      78aa, >antibacterial09484... *
>Cluster 514
0      17aa, >antibacterial... at 52.94%
1      78aa, >antibacterial10835... *
2      21aa, >antibacterial12189... at 47.62%
>Cluster 515
0      35aa, >antibacterial07082... at 35.00%
1      78aa, >antibacterial10869... *
>Cluster 516
0      48aa, >antibacterial;antif... at 75.00%
1      26aa, >antimicrobial... at 42.31%
2      20aa, >antibacterial09108... at 35.00%
3      20aa, >antibacterial09109... at 45.00%
4      78aa, >antibacterial10967... *
>Cluster 517
0      67aa, >Antibacterial... at 40.30%
1      77aa, >Antibacterial... *
>Cluster 518
0      77aa, >anti-Gram-;Antibact... *
>Cluster 519
0      76aa, >Antimicrobial... at 51.32%
1      47aa, >Antimicrobial... at 40.43%
2      53aa, >Antimicrobial... at 63.02%
3      53aa, >Antimicrobial... at 58.49%
4      52aa, >Antimicrobial... at 53.85%
5      54aa, >Antibacterial... at 45.93%
6      53aa, >Antimicrobial... at 56.60%
7      76aa, >Antimicrobial... at 75.53%
8      77aa, >Antimicrobial... *
9      77aa, >Antimicrobial... at 82.21%
10     79aa, >Antimicrobial... at 82.21%
11     54aa, >Antimicrobial... at 57.41%
12     55aa, >Antimicrobial... at 56.36%
13     53aa, >Antimicrobial... at 47.17%
>Cluster 520
0      29aa, >anti-Gram+;antibact... at 41.38%
1      69aa, >Antimicrobial... at 57.97%
2      77aa, >Antimicrobial... *
3      62aa, >Antimicrobial... at 40.32%
4      67aa, >Antimicrobial... at 43.28%
5      53aa, >Antimicrobial... at 45.28%
6      30aa, >antibacterial07361... at 35.00%
>Cluster 521
0      77aa, >Antimicrobial... *
>Cluster 522
0      29aa, >antibacterial;antim... at 41.38%
1      77aa, >Antimicrobial... *
2      23aa, >antibacterial08218... at 52.17%

```



```

3      30aa, >antibacterial113273... at 43.33%
>Cluster 523
0      50aa, >antibacterial06504... at 42.00%
1      46aa, >antibacterial06539... at 41.30%
2      77aa, >antibacterial06693... *
3      49aa, >antibacterial06694... at 77.55%
4      49aa, >antibacterial06936... at 40.82%
5      45aa, >antibacterial06957... at 44.44%
6      46aa, >antibacterial06958... at 43.48%
7      46aa, >antibacterial07077... at 43.48%
8      47aa, >antibacterial07283... at 46.81%
9      22aa, >antibacterial113382... at 40.91%
>Cluster 524
0      37aa, >Antimicrobial... at 64.86%
1      77aa, >antibacterial06784... *
2      12aa, >antibacterial09947... at 41.67%
>Cluster 525
0      77aa, >antibacterial06862... *
>Cluster 526
0      48aa, >Antibacterial;Antim... at 41.67%
1      69aa, >antibacterial06882... at 42.03%
2      69aa, >antibacterial07111... at 40.58%
3      67aa, >antibacterial07203... at 58.21%
4      77aa, >antibacterial07204... *
5      73aa, >antibacterial07205... at 75.34%
6      71aa, >antibacterial07206... at 57.75%
7      71aa, >antibacterial07207... at 50.70%
>Cluster 527
0      77aa, >antibacterial07462... *
1      17aa, >antibacterial08394... at 64.71%
>Cluster 528
0      77aa, >antibacterial110352... *
>Cluster 529
0      77aa, >antibacterial110862... *
>Cluster 530
0      76aa, >Antimicrobial... *
1      75aa, >Antimicrobial... at 58.00%
2      50aa, >Antimicrobial... at 86.00%
>Cluster 531
0      76aa, >Antimicrobial... *
1      64aa, >Antimicrobial... at 42.19%
>Cluster 532
0      64aa, >Antimicrobial... at 40.62%
1      76aa, >Antimicrobial... *
2      76aa, >Antimicrobial... at 84.21%
>Cluster 533
0      49aa, >antimicrobial... at 42.86%
1      76aa, >Antifungal... *
>Cluster 534
0      70aa, >Antimicrobial... at 45.71%
1      55aa, >Antimicrobial... at 47.27%
2      71aa, >Antimicrobial... at 52.11%
3      71aa, >Antimicrobial... at 76.06%
4      76aa, >Antimicrobial... *

```

```

5      71aa, >Antimicrobial... at 52.11%
6      72aa, >Antimicrobial... at 50.00%
7      71aa, >Antibacterial... at 50.70%
8      76aa, >Antimicrobial... at 73.68%
9      71aa, >Antimicrobial... at 47.89%
10     72aa, >Antimicrobial... at 50.00%
11     74aa, >Antimicrobial... at 52.70%
12     69aa, >Antimicrobial... at 43.48%
13     71aa, >Antimicrobial... at 49.30%
14     48aa, >antibacterial;antim... at 41.67%
>Cluster 535
0      64aa, >Antimicrobial... at 40.62%
1      61aa, >Antimicrobial... at 40.98%
2      73aa, >Antimicrobial... at 53.42%
3      59aa, >Antimicrobial... at 42.37%
4      70aa, >Antimicrobial... at 67.14%
5      76aa, >Antimicrobial... *
6      72aa, >Antimicrobial... at 61.11%
>Cluster 536
0      53aa, >Antimicrobial... at 47.17%
1      53aa, >anti-Gram-;Antibact... at 79.25%
2      40aa, >antimicrobial... at 35.00%
3      76aa, >Antimicrobial... *
>Cluster 537
0      72aa, >Antimicrobial... at 44.44%
1      76aa, >Antimicrobial... *
>Cluster 538
0      76aa, >antibacterial;Antif... *
>Cluster 539
0      76aa, >antibacterial06555... *
>Cluster 540
0      38aa, >antibacterial;antim... at 52.63%
1      38aa, >anti-Gram+;Antibact... at 52.63%
2      39aa, >Antimicrobial... at 82.18%
3      39aa, >antimicrobial... *
4      38aa, >antimicrobial... at 52.63%
5      76aa, >antibacterial06892... *
6      73aa, >antibacterial07127... at 42.47%
7      74aa, >antibacterial07157... at 47.30%
8      18aa, >antibacterial08103... at 44.44%
9      20aa, >antibacterial09148... at 35.00%
>Cluster 541
0      76aa, >antibacterial07223... *
1      67aa, >antibacterial07261... at 68.66%
2      59aa, >antibacterial10935... at 66.10%
>Cluster 542
0      74aa, >anti-Gram+;Antibact... at 62.16%
1      76aa, >antibacterial10764... *
2      76aa, >antibacterial10822... at 52.63%
>Cluster 543
0      75aa, >Antimicrobial... *
1      73aa, >Antimicrobial... at 84.93%
2      24aa, >antimicrobial... at 41.67%
3      25aa, >antibacterial... at 35.00%

```

```

4      31aa, >antibacterial07040... at 45.16%
>Cluster 544
0      66aa, >Antimicrobial... at 81.82%
1      75aa, >Antimicrobial... *
2      61aa, >Antimicrobial... at 68.85%
3      66aa, >Antimicrobial... at 53.03%
4      47aa, >Antimicrobial... at 42.55%
5      44aa, >Antimicrobial... at 40.91%
6      45aa, >Antimicrobial... at 44.44%
7      68aa, >Antimicrobial... at 57.35%
8      68aa, >Antimicrobial;Antim... at 58.82%
9      68aa, >Antimicrobial... at 57.35%
>Cluster 545
0      37aa, >anti-Gram+;antifung... at 40.54%
1      75aa, >anti-Gram-;Antibact... *
2      32aa, >antimicrobial... at 43.75%
3      18aa, >antibacterial09174... at 50.00%
>Cluster 546
0      22aa, >anti-Gram+;Gram-... at 40.91%
1      69aa, >Antimicrobial... at 69.57%
2      69aa, >Antibacterial... at 85.51%
3      71aa, >Antimicrobial... at 84.51%
4      75aa, >Antimicrobial... *
5      23aa, >anti-Gram+;Antimicr... at 43.48%
>Cluster 547
0      75aa, >Antimicrobial... *
1      73aa, >Antibacterial;Antif... at 81.78%
2      54aa, >antibacterial07329... at 41.85%
3      65aa, >antibacterial07330... at 50.77%
>Cluster 548
0      75aa, >Antimicrobial... *
>Cluster 549
0      69aa, >Antimicrobial... at 40.58%
1      68aa, >Antimicrobial... at 45.59%
2      75aa, >Antimicrobial... *
>Cluster 550
0      75aa, >Antimicrobial... *
1      20aa, >antibacterial09398... at 35.00%
>Cluster 551
0      33aa, >Antimicrobial;Gram-... at 42.42%
1      33aa, >anti-Gram+;Antimicr... at 42.42%
2      75aa, >Antimicrobial... *
3      28aa, >antibacterial07038... at 42.86%
>Cluster 552
0      75aa, >Antimicrobial... *
>Cluster 553
0      75aa, >antibacterial06469... *
1      51aa, >antibacterial06517... at 43.14%
2      71aa, >antibacterial06668... at 40.85%
3      28aa, >antibacterial06690... at 42.86%
4      46aa, >antibacterial07076... at 54.35%
5      47aa, >antibacterial07286... at 46.81%
6      47aa, >antibacterial07289... at 51.06%
7      21aa, >antibacterial07393... at 42.86%

```

```

8      51aa, >antibacterial07406... at 41.18%
9      46aa, >antibacterial07564... at 45.65%
10     46aa, >antibacterial07617... at 50.00%
11     24aa, >antibacterial08123... at 45.83%
>Cluster 554
0      75aa, >antibacterial06471... *
1      49aa, >antibacterial06472... at 81.63%
2      66aa, >antibacterial07028... at 40.91%
3      46aa, >antibacterial07279... at 43.48%
4      18aa, >antibacterial10936... at 44.44%
>Cluster 555
0      57aa, >Antibacterial... at 43.86%
1      75aa, >antibacterial06772... *
2      73aa, >antibacterial07130... at 50.68%
3      16aa, >antibacterial113039... at 43.75%
>Cluster 556
0      22aa, >Antimicrobial... at 45.45%
1      47aa, >antifungal;antimicr... *
2      72aa, >Antimicrobial... at 77.78%
3      17aa, >antimicrobial... at 41.18%
4      45aa, >antifungal;antimicr... at 64.44%
5      46aa, >antifungal;antimicr... at 69.57%
6      75aa, >antibacterial06777... *
7      74aa, >antibacterial06778... at 61.62%
8      43aa, >antibacterial07417... at 65.12%
9      72aa, >antibacterial09151... at 74.72%
10     75aa, >antibacterial09748... at 86.67%
11     74aa, >antibacterial10806... at 72.97%
>Cluster 557
0      75aa, >antibacterial110396... *
1      75aa, >antibacterial110397... at 73.33%
>Cluster 558
0      71aa, >antibacterial07477... at 47.89%
1      75aa, >antibacterial110849... *
2      75aa, >antibacterial110850... at 68.00%
>Cluster 559
0      74aa, >Antibacterial;Antif... *
1      74aa, >Antimicrobial... at 48.65%
2      24aa, >antibacterial110113... at 45.83%
3      26aa, >antibacterial110575... at 46.15%
4      74aa, >antibacterial110984... at 47.30%
5      74aa, >antibacterial111001... at 41.89%
>Cluster 560
0      37aa, >Antimicrobial... at 40.54%
1      74aa, >Antimicrobial... *
2      45aa, >Antimicrobial... at 35.00%
>Cluster 561
0      42aa, >Antimicrobial... at 42.86%
1      13aa, >antimicrobial... at 46.15%
2      74aa, >anti-Gram+;Antibact... *
3      28aa, >antibacterial07066... at 46.43%
4      21aa, >antibacterial110144... at 42.86%
>Cluster 562
0      25aa, >antibacterial;antim... at 35.00%

```

```
1      74aa, >Antimicrobial... *
>Cluster 563
0      74aa, >anti-Gram+;Antibact... *
>Cluster 564
0      28aa, >anti-Gram+... at 46.43%
1      57aa, >Antimicrobial... at 43.86%
2      74aa, >Antimicrobial... *
3      69aa, >Antimicrobial... at 44.93%
>Cluster 565
0      50aa, >antibacterial06496... at 84.00%
1      74aa, >antibacterial06497... *
>Cluster 566
0      25aa, >antimicrobial... at 35.00%
1      24aa, >Antimicrobial... at 41.67%
2      74aa, >antibacterial06505... *
3      48aa, >antibacterial06984... at 43.75%
4      46aa, >antibacterial06985... at 50.00%
5      46aa, >antibacterial07427... at 41.30%
6      46aa, >antibacterial07514... at 45.65%
7      44aa, >antibacterial07533... at 47.73%
8      21aa, >antibacterial08545... at 42.86%
>Cluster 567
0      23aa, >antibacterial... at 43.48%
1      34aa, >antibacterial;antim... at 47.06%
2      74aa, >antibacterial06518... *
3      46aa, >antibacterial07466... at 43.48%
4      74aa, >antibacterial07490... at 41.89%
5      18aa, >antibacterial07575... at 44.44%
6      28aa, >antibacterial08440... at 42.86%
7      26aa, >antibacterial09762... at 46.15%
>Cluster 568
0      50aa, >Antibacterial;Antim... at 78.00%
1      36aa, >Antimicrobial... at 41.67%
2      42aa, >Antibacterial;Antim... at 40.48%
3      62aa, >antibacterial06821... at 50.00%
4      63aa, >antibacterial06835... at 55.56%
5      73aa, >antibacterial06836... at 49.32%
6      73aa, >antibacterial06837... at 43.84%
7      74aa, >antibacterial06838... *
8      63aa, >antibacterial11006... at 55.56%
>Cluster 569
0      70aa, >antibacterial06501... at 35.00%
1      50aa, >antibacterial06577... at 52.00%
2      70aa, >antibacterial06637... at 35.00%
3      74aa, >antibacterial07405... *
4      46aa, >antibacterial07616... at 43.48%
>Cluster 570
0      74aa, >antibacterial09106... *
1      20aa, >antibacterial10624... at 35.00%
>Cluster 571
0      26aa, >antibacterial07933... at 46.15%
1      21aa, >antibacterial08047... at 42.86%
2      74aa, >antibacterial10847... *
>Cluster 572
```

```

0      74aa, >antibacterial11037... *
>Cluster 573
0      73aa, >anti-Gram+;Antibact... *
>Cluster 574
0      26aa, >antifungal;antimicr... at 46.15%
1      23aa, >anti-Gram+;antibact... at 43.48%
2      73aa, >Antimicrobial... *
3      27aa, >antibacterial;Antif... at 40.74%
>Cluster 575
0      73aa, >Antimicrobial... *
1      72aa, >antibacterial11107... at 58.33%
>Cluster 576
0      68aa, >Antimicrobial... at 42.65%
1      73aa, >Antimicrobial... *
2      59aa, >Antimicrobial... at 54.24%
>Cluster 577
0      49aa, >antibacterial06473... at 81.63%
1      73aa, >antibacterial06474... *
2      73aa, >antibacterial06475... at 83.56%
3      71aa, >antibacterial06696... at 40.85%
4      71aa, >antibacterial06700... at 40.85%
5      46aa, >antibacterial06701... at 45.65%
6      46aa, >antibacterial07078... at 47.83%
7      71aa, >antibacterial07080... at 42.25%
8      46aa, >antibacterial07081... at 47.83%
9      49aa, >antibacterial07489... at 65.31%
10     23aa, >antibacterial11673... at 47.83%
11     28aa, >antibacterial112899... at 46.43%
>Cluster 578
0      73aa, >antibacterial06516... *
1      47aa, >antibacterial06575... at 40.43%
2      69aa, >antibacterial06578... at 40.58%
3      70aa, >antibacterial07284... at 41.43%
4      70aa, >antibacterial07285... at 42.86%
>Cluster 579
0      46aa, >antibacterial;antif... at 78.26%
1      46aa, >antibacterial;Antif... at 73.91%
2      73aa, >antibacterial06782... *
3      44aa, >antibacterial09753... at 83.18%
>Cluster 580
0      50aa, >Antibacterial;Antim... at 72.00%
1      73aa, >antibacterial06884... *
>Cluster 581
0      56aa, >Antimicrobial... at 82.14%
1      73aa, >antibacterial09612... *
2      24aa, >antibacterial110731... at 41.67%
>Cluster 582
0      72aa, >Antimicrobial... *
>Cluster 583
0      50aa, >Antimicrobial... at 52.00%
1      72aa, >Antimicrobial... *
2      49aa, >Antimicrobial... at 46.94%
3      61aa, >Antimicrobial... at 73.77%
4      58aa, >Antimicrobial... at 83.10%

```

```

5      61aa, >Antimicrobial... at 86.89%
>Cluster 584
0      70aa, >Antibacterial... at 72.86%
1      72aa, >Antibacterial... *
>Cluster 585
0      38aa, >anti-Gram+... at 44.74%
1      33aa, >Antimicrobial... at 42.42%
2      71aa, >Antimicrobial... at 43.66%
3      72aa, >Antimicrobial... *
4      65aa, >Antimicrobial... at 44.62%
>Cluster 586
0      64aa, >Antimicrobial... at 56.25%
1      67aa, >Antimicrobial... at 58.21%
2      65aa, >Antimicrobial... at 35.00%
3      72aa, >Antimicrobial... *
4      72aa, >Antimicrobial... at 73.61%
>Cluster 587
0      71aa, >Antimicrobial... at 61.97%
1      72aa, >Antimicrobial... *
>Cluster 588
0      72aa, >Antimicrobial... *
1      24aa, >antibacterial08674... at 41.67%
>Cluster 589
0      44aa, >Antifungal;antimicr... at 40.91%
1      44aa, >antimicrobial... at 43.18%
2      44aa, >anti-Gram+;antibact... at 83.18%
3      44aa, >Antifungal... at 86.36%
4      44aa, >Antifungal;antimicr... *
5      44aa, >Antifungal... at 78.64%
6      46aa, >antifungal;antimicr... at 80.43%
7      42aa, >antifungal;antimicr... at 42.86%
8      41aa, >antimicrobial... at 41.46%
9      54aa, >antibacterial06870... at 72.22%
10     44aa, >antibacterial09553... at 81.82%
11     44aa, >antibacterial09554... at 86.36%
12     44aa, >antibacterial09555... at 81.82%
13     44aa, >antibacterial09556... at 84.09%
14     44aa, >antibacterial09557... at 79.55%
15     44aa, >antibacterial09558... at 75.00%
16     44aa, >antibacterial09559... at 77.27%
17     72aa, >antibacterial10805... *
18     43aa, >antibacterial11497... at 83.72%
19     44aa, >antibacterial11498... at 77.27%
>Cluster 590
0      72aa, >antibacterial10826... *
>Cluster 591
0      71aa, >anti-Gram+;Antibact... *
>Cluster 592
0      71aa, >anti-Gram+;Antibact... *
1      23aa, >antibacterial07962... at 43.48%
>Cluster 593
0      46aa, >Antibacterial;Antif... at 45.65%
1      71aa, >Antifungal... *
2      43aa, >Antibacterial;Antim... at 44.19%

```

```

3      47aa, >Antifungal... at 48.94%
4      47aa, >antibacterial07421... at 44.68%
5      15aa, >antibacterial08699... at 35.00%
>Cluster 594
0      71aa, >Antimicrobial... *
>Cluster 595
0      46aa, >antimicrobial... at 65.22%
1      42aa, >antifungal;antimicr... at 50.00%
2      42aa, >antimicrobial... at 52.38%
3      42aa, >antimicrobial... at 52.38%
4      42aa, >antimicrobial... at 50.00%
5      71aa, >Antifungal... *
6      70aa, >antibacterial06914... at 61.43%
7      27aa, >antibacterial08928... at 44.44%
8      13aa, >antibacterial09588... at 53.85%
9      14aa, >antibacterial10791... at 42.86%
>Cluster 596
0      71aa, >Antimicrobial... *
1      38aa, >antibacterial10650... at 63.16%
>Cluster 597
0      71aa, >Antimicrobial... *
1      38aa, >antibacterial08783... at 42.11%
>Cluster 598
0      71aa, >Antimicrobial... *
>Cluster 599
0      71aa, >Antimicrobial... *
1      29aa, >antibacterial;antim... at 44.83%
2      37aa, >Antimicrobial... at 48.65%
>Cluster 600
0      45aa, >Antimicrobial... at 68.10%
1      40aa, >antibacterial;antim... *
2      41aa, >anti-Gram+;antibact... at 70.48%
3      42aa, >Antimicrobial... at 70.48%
4      46aa, >Antimicrobial... at 83.48%
5      71aa, >Antimicrobial... *
6      60aa, >Antibacterial... at 76.67%
7      43aa, >Antimicrobial... at 69.77%
>Cluster 601
0      71aa, >Antimicrobial... *
>Cluster 602
0      37aa, >antibacterial;antim... at 45.95%
1      71aa, >antibacterial06515... *
>Cluster 603
0      30aa, >Antibacterial;Antif... at 35.00%
1      20aa, >antimicrobial... at 45.00%
2      71aa, >antibacterial06576... *
3      47aa, >antibacterial06581... at 61.70%
4      71aa, >antibacterial06582... at 53.52%
>Cluster 604
0      21aa, >Antibacterial;Antif... at 42.86%
1      71aa, >antibacterial06661... *
2      71aa, >antibacterial06697... at 56.34%
3      71aa, >antibacterial06698... at 50.70%
4      71aa, >antibacterial06699... at 52.11%

```



```

5      47aa, >antibacterial07291... at 44.68%
6      71aa, >antibacterial07467... at 40.85%
>Cluster 605
0      71aa, >antibacterial06695... *
1      71aa, >antibacterial07281... at 42.25%
2      13aa, >antibacterial11467... at 46.15%
>Cluster 606
0      34aa, >antimicrobial... at 44.12%
1      16aa, >Antimicrobial... at 43.75%
2      65aa, >Antimicrobial... at 35.00%
3      60aa, >Antimicrobial... at 70.00%
4      64aa, >Antimicrobial... at 40.62%
5      41aa, >Antibacterial;Antim... at 48.78%
6      36aa, >antimicrobial... at 41.67%
7      63aa, >antibacterial06829... at 50.79%
8      64aa, >antibacterial07161... at 48.44%
9      63aa, >antibacterial07162... at 61.90%
10     67aa, >antibacterial07164... at 43.28%
11     63aa, >antibacterial07166... at 58.73%
12     63aa, >antibacterial07167... at 52.38%
13     71aa, >antibacterial07168... *
14     64aa, >antibacterial07169... at 40.62%
15     38aa, >L01A000349... at 44.74%
16     25aa, >antibacterial11409... at 44.00%
>Cluster 607
0      71aa, >antibacterial07287... *
1      71aa, >antibacterial07288... at 68.87%
2      71aa, >antibacterial07290... at 56.20%
3      30aa, >antibacterial09853... at 43.33%
4      29aa, >antibacterial11384... at 41.38%
>Cluster 608
0      36aa, >Antimicrobial... at 41.67%
1      21aa, >antibacterial07368... at 52.38%
2      71aa, >antibacterial07563... *
3      16aa, >antibacterial11333... at 50.00%
>Cluster 609
0      69aa, >anti-Gram+;Antibact... at 43.48%
1      29aa, >Anti-Gram-;antibact... at 41.38%
2      69aa, >antibacterial10742... at 42.03%
3      71aa, >antibacterial110803... *
>Cluster 610
0      71aa, >antibacterial110853... *
>Cluster 611
0      23aa, >antimicrobial... at 43.48%
1      67aa, >antibacterial06747... at 73.13%
2      22aa, >antibacterial07928... at 40.91%
3      25aa, >antibacterial08071... at 44.00%
4      71aa, >antibacterial110977... *
5      28aa, >antibacterial113258... at 50.00%
>Cluster 612
0      68aa, >antibacterial110817... at 77.94%
1      70aa, >antibacterial111017... at 35.00%
2      68aa, >antibacterial111033... at 85.29%
3      71aa, >antibacterial111034... *

```

```

4      70aa, >antibacterial11035... at 75.71%
>Cluster 613
0      70aa, >Antimicrobial... *
1      32aa, >Antimicrobial... at 40.62%
>Cluster 614
0      70aa, >Antimicrobial... *
>Cluster 615
0      51aa, >Antimicrobial... at 86.27%
1      70aa, >Antimicrobial... *
2      67aa, >antibacterial07165... at 40.30%
3      43aa, >antibacterial11122... at 80.70%
>Cluster 616
0      70aa, >anti-Gram-... *
1      18aa, >antibacterial08665... at 50.00%
>Cluster 617
0      70aa, >antibacterial06538... *
1      70aa, >antibacterial06579... at 48.57%
2      46aa, >antibacterial06636... at 47.83%
3      47aa, >antibacterial07074... at 40.43%
4      70aa, >antibacterial07280... at 57.14%
5      68aa, >antibacterial07535... at 54.41%
6      70aa, >antibacterial07614... at 47.14%
7      70aa, >antibacterial07615... at 61.43%
8      70aa, >antibacterial07619... at 57.14%
9      46aa, >antibacterial07620... at 60.87%
>Cluster 618
0      70aa, >antibacterial06624... *
1      46aa, >antibacterial07030... at 69.13%
>Cluster 619
0      70aa, >antibacterial07139... *
1      70aa, >antibacterial07303... at 42.86%
2      24aa, >antibacterial08137... at 45.83%
>Cluster 620
0      64aa, >antibacterial07140... at 45.31%
1      62aa, >antibacterial07236... at 40.32%
2      70aa, >antibacterial07238... *
3      70aa, >antibacterial07304... at 47.14%
4      55aa, >antibacterial07469... at 43.64%
5      56aa, >antibacterial07470... at 42.86%
6      32aa, >antibacterial08889... at 46.88%
>Cluster 621
0      70aa, >antibacterial07426... *
1      70aa, >antibacterial07515... at 44.29%
>Cluster 622
0      18aa, >antibacterial08662... at 44.44%
1      70aa, >antibacterial10891... *
>Cluster 623
0      69aa, >anti-Gram+;Antibact... *
>Cluster 624
0      69aa, >Antimicrobial... *
>Cluster 625
0      69aa, >Antimicrobial... *
>Cluster 626
0      45aa, >Antimicrobial... at 73.33%

```

```

1      48aa, >Antimicrobial... at 72.92%
2      48aa, >Antimicrobial... at 58.33%
3      43aa, >Antimicrobial... at 55.81%
4      69aa, >Antimicrobial... *
5      69aa, >antibacterial07159... at 62.32%
6      52aa, >antibacterial11117... at 59.62%
>Cluster 627
0      42aa, >Antimicrobial... at 42.86%
1      69aa, >Antimicrobial... *
2      67aa, >antibacterial07123... at 40.30%
3      35aa, >antibacterial07438... at 42.86%
>Cluster 628
0      40aa, >antimicrobial... at 35.00%
1      69aa, >Antimicrobial... *
2      69aa, >antibacterial11070... at 69.57%
3      20aa, >antibacterial13288... at 35.00%
>Cluster 629
0      60aa, >Antimicrobial... at 46.67%
1      69aa, >Antimicrobial... *
2      26aa, >antibacterial10253... at 42.31%
>Cluster 630
0      56aa, >antibacterial06806... at 42.86%
1      69aa, >antibacterial06913... *
2      20aa, >antibacterial12019... at 35.00%
>Cluster 631
0      24aa, >antimicrobial... at 41.67%
1      69aa, >antibacterial06920... *
2      30aa, >antibacterial07990... at 35.00%
>Cluster 632
0      36aa, >anti-Gram+;antibact... at 55.56%
1      41aa, >antibacterial;antim... at 48.78%
2      44aa, >Antimicrobial... at 43.18%
3      49aa, >Antimicrobial... at 42.86%
4      64aa, >Antimicrobial... at 42.19%
5      64aa, >Antimicrobial... at 45.31%
6      64aa, >Antimicrobial... at 42.19%
7      64aa, >Antimicrobial... at 42.19%
8      64aa, >Antimicrobial... at 45.31%
9      64aa, >Antimicrobial... at 42.19%
10     44aa, >antimicrobial... at 40.91%
11     43aa, >Antimicrobial... at 58.14%
12     34aa, >antibacterial06980... at 44.12%
13     64aa, >antibacterial07176... at 45.31%
14     64aa, >antibacterial07177... at 43.75%
15     64aa, >antibacterial07178... at 42.19%
16     64aa, >antibacterial07179... at 40.62%
17     69aa, >antibacterial07189... *
18     68aa, >antibacterial07215... at 54.41%
19     68aa, >antibacterial07216... at 60.29%
20     68aa, >antibacterial07217... at 61.76%
21     44aa, >antibacterial09765... at 40.91%
22     60aa, >antibacterial10823... at 45.00%
23     62aa, >antibacterial11074... at 41.94%
>Cluster 633

```

```

0      69aa, >antibacterial07536... *
1      24aa, >antibacterial10412... at 41.67%
>Cluster 634
0      19aa, >antibacterial08663... at 42.11%
1      69aa, >antibacterial11096... *
>Cluster 635
0      68aa, >anti-Gram+;anti-HIV... *
1      18aa, >antibacterial08891... at 44.44%
>Cluster 636
0      21aa, >antimicrobial... at 42.86%
1      68aa, >Antifungal... *
2      36aa, >antimicrobial... at 41.67%
3      31aa, >antibacterial07574... at 51.61%
4      25aa, >antibacterial08070... at 35.00%
>Cluster 637
0      68aa, >Antimicrobial... *
1      61aa, >Antimicrobial... at 44.26%
>Cluster 638
0      23aa, >anti-Gram+;Antibact... at 43.48%
1      68aa, >Antimicrobial... *
2      26aa, >antibacterial13234... at 42.31%
>Cluster 639
0      68aa, >Antimicrobial... *
1      21aa, >antimicrobial;antiv... at 42.86%
>Cluster 640
0      37aa, >Antimicrobial... at 40.54%
1      40aa, >Antimicrobial... at 42.50%
2      67aa, >Antibacterial;Antif... at 50.75%
3      68aa, >Antimicrobial... *
4      47aa, >Antibacterial;Gram-... at 53.19%
5      40aa, >antibacterial07591... at 35.00%
6      42aa, >antibacterial07602... at 40.48%
>Cluster 641
0      68aa, >Antimicrobial... *
1      68aa, >Antimicrobial... at 52.94%
>Cluster 642
0      64aa, >Antimicrobial... at 42.19%
1      68aa, >Antimicrobial... *
2      19aa, >antibacterial08540... at 42.11%
>Cluster 643
0      35aa, >Antibacterial;Antif... at 48.57%
1      45aa, >antibacterial;Antif... at 73.33%
2      68aa, >Antifungal... *
>Cluster 644
0      50aa, >anti-Gram+;antibact... at 35.00%
1      68aa, >antibacterial10834... *
2      66aa, >antibacterial10863... at 78.79%
>Cluster 645
0      67aa, >Antimicrobial... *
>Cluster 646
0      67aa, >Antibacterial... *
1      34aa, >antibacterial07461... at 41.18%
>Cluster 647
0      21aa, >antimicrobial... at 47.62%

```

```
1      67aa, >Antimicrobial... *
>Cluster 648
0      67aa, >Antimicrobial... *
1      26aa, >antibacterial11315... at 42.31%
>Cluster 649
0      67aa, >Antimicrobial... *
>Cluster 650
0      30aa, >Antibacterial;Antif... at 35.00%
1      39aa, >antibacterial;Antif... at 69.23%
2      39aa, >Anti-Gram-... at 43.59%
3      64aa, >Antimicrobial... at 50.00%
4      62aa, >Antimicrobial... at 46.77%
5      63aa, >Antimicrobial... at 58.73%
6      63aa, >Antimicrobial... at 52.38%
7      62aa, >Antimicrobial... at 48.39%
8      63aa, >Antimicrobial... at 52.38%
9      62aa, >Antimicrobial... at 48.39%
10     67aa, >Antimicrobial... *
11     64aa, >Antimicrobial... at 51.56%
12     65aa, >Antimicrobial... at 35.00%
13     62aa, >Antimicrobial... at 46.77%
14     64aa, >Antimicrobial... at 53.12%
15     62aa, >Antimicrobial... at 45.16%
16     62aa, >Antimicrobial... at 59.68%
17     63aa, >Antimicrobial... at 53.97%
18     63aa, >Antimicrobial... at 52.38%
19     62aa, >Antimicrobial... at 67.74%
20     63aa, >Antimicrobial... at 46.03%
21     65aa, >Antimicrobial... at 41.54%
22     66aa, >Antimicrobial... at 42.42%
23     41aa, >antibacterial;antim... at 53.66%
24     40aa, >Antibacterial... at 50.00%
25     66aa, >antibacterial06855... at 46.97%
26     63aa, >antibacterial06916... at 42.86%
27     62aa, >antibacterial06918... at 58.06%
28     65aa, >antibacterial06925... at 47.69%
29     62aa, >antibacterial06926... at 43.55%
30     63aa, >antibacterial06927... at 47.62%
31     63aa, >antibacterial06928... at 49.21%
32     61aa, >antibacterial06929... at 63.93%
33     62aa, >antibacterial06930... at 58.06%
34     63aa, >antibacterial07117... at 50.79%
35     63aa, >antibacterial07118... at 47.62%
36     59aa, >antibacterial07121... at 49.15%
37     63aa, >antibacterial07122... at 42.86%
38     62aa, >antibacterial07131... at 51.61%
39     32aa, >antibacterial07558... at 43.75%
40     38aa, >antibacterial07744... at 55.26%
41     39aa, >antibacterial07757... at 61.54%
42     37aa, >antibacterial08410... at 43.24%
43     38aa, >antibacterial08829... at 47.37%
44     39aa, >antibacterial10679... at 61.54%
45     58aa, >antibacterial10942... at 44.83%
46     65aa, >antibacterial11012... at 50.77%
```

```

47    62aa, >antibacterial11050... at 46.77%
48    63aa, >antibacterial11051... at 47.62%
49    67aa, >antibacterial11052... at 49.25%
50    59aa, >antibacterial11053... at 52.54%
51    65aa, >antibacterial11061... at 41.54%
52    63aa, >antibacterial11062... at 49.21%
53    23aa, >antibacterial13345... at 73.91%
>Cluster 651
0      65aa, >Antimicrobial... at 44.62%
1      67aa, >Antimicrobial... *
>Cluster 652
0      21aa, >antimicrobial... at 42.86%
1      44aa, >antibacterial;antim... at 43.18%
2      62aa, >Antimicrobial... at 43.55%
3      65aa, >Antimicrobial... at 50.77%
4      67aa, >Antimicrobial... *
5      30aa, >antibacterial110619... at 43.33%
>Cluster 653
0      64aa, >Antimicrobial... at 46.88%
1      67aa, >Antimicrobial... *
2      66aa, >Antimicrobial... at 43.94%
>Cluster 654
0      38aa, >Antibacterial... at 78.95%
1      42aa, >anti-Gram+;antibact... at 83.33%
2      28aa, >Antimicrobial... at 42.86%
3      28aa, >anti-Gram-;Antibact... at 42.86%
4      36aa, >antibacterial;antim... at 44.44%
5      63aa, >Antimicrobial... at 84.13%
6      67aa, >Antimicrobial... *
7      67aa, >Antibacterial... at 85.07%
8      64aa, >Antimicrobial... at 43.75%
9      64aa, >Antimicrobial... at 43.75%
10     64aa, >Antimicrobial... at 40.62%
11     35aa, >Antimicrobial... at 35.00%
12     64aa, >antibacterial107170... at 43.75%
13     42aa, >antibacterial109658... at 80.95%
14     35aa, >antibacterial110598... at 48.57%
>Cluster 655
0      24aa, >antimicrobial... at 41.67%
1      24aa, >antimicrobial... at 41.67%
2      24aa, >Antimicrobial... at 41.67%
3      24aa, >antimicrobial... at 45.83%
4      67aa, >Antimicrobial... *
5      24aa, >anti-Gram+;antifung... at 41.67%
6      24aa, >antimicrobial... at 41.67%
>Cluster 656
0      46aa, >Antimicrobial... at 69.57%
1      48aa, >Antimicrobial... at 81.25%
2      46aa, >Antibacterial... at 69.57%
3      50aa, >Antimicrobial... at 70.00%
4      46aa, >Antimicrobial... at 52.17%
5      46aa, >Antibacterial;Antim... at 76.09%
6      52aa, >Antimicrobial... at 76.92%
7      54aa, >Antimicrobial... at 61.11%

```

```

8      48aa, >Antimicrobial... at 70.83%
9      48aa, >Antimicrobial... at 77.08%
10     48aa, >Antimicrobial... at 66.67%
11     48aa, >Antimicrobial... at 70.83%
12     47aa, >Antimicrobial... at 82.98%
13     48aa, >Antimicrobial... at 72.92%
14     62aa, >antibacterial06815... at 40.32%
15     67aa, >antibacterial06833... *
16     62aa, >antibacterial06834... at 51.61%
17     16aa, >antibacterial07011... at 43.75%
>Cluster 657
0      27aa, >antimicrobial... at 40.74%
1      33aa, >antibacterial06446... at 45.45%
2      67aa, >antibacterial06851... *
3      42aa, >antibacterial07624... at 42.86%
>Cluster 658
0      23aa, >Anti-Gram-;antibact... at 43.48%
1      67aa, >antibacterial06896... *
2      60aa, >antibacterial06897... at 66.67%
3      62aa, >antibacterial06898... at 51.61%
4      60aa, >antibacterial06899... at 68.33%
5      57aa, >antibacterial06900... at 68.42%
>Cluster 659
0      32aa, >Antimicrobial... at 40.62%
1      21aa, >antibacterial08454... at 42.86%
2      67aa, >antibacterial10999... *
>Cluster 660
0      29aa, >antimicrobial... at 41.38%
1      29aa, >antibacterial;antim... at 41.38%
2      24aa, >antibacterial;Antif... at 45.83%
3      60aa, >antibacterial06921... at 51.67%
4      67aa, >antibacterial11042... *
5      60aa, >antibacterial11043... at 45.00%
6      62aa, >antibacterial11047... at 45.16%
7      60aa, >antibacterial11049... at 50.00%
>Cluster 661
0      66aa, >anti-Gram+;Antimicr... *
1      64aa, >antibacterial08089... at 78.12%
2      66aa, >antibacterial08090... at 77.88%
3      66aa, >antibacterial10916... at 86.36%
>Cluster 662
0      66aa, >Antibacterial... *
>Cluster 663
0      65aa, >Antimicrobial... at 56.92%
1      66aa, >Antimicrobial... *
2      60aa, >Antimicrobial... at 48.33%
>Cluster 664
0      60aa, >Antimicrobial... at 41.67%
1      61aa, >Antimicrobial... at 50.82%
2      61aa, >Antimicrobial... at 44.26%
3      66aa, >Antimicrobial... *
4      61aa, >Antimicrobial... at 44.26%
>Cluster 665
0      37aa, >antibacterial... at 40.54%

```

```

1      24aa, >antimicrobial... at 45.83%
2      35aa, >anti-Gram+;antifung... at 60.00%
3      51aa, >Antimicrobial... at 52.94%
4      36aa, >antibacterial... at 66.67%
5      26aa, >Antimicrobial... at 46.15%
6      35aa, >antibacterial... at 48.57%
7      63aa, >Antimicrobial... at 47.62%
8      66aa, >Antimicrobial... *
9      24aa, >antibacterial07036... at 41.67%
10     59aa, >antibacterial07119... at 42.37%
11     36aa, >antibacterial08273... at 41.67%
12     31aa, >antibacterial10309... at 51.61%
13     34aa, >antibacterial10948... at 44.12%
14     40aa, >antibacterial11103... at 35.00%
>Cluster 666
0      66aa, >Antimicrobial... *
>Cluster 667
0      66aa, >Antimicrobial... *
>Cluster 668
0      34aa, >anti-Gram+;Antibact... at 47.06%
1      32aa, >Antimicrobial... at 40.62%
2      65aa, >antibacterial06736... at 58.46%
3      66aa, >antibacterial06737... *
4      61aa, >antibacterial07073... at 62.30%
>Cluster 669
0      29aa, >antimicrobial... at 48.28%
1      29aa, >antimicrobial... at 41.38%
2      37aa, >anti-Gram+;Antimicr... at 40.54%
3      66aa, >antibacterial06822... *
4      26aa, >antibacterial10388... at 46.15%
5      61aa, >antibacterial11003... at 45.90%
6      35aa, >antibacterial11565... at 35.00%
7      26aa, >antibacterial112440... at 42.31%
>Cluster 670
0      42aa, >antibacterial;antim... at 45.24%
1      66aa, >antibacterial06831... *
2      33aa, >antibacterial112503... at 42.42%
>Cluster 671
0      20aa, >Antimicrobial... at 35.00%
1      66aa, >antibacterial06886... *
>Cluster 672
0      43aa, >anti-Gram+;Antibact... at 58.14%
1      39aa, >Antimicrobial... at 64.10%
2      38aa, >anti-Gram+;Antibact... at 47.37%
3      38aa, >anti-Gram+;Antibact... at 42.11%
4      64aa, >Antifungal... at 40.62%
5      66aa, >antibacterial07124... *
6      30aa, >antibacterial08781... at 35.00%
>Cluster 673
0      64aa, >Antibacterial... at 65.62%
1      36aa, >Antimicrobial... at 44.44%
2      64aa, >antibacterial08087... at 56.25%
3      66aa, >antibacterial08088... *
>Cluster 674

```



```

0    45aa, >antibacterial09858... at 71.11%
1    45aa, >antibacterial09859... at 73.33%
2    52aa, >antibacterial09860... at 100.00%
3    66aa, >antibacterial09861... *
4    31aa, >antibacterial09863... at 61.29%
5    27aa, >antibacterial09894... at 62.96%
6    41aa, >antibacterial10912... at 70.73%
7    53aa, >antibacterial10940... at 56.60%
8    62aa, >antibacterial10941... at 74.19%
9    51aa, >antibacterial11099... at 72.55%
10   37aa, >antibacterial11102... at 40.54%
11   45aa, >antibacterial11397... at 57.78%
12   28aa, >antibacterial12663... at 60.71%
13   34aa, >antibacterial12930... *
14   37aa, >antibacterial13021... at 72.97%
15   37aa, >antibacterial13022... at 72.97%
16   48aa, >antibacterial13023... at 66.67%
17   46aa, >antibacterial13166... at 80.43%
18   28aa, >antibacterial13313... at 42.86%
>Cluster 675
0    65aa, >Antibacterial... *
1    37aa, >Antifungal;antimicr... at 43.24%
>Cluster 676
0    29aa, >antibacterial;antim... at 41.38%
1    65aa, >Antimicrobial... *
2    35aa, >Antibacterial... at 35.00%
3    26aa, >antibacterial09796... at 50.00%
4    26aa, >antibacterial09800... at 50.00%
5    14aa, >antibacterial11832... at 50.00%
>Cluster 677
0    44aa, >Antimicrobial... at 75.00%
1    42aa, >Antimicrobial... at 64.29%
2    44aa, >Antibacterial... at 80.91%
3    65aa, >Antimicrobial... *
4    36aa, >Antimicrobial... at 44.44%
5    36aa, >antibacterial07292... at 41.67%
>Cluster 678
0    65aa, >Antimicrobial... *
>Cluster 679
0    65aa, >Antimicrobial... *
>Cluster 680
0    54aa, >Antimicrobial... at 61.11%
1    65aa, >Antimicrobial... *
2    64aa, >Antimicrobial... at 69.06%
3    51aa, >Antimicrobial... at 50.98%
>Cluster 681
0    65aa, >anti-Gram-... *
1    52aa, >Antimicrobial... at 50.00%
>Cluster 682
0    38aa, >anti-Gram+;Antibact... at 57.89%
1    38aa, >anti-Gram+;Antibact... at 73.68%
2    64aa, >Antimicrobial... at 53.12%
3    65aa, >Antimicrobial... *
4    20aa, >antibacterial08048... at 35.00%

```

```

5      23aa, >antibacterial10267... at 47.83%
6      26aa, >antibacterial12169... at 46.15%
>Cluster 683
0      47aa, >Antimicrobial... at 40.43%
1      63aa, >Antimicrobial... at 87.30%
2      65aa, >Antimicrobial... *
>Cluster 684
0      50aa, >Antimicrobial... at 64.00%
1      48aa, >Antimicrobial... at 64.58%
2      50aa, >Antimicrobial... at 66.00%
3      50aa, >Antimicrobial... at 72.00%
4      50aa, >Antimicrobial... at 66.00%
5      46aa, >Antimicrobial... *
6      50aa, >Antimicrobial... at 62.00%
7      50aa, >Antimicrobial... at 62.00%
8      53aa, >Antimicrobial... at 75.47%
9      46aa, >Antimicrobial... at 71.74%
10     65aa, >antibacterial07188... *
11     45aa, >antibacterial08012... at 77.78%
12     47aa, >antibacterial08013... at 80.00%
13     43aa, >antibacterial08014... at 77.78%
14     41aa, >antibacterial08015... at 73.33%
15     46aa, >antibacterial08016... at 86.67%
16     45aa, >antibacterial08017... at 66.00%
>Cluster 685
0      14aa, >antimicrobial... at 42.86%
1      45aa, >antibacterial;Antif... at 55.56%
2      38aa, >Antimicrobial... at 68.42%
3      40aa, >antibacterial07528... at 60.00%
4      48aa, >antibacterial10572... at 50.00%
5      65aa, >antibacterial10811... *
>Cluster 686
0      61aa, >anti-Gram+;Antibact... at 47.54%
1      64aa, >anti-Gram+;Antibact... *
>Cluster 687
0      24aa, >antimicrobial... at 45.83%
1      64aa, >Antimicrobial... *
2      20aa, >antibacterial11952... at 35.00%
>Cluster 688
0      64aa, >antibacterial... *
1      20aa, >antibacterial13048... at 35.00%
2      35aa, >antibacterial13162... at 35.00%
>Cluster 689
0      45aa, >Antimicrobial... at 83.33%
1      64aa, >Antimicrobial... *
2      63aa, >Antimicrobial... at 76.19%
>Cluster 690
0      64aa, >Antimicrobial... *
1      31aa, >antibacterial10609... at 41.94%
>Cluster 691
0      39aa, >Antimicrobial... at 41.03%
1      64aa, >Antimicrobial... *
>Cluster 692
0      64aa, >Antimicrobial... *

```

```

1      64aa, >Antimicrobial... at 67.19%
>Cluster 693
0      44aa, >Antimicrobial... at 45.45%
1      40aa, >Antibacterial;Antif... at 45.00%
2      30aa, >anti-Gram+;antifung... at 50.00%
3      63aa, >Antimicrobial... at 49.21%
4      64aa, >Antimicrobial... *
5      62aa, >Antimicrobial... at 46.77%
6      35aa, >antibacterial;antim... at 51.43%
7      36aa, >Antimicrobial... at 58.33%
8      36aa, >Antimicrobial... at 58.33%
9      36aa, >Antimicrobial... at 52.78%
10     36aa, >Antimicrobial... at 55.56%
11     64aa, >antibacterial07218... at 45.31%
12     38aa, >antibacterial09805... at 52.63%
>Cluster 694
0      64aa, >Antimicrobial... *
>Cluster 695
0      64aa, >Antimicrobial... *
1      64aa, >Antimicrobial... at 75.94%
>Cluster 696
0      64aa, >Gram-... *
1      20aa, >antibacterial12708... at 45.00%
2      25aa, >antibacterial13157... at 35.00%
>Cluster 697
0      63aa, >antibacterial06735... at 41.27%
1      64aa, >L01A003805... *
2      16aa, >antibacterial12967... at 43.75%
>Cluster 698
0      64aa, >antibacterial09844... *
>Cluster 699
0      60aa, >anti-Gram-... at 46.67%
1      47aa, >anti-Gram-;antimicr... at 46.81%
2      39aa, >anti-Gram-;antimicr... at 76.92%
3      63aa, >anti-Gram+;Gram-... *
4      18aa, >antibacterial10230... at 44.44%
5      37aa, >antibacterial13336... at 40.54%
>Cluster 700
0      63aa, >Anti-Gram-... *
>Cluster 701
0      35aa, >antifungal;antimicr... at 35.00%
1      63aa, >Antifungal;Antimicr... *
>Cluster 702
0      63aa, >Antimicrobial... *
1      58aa, >Antimicrobial... at 67.93%
2      58aa, >Antimicrobial... at 65.52%
3      58aa, >Antimicrobial... at 62.07%
4      39aa, >antibacterial11281... at 41.03%
>Cluster 703
0      63aa, >anti-Gram+;antifung... *
>Cluster 704
0      63aa, >Antimicrobial... *
1      34aa, >antibacterial08262... at 44.12%
>Cluster 705

```

```
0      21aa, >antimicrobial... at 42.86%
1      63aa, >Antimicrobial... *
2      63aa, >Antimicrobial... at 71.43%
>Cluster 706
0      63aa, >Antimicrobial... *
1      31aa, >antibacterial07853... at 48.39%
2      25aa, >antibacterial13005... at 44.00%
>Cluster 707
0      63aa, >Antimicrobial... *
>Cluster 708
0      63aa, >Antimicrobial... *
>Cluster 709
0      63aa, >Antimicrobial... *
>Cluster 710
0      63aa, >Antimicrobial... *
1      33aa, >antibacterial11253... at 42.42%
>Cluster 711
0      24aa, >Antibacterial... at 41.67%
1      40aa, >antimicrobial... at 67.50%
2      39aa, >antimicrobial... at 46.15%
3      39aa, >antimicrobial... at 46.15%
4      43aa, >antimicrobial... at 48.84%
5      40aa, >antimicrobial... at 62.50%
6      63aa, >Antibacterial... *
7      40aa, >antimicrobial... at 47.50%
8      23aa, >antibacterial11509... at 43.48%
>Cluster 712
0      63aa, >Antimicrobial... *
>Cluster 713
0      63aa, >Antibacterial;Antif... *
>Cluster 714
0      63aa, >antibacterial06528... *
1      28aa, >antibacterial06629... at 75.00%
>Cluster 715
0      44aa, >Antimicrobial... at 84.09%
1      44aa, >Antibacterial;Antim... at 84.09%
2      45aa, >Antimicrobial... at 41.36%
3      45aa, >Antimicrobial... at 63.64%
4      45aa, >Antimicrobial... at 41.36%
5      45aa, >Antimicrobial... at 68.89%
6      47aa, >Antimicrobial... at 57.45%
7      49aa, >Antimicrobial... at 53.06%
8      44aa, >Antibacterial;Antim... at 47.73%
9      63aa, >antibacterial06828... *
10     62aa, >antibacterial07160... at 43.55%
11     43aa, >antibacterial11111... *
>Cluster 716
0      34aa, >Antifungal;antimicr... at 44.12%
1      63aa, >antibacterial07604... *
2      63aa, >antibacterial07605... at 82.54%
>Cluster 717
0      63aa, >antibacterial11005... *
>Cluster 718
0      62aa, >Antimicrobial... *
```

```

>Cluster 719
0      62aa, >Antimicrobial... *
>Cluster 720
0      62aa, >Antimicrobial... *
>Cluster 721
0      62aa, >Antimicrobial... *
1      56aa, >Antimicrobial... at 41.07%
2      59aa, >Antimicrobial... at 72.88%
3      25aa, >antibacterial06531... at 35.00%
4      19aa, >antibacterial08412... at 42.11%
>Cluster 722
0      62aa, >Antimicrobial... *
1      32aa, >antibacterial10651... at 78.12%
>Cluster 723
0      62aa, >anti-Gram+;Antibact... *
>Cluster 724
0      62aa, >Antibacterial... *
>Cluster 725
0      59aa, >Antibacterial;Gram-... at 62.71%
1      62aa, >antibacterial06458... *
2      60aa, >antibacterial06672... at 56.67%
>Cluster 726
0      62aa, >antibacterial06911... *
>Cluster 727
0      42aa, >anti-Gram+;Antibact... at 40.48%
1      42aa, >Antibacterial... at 59.52%
2      42aa, >Antibacterial;Antim... at 59.52%
3      62aa, >antibacterial07180... *
4      62aa, >antibacterial07181... at 79.03%
>Cluster 728
0      55aa, >anti-Gram-... at 50.91%
1      39aa, >anti-Gram+;antibact... at 46.15%
2      39aa, >anti-Gram+;antibact... at 46.15%
3      14aa, >antimicrobial... at 42.86%
4      31aa, >Antifungal;Gram-... at 45.16%
5      30aa, >Antibacterial;Antif... at 35.00%
6      62aa, >antibacterial07916... *
7      35aa, >antibacterial08493... at 35.00%
>Cluster 729
0      61aa, >Antimicrobial... *
>Cluster 730
0      59aa, >Antimicrobial... at 50.85%
1      60aa, >Antimicrobial... at 83.33%
2      61aa, >Antimicrobial... *
3      31aa, >antibacterial06569... at 41.94%
4      13aa, >antibacterial08081... at 53.85%
5      35aa, >antibacterial09293... at 80.00%
6      35aa, >antibacterial09295... at 65.71%
7      26aa, >antibacterial112418... at 46.15%
8      18aa, >antibacterial113036... at 44.44%
>Cluster 731
0      61aa, >Antimicrobial... *
1      18aa, >antibacterial110188... at 44.44%
>Cluster 732

```

```

0      61aa, >Antimicrobial... *
1      27aa, >anti-Gram+... at 40.74%
2      29aa, >antibacterial08981... at 62.07%
>Cluster 733
0      19aa, >Antibacterial... at 42.11%
1      19aa, >Antibacterial... at 42.11%
2      60aa, >antibacterial06468... at 70.00%
3      61aa, >antibacterial06727... *
4      53aa, >antibacterial06728... at 43.40%
5      60aa, >antibacterial06729... at 58.33%
6      61aa, >antibacterial06730... at 60.66%
7      61aa, >antibacterial06731... at 62.30%
8      61aa, >antibacterial06732... at 62.30%
9      50aa, >antibacterial06803... at 35.00%
10     60aa, >antibacterial06932... at 60.00%
11     61aa, >antibacterial07095... at 62.30%
>Cluster 734
0      61aa, >antibacterial08743... *
1      20aa, >antibacterial112162... at 35.00%
>Cluster 735
0      33aa, >antimicrobial... at 45.45%
1      26aa, >antibacterial08292... at 42.31%
2      61aa, >antibacterial110890... *
>Cluster 736
0      41aa, >Antibacterial;Antim... at 41.46%
1      48aa, >Antimicrobial... at 52.08%
2      32aa, >Antimicrobial... at 43.75%
3      22aa, >antibacterial110249... at 45.45%
4      61aa, >antibacterial111101... *
>Cluster 737
0      60aa, >anti-Gram+;Antimicr... *
>Cluster 738
0      60aa, >anti-Gram+... *
>Cluster 739
0      60aa, >anti-Gram+;Antibact... *
1      27aa, >antibacterial111976... at 40.74%
>Cluster 740
0      60aa, >Antimicrobial... *
1      58aa, >Antimicrobial... at 60.34%
2      60aa, >Antimicrobial... at 60.00%
3      60aa, >Antimicrobial... at 81.67%
>Cluster 741
0      60aa, >Antimicrobial... *
1      60aa, >Antimicrobial... at 80.00%
2      60aa, >Antimicrobial... at 81.67%
>Cluster 742
0      60aa, >Antimicrobial... *
1      24aa, >antimicrobial... at 41.67%
>Cluster 743
0      58aa, >Antimicrobial... at 44.83%
1      60aa, >Antimicrobial... *
2      59aa, >Antimicrobial... at 45.76%
3      59aa, >Antimicrobial... at 44.07%
4      60aa, >Antimicrobial... at 41.67%

```

```

5      59aa, >antibacterial06917... at 44.07%
6      59aa, >antibacterial07115... at 42.37%
7      59aa, >antibacterial07120... at 44.07%
>Cluster 744
0      59aa, >Antimicrobial... at 50.85%
1      60aa, >Antimicrobial... *
2      30aa, >antibacterial08980... at 80.00%
>Cluster 745
0      56aa, >Antimicrobial... at 41.07%
1      56aa, >Antimicrobial... at 58.93%
2      60aa, >Antimicrobial... *
>Cluster 746
0      60aa, >anti-Gram+;Gram-... *
>Cluster 747
0      60aa, >Antifungal... *
1      47aa, >antibacterial07517... at 51.06%
>Cluster 748
0      60aa, >antibacterial07237... *
1      24aa, >antibacterial08513... at 45.83%
2      18aa, >antibacterial13099... at 50.00%
>Cluster 749
0      58aa, >antifungal... at 83.10%
1      41aa, >antibacterial07264... at 41.46%
2      60aa, >antibacterial07386... *
>Cluster 750
0      60aa, >antibacterial08263... *
>Cluster 751
0      37aa, >Antimicrobial... at 43.24%
1      46aa, >antifungal;antimicr... at 43.48%
2      60aa, >antibacterial08562... *
3      57aa, >antibacterial10346... at 73.68%
>Cluster 752
0      60aa, >antibacterial09875... *
>Cluster 753
0      60aa, >antibacterial10914... *
>Cluster 754
0      59aa, >Antimicrobial... *
>Cluster 755
0      21aa, >antibacterial;antim... at 42.86%
1      37aa, >antimicrobial... at 51.35%
2      51aa, >Antimicrobial... at 58.82%
3      49aa, >antimicrobial... at 65.31%
4      30aa, >anti-Gram+;Antibact... at 35.00%
5      34aa, >Antibacterial;Antif... at 41.18%
6      59aa, >Antimicrobial... *
7      21aa, >antimicrobial... at 52.38%
8      34aa, >antibacterial08001... at 44.12%
9      19aa, >antibacterial08582... at 42.11%
10     20aa, >antibacterial12516... at 45.00%
>Cluster 756
0      18aa, >anti-Gram+;antibact... at 44.44%
1      25aa, >antimicrobial... at 35.00%
2      24aa, >Antibacterial;Antif... at 41.67%
3      59aa, >Antimicrobial... *

```

```

4      30aa, >antibacterial06982... at 53.33%
5      23aa, >antibacterial09309... at 43.48%
6      59aa, >antibacterial11045... at 57.63%
7      58aa, >antibacterial11048... at 50.00%
8      23aa, >antibacterial13148... at 43.48%
>Cluster 757
0      59aa, >Antimicrobial... *
>Cluster 758
0      43aa, >Antimicrobial... at 83.72%
1      47aa, >Antimicrobial... at 74.47%
2      54aa, >Antimicrobial... at 70.37%
3      46aa, >Antimicrobial... at 80.43%
4      50aa, >Antimicrobial... at 80.00%
5      49aa, >Antimicrobial... at 77.55%
6      49aa, >Antimicrobial... at 81.63%
7      46aa, >Antimicrobial... *
8      47aa, >Antimicrobial... at 85.11%
9      49aa, >Antimicrobial... at 81.63%
10     59aa, >Antimicrobial... *
11     47aa, >Antimicrobial... at 78.72%
12     48aa, >Antimicrobial... at 62.50%
13     50aa, >Antimicrobial... at 60.00%
14     40aa, >Antimicrobial... at 50.00%
15     45aa, >Antimicrobial... at 35.00%
16     13aa, >antibacterial12155... at 61.54%
>Cluster 759
0      51aa, >Antimicrobial... at 60.78%
1      46aa, >Antimicrobial... at 65.22%
2      35aa, >antimicrobial... at 68.57%
3      48aa, >Antimicrobial... at 56.25%
4      57aa, >Antimicrobial... at 68.42%
5      51aa, >Antimicrobial... at 54.90%
6      48aa, >Antibacterial;Antim... at 62.50%
7      47aa, >Antibacterial... at 59.57%
8      58aa, >Antimicrobial... at 60.34%
9      56aa, >Antimicrobial... at 75.00%
10     59aa, >Antimicrobial... *
11     57aa, >Antimicrobial... at 70.18%
>Cluster 760
0      32aa, >antibacterial07138... at 40.62%
1      33aa, >antibacterial07549... at 42.42%
2      59aa, >antibacterial07879... *
>Cluster 761
0      28aa, >Gram-... at 42.86%
1      59aa, >antibacterial08366... *
2      58aa, >antibacterial10801... at 41.38%
3      33aa, >antibacterial11936... at 42.42%
>Cluster 762
0      30aa, >anti-Gram+;Antibact... at 35.00%
1      18aa, >antimicrobial... at 44.44%
2      18aa, >antibacterial06662... at 55.56%
3      59aa, >antibacterial09880... *
4      29aa, >antibacterial09883... at 83.10%
5      50aa, >antibacterial09886... at 64.00%

```



```

>Cluster 763
0      58aa, >Antibacterial... *
>Cluster 764
0      33aa, >antimicrobial... at 42.42%
1      58aa, >Antimicrobial... *
2      58aa, >Antimicrobial... at 83.10%
3      46aa, >Antimicrobial... at 50.00%
4      55aa, >Antimicrobial... at 35.00%
>Cluster 765
0      58aa, >Antimicrobial... *
1      23aa, >Antibacterial... at 52.17%
>Cluster 766
0      58aa, >Antimicrobial... *
1      52aa, >Antimicrobial... at 40.38%
2      20aa, >antibacterial13093... at 35.00%
>Cluster 767
0      48aa, >Antimicrobial... at 43.75%
1      58aa, >Antimicrobial... *
>Cluster 768
0      58aa, >Antimicrobial... *
>Cluster 769
0      58aa, >Antibacterial... *
>Cluster 770
0      57aa, >Antibacterial... *
>Cluster 771
0      57aa, >Antimicrobial... *
1      22aa, >anti-Gram+;antibact... at 40.91%
>Cluster 772
0      57aa, >Antibacterial;Antif... *
1      36aa, >antibacterial;antim... at 41.67%
>Cluster 773
0      18aa, >Antifungal;antimicr... at 44.44%
1      57aa, >Antimicrobial... *
>Cluster 774
0      56aa, >Antimicrobial... at 51.79%
1      53aa, >Antimicrobial... at 47.17%
2      57aa, >Antimicrobial... *
3      55aa, >Antimicrobial... at 50.91%
4      51aa, >Antimicrobial... at 64.71%
5      51aa, >Antimicrobial... at 58.82%
6      48aa, >Antimicrobial... at 50.00%
7      47aa, >Antimicrobial... at 46.81%
8      51aa, >Antimicrobial... at 45.10%
9      27aa, >antibacterial07882... at 74.07%
10     28aa, >antibacterial11181... at 42.86%
>Cluster 775
0      49aa, >Antimicrobial... at 65.31%
1      57aa, >Antimicrobial... *
2      57aa, >Antimicrobial... at 49.12%
>Cluster 776
0      51aa, >Antimicrobial... at 84.31%
1      50aa, >Antimicrobial... at 78.00%
2      51aa, >Antimicrobial... at 84.31%
3      57aa, >Antimicrobial... *

```

```

4      51aa, >Antimicrobial... at 84.31%
5      40aa, >Antimicrobial... at 85.00%
6      57aa, >Antimicrobial... at 71.93%
7      57aa, >Antimicrobial... at 66.67%
8      57aa, >Antimicrobial... at 70.18%
9      51aa, >Antimicrobial... at 54.90%
10     57aa, >Antimicrobial... at 68.42%
11     37aa, >antibacterial06813... *
12     36aa, >antibacterial07661... at 41.67%
13     38aa, >antibacterial09656... at 65.79%
14     24aa, >antibacterial11518... at 70.83%
>Cluster 777
0      57aa, >Antimicrobial... *
>Cluster 778
0      54aa, >Antimicrobial... at 61.11%
1      57aa, >Antimicrobial... *
2      48aa, >antimicrobial... at 41.67%
3      40aa, >antibacterial09288... at 57.50%
4      39aa, >antibacterial09299... at 74.36%
5      39aa, >antibacterial09300... at 82.05%
>Cluster 779
0      47aa, >Antimicrobial... at 42.55%
1      47aa, >Antimicrobial... at 44.68%
2      56aa, >Antimicrobial... at 57.14%
3      57aa, >Antimicrobial... *
>Cluster 780
0      57aa, >Antimicrobial... *
>Cluster 781
0      57aa, >Antimicrobial... *
1      57aa, >Antimicrobial... at 61.40%
>Cluster 782
0      55aa, >antibacterial... at 79.09%
1      57aa, >antibacterial10351... *
>Cluster 783
0      56aa, >anti-Gram+... *
1      18aa, >antibacterial09659... at 44.44%
>Cluster 784
0      39aa, >antimicrobial... at 41.03%
1      24aa, >antimicrobial... at 41.67%
2      56aa, >anti-Gram+;Antibact... *
3      23aa, >Antimicrobial... at 52.17%
>Cluster 785
0      37aa, >antibacterial;antim... at 45.95%
1      56aa, >Antifungal;Antimicr... *
2      27aa, >anti-Gram+;antibact... at 44.44%
3      34aa, >antibacterial08260... at 44.12%
>Cluster 786
0      43aa, >Antimicrobial... at 81.40%
1      38aa, >Antimicrobial... at 55.26%
2      56aa, >Antimicrobial... *
3      42aa, >Antimicrobial... at 61.90%
>Cluster 787
0      56aa, >Antimicrobial... *
>Cluster 788

```

```

0      56aa, >Antimicrobial... *
1      56aa, >Antimicrobial... at 62.50%
>Cluster 789
0      56aa, >Antimicrobial... *
>Cluster 790
0      56aa, >Antimicrobial... *
>Cluster 791
0      56aa, >Antimicrobial... *
>Cluster 792
0      56aa, >Antimicrobial... *
>Cluster 793
0      56aa, >Antimicrobial... *
1      20aa, >antibacterial08253... at 45.00%
>Cluster 794
0      56aa, >Antimicrobial... *
1      21aa, >antibacterial11916... at 47.62%
>Cluster 795
0      56aa, >antibacterial07137... *
>Cluster 796
0      56aa, >antibacterial07345... *
>Cluster 797
0      35aa, >antibacterial06494... at 42.86%
1      34aa, >antibacterial09869... at 61.76%
2      55aa, >antibacterial11097... at 67.27%
3      56aa, >antibacterial11119... *
4      27aa, >antibacterial11334... at 70.37%
5      36aa, >antibacterial11550... at 47.22%
6      36aa, >antibacterial11575... at 77.78%
7      36aa, >antibacterial112398... at 69.44%
8      38aa, >antibacterial112665... at 50.00%
9      38aa, >antibacterial112666... at 68.42%
10     36aa, >antibacterial112703... *
11     36aa, >antibacterial113087... at 55.56%
12     38aa, >antibacterial113197... at 44.74%
13     38aa, >antibacterial113198... at 47.37%
14     38aa, >antibacterial113199... at 55.26%
15     32aa, >antibacterial113236... at 53.12%
16     37aa, >antibacterial113338... at 56.76%
17     37aa, >antibacterial113340... at 62.16%
18     34aa, >antibacterial113341... at 65.29%
19     36aa, >antibacterial113344... at 66.11%
20     39aa, >antibacterial113356... at 56.41%
21     36aa, >antibacterial113417... *
22     36aa, >antibacterial113418... at 83.33%
>Cluster 798
0      55aa, >Antimicrobial... *
1      39aa, >antimicrobial... at 41.03%
2      48aa, >antifungal;antimicr... at 60.42%
>Cluster 799
0      55aa, >anti-Gram+;Antibact... *
>Cluster 800
0      55aa, >Antimicrobial... *
1      44aa, >Antimicrobial... at 68.64%
>Cluster 801

```

```
0      55aa, >anti-Gram+... *
1      23aa, >antimicrobial... at 33.48%
2      55aa, >anti-Gram+... at 74.55%
>Cluster 802
0      55aa, >Antimicrobial... *
1      55aa, >Antimicrobial... at 79.09%
>Cluster 803
0      55aa, >Antimicrobial... *
1      37aa, >antibacterial10713... at 54.05%
>Cluster 804
0      55aa, >Antimicrobial... *
>Cluster 805
0      55aa, >Antimicrobial... *
>Cluster 806
0      55aa, >Antimicrobial... *
1      26aa, >antibacterial10879... at 84.62%
>Cluster 807
0      55aa, >Antimicrobial... *
>Cluster 808
0      53aa, >Antimicrobial... at 47.17%
1      55aa, >Antimicrobial... *
2      30aa, >antibacterial10744... at 80.00%
3      31aa, >antibacterial10873... at 61.29%
>Cluster 809
0      55aa, >Antimicrobial... *
>Cluster 810
0      55aa, >anti-Gram+;Antibact... *
>Cluster 811
0      55aa, >anti-Gram+;antifung... *
>Cluster 812
0      55aa, >antibacterial106544... *
1      53aa, >antibacterial107233... at 47.17%
>Cluster 813
0      55aa, >antibacterial107263... *
>Cluster 814
0      55aa, >antibacterial110968... *
>Cluster 815
0      33aa, >Antimicrobial... at 66.67%
1      28aa, >Antimicrobial... at 50.00%
2      54aa, >Antimicrobial... *
3      29aa, >Antimicrobial... at 76.21%
4      26aa, >antimicrobial... at 42.31%
5      30aa, >Antimicrobial... at 73.33%
6      22aa, >Antimicrobial... at 68.18%
7      34aa, >antibacterial106962... at 75.29%
8      17aa, >antibacterial107695... *
9      14aa, >antibacterial108297... at 42.86%
10     18aa, >antibacterial109543... at 44.44%
11     13aa, >antibacterial109580... at 53.85%
12     35aa, >antibacterial109766... at 45.71%
13     23aa, >antibacterial109774... at 60.87%
14     33aa, >antibacterial111655... at 63.64%
15     13aa, >antibacterial111737... at 46.15%
16     16aa, >antibacterial112992... at 50.00%
```

```

>Cluster 816
0      54aa, >Antimicrobial... *
1      51aa, >Antimicrobial... at 47.06%
>Cluster 817
0      54aa, >Antimicrobial... *
>Cluster 818
0      48aa, >Antimicrobial... at 45.83%
1      54aa, >Antimicrobial... *
>Cluster 819
0      27aa, >antimicrobial... at 44.44%
1      54aa, >anti-Gram+;Antibact... *
2      25aa, >antimicrobial... at 35.00%
>Cluster 820
0      54aa, >Antimicrobial... *
>Cluster 821
0      22aa, >Antibacterial;Gram-... at 40.91%
1      54aa, >antibacterial07703... *
>Cluster 822
0      37aa, >antimicrobial... at 43.24%
1      37aa, >antibacterial;Gram-... at 43.24%
2      37aa, >Antibacterial... at 83.78%
3      46aa, >antibacterial08114... at 71.74%
4      52aa, >antibacterial08213... at 80.38%
5      54aa, >antibacterial08214... *
6      17aa, >antibacterial08271... at 38.82%
7      39aa, >antibacterial09061... at 43.59%
8      39aa, >antibacterial09628... *
9      37aa, >antibacterial10682... at 48.65%
>Cluster 823
0      53aa, >Antibacterial... *
1      53aa, >Antimicrobial... at 69.81%
2      34aa, >Antimicrobial... at 76.47%
>Cluster 824
0      43aa, >Antibacterial... at 83.02%
1      53aa, >Antibacterial... *
>Cluster 825
0      51aa, >Antimicrobial... at 49.02%
1      53aa, >Antimicrobial... *
2      51aa, >Antibacterial;Antim... at 45.10%
3      44aa, >anti-Gram+;antibact... at 43.18%
4      13aa, >antibacterial06593... at 53.85%
5      13aa, >antibacterial09560... at 46.15%
6      13aa, >antibacterial10392... at 53.85%
>Cluster 826
0      51aa, >Antimicrobial... at 41.18%
1      51aa, >Antimicrobial... at 41.18%
2      51aa, >Antimicrobial... at 45.10%
3      43aa, >Antimicrobial... at 41.86%
4      49aa, >Antimicrobial... at 44.90%
5      51aa, >Antimicrobial... at 43.14%
6      53aa, >Antimicrobial... *
7      51aa, >Antimicrobial... at 43.14%
8      48aa, >Antimicrobial... at 43.75%
9      53aa, >Antimicrobial... at 45.28%

```

```

10    44aa, >Antimicrobial... at 47.73%
11    47aa, >Antimicrobial... at 40.43%
>Cluster 827
0     53aa, >Antimicrobial... *
>Cluster 828
0     31aa, >Antibacterial;Antim... at 61.29%
1     53aa, >Antimicrobial... *
2     45aa, >Antimicrobial... at 35.00%
>Cluster 829
0     50aa, >Antimicrobial... at 58.00%
1     53aa, >antibacterial10732... *
>Cluster 830
0     53aa, >antibacterial10885... *
1     20aa, >antibacterial11972... at 35.00%
2     50aa, >antibacterial13414... at 84.00%
>Cluster 831
0     52aa, >anti-Gram+;Gram-... *
>Cluster 832
0     52aa, >antifungal... *
>Cluster 833
0     52aa, >antifungal... *
>Cluster 834
0     52aa, >Antimicrobial... *
1     44aa, >Antimicrobial... at 40.91%
>Cluster 835
0     52aa, >Antimicrobial... *
>Cluster 836
0     52aa, >Antimicrobial... *
>Cluster 837
0     23aa, >antimicrobial... at 43.48%
1     35aa, >antibacterial109693... at 45.71%
2     52aa, >antibacterial10296... *
3     33aa, >antibacterial10297... at 66.67%
4     48aa, >antibacterial10302... at 45.83%
5     48aa, >antibacterial10305... *
6     28aa, >antibacterial10308... at 57.14%
7     30aa, >antibacterial11548... at 35.00%
8     23aa, >antibacterial112369... at 47.83%
>Cluster 838
0     51aa, >Antimicrobial... *
1     47aa, >Antimicrobial... at 65.96%
2     51aa, >Antimicrobial... at 68.16%
3     23aa, >anti-Gram+;Antimicr... at 43.48%
4     26aa, >antifungal... at 42.31%
>Cluster 839
0     51aa, >anti-Gram+;Antibact... *
1     26aa, >antibacterial11645... at 42.31%
>Cluster 840
0     51aa, >Antifungal;Gram-... *
>Cluster 841
0     51aa, >Antimicrobial... *
1     51aa, >Antimicrobial... at 78.43%
>Cluster 842
0     44aa, >Antimicrobial... at 40.91%

```

```

1      51aa, >Antimicrobial... *
2      44aa, >Antimicrobial... at 43.18%
3      23aa, >antibacterial09966... at 43.48%
>Cluster 843
0      51aa, >Antimicrobial... *
>Cluster 844
0      51aa, >antibacterial;antim... *
>Cluster 845
0      50aa, >Antimicrobial... at 46.00%
1      51aa, >Antimicrobial... *
>Cluster 846
0      51aa, >anti-Gram+;Gram-... *
1      38aa, >anti-Gram+... at 50.00%
>Cluster 847
0      51aa, >anti-Gram+;Antibact... *
>Cluster 848
0      48aa, >antimicrobial... at 41.67%
1      51aa, >anti-Gram+;Gram-... *
>Cluster 849
0      29aa, >anti-Gram+;Antibact... at 41.38%
1      51aa, >antibacterial06511... *
>Cluster 850
0      39aa, >antifungal;antimicr... at 43.59%
1      51aa, >antibacterial07538... *
>Cluster 851
0      51aa, >antibacterial08464... *
>Cluster 852
0      50aa, >antimicrobial... *
1      49aa, >antimicrobial... at 53.06%
2      50aa, >antimicrobial... at 48.00%
3      50aa, >antimicrobial... at 46.00%
>Cluster 853
0      50aa, >antimicrobial... *
1      45aa, >antimicrobial... at 35.00%
>Cluster 854
0      50aa, >antimicrobial... *
>Cluster 855
0      47aa, >antimicrobial... at 57.45%
1      47aa, >antimicrobial... at 63.83%
2      50aa, >antimicrobial... *
>Cluster 856
0      28aa, >anti-Gram+;antibact... at 42.86%
1      50aa, >antibacterial;antif... *
>Cluster 857
0      50aa, >antibacterial;antim... *
>Cluster 858
0      50aa, >Antimicrobial... *
>Cluster 859
0      49aa, >antifungal;antimicr... at 46.94%
1      49aa, >antifungal;antimicr... at 46.94%
2      49aa, >antifungal;antimicr... at 48.98%
3      49aa, >antifungal;antimicr... at 44.90%
4      50aa, >antifungal;antimicr... *
>Cluster 860

```

```
0      50aa, >anti-Gram+;Gram-... *
>Cluster 861
0      50aa, >antimicrobial... *
1      37aa, >antibacterial08502... at 40.54%
>Cluster 862
0      50aa, >antibacterial07607... *
1      50aa, >antibacterial07608... at 72.00%
>Cluster 863
0      49aa, >antimicrobial... *
>Cluster 864
0      49aa, >antibacterial;Antif... *
>Cluster 865
0      49aa, >antimicrobial... *
>Cluster 866
0      21aa, >antimicrobial... at 47.62%
1      49aa, >antimicrobial... *
2      30aa, >antibacterial13385... at 35.00%
>Cluster 867
0      49aa, >antimicrobial... *
>Cluster 868
0      49aa, >antimicrobial... *
1      49aa, >antimicrobial... at 53.06%
>Cluster 869
0      49aa, >antimicrobial... *
>Cluster 870
0      49aa, >antimicrobial... *
>Cluster 871
0      49aa, >antimicrobial... *
>Cluster 872
0      49aa, >antimicrobial... *
>Cluster 873
0      16aa, >antimicrobial... at 43.75%
1      49aa, >Antimicrobial... *
>Cluster 874
0      49aa, >Antimicrobial... *
>Cluster 875
0      38aa, >Antimicrobial... at 42.11%
1      49aa, >Antimicrobial... *
2      47aa, >Antimicrobial... at 40.43%
>Cluster 876
0      49aa, >Antimicrobial... *
>Cluster 877
0      11aa, >antibacterial08300... at 45.45%
1      49aa, >antibacterial12381... *
>Cluster 878
0      48aa, >antimicrobial... *
1      45aa, >antimicrobial... at 75.56%
>Cluster 879
0      48aa, >antifungal;antimicr... *
1      48aa, >antibacterial... at 41.67%
>Cluster 880
0      48aa, >Antimicrobial... *
>Cluster 881
0      48aa, >Antibacterial;Antim... *
```



```
1      24aa, >antibacterial08124... at 41.67%
>Cluster 882
0      48aa, >antibacterial;antim... *
1      31aa, >anti-Gram-;antibact... at 41.94%
2      32aa, >anti-Gram+;Antibact... at 40.62%
>Cluster 883
0      48aa, >antimicrobial... *
>Cluster 884
0      48aa, >antimicrobial;antiv... *
1      31aa, >antimicrobial;antiv... at 80.32%
2      36aa, >antimicrobial;antiv... at 52.78%
3      18aa, >antibacterial09674... at 44.44%
>Cluster 885
0      48aa, >anti-Gram+;antifung... *
>Cluster 886
0      48aa, >Antimicrobial... *
>Cluster 887
0      48aa, >Antimicrobial... *
1      21aa, >antibacterial07414... at 42.86%
>Cluster 888
0      48aa, >Antimicrobial... *
>Cluster 889
0      48aa, >Antimicrobial... *
>Cluster 890
0      46aa, >antimicrobial... at 43.48%
1      48aa, >antimicrobial... *
2      39aa, >antimicrobial... at 51.28%
3      42aa, >antimicrobial... at 42.86%
4      43aa, >antimicrobial... at 60.47%
>Cluster 891
0      48aa, >antimicrobial... *
>Cluster 892
0      48aa, >antibacterial06688... *
>Cluster 893
0      48aa, >antibacterial07432... *
1      48aa, >antibacterial07433... at 67.50%
2      31aa, >antibacterial07437... at 48.39%
3      23aa, >antibacterial07924... at 43.48%
4      48aa, >antibacterial08571... at 79.58%
>Cluster 894
0      48aa, >antibacterial07492... *
1      36aa, >antibacterial10515... at 44.44%
>Cluster 895
0      48aa, >antibacterial10220... *
>Cluster 896
0      33aa, >antibacterial06459... at 48.48%
1      33aa, >antibacterial06483... at 51.52%
2      33aa, >antibacterial06522... at 54.55%
3      33aa, >antibacterial07056... at 54.55%
4      33aa, >antibacterial07064... at 54.55%
5      48aa, >antibacterial11299... *
>Cluster 897
0      26aa, >antibacterial;antim... at 42.31%
1      48aa, >antibacterial11524... *
```

```

2    41aa, >antibacterial11662... at 82.93%
3    35aa, >antibacterial12102... at 85.71%
4    46aa, >antibacterial12103... at 81.30%
5    37aa, >antibacterial12130... at 81.08%
6    40aa, >antibacterial12477... at 52.50%
7    39aa, >antibacterial12842... at 36.15%
8    42aa, >antibacterial13015... at 41.90%
>Cluster 898
0    21aa, >antimicrobial... at 47.62%
1    48aa, >antibacterial11563... *
>Cluster 899
0    47aa, >Antifungal... *
>Cluster 900
0    47aa, >Antimicrobial... *
>Cluster 901
0    47aa, >antimicrobial... *
1    18aa, >antibacterial12810... at 44.44%
>Cluster 902
0    43aa, >Antimicrobial... at 60.47%
1    47aa, >antibacterial;antim... *
2    46aa, >antimicrobial... at 54.35%
3    46aa, >antimicrobial... at 56.52%
4    38aa, >antimicrobial... at 44.74%
5    38aa, >antimicrobial... at 47.37%
6    32aa, >antibacterial11732... at 40.62%
>Cluster 903
0    47aa, >Antimicrobial... *
1    47aa, >Antimicrobial... at 80.85%
>Cluster 904
0    47aa, >antibacterial;antim... *
>Cluster 905
0    26aa, >antimicrobial... at 57.69%
1    26aa, >antimicrobial... at 80.77%
2    27aa, >antimicrobial... at 48.15%
3    47aa, >antimicrobial... *
4    29aa, >antimicrobial... at 62.07%
5    29aa, >antimicrobial... at 83.10%
>Cluster 906
0    47aa, >antimicrobial... *
>Cluster 907
0    47aa, >Antimicrobial... *
>Cluster 908
0    47aa, >Antimicrobial... *
1    44aa, >Antibacterial... at 40.91%
>Cluster 909
0    40aa, >Antimicrobial... at 35.00%
1    47aa, >Antimicrobial... *
2    47aa, >Antimicrobial... at 67.36%
>Cluster 910
0    21aa, >antimicrobial... at 42.86%
1    47aa, >antimicrobial... *
2    30aa, >antibacterial13196... at 35.00%
>Cluster 911
0    46aa, >Antimicrobial... at 47.83%

```

```

1      47aa, >Antimicrobial... *
>Cluster 912
0      38aa, >antimicrobial... at 42.11%
1      47aa, >Antimicrobial... *
>Cluster 913
0      47aa, >anti-Gram+... *
>Cluster 914
0      38aa, >antimicrobial... at 44.74%
1      38aa, >antimicrobial... at 44.74%
2      36aa, >antimicrobial... at 41.67%
3      33aa, >antimicrobial... at 51.52%
4      33aa, >antimicrobial... at 51.52%
5      47aa, >antimicrobial... *
6      18aa, >antibacterial09899... at 44.44%
>Cluster 915
0      46aa, >antimicrobial... *
>Cluster 916
0      46aa, >antiviral... *
>Cluster 917
0      46aa, >anti-Gram+;Antibact... *
>Cluster 918
0      46aa, >Antimicrobial... *
>Cluster 919
0      46aa, >Antibacterial;Antim... *
1      33aa, >Antimicrobial... at 42.42%
>Cluster 920
0      46aa, >Antimicrobial... *
1      44aa, >Antimicrobial... at 43.18%
>Cluster 921
0      38aa, >Antimicrobial... at 47.37%
1      46aa, >Antimicrobial... *
2      36aa, >Antimicrobial... at 41.67%
3      22aa, >antibacterial11452... at 40.91%
>Cluster 922
0      46aa, >Antimicrobial... *
1      44aa, >Antimicrobial... at 81.82%
>Cluster 923
0      46aa, >anti-Gram+;Antibact... *
>Cluster 924
0      46aa, >Antimicrobial... *
1      46aa, >Antimicrobial... at 52.17%
>Cluster 925
0      46aa, >Antimicrobial... *
>Cluster 926
0      46aa, >Antimicrobial... *
>Cluster 927
0      46aa, >Antimicrobial... *
>Cluster 928
0      46aa, >Antimicrobial... *
>Cluster 929
0      28aa, >Antimicrobial;Antim... at 42.86%
1      46aa, >antimicrobial... *
>Cluster 930
0      46aa, >antibacterial06507... *

```

```
>Cluster 931
0      46aa, >antibacterial09665... *
>Cluster 932
0      34aa, >antibacterial12603... at 55.88%
1      46aa, >antibacterial12702... *
>Cluster 933
0      38aa, >antibacterial12682... at 65.79%
1      46aa, >antibacterial12830... *
2      46aa, >antibacterial12839... at 71.74%
>Cluster 934
0      46aa, >antibacterial12986... *
>Cluster 935
0      45aa, >antibacterial;antim... *
>Cluster 936
0      45aa, >antifungal;antimicr... *
>Cluster 937
0      45aa, >anti-Gram-;anti-HIV... *
1      37aa, >Antimicrobial... at 40.54%
2      28aa, >Antimicrobial... at 42.86%
3      32aa, >antibacterial;antim... at 40.62%
>Cluster 938
0      45aa, >Antibacterial... *
1      45aa, >antibacterial09667... at 55.56%
2      45aa, >antibacterial09771... at 62.22%
3      45aa, >antibacterial09772... at 64.44%
4      45aa, >antibacterial10680... at 62.22%
5      44aa, >antibacterial10773... at 47.73%
6      45aa, >antibacterial11812... at 62.22%
7      45aa, >antibacterial11813... at 62.22%
8      45aa, >antibacterial11814... at 62.22%
9      45aa, >antibacterial11815... at 62.22%
>Cluster 939
0      45aa, >Antimicrobial... *
1      33aa, >antibacterial10947... at 60.61%
>Cluster 940
0      13aa, >Gram-... at 46.15%
1      45aa, >Antimicrobial... *
>Cluster 941
0      45aa, >antimicrobial... *
>Cluster 942
0      45aa, >Antimicrobial... *
1      25aa, >antibacterial11318... at 35.00%
>Cluster 943
0      45aa, >antimicrobial;Antim... *
>Cluster 944
0      45aa, >Antimicrobial... *
1      44aa, >Antimicrobial... at 72.73%
>Cluster 945
0      45aa, >anti-Gram+;antibact... *
>Cluster 946
0      45aa, >antibacterial06868... *
>Cluster 947
0      36aa, >antibacterial06513... at 80.00%
1      35aa, >antibacterial06954... at 81.43%
```

```

2      45aa, >antibacterial110915... *
3      47aa, >antibacterial111496... at 83.33%
4      35aa, >antibacterial113177... at 82.86%
>Cluster 948
0      45aa, >antibacterial111182... *
>Cluster 949
0      34aa, >antibacterial110934... at 78.24%
1      35aa, >antibacterial112023... at 81.43%
2      45aa, >antibacterial112680... *
>Cluster 950
0      22aa, >antibacterial111426... at 40.91%
1      24aa, >antibacterial112609... at 79.17%
2      37aa, >antibacterial113232... at 56.76%
3      45aa, >antibacterial113368... *
>Cluster 951
0      44aa, >anti-Gram+... *
1      44aa, >anti-Gram+... at 84.09%
>Cluster 952
0      44aa, >anti-Gram+;antibact... *
1      43aa, >antimicrobial.... at 58.14%
2      44aa, >antimicrobial.... at 75.00%
3      28aa, >Antimicrobial... at 36.43%
4      22aa, >antibacterial108760... at 40.91%
5      41aa, >antibacterial110998... at 65.85%
6      23aa, >antibacterial111131... at 52.17%
>Cluster 953
0      44aa, >anti-Gram+;antibact... *
>Cluster 954
0      24aa, >antimicrobial... at 41.67%
1      44aa, >anti-Gram+;antibact... *
>Cluster 955
0      44aa, >anti-Gram+;Antibact... *
1      38aa, >anti-Gram+;Antibact... at 55.26%
>Cluster 956
0      39aa, >antibacterial;antim... at 64.10%
1      44aa, >antibacterial... *
2      15aa, >antibacterial110170... at 66.67%
>Cluster 957
0      44aa, >Antimicrobial... *
>Cluster 958
0      44aa, >Antimicrobial... *
1      44aa, >antibacterial;antim... at 54.55%
2      44aa, >Antibacterial... at 54.55%
3      44aa, >Antimicrobial... at 70.45%
>Cluster 959
0      44aa, >Antimicrobial... *
1      44aa, >Antimicrobial... at 45.45%
>Cluster 960
0      44aa, >Antimicrobial... *
>Cluster 961
0      44aa, >antimicrobial... *
>Cluster 962
0      44aa, >Antimicrobial... *
>Cluster 963

```

```

0      37aa, >anti-Gram+;antibact... at 48.65%
1      44aa, >anti-Gram+;Antibact... *
>Cluster 964
0      44aa, >anti-Gram+;antibact... *
1      35aa, >antibacterial12643... at 45.71%
2      35aa, >antibacterial12668... at 48.57%
>Cluster 965
0      40aa, >antibacterial;antim... at 62.50%
1      24aa, >antibacterial;Antif... at 66.67%
2      24aa, >anti-Gram+;Antibact... at 66.67%
3      34aa, >antimicrobial... at 41.18%
4      24aa, >anti-Gram+;Antibact... *
5      27aa, >antimicrobial... at 44.44%
6      44aa, >Antimicrobial... *
7      44aa, >Antimicrobial... at 77.27%
8      44aa, >Antimicrobial... at 75.00%
9      44aa, >Antimicrobial... at 86.36%
10     44aa, >Antimicrobial... at 72.73%
11     44aa, >Antimicrobial... at 72.73%
12     44aa, >Antimicrobial... at 79.55%
13     44aa, >Antimicrobial... at 86.36%
14     44aa, >Antimicrobial... at 86.36%
15     24aa, >antibacterial... at 62.50%
16     21aa, >antibacterial... *
17     13aa, >antibacterial... at 46.15%
>Cluster 966
0      44aa, >Antimicrobial... *
>Cluster 967
0      41aa, >antibacterial;Antif... at 70.73%
1      44aa, >antimicrobial... *
2      44aa, >antimicrobial... at 56.82%
3      44aa, >antimicrobial... at 56.82%
4      44aa, >antimicrobial... at 75.00%
>Cluster 968
0      44aa, >antibacterial110882... *
>Cluster 969
0      23aa, >Antimicrobial... at 43.48%
1      41aa, >antibacterial111553... at 78.05%
2      42aa, >antibacterial111554... at 66.67%
3      43aa, >antibacterial111589... at 60.47%
4      44aa, >antibacterial111590... *
>Cluster 970
0      41aa, >antibacterial111421... at 53.66%
1      35aa, >antibacterial112716... at 35.00%
2      28aa, >antibacterial112765... at 46.43%
3      44aa, >antibacterial112783... *
>Cluster 971
0      43aa, >antimicrobial;antiv... *
1      30aa, >antibacterial113122... at 35.00%
>Cluster 972
0      43aa, >anti-Gram+;antimicr... *
>Cluster 973
0      43aa, >antibacterial;Antif... *
1      18aa, >antibacterial112921... at 44.44%

```

```
>Cluster 974
0    43aa, >Antimicrobial... *
>Cluster 975
0    43aa, >antibacterial;antim... *
>Cluster 976
0    43aa, >Antimicrobial... *
1    20aa, >antibacterial09117... at 35.00%
>Cluster 977
0    43aa, >antimicrobial... *
>Cluster 978
0    43aa, >anti-Gram+;antibact... *
1    27aa, >antibacterial08429... at 55.56%
>Cluster 979
0    28aa, >anti-Gram-;Antibact... at 42.86%
1    43aa, >Antimicrobial... *
>Cluster 980
0    43aa, >Antibacterial;Antim... *
>Cluster 981
0    43aa, >Antimicrobial... *
>Cluster 982
0    40aa, >antibacterial;antif... at 70.00%
1    43aa, >antibacterial;antim... *
>Cluster 983
0    43aa, >anti-Gram+;antibact... *
1    11aa, >antibacterial08110... at 45.45%
>Cluster 984
0    43aa, >Antimicrobial... *
1    43aa, >Antibacterial... at 76.74%
2    43aa, >antibacterial10829... at 67.44%
>Cluster 985
0    42aa, >Antibacterial;antim... at 42.86%
1    39aa, >antimicrobial... at 41.03%
2    39aa, >antimicrobial... at 46.15%
3    39aa, >antimicrobial... at 41.03%
4    43aa, >anti-Gram-... *
5    37aa, >antibacterial07527... at 40.54%
>Cluster 986
0    43aa, >antibacterial;antim... *
>Cluster 987
0    43aa, >antimicrobial... *
>Cluster 988
0    43aa, >antimicrobial... *
1    41aa, >antimicrobial... at 83.02%
>Cluster 989
0    40aa, >antibacterial06621... at 65.00%
1    43aa, >antibacterial06622... *
2    32aa, >antibacterial06643... at 68.75%
3    38aa, >antibacterial06656... at 57.89%
4    28aa, >antibacterial06686... at 46.43%
5    41aa, >antibacterial07315... at 68.29%
6    40aa, >antibacterial07316... at 62.50%
7    40aa, >antibacterial07317... at 70.00%
8    31aa, >antibacterial07429... at 41.94%
9    20aa, >antibacterial10124... at 45.00%
```

```

>Cluster 990
0      43aa, >antibacterial09662... *
1      43aa, >antibacterial09663... at 72.09%
>Cluster 991
0      43aa, >antibacterial10677... *
>Cluster 992
0      43aa, >antibacterial13063... *
>Cluster 993
0      43aa, >antibacterial13208... *
>Cluster 994
0      42aa, >anti-Gram+;Antibact... *
>Cluster 995
0      42aa, >anti-Gram-;antibact... *
>Cluster 996
0      42aa, >antimicrobial... *
>Cluster 997
0      42aa, >antimicrobial... *
>Cluster 998
0      42aa, >Antimicrobial... *
>Cluster 999
0      42aa, >anti-Gram+... *
>Cluster 1000
0      38aa, >antimicrobial;Antim... at 86.47%
1      42aa, >antimicrobial... *
>Cluster 1001
0      42aa, >anti-Gram+;antibact... *
>Cluster 1002
0      42aa, >antimicrobial... *
>Cluster 1003
0      42aa, >Antimicrobial... *
>Cluster 1004
0      42aa, >Antimicrobial... *
1      37aa, >Antimicrobial... at 54.05%
>Cluster 1005
0      42aa, >antimicrobial... *
>Cluster 1006
0      24aa, >antibacterial08139... at 41.67%
1      42aa, >antibacterial08239... *
2      26aa, >antibacterial09223... at 57.69%
3      32aa, >antibacterial09224... at 56.25%
4      31aa, >antibacterial09834... at 58.06%
>Cluster 1007
0      42aa, >antibacterial09657... *
>Cluster 1008
0      35aa, >antibacterial09871... at 62.86%
1      29aa, >antibacterial11547... at 48.28%
2      42aa, >antibacterial11763... *
3      35aa, >antibacterial12026... at 45.71%
4      36aa, >antibacterial13339... at 52.78%
>Cluster 1009
0      39aa, >antibacterial11447... at 48.72%
1      42aa, >antibacterial12747... *
2      42aa, >antibacterial12748... at 57.14%
3      42aa, >antibacterial12753... at 52.38%

```



```

4      42aa, >antibacterial12758... at 47.62%
5      42aa, >antibacterial12759... at 57.14%
6      42aa, >antibacterial12768... at 52.38%
7      28aa, >antibacterial12778... at 42.86%
8      42aa, >antibacterial12781... at 52.38%
9      42aa, >antibacterial12785... at 57.14%
>Cluster 1010
0      36aa, >antibacterial12406... at 78.18%
1      42aa, >antibacterial12786... *
>Cluster 1011
0      41aa, >Antibacterial;Antif... *
>Cluster 1012
0      41aa, >antibacterial;antim... *
1      29aa, >antibacterial11821... at 71.31%
>Cluster 1013
0      41aa, >Antimicrobial... *
>Cluster 1014
0      41aa, >antimicrobial... *
>Cluster 1015
0      41aa, >Antimicrobial... *
>Cluster 1016
0      41aa, >Antimicrobial... *
1      41aa, >Antimicrobial... at 87.80%
>Cluster 1017
0      41aa, >antibacterial107313... *
1      30aa, >antibacterial13257... at 35.00%
>Cluster 1018
0      28aa, >antimicrobial... at 46.43%
1      29aa, >antimicrobial... at 41.38%
2      23aa, >anti-Gram+;antibact... at 56.52%
3      30aa, >antibacterial;antim... at 35.00%
4      41aa, >antibacterial11949... *
>Cluster 1019
0      41aa, >antibacterial11960... *
>Cluster 1020
0      26aa, >antibacterial108597... at 42.31%
1      41aa, >antibacterial12877... *
>Cluster 1021
0      18aa, >antibacterial107970... at 44.44%
1      41aa, >antibacterial13012... *
>Cluster 1022
0      20aa, >anti-Gram+;antibact... at 50.00%
1      24aa, >antibacterial108142... at 45.83%
2      33aa, >antibacterial11401... at 57.58%
3      33aa, >antibacterial11402... at 72.73%
4      30aa, >antibacterial11403... at 66.67%
5      41aa, >antibacterial13279... *
>Cluster 1023
0      41aa, >antibacterial13314... *
>Cluster 1024
0      40aa, >anti-Gram+;antibact... *
1      18aa, >antimicrobial... at 44.44%
>Cluster 1025
0      39aa, >antifungal;antimicr... at 71.79%

```

```

1      40aa, >antifungal;antimicr... *
>Cluster 1026
0      40aa, >anti-Gram+;antibact... *
1      42aa, >antibacterial08978... at 86.50%
>Cluster 1027
0      40aa, >Antimicrobial... *
>Cluster 1028
0      40aa, >Antimicrobial... *
1      18aa, >antibacterial09721... at 44.44%
>Cluster 1029
0      40aa, >antibacterial06670... *
>Cluster 1030
0      40aa, >antibacterial06888... *
>Cluster 1031
0      40aa, >antibacterial10952... *
>Cluster 1032
0      26aa, >antibacterial09054... at 42.31%
1      26aa, >antibacterial12455... at 42.31%
2      40aa, >antibacterial12927... *
>Cluster 1033
0      34aa, >antibacterial11907... at 76.47%
1      36aa, >antibacterial12002... at 61.11%
2      40aa, >antibacterial13421... *
>Cluster 1034
0      39aa, >Antibacterial;Antif... *
1      27aa, >antibacterial08929... at 40.74%
>Cluster 1035
0      39aa, >antimicrobial... *
1      33aa, >antimicrobial... at 81.82%
2      34aa, >antimicrobial... at 73.53%
3      35aa, >antimicrobial... at 77.14%
>Cluster 1036
0      39aa, >Antibacterial;Antim... *
>Cluster 1037
0      39aa, >anti-Gram+;Antibact... *
1      23aa, >antibacterial11803... at 43.48%
>Cluster 1038
0      39aa, >antibacterial;antim... *
>Cluster 1039
0      39aa, >anti-Gram+;antibact... *
>Cluster 1040
0      39aa, >antimicrobial... *
1      39aa, >antimicrobial... at 46.15%
>Cluster 1041
0      39aa, >Antimicrobial... *
>Cluster 1042
0      39aa, >Antimicrobial... *
>Cluster 1043
0      39aa, >antibacterial08491... *
1      21aa, >antibacterial10077... at 80.48%
2      23aa, >antibacterial11917... at 61.30%
>Cluster 1044
0      23aa, >antimicrobial... at 43.48%
1      37aa, >antibacterial07310... at 43.24%

```

```

2      37aa, >antibacterial07374... at 43.24%
3      37aa, >antibacterial07375... at 45.95%
4      25aa, >antibacterial08628... at 35.00%
5      39aa, >antibacterial09062... *
>Cluster 1045
0      39aa, >antibacterial11503... *
>Cluster 1046
0      31aa, >Antibacterial;antim... at 41.94%
1      28aa, >Antibacterial;Antif... at 50.00%
2      33aa, >anti-Gram-;antibact... at 42.42%
3      37aa, >antibacterial;antim... at 40.54%
4      33aa, >antimicrobial... at 69.70%
5      12aa, >antibacterial10140... at 41.67%
6      28aa, >antibacterial11864... at 42.86%
7      39aa, >antibacterial11885... *
>Cluster 1047
0      32aa, >antibacterial07344... at 50.00%
1      39aa, >antibacterial12929... *
>Cluster 1048
0      38aa, >Antimicrobial... *
>Cluster 1049
0      38aa, >antibacterial... *
>Cluster 1050
0      28aa, >Antibacterial;antim... at 42.86%
1      38aa, >antimicrobial... *
>Cluster 1051
0      38aa, >Antifungal;antimicr... *
>Cluster 1052
0      31aa, >Anti-Gram-;Antibact... at 54.84%
1      33aa, >anti-Gram+;antibact... at 42.42%
2      33aa, >anti-Gram+;antibact... at 84.85%
3      28aa, >antibacterial;antim... at 46.43%
4      37aa, >Antimicrobial... at 67.57%
5      38aa, >anti-Gram+;antifung... *
6      28aa, >antibacterial;antim... at 42.86%
7      38aa, >antibacterial11866... at 63.16%
>Cluster 1053
0      38aa, >Antimicrobial... *
1      36aa, >antibacterial06542... at 86.11%
2      13aa, >antibacterial07567... at 53.85%
3      35aa, >antibacterial09294... at 35.00%
>Cluster 1054
0      38aa, >antimicrobial... *
1      38aa, >antimicrobial... at 81.58%
2      38aa, >antimicrobial... at 86.84%
3      38aa, >antimicrobial... at 73.68%
4      38aa, >antimicrobial... at 65.79%
5      38aa, >antimicrobial... at 74.21%
6      38aa, >antimicrobial... at 72.47%
7      38aa, >antimicrobial... at 73.68%
8      38aa, >antimicrobial... at 86.84%
9      38aa, >antimicrobial... at 71.58%
10     38aa, >antimicrobial... at 82.47%
11     39aa, >antimicrobial... at 82.47%

```

```
12    39aa, >antimicrobial... at 84.21%
13    39aa, >antimicrobial... at 58.95%
14    27aa, >antibacterial08930... at 40.74%
>Cluster 1055
0     36aa, >antimicrobial... at 47.22%
1     38aa, >antimicrobial... *
>Cluster 1056
0     38aa, >Antimicrobial... *
>Cluster 1057
0     38aa, >antimicrobial... *
>Cluster 1058
0     33aa, >antibacterial;antim... at 42.42%
1     38aa, >Antimicrobial... *
2     37aa, >Antimicrobial... at 43.24%
>Cluster 1059
0     38aa, >Antifungal;antimicr... *
>Cluster 1060
0     38aa, >antifungal;antimicr... *
1     38aa, >antifungal;antimicr... at 65.79%
>Cluster 1061
0     38aa, >antibacterial08236... *
>Cluster 1062
0     28aa, >anti-Gram+;antibact... at 67.86%
1     28aa, >antimicrobial... at 75.00%
2     38aa, >antibacterial08421... *
>Cluster 1063
0     38aa, >antibacterial10725... *
>Cluster 1064
0     14aa, >antibacterial08766... at 42.86%
1     14aa, >antibacterial08767... at 42.86%
2     14aa, >antibacterial08768... at 50.00%
3     14aa, >antibacterial08769... at 42.86%
4     15aa, >antibacterial08770... at 42.86%
5     15aa, >antibacterial08771... at 42.86%
6     15aa, >antibacterial08772... at 42.86%
7     15aa, >antibacterial08773... at 50.00%
8     15aa, >antibacterial08774... at 50.00%
9     38aa, >antibacterial10797... *
>Cluster 1065
0     37aa, >anti-Gram-;antibact... at 51.35%
1     37aa, >antibacterial07899... at 64.86%
2     38aa, >antibacterial10798... *
>Cluster 1066
0     23aa, >antibacterial07927... at 43.48%
1     27aa, >antibacterial11098... at 40.74%
2     25aa, >antibacterial11961... at 84.00%
3     38aa, >antibacterial13379... *
>Cluster 1067
0     35aa, >antibacterial;antif... at 54.29%
1     34aa, >Antimicrobial... at 70.59%
2     34aa, >Antimicrobial... at 71.18%
3     37aa, >Antimicrobial... *
4     37aa, >Antimicrobial... at 84.19%
5     37aa, >Antimicrobial... at 81.89%
```

```

6      37aa, >Antimicrobial... at 72.97%
7      37aa, >Antimicrobial... at 84.19%
8      37aa, >Antimicrobial... at 44.05%
9      37aa, >Antimicrobial... at 41.35%
10     23aa, >Antibacterial;antim... at 33.48%
>Cluster 1068
0      37aa, >anti-Gram-;antifung... *
>Cluster 1069
0      30aa, >anti-Gram+;antibact... at 46.67%
1      30aa, >antibacterial;antim... at 60.00%
2      34aa, >Antifungal;Antimicr... at 58.82%
3      37aa, >antibacterial;antim... *
4      33aa, >antimicrobial... at 63.64%
5      33aa, >anti-Gram+;Antibact... at 42.42%
6      33aa, >anti-Gram-;antibact... at 45.45%
7      33aa, >anti-Gram+;antibact... at 66.67%
8      33aa, >anti-Gram+;antibact... at 60.61%
9      33aa, >anti-Gram+;Antibact... at 48.48%
10     33aa, >anti-Gram+;Antibact... at 51.52%
11     33aa, >antimicrobial... at 48.48%
12     33aa, >Antimicrobial... at 54.55%
13     33aa, >antimicrobial... at 48.48%
14     33aa, >Antimicrobial... at 66.67%
15     31aa, >antimicrobial... at 45.16%
16     31aa, >antimicrobial... at 45.16%
17     33aa, >anti-Gram+;Antibact... at 51.52%
18     33aa, >antimicrobial... at 42.42%
19     33aa, >Antimicrobial... at 42.42%
20     33aa, >anti-Gram+;antifung... at 42.42%
21     33aa, >antimicrobial... at 48.48%
22     35aa, >antimicrobial... at 42.86%
23     33aa, >antimicrobial... at 42.42%
24     33aa, >anti-Gram+;Antibact... at 45.45%
25     30aa, >antibacterial11753... at 46.67%
26     33aa, >antibacterial11778... at 63.64%
27     33aa, >antibacterial11819... at 66.67%
28     33aa, >antibacterial11822... at 69.70%
29     33aa, >antibacterial11862... at 63.64%
30     34aa, >antibacterial13017... at 50.00%
>Cluster 1070
0      27aa, >anti-Gram+;antibact... at 44.44%
1      37aa, >antibacterial;antim... *
>Cluster 1071
0      37aa, >Antibacterial... *
1      37aa, >Antibacterial;Antif... at 86.19%
2      37aa, >antibacterial10586... at 81.08%
3      37aa, >antibacterial10587... at 86.19%
>Cluster 1072
0      37aa, >antibacterial06503... *
>Cluster 1073
0      37aa, >antibacterial08020... *
>Cluster 1074
0      37aa, >antibacterial11749... *
1      36aa, >antibacterial12025... at 80.56%

```

```
>Cluster 1075
0    23aa, >antifungal;antimicr... at 65.22%
1    36aa, >antifungal;antimicr... *
2    23aa, >antifungal;antimicr... at 47.83%
>Cluster 1076
0    36aa, >antibacterial;antim... *
>Cluster 1077
0    24aa, >Antibacterial;Antif... at 45.83%
1    36aa, >antifungal... *
>Cluster 1078
0    36aa, >antimicrobial... *
>Cluster 1079
0    23aa, >antimicrobial... at 43.48%
1    36aa, >antibacterial07267... *
>Cluster 1080
0    36aa, >antibacterial07610... *
1    36aa, >antibacterial07611... at 69.44%
2    36aa, >antibacterial09476... at 75.00%
3    26aa, >antibacterial10295... at 65.38%
>Cluster 1081
0    33aa, >antibacterial08264... at 66.67%
1    36aa, >antibacterial08611... *
>Cluster 1082
0    36aa, >antibacterial09011... *
>Cluster 1083
0    35aa, >antibacterial11603... at 62.86%
1    36aa, >antibacterial11750... *
2    35aa, >antibacterial12108... at 51.43%
3    35aa, >antibacterial12506... at 54.29%
4    35aa, >antibacterial12704... at 71.43%
>Cluster 1084
0    36aa, >antibacterial12114... *
1    35aa, >antibacterial12497... at 45.71%
>Cluster 1085
0    35aa, >antibacterial... at 57.14%
1    36aa, >antibacterial12173... *
>Cluster 1086
0    20aa, >antibacterial09123... at 35.00%
1    32aa, >antibacterial09904... at 43.75%
2    36aa, >antibacterial12608... *
>Cluster 1087
0    33aa, >antibacterial11764... at 57.58%
1    33aa, >antibacterial11766... at 51.52%
2    16aa, >antibacterial12373... at 68.75%
3    36aa, >antibacterial12941... *
>Cluster 1088
0    36aa, >antibacterial13109... *
>Cluster 1089
0    36aa, >antibacterial13331... *
>Cluster 1090
0    36aa, >antibacterial13400... *
>Cluster 1091
0    36aa, >antibacterial13420... *
>Cluster 1092
```

```

0      35aa, >antibacterial;antif... *
1      19aa, >antibacterial10189... at 42.11%
>Cluster 1093
0      35aa, >Antimicrobial... *
>Cluster 1094
0      35aa, >anti-Gram+;Gram-... *
>Cluster 1095
0      32aa, >anti-Gram+;antibact... at 50.25%
1      32aa, >antibacterial;antim... at 70.62%
2      35aa, >antibacterial;antim... *
3      29aa, >antibacterial;antif... at 86.55%
4      35aa, >anti-Gram+;antibact... at 81.43%
>Cluster 1096
0      35aa, >antibacterial06455... *
1      35aa, >antibacterial06457... at 62.86%
2      35aa, >antibacterial06481... at 45.71%
3      35aa, >antibacterial06937... at 71.43%
4      18aa, >antibacterial08619... at 44.44%
>Cluster 1097
0      35aa, >antibacterial07305... *
1      33aa, >antibacterial07306... at 72.73%
>Cluster 1098
0      23aa, >antibacterial08728... at 43.48%
1      35aa, >antibacterial08882... *
2      23aa, >antibacterial09059... at 43.48%
>Cluster 1099
0      35aa, >antibacterial10961... *
>Cluster 1100
0      35aa, >antibacterial111569... *
1      35aa, >antibacterial112107... at 74.29%
2      35aa, >antibacterial113187... at 65.71%
>Cluster 1101
0      34aa, >antibacterial;Antif... *
1      26aa, >antibacterial07761... at 50.00%
2      26aa, >antibacterial111154... at 50.00%
>Cluster 1102
0      34aa, >anti-Gram-... *
1      34aa, >antibacterial08261... at 41.18%
>Cluster 1103
0      34aa, >antibacterial;antim... *
>Cluster 1104
0      34aa, >anti-Gram+;antibact... *
>Cluster 1105
0      11aa, >antibacterial07864... at 54.55%
1      34aa, >antibacterial07878... *
2      19aa, >antibacterial07890... at 52.63%
3      33aa, >antibacterial08002... at 57.58%
4      11aa, >antibacterial09190... at 45.45%
5      14aa, >antibacterial09262... at 42.86%
6      15aa, >antibacterial09648... at 46.67%
7      15aa, >antibacterial09649... at 53.33%
8      15aa, >antibacterial09650... at 35.00%
9      15aa, >antibacterial09651... at 46.67%
10     15aa, >antibacterial09652... at 46.67%

```

```

11    15aa, >antibacterial09653... at 60.00%
12    19aa, >antibacterial09699... at 42.11%
13    15aa, >antibacterial09921... at 35.00%
14    20aa, >antibacterial09935... at 35.00%
15    19aa, >antibacterial09938... at 57.89%
16    20aa, >antibacterial10325... at 45.00%
17    20aa, >antibacterial10623... at 45.00%
>Cluster 1106
0      18aa, >antibacterial07971... at 44.44%
1      32aa, >antibacterial08552... at 56.25%
2      34aa, >antibacterial08555... *
3      28aa, >antibacterial08556... at 67.86%
4      28aa, >antibacterial08557... at 46.43%
>Cluster 1107
0      34aa, >antibacterial11504... *
>Cluster 1108
0      34aa, >antibacterial112646... *
>Cluster 1109
0      34aa, >antibacterial112671... *
>Cluster 1110
0      34aa, >antibacterial113373... *
>Cluster 1111
0      33aa, >antibacterial;antim... *
1      30aa, >anti-Gram+;antibact... at 43.33%
>Cluster 1112
0      33aa, >antibacterial... *
1      33aa, >antibacterial... at 63.64%
2      33aa, >antibacterial... at 66.67%
>Cluster 1113
0      33aa, >Antifungal... *
>Cluster 1114
0      33aa, >antibacterial;antim... *
>Cluster 1115
0      33aa, >antibacterial;antim... *
>Cluster 1116
0      33aa, >antifungal;antimicr... *
1      18aa, >antimicrobial... at 44.44%
>Cluster 1117
0      33aa, >antimicrobial... *
1      33aa, >anti-Gram+;Antibact... at 72.73%
>Cluster 1118
0      32aa, >Gram-... at 50.00%
1      33aa, >Antifungal;Gram-... *
2      32aa, >antibacterial08463... at 43.75%
>Cluster 1119
0      33aa, >antibacterial07851... *
1      30aa, >antibacterial... at 83.55%
>Cluster 1120
0      33aa, >antibacterial08019... *
>Cluster 1121
0      33aa, >antibacterial08233... *
>Cluster 1122
0      33aa, >antibacterial08548... *
>Cluster 1123

```



```

0      33aa, >antibacterial09903... *
>Cluster 1124
0      33aa, >antibacterial10870... *
>Cluster 1125
0      33aa, >antibacterial10876... *
1      29aa, >antibacterial1... at 79.31%
>Cluster 1126
0      33aa, >antibacterial11312... *
>Cluster 1127
0      33aa, >antibacterial11765... *
>Cluster 1128
0      33aa, >antibacterial11768... *
>Cluster 1129
0      33aa, >antibacterial12139... *
>Cluster 1130
0      33aa, >antibacterial12594... *
>Cluster 1131
0      33aa, >antibacterial12833... *
>Cluster 1132
0      23aa, >Antimicrobial... at 86.96%
1      23aa, >Anti-Gram-... at 69.57%
2      18aa, >Antimicrobial... at 83.33%
3      23aa, >antibacterial... *
4      23aa, >antibacterial... at 43.48%
5      22aa, >antibacterial... at 82.61%
6      28aa, >antibacterial... at 65.22%
7      23aa, >antibacterial... at 60.87%
8      23aa, >antibacterial... at 56.52%
9      23aa, >antibacterial... at 56.52%
10     24aa, >antibacterial... at 82.61%
11     23aa, >antibacterial... at 65.22%
12     33aa, >antibacterial... *
>Cluster 1133
0      32aa, >antimicrobial... *
1      32aa, >antibacterial;antim... at 40.62%
>Cluster 1134
0      32aa, >antibacterial;Antif... *
>Cluster 1135
0      32aa, >antimicrobial... *
1      13aa, >antibacterial07603... at 46.15%
>Cluster 1136
0      32aa, >antimicrobial... *
>Cluster 1137
0      32aa, >antimicrobial... *
>Cluster 1138
0      32aa, >antimicrobial... *
>Cluster 1139
0      32aa, >antimicrobial... *
>Cluster 1140
0      32aa, >antibacterial... *
>Cluster 1141
0      32aa, >antibacterial... *
>Cluster 1142
0      32aa, >antibacterial... *

```

```

>Cluster 1143
0      31aa, >antibacterial;antim... *
1      18aa, >antibacterial... at 44.44%
>Cluster 1144
0      28aa, >antifungal;antimicr... at 42.86%
1      31aa, >anti-Gram+;Antifung... *
2      31aa, >antifungal;antimicr... at 51.61%
>Cluster 1145
0      31aa, >antibacterial;antith... *
>Cluster 1146
0      28aa, >anti-Gram-;Antibact... at 46.43%
1      31aa, >anti-Gram+;antimicr... *
2      31aa, >antimicrobial... at 67.74%
3      31aa, >antibacterial09003... at 61.29%
4      31aa, >antibacterial09004... at 54.84%
>Cluster 1147
0      31aa, >antimicrobial... *
1      31aa, >antibacterial;antim... at 83.55%
2      19aa, >antibacterial09498... at 42.11%
>Cluster 1148
0      31aa, >antimicrobial... *
1      30aa, >antimicrobial... at 83.55%
>Cluster 1149
0      31aa, >antimicrobial... *
>Cluster 1150
0      31aa, >antibacterial06665... *
1      25aa, >antibacterial06960... at 73.10%
2      29aa, >antibacterial09876... at 80.10%
>Cluster 1151
0      31aa, >antibacterial08018... *
>Cluster 1152
0      31aa, >antibacterial08066... *
>Cluster 1153
0      31aa, >antibacterial10933... *
>Cluster 1154
0      31aa, >antibacterial13150... *
>Cluster 1155
0      13aa, >antibacterial06600... at 46.15%
1      23aa, >antibacterial09226... at 47.83%
2      28aa, >antibacterial09481... at 60.71%
3      21aa, >antibacterial09525... at 47.62%
4      31aa, >antibacterial13182... *
>Cluster 1156
0      31aa, >antibacterial13324... *
>Cluster 1157
0      30aa, >antibacterial09773... *
>Cluster 1158
0      30aa, >antibacterial09852... *
>Cluster 1159
0      24aa, >antibacterial10362... at 41.67%
1      30aa, >antibacterial11377... *
>Cluster 1160
0      30aa, >antibacterial12793... *
>Cluster 1161

```

```

0      30aa, >antibacterial13318... *
>Cluster 1162
0      29aa, >Antimicrobial... *
1      29aa, >Antimicrobial... at 41.38%
2      28aa, >anti-Gram-;antibact... at 46.43%
3      29aa, >Antimicrobial... at 44.83%
>Cluster 1163
0      29aa, >anti-Gram+;Antibact... *
1      18aa, >Antimicrobial... at 44.44%
>Cluster 1164
0      29aa, >antimicrobial... *
>Cluster 1165
0      29aa, >antimicrobial... *
>Cluster 1166
0      29aa, >anti-Gram+;antifung... *
1      18aa, >antibacterial09675... at 44.44%
>Cluster 1167
0      29aa, >anti-Gram+;antifung... *
>Cluster 1168
0      29aa, >anti-Gram+;Antibact... *
1      26aa, >antibacterial10275... at 53.85%
>Cluster 1169
0      29aa, >antibacterial;Antif... *
1      29aa, >antibacterial13028... at 82.76%
2      26aa, >antibacterial13029... at 73.10%
>Cluster 1170
0      29aa, >antibacterial07366... *
>Cluster 1171
0      14aa, >antibacterial07583... at 42.86%
1      23aa, >antibacterial07584... at 47.83%
2      29aa, >antibacterial07880... *
3      19aa, >antibacterial07891... at 52.63%
4      29aa, >antibacterial07892... at 79.31%
5      29aa, >antibacterial07893... at 58.62%
6      29aa, >antibacterial07894... at 72.41%
7      22aa, >antibacterial08433... at 45.45%
8      15aa, >antibacterial09647... at 35.00%
9      19aa, >antibacterial09691... at 42.11%
10     29aa, >antibacterial09915... at 68.97%
11     21aa, >antibacterial09916... at 71.43%
12     19aa, >antibacterial09936... at 68.42%
13     19aa, >antibacterial09937... at 63.16%
14     21aa, >antibacterial09968... at 57.14%
15     21aa, >antibacterial09969... at 52.38%
16     19aa, >antibacterial09978... at 57.89%
17     25aa, >antibacterial09983... at 76.00%
18     28aa, >antibacterial09984... at 67.86%
19     25aa, >antibacterial09985... at 56.00%
20     28aa, >antibacterial09986... at 60.71%
21     28aa, >antibacterial09987... at 67.86%
22     14aa, >antibacterial10190... at 42.86%
>Cluster 1172
0      29aa, >antibacterial11265... *
>Cluster 1173

```

```
0      29aa, >antibacterial11455... *
>Cluster 1174
0      29aa, >antibacterial12754... *
>Cluster 1175
0      18aa, >antibacterial12669... at 44.44%
1      29aa, >antibacterial13107... *
>Cluster 1176
0      28aa, >anti-Gram+;antifung... *
1      27aa, >antimicrobial... at 82.86%
>Cluster 1177
0      28aa, >antimicrobial... *
>Cluster 1178
0      28aa, >antimicrobial... *
>Cluster 1179
0      28aa, >antibacterial;antim... *
1      28aa, >antibacterial;antim... at 82.86%
2      29aa, >Antibacterial;antim... at 85.71%
>Cluster 1180
0      28aa, >antibacterial06499... *
1      27aa, >antibacterial06704... at 77.78%
2      27aa, >antibacterial06706... at 81.48%
3      28aa, >antibacterial06955... at 85.71%
4      28aa, >antibacterial06956... at 85.71%
5      27aa, >antibacterial07085... at 85.19%
>Cluster 1181
0      21aa, >antibacterial06602... at 52.38%
1      18aa, >antibacterial06613... at 77.78%
2      21aa, >antibacterial06616... at 61.90%
3      28aa, >antibacterial06617... *
4      16aa, >antibacterial06998... at 56.25%
5      13aa, >antibacterial07573... at 46.15%
6      13aa, >antibacterial08026... at 61.54%
7      13aa, >antibacterial09599... at 46.15%
>Cluster 1182
0      28aa, >antibacterial06673... *
1      28aa, >antibacterial07424... at 75.00%
2      28aa, >antibacterial07425... at 75.00%
3      28aa, >antibacterial07428... at 67.86%
4      28aa, >antibacterial07430... at 67.86%
>Cluster 1183
0      28aa, >antibacterial06771... *
>Cluster 1184
0      28aa, >antibacterial07067... *
1      29aa, >antibacterial07068... at 82.86%
2      29aa, >antibacterial07070... at 79.86%
>Cluster 1185
0      28aa, >antibacterial07383... *
>Cluster 1186
0      23aa, >antibacterial07777... at 61.54%
1      28aa, >antibacterial07804... *
>Cluster 1187
0      28aa, >antibacterial08879... *
>Cluster 1188
0      26aa, >antibacterial09204... at 53.85%
```

```
1      19aa, >antibacterial09214... at 47.37%
2      28aa, >antibacterial09477... *
3      28aa, >antibacterial09482... at 50.00%
4      19aa, >antibacterial09503... at 42.11%
5      21aa, >antibacterial09510... at 52.38%
6      21aa, >antibacterial09514... at 46.67%
7      22aa, >antibacterial09524... at 35.45%
8      26aa, >antibacterial10250... at 38.31%
9      19aa, >antibacterial11647... at 32.11%
>Cluster 1189
0      25aa, >antibacterial;antim... at 35.00%
1      28aa, >antibacterial10254... *
>Cluster 1190
0      28aa, >antibacterial10261... *
>Cluster 1191
0      13aa, >antibacterial10427... at 46.15%
1      28aa, >antibacterial10743... *
>Cluster 1192
0      28aa, >antibacterial10888... *
>Cluster 1193
0      28aa, >antibacterial11386... *
1      25aa, >antibacterial113149... at 48.00%
>Cluster 1194
0      28aa, >antibacterial11507... *
1      28aa, >antibacterial11508... at 78.57%
>Cluster 1195
0      28aa, >antibacterial11921... *
>Cluster 1196
0      28aa, >antibacterial11963... *
>Cluster 1197
0      28aa, >antibacterial11999... *
>Cluster 1198
0      28aa, >antibacterial12751... *
1      28aa, >antibacterial12782... at 42.86%
>Cluster 1199
0      28aa, >antibacterial12762... *
1      28aa, >antibacterial12773... at 46.43%
>Cluster 1200
0      28aa, >antibacterial12770... *
>Cluster 1201
0      28aa, >antibacterial12784... *
>Cluster 1202
0      28aa, >antibacterial12906... *
>Cluster 1203
0      28aa, >antibacterial12975... *
>Cluster 1204
0      28aa, >antibacterial12995... *
>Cluster 1205
0      27aa, >Antifungal... *
>Cluster 1206
0      27aa, >antifungal;antimicr... *
>Cluster 1207
0      27aa, >antimicrobial... *
>Cluster 1208
```

```

0      27aa, >antibacterial07072... *
1      25aa, >antibacterial07380... at 48.00%
>Cluster 1209
0      27aa, >antibacterial07450... *
>Cluster 1210
0      27aa, >antibacterial09755... *
1      27aa, >antibacterial09756... at 74.07%
2      27aa, >antibacterial09757... at 74.07%
3      27aa, >antibacterial09758... at 66.67%
>Cluster 1211
0      27aa, >antibacterial13321... *
>Cluster 1212
0      26aa, >antimicrobial... *
>Cluster 1213
0      26aa, >anti-Gram-;antibact... *
>Cluster 1214
0      26aa, >anti-Gram-;antibact... *
>Cluster 1215
0      26aa, >antimicrobial... *
>Cluster 1216
0      26aa, >antibacterial;antim... *
>Cluster 1217
0      26aa, >antibacterial;antim... *
1      26aa, >antibacterial;antim... at 65.38%
2      26aa, >antibacterial09733... at 61.54%
>Cluster 1218
0      26aa, >antimicrobial... *
>Cluster 1219
0      26aa, >anti-Gram+;antibact... *
1      14aa, >antibacterial08745... at 42.86%
>Cluster 1220
0      26aa, >antimicrobial... *
>Cluster 1221
0      26aa, >antimicrobial... *
>Cluster 1222
0      26aa, >Antimicrobial... *
>Cluster 1223
0      26aa, >antibacterial08073... *
>Cluster 1224
0      26aa, >antibacterial08403... *
>Cluster 1225
0      14aa, >antibacterial07582... at 42.86%
1      26aa, >antibacterial08598... *
2      26aa, >antibacterial09057... at 42.31%
3      26aa, >antibacterial09948... at 42.31%
>Cluster 1226
0      25aa, >Antimicrobial... at 38.00%
1      12aa, >antibacterial09017... at 41.67%
2      26aa, >antibacterial09053... *
3      26aa, >antibacterial09055... at 84.62%
4      12aa, >antibacterial09264... at 58.33%
5      13aa, >antibacterial09283... at 46.15%
6      15aa, >antibacterial09654... at 35.00%
7      26aa, >antibacterial10341... at 49.23%

```

```
>Cluster 1227
0      26aa, >antibacterial09801... *
>Cluster 1228
0      20aa, >antibacterial11321... at 50.00%
1      26aa, >antibacterial11374... *
>Cluster 1229
0      26aa, >antibacterial11399... *
>Cluster 1230
0      26aa, >antibacterial11446... *
>Cluster 1231
0      26aa, >antibacterial112439... *
>Cluster 1232
0      26aa, >antibacterial112641... *
>Cluster 1233
0      26aa, >antibacterial112908... *
>Cluster 1234
0      26aa, >antibacterial113317... *
>Cluster 1235
0      25aa, >Antifungal... *
>Cluster 1236
0      25aa, >antibacterial11450... *
>Cluster 1237
0      25aa, >antibacterial11464... *
>Cluster 1238
0      23aa, >Antimicrobial... at 78.26%
1      24aa, >antimicrobial... *
>Cluster 1239
0      24aa, >antimicrobial... *
>Cluster 1240
0      24aa, >antimicrobial... *
>Cluster 1241
0      23aa, >antibacterial... at 82.61%
1      24aa, >antibacterial06549... *
>Cluster 1242
0      23aa, >antifungal;antimicr... at 86.96%
1      24aa, >antibacterial110678... *
>Cluster 1243
0      23aa, >antibacterial06454... at 43.48%
1      24aa, >antibacterial112379... *
>Cluster 1244
0      23aa, >antibacterial07365... *
1      23aa, >antibacterial09212... at 81.30%
2      23aa, >antibacterial09213... at 81.30%
>Cluster 1245
0      23aa, >antibacterial07666... *
>Cluster 1246
0      23aa, >antibacterial08402... *
>Cluster 1247
0      23aa, >antibacterial112934... *
>Cluster 1248
0      23aa, >antibacterial113209... *
>Cluster 1249
0      22aa, >Antimicrobial... *
>Cluster 1250
```

```

0      21aa, >antimicrobial... *
>Cluster 1251
0      21aa, >anti-Gram+;Gram-... *
>Cluster 1252
0      21aa, >antibacterial08807... *
>Cluster 1253
0      21aa, >antibacterial08923... *
1      23aa, >antibacterial10290... at 85.71%
2      22aa, >antibacterial10292... at 85.71%
3      21aa, >antibacterial12991... at 85.45%
>Cluster 1254
0      21aa, >antibacterial09902... *
1      14aa, >antibacterial10322... at 50.00%
2      13aa, >antibacterial10429... at 46.15%
>Cluster 1255
0      21aa, >antibacterial10582... *
>Cluster 1256
0      21aa, >antibacterial10889... *
>Cluster 1257
0      21aa, >antibacterial12740... *
>Cluster 1258
0      14aa, >antibacterial08746... at 57.14%
1      12aa, >antibacterial09016... at 41.67%
2      15aa, >antibacterial09655... at 46.67%
3      19aa, >antibacterial09666... at 42.11%
4      19aa, >antibacterial09668... at 42.11%
5      19aa, >antibacterial09689... at 42.11%
6      19aa, >antibacterial09690... at 47.37%
7      19aa, >antibacterial09700... at 47.37%
8      11aa, >antibacterial09822... at 45.45%
9      16aa, >antibacterial10319... at 56.25%
10     15aa, >antibacterial10320... at 35.00%
11     19aa, >antibacterial10323... at 68.42%
12     18aa, >antibacterial10324... at 72.22%
13     20aa, >antibacterial10329... *
14     13aa, >antibacterial10692... at 46.15%
>Cluster 1259
0      19aa, >antibacterial07642... *
1      19aa, >antibacterial07643... at 68.42%
2      19aa, >antibacterial07644... at 63.16%
3      19aa, >antibacterial07645... at 78.95%
4      19aa, >antibacterial09671... at 57.89%
5      19aa, >antibacterial09697... at 42.11%
6      15aa, >antibacterial09701... at 35.00%
7      14aa, >antibacterial09702... at 42.86%
8      13aa, >antibacterial09703... at 46.15%
>Cluster 1260
0      19aa, >antibacterial08387... *
>Cluster 1261
0      18aa, >anti-Gram-;antibact... *
>Cluster 1262
0      18aa, >anti-Gram+;antibact... *
>Cluster 1263
0      18aa, >antibacterial09328... *

```



```
>Cluster 1264
0      13aa, >antibacterial07572... *
1      11aa, >antibacterial09191... at 63.64%
>Cluster 1265
0      13aa, >antibacterial10281... *
>Cluster 1266
0      13aa, >antibacterial10423... *
1      14aa, >antibacterial10424... at 82.11%
2      12aa, >antibacterial10434... at 87.31%
>Cluster 1267
0      12aa, >antibacterial08033... *
1      12aa, >antibacterial10112... at 41.67%
```

The representative sequence denoted with the \* symbol at the end of the line; The non-representative sequences displayed with the percentage of sequence similarity to the representative sequence of that cluster.
