# Supplementary material for: Ensemble-AMPPred: Robust AMP Prediction and Recognition Using the Ensemble Learning Method with a New Hybrid Feature for Differentiating AMPs
Source: MDPI journal article supplement (doi:10.3390/genes12020137), 2021-01-21
Supplement: s1 [file s1]

Performance comparison of machine learning models when trained with imbalanced datasets with the ratio of AMPs to nonAMPs equal to 1:2 (900 AMPs and 1800 non-AMPs).

| Model                        | MLP              | SVM              | KNN              | RBF              | LDA              | NB               | DT               | DL               |
|------------------------------|------------------|------------------|------------------|------------------|------------------|------------------|------------------|------------------|
| Training Accuracy            | 80.26%           | 85.48%           | 86.48%           | 83.03%           | 84.07%           | 78.67%           | 77.96%           | 83.59%           |
| Training AUC                 | 0.798            | 0.874            | 0.902            | 0.868            | 0.906            | 0.863            | 0.682            | 0.906            |
| Training True Positive (TP)  | 0.607            | 0.729            | 0.725            | 0.788            | 0.712            | 0.808            | 0.591            | 0.655            |
| Training True Negative (TN)  | 0.901            | 0.918            | 0.935            | 0.852            | 0.905            | 0.776            | 0.874            | 0.926            |
| Training False Positive (FP) | 0.099            | 0.082            | 0.065            | 0.148            | 0.095            | 0.224            | 0.126            | 0.074            |
| Training False Negative (FN) | 0.393            | 0.271            | 0.275            | 0.212            | 0.288            | 0.192            | 0.409            | 0.345            |
| Testing Dataset 1            |                  |                  |                  |                  |                  |                  |                  |                  |
| AMP (11,634)                 | 5,869<br>50.44%  | 6,604<br>56.76%  | 8,417<br>72.35%  | 7,626<br>65.54%  | 6,713<br>57.70%  | 6,171<br>53.04%  | 6,975<br>59.95%  | 7,427<br>63.84%  |
| Non-AMP (35,795)             | 33,557<br>93.75% | 34,130<br>95.34% | 33,983<br>94.94% | 35,006<br>97.79% | 34,467<br>96.29% | 29,976<br>83.74% | 31,586<br>88.24% | 34,857<br>97.38% |
| Testing Dataset 2            |                  |                  |                  |                  |                  |                  |                  |                  |
| AMP_S1 (1,461)               | 880<br>60.26%    | 859<br>58.79%    | 994<br>68.03%    | 727<br>49.76%    | 761<br>52.09%    | 643<br>44.01%    | 576<br>39.42%    | 827<br>56.60%    |
| AMP_S2 (917)                 | 516<br>56.27%    | 586<br>63.90%    | 662<br>72.19.%   | 492<br>53.65%    | 560<br>61.07%    | 498<br>54.31%    | 559<br>60.96%    | 527<br>57.47%    |
| Non-AMP S1 (2,404)           | 1,950<br>81.11%  | 2,067<br>85.98%  | 2,108<br>87.69%  | 1,963<br>81.65%  | 2,000<br>83.19%  | 1,755<br>73.01%  | 1,946<br>80.95%  | 2,177<br>90.56%  |
| Non-AMP S2 (828)             | 694<br>83.82%    | 731<br>88.28%    | 784<br>94.69%    | 791<br>95.53%    | 795<br>96.01%    | 662<br>79.95%    | 732<br>88.40%    | 753<br>90.95%    |

Performance comparison of machine learning models when trained with imbalanced datasets with the ratio of AMPs to nonAMPs equal to 1:3 (600 AMPs and 1800 non-AMPs).

| Model                        | MLP              | SVM              | KNN              | RBF              | LDA              | NB               | DT               | DL               |
|------------------------------|------------------|------------------|------------------|------------------|------------------|------------------|------------------|------------------|
| Training Accuracy            | 79.08%           | 81.92%           | 81.12%           | 77.71%           | 85.75%           | 73.12%           | 84.87%           | 87.21%           |
| Training AUC                 | 0.708            | 0.838            | 0.843            | 0.768            | 0.807            | 0.728            | 0.785            | 0.903            |
| Training True Positive (TP)  | 0.331            | 0.445            | 0.371            | 0.411            | 0.666            | 0.592            | 0.721            | 0.735            |
| Training True Negative (TN)  | 0.944            | 0.944            | 0.958            | 0.899            | 0.921            | 0.778            | 0.891            | 0.918            |
| Training False Positive (FP) | 0.056            | 0.056            | 0.042            | 0.101            | 0.079            | 0.222            | 0.109            | 0.082            |
| Training False Negative (FN) | 0.669            | 0.555            | 0.629            | 0.589            | 0.334            | 0.408            | 0.279            | 0.265            |
| Testing Dataset 1            |                  |                  |                  |                  |                  |                  |                  |                  |
| AMP (11,634)                 | 4,558<br>39.18%  | 6,324<br>54.36%  | 7,053<br>60.62%  | 5,337<br>45.87%  | 6,423<br>55.21%  | 5,794<br>49.80%  | 4,796<br>41.22%  | 5,857<br>50.34%  |
| Non-AMP (35,795)             | 34,226<br>95.62% | 34,978<br>97.71% | 35,346<br>98.75% | 33,142<br>92.59% | 33,878<br>94.64% | 30,901<br>86.33% | 25,962<br>72.53% | 33,740<br>94.26% |
| Testing Dataset 2            |                  |                  |                  |                  |                  |                  |                  |                  |
| AMP_S1 (1,461)               | 758<br>51.88%    | 685<br>46.89%    | 774<br>52.97%    | 663<br>45.37%    | 696<br>47.64%    | 599<br>40.99%    | 386<br>26.42%    | 713<br>48.83%    |
| AMP_S2 (917)                 | 411<br>44.82%    | 572<br>62.38%    | 506<br>55.17%    | 411<br>44.82%    | 571<br>62.27%    | 464<br>50.59%    | 369<br>40.23%    | 440<br>47.98%    |
| Non-AMP S1 (2,404)           | 2,317<br>96.38%  | 2,093<br>87.06%  | 2,260<br>94.01%  | 2,116<br>88.02%  | 2,117<br>88.06%  | 1,945<br>80.91%  | 2,007<br>83.48%  | 2,189<br>91.06%  |
| Non-AMP S2 (828)             | 827<br>99.87%    | 801<br>96.73%    | 826<br>99.76%    | 780<br>94.20%    | 784<br>94.68%    | 652<br>78.74%    | 735<br>88.76%    | 811<br>97.95%    |
